# Supplementary material for: Technical Note: Mineralogical, chemical, morphological, and optical interrelationships of mineral dust re-suspensions
Source: Copernicus journal article supplement (doi:10.5194/acp-2016-286), 2016-04-22
Supplement: Supplementary file 1 [file acp-2016-286-supplement.pdf]

## Supplement S1 – Grab Sampling Sites

| Sample | Sample Type                  | Country-Region                       | Locality                                             | Coordinates, Elevation                    |
|--------|------------------------------|--------------------------------------|------------------------------------------------------|-------------------------------------------|
| S1000  | Hematite (Fe2O3)             | Chemical                             | Laboratory                                           |                                           |
| S1005  | Sand pit                     | Spain - Las Canarias - Lanzarote     | La Mala                                              | 29° 05' 50.50" N, 13° 27' 43.92" W, 39m   |
| S1006  | Sand pit                     | Spain - Las Canarias - Lanzarote     | La Mala                                              | 29° 5'49.79"N, 13°27'44.83" W, 33m        |
| S1007  | Sediment                     | Spain - Las Canarias - Lanzarote     | Mirador del Rio                                      | 29°13'39.86"N, 13°28'20.92"W, 350m        |
| S1008  | Soil                         | Spain - Las Canarias - Lanzarote     | Vega de Femes                                        | 28°55'22.71"N, 13°45'52.71"W, 300m        |
| S1009  | Surface soil                 | Mali                                 | above Bamako                                         | 12°41'17"N, 8°01'39"W, 554m               |
| S1010  | Surface soil                 | Mali                                 | Bamako                                               | 12°41'17"N, 8°01'39"W, 554m               |
| S1011  | Surface soil                 | Mali                                 | West Bamako                                          | 12°41'17"N, 8°01'39"W, 554m               |
| S1013  | Surface soil                 | Cabo Verde                           | Ponta Fiúra, Sal Island                              | 16°51'3.63"N, 22°54'54.37"W, 12m          |
| S1014  | Surface dust                 | China                                | NW China, 500 km north of Taklamakan                 | 45°03'47.4"N, E84°42'11"E, 268m           |
| S1016  | Surface dust                 | China                                | NW China, 530 km north of Taklamakan                 | 45°23'22.6"N, 84°48'33.5"E, 267m          |
| S1017  | Green dust                   | China                                | Daemon City, Xinjiang, 650 km north of Taklamakan    | 46°07'30.8"N, 85°44'11.6"E                |
| S1018  | Green dust                   | China                                | Daemon City, Xinjiang, 650km north of Taklamakan     | 46°07'34"N, 85°44'17.6"E, 305m            |
| S1019  | Playa dust                   | USA                                  | Owens Lake, CA                                       | 36°28'2.86"N, 118° 1'41.49"W, 1109m       |
| S1022  | Playa deposit                | Namibia                              | Etosha, Fischer Pan                                  | 18°43'35.92"S, 17° 0'43.89"E, 1086m       |
| S1023  | Playa deposit                | Namibia                              | Etosha, Stinkwater                                   | 18°37'54.38"S, 16°49'44.48"E, 1085m       |
| S1024  | Playa deposit                | Namibia                              | Etosha, Lookout                                      | 18°56'26.60"S, 16°29'34.79"E, 1088m       |
| S1025  | Dune sand                    | Morocco                              | Lake Iriki                                           | 29°50'17.02"N, 6°30'44.51"W, 450m         |
| S1027  | Soil                         | Spain - Las Canarias - Gran Canaria  | Galdar                                               | 28° 8'43.17"N, 15°37'47.77"W, 172m        |
| S1033  | Calima dust? Pockets in lava | Spain - Las Canarias - Fuerteventura | Fuerteventura, Pozo Negro, off road FV-420           | 28° 19' 42.42"N, 13° 54' 41.27" W, 30m    |
| S1034  | Calima dust? Pockets in lava | Spain - Las Canarias - Fuerteventura | Fuerteventura, Pozo Negro, off road FV-420           | 28° 19' 40.47" N, 13° 54' 43.63" W, 31m   |
| S1035  | Clay soil near gabias (8 FV) | Spain - Las Canarias - Fuerteventura | La Ampuyenta, off FV-20                              | 28° 27' 02.00" N, 14° 00' 03.68" W, 289m  |
| S1038  | Playa dust                   | Botswana                             | Makgadikgadi Pan                                     | 21°12'32.42"S, E24°51'30.47"E, 912m       |
| S1039  | Playa dust                   | Botswana                             | Makgadikgadi Pan                                     | 21°01'18.02"S, 24°21'38.41"E, 916m        |
| S1040  | Playa dust                   | Botswana                             | Nxai Pan                                             | 20°07'02.03"S, 24°45'54.37"E, 914m        |
| S1041  | Playa dust                   | Botswana                             | Nxai Pan                                             | 19°53'28.45"S, 24°45'43.88"E, 928m        |
| S1042  | Surface Soil                 | Chile                                | Atacama, Yungay (Rock Garden)                        | 25°56'56.89"S, 70°27'45.81"W, 777m        |
| S1045  | Playa surface soil           | USA                                  | Black Rock playa, Northern Nevada                    | 40°45'10.57"N, 119°13'59.38"W, 1196m      |
| S1049  | Playa surface dust           | Chad                                 | Bodélé Depression                                    | 16°08'08.34"N, 18°35'55.80"E, 266m        |
| S1050  | Playa surface dust           | Chad                                 | Bodélé Depression                                    | 16°13'16.38"N, 18°36'23.82"E, 270m        |
| S1051  | Playa surface dust           | Chad                                 | Bodélé Depression                                    | 16°13'16.38"N, 18°36'23.82"E, 270m        |
| S1052  | Peavine Mtn diatom layer     | USA                                  | Peavine, hillside outcrop, white diatomaceous shale  | 39°32'50.58"N, 119°54'46.53"W, 1650 m     |
| S1053  | Peavine Mtn oxide layer      | USA                                  | Peavine, sedimentary outcrop, yellow limonite soil   | 39°32'45.30"N, 119°54'56.62"W, 1617m      |
| S1055  | Loess Plateau                | China                                | Jiuzhoutai Mtn summit, 6.5 km NW of Lanzhou City     | 36°06'09.77"N, 103°46'56.91"E, 2032m      |
| S1056  | Riverbed surface deposit     | Australia                            | Cooper Creek, Lake Eyre, South Australia             | 28°31'20.28"S, 137°55'24.60"E, -6 m       |
| S1057  | Riverbed surface deposit     | Australia                            | Warburton River, Lake Eyre, South Australia          | 27°46'56.64"S, 137°50'01.32"E, 2m         |
| S1058  | Lake inflow surface deposit  | Australia                            | Lake Frome, South Australia                          | 30°38'13.2"S, 139°39'21.6"E, 1 m          |
| S1060  | Loess deposit                | Serbia                               | Batajnica, Danube                                    | 44°55'28.59"N, 20°19'10.67"E, 95m         |
| S1062  | Loess deposit                | Serbia                               | Kostolac, Lignite pit                                | 44°44'11.95"N, 21°14'43.11"E, 71m         |
| S1064  | Loess deposit                | Serbia                               | Stari Slankamen, Lowest Loess section                | 45°07'55.85"N, 20°15'48.96"E, 94m         |
| S1065  | Fireclay (milled)            | USA                                  | Carbondale red clay, Amador County, California       | undisclosed                               |
| S1066  | Road dust (milled)           | USA                                  | Arizona road dust                                    | undisclosed                               |
| S2001  | Surface soil                 | Djibouti                             | Lemonière, Site 1                                    | 11°32'34.32"N, 43°09'35.72"E, 8m          |
| S2002  | Surface soil                 | Afghanistan                          | Bagram, Site 2                                       | 34°56'25.59"N, 69°17'6.87"E, 1475m        |
| S2003  | Surface soil                 | Afghanistan                          | Khowst (Salerno), Site 3                             | 33°21'54.96"N, 69°57'14.87"E, 1158m       |
| S2004  | Surface soil                 | Qatar                                | Al Udeid Air Base (Abu Nahlah Airport), Site 4       | 25° 7'4.50"N, 51°18'59.63"E, 35m          |
| S2005  | Surface soil                 | UAE                                  | Al Dhafra, Site 5                                    | 24°14'40.61"N, 54°32'51.45"E, 11m         |
| S2006  | Surface soil                 | Iraq                                 | Joint Base Balad (Anaconda), Site 6                  | 33°56'38.64"N, 44°21'23.37"E, 46m         |
| S2007  | Surface soil                 | Iraq                                 | Camp Victory, Site 7                                 | 33°15'17.09"N, 44°13'26.87"E, 34m         |
| S2008  | Surface soil                 | Iraq                                 | Tallil (Camp Adder), Site 8                          | 30°56'12.04"N, 46° 5'14.89"E, 4m          |
| S2009  | Surface soil                 | Iraq                                 | Tikrit (Contingency Operating Base Speicher), Site 9 | 34°40'31.27"N, 43°33'16.94"E, 129m        |
| S2010  | Surface soil                 | Iraq                                 | Taji, Site 10                                        | 33°31'16.01"N, 44°15'25.25"E, 40m         |
| S2011  | Surface soil                 | Iraq                                 | Al Asad, Site 11                                     | 33°47'28.25"N, 42°27'24.38"E, 174m        |
| S2012  | Surface soil                 | Kuwait                               | Northern Kuwait (Camp Buehring), Site 12             | 29°41'52.56"N, 47°25'23.34"E, 132m        |
| S2013  | Surface soil                 | Kuwait                               | Central Kuwait (Camp Ali Al Salem), Site 13          | 29°21'17.59"N, 47°31'29.72"E, 141m        |
| S2014  | Surface soil                 | Kuwait                               | Coastal Kuwait (Ash Shu Ayabah), Site 14             | 29° 2'21.11"N, 48° 7'55.31"E, 27m         |
| S2015  | Surface soil                 | Kuwait                               | Southern Kuwait (Camp Arifjan), Site 15              | 28°52'43.47"N, 48°10'9.03"E, 38m          |
| S2016  | Surface soil                 | Afghanistan                          | Helmand Province (Camp Leatherneck), Site 16         | 31°51'50.13"N, 64°11'42.75"E, 890m        |
| S2017  | Surface soil                 | Kuwait                               | Coastal Kuwait (Ash Shu Ayabah), Site 17             | 29°02'30.66"N, 48°07'04.79"E, 32m         |
| S3003  | Gunpad soil                  | USA                                  | Yuma Proving Ground (YPG), AZ, Area 3835Z            | 32° 52' 27.06"N, 114° 12' 31.84"W, 208m   |
| S3004  | Gunpad soil                  | USA                                  | Yuma Proving Ground (YPG), AZ, 26500R                | 32° 51' 48.62"N, 114° 10' 50.72"W, 215m   |
| S3008  | Desert pavement              | USA                                  | Roadrunner, Yuma Proving Ground, Yuma, AZ            | 32° 54' 25.43"N, 114° 21' 20.72"W, 152m   |
| S3011  | Unpaved road                 | USA                                  | Ft. Carson, CO                                       | 38° 42' 30.79"N, 104° 47' 10.56"W, 1774m  |
| S3016  | Built dirt road              | USA                                  | Dugway Proving Ground, UT                            | 40° 04' 36.84"N, 113° 10' 14.88"W, 1316 m |
| S3017  | Built dirt road              | USA                                  | Dugway Proving Ground, UT                            | 40° 11' 30.10"N, 113° 09' 50.05"W, 1313m  |

Supplement S2.1 – Optical Mineralogy on >38µm to <125 µm Particles

| Sample | Locality             | Optical Mineralogy (qualitative), on > 38 µm, < 125 µm sieved soil fractions |                                                                     |            |
|--------|----------------------|------------------------------------------------------------------------------|---------------------------------------------------------------------|------------|
|        | Country              | Major 20-100%                                                                | Minor 5-20%                                                         | Trace <5%  |
| S1000  | Chemical             | submicroscopic, oxides                                                       |                                                                     |            |
| S1005  | Spain - Las Canarias | calcite, quartz                                                              | muscovite, plagioclase, obsidian, pyroxene                          |            |
| S1006  | Spain - Las Canarias | calcite (shells), plagioclase                                                | clino-pyroxene, brown obsidian, opaque oxides                       |            |
| S1007  | Spain - Las Canarias | quartz (coated)                                                              | clino-pyroxene (light green), plagioclase, obsidian (brown), oxides |            |
| S1008  | Spain - Las Canarias | plagioclase (oligoclase), orthoclase, quartz (coated)                        | clino-pyroxene                                                      |            |
| S1009  | Mali                 | oxides, quartz                                                               | calcite, muscovite, plagioclase                                     | sphene     |
| S1010  | Mali                 | quartz (coated), oxides                                                      | plagioclase                                                         |            |
| S1011  | Mali                 | quartz (coated)                                                              | oxides                                                              |            |
| S1013  | Cabo Verde           | plagioclase, clino-pyroxene, quartz (coated)                                 |                                                                     | zircon     |
| S1014  | China                | quartz (coated), calcite                                                     | plagioclase, amphibole (actinolite)                                 | zircon     |
| S1016  | China                | quartz (coated)                                                              | plagioclase, muscovite, calcite, amphibole (hornblende), oxides     |            |
| S1017  | China                | quartz (coated), muscovite, biotite                                          | calcite, plagioclase, amphibole (hornblende), clino-pyroxene        |            |
| S1018  | China                | quartz, biotite                                                              | plagioclase, microcline (perthite), oxides                          | zircon     |
| S1019  | USA                  | plagioclase, calcite, quartz (coated), biotite                               | amphibole (hornblende)                                              | epidote    |
| S1022  | Namibia              | quartz (coated)                                                              | calcite, plagioclase, muscovite, clino-pyroxene                     | tourmaline |
| S1023  | Namibia              | quartz (coated), calcite                                                     | plagioclase, amphibole (hornblende), orthoclase                     |            |
| S1024  | Namibia              | calcite                                                                      | quartz, plagioclase                                                 | amphibole  |

Supplement S2.1 – Optical Mineralogy on >38µm to <125 µm Particles

| Sample | Locality             | Optical Mineralogy (qualitative), on > 38 µm, < 125 µm sieved soil fractions |                                                              |           |
|--------|----------------------|------------------------------------------------------------------------------|--------------------------------------------------------------|-----------|
|        | Country              | Major 20-100%                                                                | Minor 5-20%                                                  | Trace <5% |
| S1025  | Morocco              | quartz (coated), calcite, orthoclase, oxides                                 | plagioclase, amphibole (hornblende), orthoclase              |           |
| S1027  | Spain - Las Canarias | quartz (coated)                                                              | orthoclase, amphibole, oxides                                | chlorite  |
| S1033  | Spain - Las Canarias | quartz (coated)                                                              | muscovite, calcite, amphibole, biotite, plagioclase, oxides  | chlorite  |
| S1034  | Spain - Las Canarias | quartz (coated)                                                              | plagioclase, orthoclase, biotite, calcite, amphibole, oxides |           |
| S1035  | Spain - Las Canarias | quartz (coated)                                                              | orthoclase, perthite, biotite, obsidian                      |           |
| S1038  | Botswana             | quartz (coated), orthoclase                                                  | amphibole (hornblende), plagioclase, calcite, oxides         |           |
| S1039  | Botswana             | quartz (coated), orthoclase, calcite                                         | muscovite, plagioclase, amphibole                            | epidote   |
| S1040  | Botswana             | quartz, calcite                                                              | plagioclase, amphibole (hornblende), orthoclase              |           |
| S1041  | Botswana             | quartz (coated)                                                              | amphibole, plagioclase, biotite, muscovite, oxides, calcite  |           |
| S1042  | Chile                | plagioclase, amphibole, quartz (coated)                                      | orthoclase, calcite, biotite, gypsum, oxides                 |           |
| S1045  | USA                  | clay clusters                                                                | calcite, quartz, amphibole (hornblende), plagioclase         |           |
| S1049  | Chad                 | quartz, amorphous (diatoms)                                                  | orthoclase, plagioclase                                      |           |
| S1050  | Chad                 | quartz, amorphous (diatoms)                                                  |                                                              |           |
| S1051  | Chad                 | amorphous (diatoms)                                                          | quartz, plagioclase                                          |           |
| S1052  | USA                  | amorphous (diatoms), quartz                                                  | biotite, plagioclase, pyroxene                               |           |
| S1053  | USA                  | quartz (coated), plagioclase                                                 | amphibole (hornblende), biotite, muscovite, oxides           | epidote   |
| S1055  | China                | quartz, calcite, muscovite, biotite                                          | amphibole (hornblende)                                       | chlorite  |

Supplement S2.1 – Optical Mineralogy on >38µm to <125 µm Particles

| Sample | Locality    | Optical Mineralogy (qualitative), on > 38 µm, < 125 µm sieved soil fractions |                                                            |                  |
|--------|-------------|------------------------------------------------------------------------------|------------------------------------------------------------|------------------|
|        | Country     | Major 20-100%                                                                | Minor 5-20%                                                | Trace <5%        |
| S1056  | Australia   | quartz (coated)                                                              | plagioclase, gypsum, calcite                               |                  |
| S1057  | Australia   | quartz (coated)                                                              | pyroxene, plagioclase, oxides                              |                  |
| S1058  | Australia   | quartz (coated)                                                              | orthoclase, plagioclase, calcite, muscovite, biotite       |                  |
| S1060  | Serbia      | quartz (coated), muscovite                                                   | biotite, plagioclase, orthoclase, oxides                   | chlorite         |
| S1062  | Serbia      | quartz, muscovite                                                            | calcite, biotite, plagioclase, oxides                      | chlorite, zircon |
| S1064  | Serbia      | quartz (coated), muscovite                                                   | calcite, biotite, plagioclase, orthoclase (granophyre)     | chlorite         |
| S1065  | USA         | unidentified, submicroscopic                                                 | unidentified, submicroscopic                               |                  |
| S1066  | USA         | unidentified, submicroscopic                                                 | unidentified, submicroscopic                               |                  |
| S2001  | Djibouti    | calcite, plagioclase (andesine), clino-pyroxene                              | orthoclase, amphibole (hornblende), oxides                 |                  |
| S2002  | Afghanistan | quartz (coated), biotite                                                     | plagioclase, muscovite, amphibole (hornblende), calcite    |                  |
| S2003  | Afghanistan | quartz (coated), calcite                                                     | clino-pyroxene, biotite, plagioclase, amphibole            |                  |
| S2004  | Qatar       | calcite, quartz (coated)                                                     | clino-pyroxene, plagioclase, biotite, muscovite, amphibole |                  |
| S2005  | UAE         | calcite (foraminifera)                                                       | quartz, clino-pyroxene, plagioclase, anhydrite             |                  |
| S2006  | Iraq        | quartz (coated), calcite                                                     | biotite, muscovite, clino-pyroxene, plagioclase            | zircon           |
| S2007  | Iraq        | quartz (coated), plagioclase                                                 | muscovite, biotite, calcite, amphibole (hornblende)        |                  |
| S2008  | Iraq        | quartz (coatings), calcite                                                   | muscovite, clino-pyroxene, plagioclase                     |                  |
| S2009  | Iraq        | quartz (coatings), calcite                                                   | amphibole (hornblende), biotite, plagioclase               |                  |

Supplement S2.1 – Optical Mineralogy on >38µm to <125 µm Particles

| Sample | Locality    | Optical Mineralogy (qualitative), on > 38 µm, < 125 µm sieved soil fractions |                                                                                                         |           |
|--------|-------------|------------------------------------------------------------------------------|---------------------------------------------------------------------------------------------------------|-----------|
|        | Country     | Major 20-100%                                                                | Minor 5-20%                                                                                             | Trace <5% |
| S2010  | Iraq        | quartz (coated), calcite, amphibole (hornblende)                             | plagioclase, biotite, muscovite                                                                         |           |
| S2011  | Iraq        | calcite                                                                      | plagioclase, quartz, amphibole (hornblende), muscovite, oxides                                          |           |
| S2012  | Kuwait      | quartz, calcite                                                              | clino-pyroxene, plagioclase, orthoclase, muscovite, biotite, oxides                                     |           |
| S2013  | Kuwait      | quartz, calcite                                                              | plagioclase, orthoclase, biotite, muscovite, amphibole (hornblende)                                     |           |
| S2014  | Kuwait      | quartz, calcite                                                              | muscovite, clino-pyroxene, serpentine, zeolite (natrolite), plagioclase, amphibole (hornblende), oxides |           |
| S2015  | Kuwait      | calcite, quartz, plagioclase                                                 | amphibole (hornblende), clino-pyroxene, oxides, orthoclase (granophyre)                                 |           |
| S2016  | Afghanistan | quartz, calcite, orthoclase                                                  | biotite, amphibole, plagioclase                                                                         |           |
| S2017  | Kuwait      | quartz, calcite, plagioclase, orthoclase                                     | muscovite, clino-pyroxene, biotite                                                                      |           |
| S3003  | USA         | quartz, biotite                                                              | muscovite, plagioclase, microcline, amphibole (hornblende)                                              |           |
| S3004  | USA         | quartz, calcite, amphibole (hornblende)                                      | plagioclase, biotite, clinopyroxene, oxides                                                             | chlorite  |
| S3008  | USA         | quartz, plagioclase, calcite                                                 | biotite, amphibole (hornblende), muscovite, clino-pyroxene, oxides                                      | chlorite  |
| S3011  | USA         | quartz (coated), plagioclase, calcite                                        | amphibole (hornblende), biotite, muscovite, oxides                                                      |           |
| S3016  | USA         | calcite, quartz, plagioclase                                                 | biotite, muscovite, granophyre, clino-pyroxene, oxides, orthoclase (granophyre)                         |           |
| S3017  | USA         | quartz, calcite, plagioclase                                                 | biotite, muscovite, amphibole, oxides                                                                   |           |

Supplement S2.2 – Mineralogy on <38 µm, Sieved Powders by XRD

| Sample | Locality             | Mineralogy (semi-quantitative) by XRD, on < 38 µm sieved soil fractions |                                                                       |                                                    |
|--------|----------------------|-------------------------------------------------------------------------|-----------------------------------------------------------------------|----------------------------------------------------|
|        | Country              | Major 20-100%                                                           | Minor 5-20%                                                           | Trace <5%                                          |
| S1000  | Chemical             | hematite                                                                |                                                                       |                                                    |
| S1005  | Spain - Las Canarias | calcite, quartz                                                         | illite                                                                | plagioclase, aragonite, dolomite, hematite         |
| S1006  | Spain - Las Canarias | calcite                                                                 | quartz                                                                | aragonite, dolomite, plagioclase, halite, hematite |
| S1007  | Spain - Las Canarias | illite, quartz                                                          | calcite, plagioclase, dolomite, kaolinite                             | hematite                                           |
| S1008  | Spain - Las Canarias | montmorillonite (illite)                                                | muscovite (biotite), quartz, plagioclase, microcline,                 | calcite, goethite, hematite, illite, kaolinite     |
| S1009  | Mali                 | quartz, kaolinite, illite                                               | hematite, goethite, kaolinite, illite                                 | dolomite                                           |
| S1010  | Mali                 | quartz, amorphous                                                       | goethite (6.9%), hematite (1.72%), kaolinite                          | muscovite (biotite), K-feldspar                    |
| S1011  | Mali                 | quartz                                                                  | hematite, goethite, kaolinite, illite                                 | calcite                                            |
| S1013  | Cape Verde           | illite, quartz                                                          | plagioclase, carbonate apatite, halite, kaolinite                     | hematite                                           |
| S1014  | China                | quartz, plagioclase                                                     | kaolinite, muscovite (biotite), calcite, montmorillonite              |                                                    |
| S1016  | China                | quartz                                                                  | kaolinite, muscovite (biotite), plagioclase, calcite, montmorillonite |                                                    |
| S1017  | China                | quartz                                                                  | plagioclase, kaolinite, calcite, muscovite (biotite)                  | sepiolite (serpentine), halite                     |
| S1018  | China                | plagioclase, quartz                                                     | muscovite (biotite)                                                   | halite, sepiolite (serpentine)                     |
| S1019  | USA                  | plagioclase, calcite                                                    | quartz, muscovite (biotite), kaolinite, sepiolite (serpentine)        | amphibole, halite                                  |
| S1022  | Namibia              | calcite, sepiolite                                                      | halite, quartz, dolomite                                              |                                                    |
| S1023  | Namibia              | halite, thenardite, quartz                                              | dolomite                                                              | calcite                                            |
| S1024  | Namibia              | thenardite, halite                                                      | dolomite, calcite                                                     | sepiolite (serpentine), analcime                   |

Supplement S2.2 – Mineralogy on <38 µm, Sieved Powders by XRD

| Sample | Locality             |  | Mineralogy (semi-quantitative) by XRD, on < 38 µm sieved soil fractions |                                                                      |                                                              |
|--------|----------------------|--|-------------------------------------------------------------------------|----------------------------------------------------------------------|--------------------------------------------------------------|
|        | Country              |  | Major 20-100%                                                           | Minor 5-20%                                                          | Trace <5%                                                    |
| S1025  | Morocco              |  | quartz, illite                                                          | calcite                                                              | kaolinite, dolomite                                          |
| S1027  | Spain - Las Canarias |  | quartz                                                                  | illite, K-feldspar, plagioclase                                      |                                                              |
| S1033  | Spain - Las Canarias |  | quartz                                                                  | illite, kaolinite, plagioclase, K-feldspar, calcite                  |                                                              |
| S1034  | Spain - Las Canarias |  | quartz, illite                                                          | plagioclase, kaolinite, K-feldspar                                   | amphibole, hematite                                          |
| S1035  | Spain - Las Canarias |  | quartz, illite                                                          | K-feldspar, kaolinite, plagioclase                                   | calcite, amphibole                                           |
| S1038  | Botswana             |  | calcite, illite                                                         | quartz, K-feldspar                                                   | sepiolite, halite                                            |
| S1039  | Botswana             |  | calcite                                                                 | illite, quartz                                                       | sepiolite, K-feldspar, halite                                |
| S1040  | Botswana             |  | halite, trona                                                           | quartz, calcite                                                      | sepiolite or smectite-illite or vermiculite-illite, dolomite |
| S1041  | Botswana             |  | sepiolite                                                               | calcite, quartz                                                      |                                                              |
| S1042  | Chile                |  | quartz, illite                                                          | anhydrite, plagioclase, amphibole                                    | gypsum, montmorillonite (amorphous)                          |
| S1045  | USA                  |  | illite                                                                  | calcite, quartz, kaolinite, halite, K-feldspar, sepiolite, amphibole | plagioclase (stilbite), amorphous                            |
| S1049  | Chad                 |  | amorphous, calcite                                                      | quartz, kaolinite                                                    | K-feldspar, halite                                           |
| S1050  | Chad                 |  | amorphous, calcite                                                      | quartz, kaolinite                                                    | halite                                                       |
| S1051  | Chad                 |  | amorphous, illite, kaolinite, quartz                                    | sepiolite                                                            |                                                              |
| S1052  | USA                  |  | amorphous, plagioclase, illite                                          | stilbite, montmorillonite, quartz, sepiolite                         |                                                              |
| S1053  | USA                  |  | plagioclase, quartz                                                     | palygorskite, montmorillonite, amphibole, (zeolite)                  | amorphous                                                    |
| S1055  | China                |  | quartz                                                                  | illite, calcite, kaolinite, plagioclase                              | K-feldspar, dolomite, hematite                               |

Supplement S2.2 – Mineralogy on <38 µm, Sieved Powders by XRD

| Sample | Locality    | Mineralogy (semi-quantitative) by XRD, on < 38 µm sieved soil fractions |                                                                                 |                                                                                                 |
|--------|-------------|-------------------------------------------------------------------------|---------------------------------------------------------------------------------|-------------------------------------------------------------------------------------------------|
|        | Country     | Major 20-100%                                                           | Minor 5-20%                                                                     | Trace <5%                                                                                       |
| S1056  | Australia   | quartz, illite                                                          | kaolinite, calcite                                                              | K-feldspar, palygorskite, gypsum, amorphous                                                     |
| S1057  | Australia   | quartz, amorphous, illite, kaolinite                                    |                                                                                 | (palygorskite, hematite, amorphous)                                                             |
| S1058  | Australia   | quartz, illite                                                          | kaolinite, halite, plagioclase, amorphous                                       | dolomite, calcite                                                                               |
| S1060  | Serbia      | quartz                                                                  | montmorillonite/chlorite, muscovite (biotite), kaolinite, plagioclase           |                                                                                                 |
| S1062  | Serbia      | quartz                                                                  | muscovite (biotite), kaolinite, dolomite, plagioclase, montmorillonite/chlorite | calcite                                                                                         |
| S1064  | Serbia      | quartz                                                                  | muscovite (biotite), kaolinite, dolomite, plagioclase, montmorillonite/chlorite | calcite                                                                                         |
| S1065  | USA         | quartz, kaolinite                                                       | illite                                                                          | hematite                                                                                        |
| S1066  | USA         | quartz                                                                  |                                                                                 | K-feldspar, plagioclase                                                                         |
| S2001  | Djibouti    | plagioclase                                                             | montmorillonite, augite, ilmenite, magnetite, calcite, quartz                   | hematite, hornblende, amorphous, serpentine                                                     |
| S2002  | Afghanistan | quartz                                                                  | calcite, montmorillonite, plagioclase, muscovite (biotite), chlorite, amorphous | microcline, hornblende, dolomite, kaolinite, ankerite                                           |
| S2003  | Afghanistan | amorphous, quartz                                                       | chlorite, muscovite (biotite), plagioclase,                                     | microcline, serpentine, hematite, hornblende, dolomite                                          |
| S2004  | Qatar       | calcite                                                                 | quartz, dolomite, illite, kaolinite, ankerite, amorphous                        | microcline, muscovite, hornblende, ilmenite, palygorskite, montmorillonite                      |
| S2005  | UAE         | calcite, quartz                                                         | plagioclase                                                                     | muscovite (biotite), microcline, gypsum, chlorite, hematite                                     |
| S2006  | Iraq        | calcite                                                                 | quartz, muscovite (biotite), montmorillonite, chlorite, plagioclase, amorphous  | dolomite, microcline, halite, kaolinite, gypsum, palygorskite, hematite                         |
| S2007  | Iraq        | calcite, quartz                                                         | kaolinite, plagioclase, dolomite,                                               | amphibole, montmorillonite/chlorite, halite, palygorskite                                       |
| S2008  | Iraq        | quartz, calcite                                                         | gypsum, plagioclase, montmorillonite, K-feldspar                                | chlorite, muscovite (biotite), hematite                                                         |
| S2009  | Iraq        | quartz, calcite                                                         | plagioclase, gypsum, microcline, montmorillonite                                | chlorite, muscovite (biotite), hornblende, kaolinite, dolomite, augite, bassanite, palygorskite |



Supplement S2.2 – Mineralogy on <38 µm, Sieved Powders by XRD

| Sample | Locality    | Mineralogy (semi-quantitative) by XRD, on < 38 µm sieved soil fractions |                                                                         |                                                                                              |
|--------|-------------|-------------------------------------------------------------------------|-------------------------------------------------------------------------|----------------------------------------------------------------------------------------------|
|        | Country     | Major 20-100%                                                           | Minor 5-20%                                                             | Trace <5%                                                                                    |
| S2010  | Iraq        | quartz, calcite                                                         | plagioclase, montmorillonite, muscovite (biotite), microcline, chlorite | gypsum, hornblende, kaolinite, dolomite                                                      |
| S2011  | Iraq        | dolomite                                                                | calcite, gypsum, quartz                                                 | montmorillonite, muscovite (biotite), kaolinite, hematite, halite, plagioclase, palygorskite |
| S2012  | Kuwait      | quartz, calcite                                                         | plagioclase, montmorillonite, microcline, palygorskite                  | chlorite, dolomite, serpentine, hornblende, muscovite (biotite), gypsum                      |
| S2013  | Kuwait      | calcite, quartz                                                         | plagioclase, montmorillonite, illite, kaolinite                         | chlorite, microcline, muscovite (biotite), hornblende, hematite, gypsum, palygorskite        |
| S2014  | Kuwait      | quartz                                                                  | calcite, plagioclase, microcline                                        | muscovite (biotite), hornblende, kaolinite, chlorite, palygorskite, hematite                 |
| S2015  | Kuwait      | quartz                                                                  | calcite, montmorillonite, plagioclase, K-feldspar                       | chlorite, hornblende, serpentine, palygorskite, muscovite (biotite), amorphous               |
| S2016  | Afghanistan | quartz                                                                  | calcite, kaolinite, illite, orthoclase                                  | plagioclase, palygorskite, gypsum, dolomite, amphibole                                       |
| S2017  | Kuwait      | quartz, calcite                                                         | kaolinite, dolomite, illite, lizardite, K-feldspar, plagioclase         | palygorskite                                                                                 |
| S3003  | USA         | quartz, plagioclase                                                     | calcite, muscovite (biotite), kaolinite                                 | dolomite, montmorillonite/chlorite, gypsum                                                   |
| S3004  | USA         | quartz, calcite                                                         | plagioclase, muscovite (biotite)                                        | kaolinite, K-feldspar, dolomite                                                              |
| S3008  | USA         | quartz, plagioclase                                                     | muscovite (biotite), calcite, K-feldspar                                | kaolinite, amphibole, dolomite                                                               |
| S3011  | USA         | quartz, plagioclase                                                     | muscovite (biotite), dolomite, kaolinite                                | calcite                                                                                      |
| S3016  | USA         | quartz, dolomite                                                        | calcite, plagioclase, aragonite, muscovite (biotite)                    | K-feldspar, hematite                                                                         |
| S3017  | USA         | quartz, calcite                                                         | dolomite, plagioclase, aragonite                                        | muscovite (biotite), K-feldspar, hematite                                                    |

Supplement S2.3 – Particle Size Analysis of <600 µm Sieved Samples as Volume Percentages

| Sample | Country - Region                     | Locality                                             | Particle Size Analysis (Vol. %) |      |       |
|--------|--------------------------------------|------------------------------------------------------|---------------------------------|------|-------|
|        |                                      |                                                      | Sand                            | Silt | Clay  |
| S1005  | Spain - Las Canarias - Lanzarote     | La Mala                                              | 56.77                           | 31.1 | 12.09 |
| S1006  | Spain - Las Canarias - Lanzarote     | La Mala                                              | 84.88                           | 8.9  | 6.18  |
| S1007  | Spain - Las Canarias - Lanzarote     | Mirador del Rio                                      | 19.16                           | 67.8 | 13.08 |
| S1008  | Spain - Las Canarias - Lanzarote     | Vega de Femes                                        | 2.54                            | 69.1 | 28.40 |
| S1009  | Mali                                 | above Bamako                                         | 24.96                           | 48.4 | 26.66 |
| S1010  | Mali                                 | Bamako                                               | 32.68                           | 52.3 | 14.99 |
| S1011  | Mali                                 | West Bamako                                          | 24.62                           | 49.7 | 25.68 |
| S1013  | Cabo Verde                           | Ponta Fiúra, Sal Island                              | 52.21                           | 30.9 | 16.87 |
| S1014  | China                                | NW China, 500 km north of Taklamakan                 | 47.94                           | 27.9 | 24.19 |
| S1016  | China                                | NW China, 530 km north of Taklamakan                 | 9.75                            | 58.9 | 31.37 |
| S1017  | China                                | Daemon City, Xinjiang, 650 km north of Taklamakan    | 19.73                           | 71.3 | 8.93  |
| S1018  | China                                | Daemon City, Xinjiang, 650km north of Taklamakan     | 11.25                           | 61.5 | 27.29 |
| S1019  | USA                                  | Owens Lake, CA                                       | 56.70                           | 36.6 | 6.70  |
| S1022  | Namibia                              | Etosha, Fischer Pan                                  | 48.61                           | 37.6 | 13.83 |
| S1023  | Namibia                              | Etosha, Stinkwater                                   | 92.91                           | 5.9  | 1.23  |
| S1024  | Namibia                              | Etosha, Lookout                                      | 8.36                            | 51.7 | 39.92 |
| S1025  | Morocco                              | Lake Iriki                                           | 45.82                           | 40.5 | 13.67 |
| S1027  | Spain - Las Canarias - Gran Canaria  | Galdar                                               | 2.30                            | 86.3 | 11.44 |
| S1033  | Spain - Las Canarias - Fuerteventura | Fuerteventura, Pozo Negro, off road FV-420           | 19.60                           | 71.1 | 9.27  |
| S1034  | Spain - Las Canarias - Fuerteventura | Fuerteventura, Pozo Negro, off road FV-420           | 16.17                           | 71.8 | 12.07 |
| S1035  | Spain - Las Canarias - Fuerteventura | La Ampuyenta, off FV-20                              | 6.13                            | 77.0 | 16.88 |
| S1038  | Botswana                             | Makgadikgadi Pan                                     | 53.27                           | 40.6 | 6.17  |
| S1039  | Botswana                             | Makgadikgadi Pan                                     | 58.50                           | 35.5 | 5.96  |
| S1040  | Botswana                             | Nxai Pan                                             | 73.03                           | 24.5 | 2.44  |
| S1041  | Botswana                             | Nxai Pan                                             | 49.93                           | 46.3 | 3.80  |
| S1042  | Chile                                | Atacama, Yungay (Rock Garden)                        | 76.55                           | 16.8 | 6.65  |
| S1045  | USA                                  | Black Rock playa, Northern Nevada                    | 3.23                            | 59.4 | 37.37 |
| S1049  | Chad                                 | Bodélé Depression                                    | 11.40                           | 78.5 | 10.11 |
| S1050  | Chad                                 | Bodélé Depression                                    | 6.11                            | 81.3 | 12.64 |
| S1051  | Chad                                 | Bodélé Depression                                    | 0.62                            | 92.9 | 6.44  |
| S1052  | USA                                  | Peavine, hillside outcrop, white diatomaceous shale  | 13.42                           | 80.5 | 6.08  |
| S1053  | USA                                  | Peavine, sedimentary outcrop, yellow limonite soil   | 19.29                           | 62.0 | 18.69 |
| S1055  | China                                | Jiuzhoutai Mtn summit, 6.5 km NW of Lanzhou City     | 22.46                           | 70.0 | 7.55  |
| S1056  | Australia                            | Cooper Creek, Lake Eyre, South Australia             | 46.75                           | 36.2 | 17.05 |
| S1057  | Australia                            | Warburton River, Lake Eyre, South Australia          | 53.74                           | 20.1 | 26.09 |
| S1058  | Australia                            | Lake Frome, South Australia                          | 49.85                           | 38.6 | 11.57 |
| S1060  | Serbia                               | Batajnica, Danube                                    | 17.13                           | 73.5 | 9.36  |
| S1062  | Serbia                               | Kostolac, Lignite pit                                | 14.31                           | 75.9 | 9.75  |
| S1064  | Serbia                               | Stari Slankamen, Lowest Loess section                | 11.68                           | 77.6 | 10.75 |
| S2001  | Djibouti                             | Lemonière, Site 1                                    | 72.95                           | 23.5 | 3.51  |
| S2002  | Afghanistan                          | Bagram, Site 2                                       | 24.82                           | 62.2 | 13.02 |
| S2003  | Afghanistan                          | Khowsht (Salerno), Site 3                            | 29.54                           | 57.8 | 12.66 |
| S2004  | Qatar                                | Al Udeid Air Base (Abu Nahlah Airport), Site 4       | 72.91                           | 22.4 | 4.64  |
| S2005  | UAE                                  | Al Dhafra, Site 5                                    | 96.20                           | 2.9  | 0.93  |
| S2006  | Iraq                                 | Joint Base Balad (Anaconda), Site 6                  | 13.57                           | 64.6 | 21.86 |
| S2007  | Iraq                                 | Camp Victory, Site 7                                 | 14.21                           | 60.4 | 25.43 |
| S2008  | Iraq                                 | Tallil (Camp Adder), Site 8                          | 80.27                           | 17.8 | 1.91  |
| S2009  | Iraq                                 | Tikrit (Contingency Operating Base Speicher), Site 9 | 53.95                           | 38.4 | 7.67  |
| S2010  | Iraq                                 | Taji, Site 10                                        | 69.57                           | 24.3 | 6.17  |
| S2011  | Iraq                                 | Al Asad, Site 11                                     | 69.92                           | 21.5 | 8.60  |
| S2012  | Kuwait                               | Northern Kuwait (Camp Buehring), Site 12             | 75.70                           | 19.5 | 4.79  |
| S2013  | Kuwait                               | Central Kuwait (Camp Ali Al Salem), Site 13          | 69.00                           | 27.1 | 3.87  |
| S2014  | Kuwait                               | Coastal Kuwait (Ash Shu Ayabah), Site 14             | 87.28                           | 10.3 | 2.45  |
| S2015  | Kuwait                               | Southern Kuwait (Camp Arifjan), Site 15              | 88.13                           | 9.7  | 2.22  |
| S2016  | Afghanistan                          | Helmand Province (Camp Leatherneck), Site 16         | 55.33                           | 37.5 | 7.14  |
| S2017  | Kuwait                               | Coastal Kuwait (Ash Shu Ayabah), Site 17             | 37.13                           | 54.2 | 8.68  |
| S3003  | USA                                  | Yuma Proving Ground (YPG), AZ, Area 3835Z            | 44.19                           | 47.1 | 8.74  |
| S3004  | USA                                  | Yuma Proving Ground (YPG), AZ, 26500R                | 60.80                           | 33.5 | 5.66  |
| S3008  | USA                                  | Roadrunner, Yuma Proving Ground, Yuma, AZ            | 52.34                           | 38.5 | 9.20  |
| S3011  | USA                                  | Ft. Carson, CO                                       | 55.46                           | 35.7 | 8.79  |
| S3016  | USA                                  | Dugway Proving Ground, UT                            | 54.53                           | 34.2 | 11.22 |
| S3017  | USA                                  | Dugway Proving Ground, UT                            | 46.97                           | 39.2 | 13.86 |

Supplement S3.1 – Color Indices, Single Scattering Albedos

| Sample | Color                 | Munsell Color Index |              | Single Scattering Albedo SSA) |                |              |
|--------|-----------------------|---------------------|--------------|-------------------------------|----------------|--------------|
|        |                       | Hue                 | Value/Chroma | 405 nm (blue)                 | 532 nm (green) | 781 nm (red) |
| S1000  | Red                   | 10R                 | 4/8          | 0.407                         | 0.487          | 0.976        |
| S1005  | Light brown           | 7.5YR               | 6/4          | 0.943                         | 0.986          | 0.998        |
| S1006  | Very pale brown       | 10YR                | 7/3          | 0.964                         | 0.992          | 0.999        |
| S1007  | Light reddish brown   | 5YR                 | 6/4          | 0.936                         | 0.982          | 0.998        |
| S1008  | Strong brown          | 7.5YR               | 4/4          | 0.868                         | 0.963          | 0.995        |
| S1009  | Reddish brown         | 5YR                 | 4/4          | 0.722                         | 0.907          | 0.991        |
| S1010  | Reddish brown         | 5YR                 | 4/3          | 0.729                         | 0.889          | 0.981        |
| S1011  | Dusky red             | 2.5YR               | 4/4          | 0.689                         | 0.876          | 0.988        |
| S1013  | Light brown           | 7.5YR               | 6/4          | 0.925                         | 0.982          | 0.997        |
| S1014  | Light brownish gray   | 10YR                | 6/2          | 0.954                         | 0.991          | 0.997        |
| S1016  | Pale brown            | 10YR                | 6/3          | 0.936                         | 0.985          | 0.997        |
| S1017  | Weak red              | 2.5Y                | 6/3          | 0.955                         | 0.991          | 0.996        |
| S1018  | Pinkish gray          | 5YR                 | 7/2          | 0.953                         | 0.993          | 0.997        |
| S1019  | Pinkish gray          | 5YR                 | 6/2          | 0.948                         | 0.988          | 0.995        |
| S1022  | White                 | 2.5Y                | 8/1          | 0.991                         | 0.997          | 0.999        |
| S1023  | White                 | 2.5Y                | 8/1          | 0.984                         | 0.993          | 0.997        |
| S1024  | White                 | 2.5Y                | 8/1          | 0.989                         | 0.996          | 0.999        |
| S1025  | Brown                 | 7.5Y                | 5/4          | 0.905                         | 0.975          | 0.996        |
| S1027  | Reddish brown         | 5YR                 | 5/3          | 0.958                         | 0.987          | 0.998        |
| S1033  | Brown                 | 7.5YR               | 5/4          | 0.875                         | 0.969          | 0.995        |
| S1034  | Brown                 | 7.5YR               | 5/4          | 0.866                         | 0.965          | 0.995        |
| S1035  | Yellowish red         | 5YR                 | 4/6          | 0.916                         | 0.979          | 0.997        |
| S1038  | Gray                  | 10YR                | 6/1          | 0.945                         | 0.975          | 0.994        |
| S1039  | Light brownish gray   | 10YR                | 6/2          | 0.965                         | 0.987          | 0.997        |
| S1040  | Light gray            | 2.5Y                | 7/1          | 0.984                         | 0.994          | 0.998        |
| S1041  | Grayish brown         | 10YR                | 5/2          | 0.962                         | 0.981          | 0.995        |
| S1042  | Pinkish gray          | 7.5YR               | 7/2          | 0.945                         | 0.986          | 0.998        |
| S1045  | Light gray            | 2.5Y                | 7/2          | 0.970                         | 0.994          | 0.998        |
| S1049  | White                 | 2.5Y                | 8/1          | 0.982                         | 0.995          | 0.999        |
| S1050  | White                 | 2.5Y                | 8/1          | 0.982                         | 0.995          | 0.999        |
| S1051  | Light gray            | 10YR                | 7/2          | 0.972                         | 0.991          | 0.998        |
| S1052  | White                 | 10YR                | 8/1          | 0.982                         | 0.995          | 0.999        |
| S1053  | Yellowish brown       | 10YR                | 5/4          | 0.923                         | 0.989          | 0.998        |
| S1055  | Pale brown            | 10YR                | 6/3          | 0.912                         | 0.978          | 0.995        |
| S1056  | Light brownish gray   | 2.5Y                | 6/2          | 0.969                         | 0.992          | 0.998        |
| S1057  | Pale brown            | 10YR                | 6/3          | 0.965                         | 0.991          | 0.998        |
| S1058  | Strong brown          | 7.5YR               | 5/6          | 0.870                         | 0.962          | 0.992        |
| S1060  | Light yellowish brown | 10YR                | 6/4          | 0.868                         | 0.974          | 0.996        |
| S1062  | Light yellowish brown | 10YR                | 6/4          | 0.893                         | 0.981          | 0.996        |
| S1064  | Light yellowish brown | 10YR                | 6/4          | 0.887                         | 0.979          | 0.997        |
| S1065  | Yellowish red         | 5YR                 | 5/6          | 0.629                         | 0.864          | 0.991        |
| S1066  | White                 | 7.5YR               | 8/1          | 0.957                         | 0.983          | 0.994        |
| S2001  | Brown                 | 7.5YR               | 4/3          | 0.871                         | 0.963          | 0.995        |
| S2002  | Pale brown            | 10YR                | 6/3          | 0.848                         | 0.952          | 0.993        |
| S2003  | Grayish brown         | 10YR                | 5/2          | 0.902                         | 0.973          | 0.992        |
| S2004  | Very pale brown       | 10YR                | 7/3          | 0.932                         | 0.984          | 0.997        |
| S2005  | Very pale brown       | 10YR                | 7/3          | 0.971                         | 0.992          | 0.998        |
| S2006  | Yellowish brown       | 10YR                | 5/4          | 0.913                         | 0.977          | 0.995        |
| S2007  | Pale brown            | 10YR                | 6/3          | 0.935                         | 0.982          | 0.996        |
| S2008  | Very pale brown       | 10YR                | 7/3          | 0.958                         | 0.988          | 0.997        |
| S2009  | Light yellowish brown | 10YR                | 6/4          | 0.919                         | 0.979          | 0.996        |
| S2010  | Dark yellowish brown  | 10YR                | 4/4          | 0.908                         | 0.973          | 0.995        |
| S2011  | Very pale brown       | 10YR                | 8/1          | 0.948                         | 0.988          | 0.997        |
| S2012  | Very pale brown       | 10YR                | 7/3          | 0.941                         | 0.984          | 0.997        |
| S2013  | Pale brown            | 10YR                | 6/3          | 0.939                         | 0.983          | 0.996        |
| S2014  | Very pale brown       | 10YR                | 7/3          | 0.942                         | 0.983          | 0.994        |
| S2015  | Very pale brown       | 10YR                | 7/3          | 0.960                         | 0.989          | 0.997        |
| S2016  | Light yellowish brown | 10YR                | 6/4          | 0.928                         | 0.982          | 0.996        |
| S2017  | Pinkish gray          | 7.5YR               | 6/2          | 0.914                         | 0.973          | 0.988        |
| S3003  | Light brown           | 7.5YR               | 6/3          | 0.944                         | 0.986          | 0.997        |
| S3004  | Light brown           | 7.5YR               | 6/4          | 0.940                         | 0.986          | 0.998        |
| S3008  | Light brown           | 7.5YR               | 6/4          | 0.930                         | 0.981          | 0.997        |
| S3011  | Brown                 | 10YR                | 5/3          | 0.906                         | 0.975          | 0.994        |
| S3016  | White                 | 10YR                | 8/1          | 0.969                         | 0.991          | 0.998        |
| S3017  | White                 | 10YR                | 8/1          | 0.972                         | 0.992          | 0.998        |

**Sample S1000, Pure Hematite (Fe<sub>2</sub>O<sub>3</sub>)**

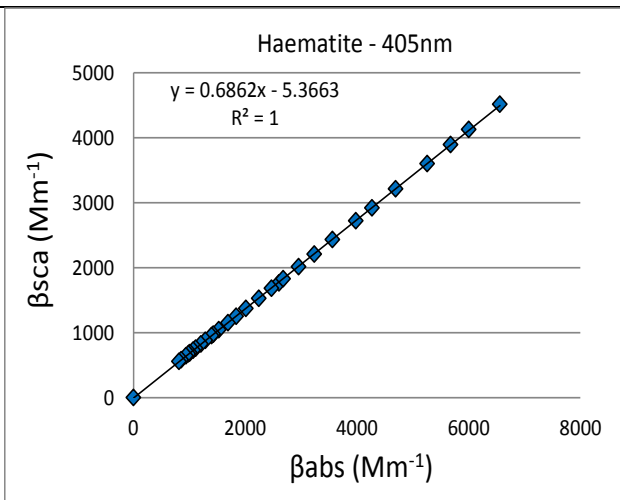

**SSA (405nm) = 0.407**

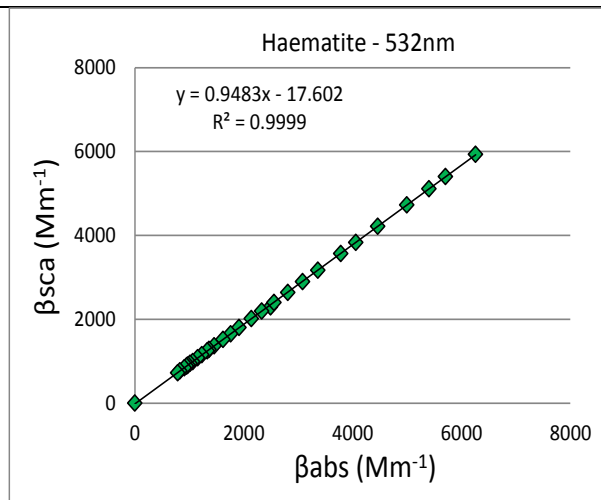

**SSA (532nm) = 0.487**

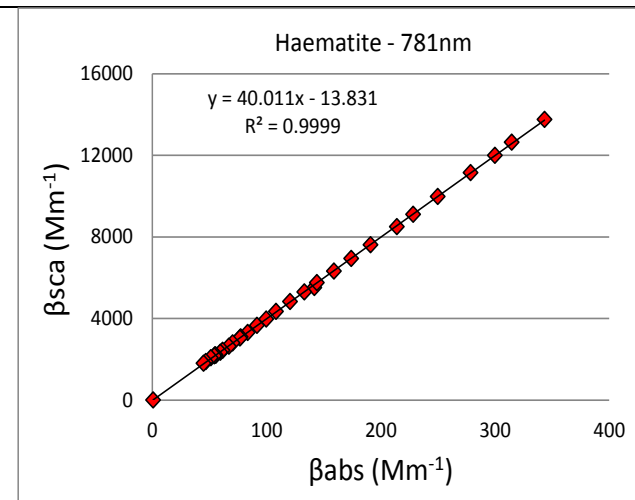

**SSA (781nm) = 0.976**

Optical scattering, absorption and single scattering albedos (SSA) at three wavelengths, where  $SSA = 1/(1 + 1/m)$  and  $m$  is the slope of the above plots.

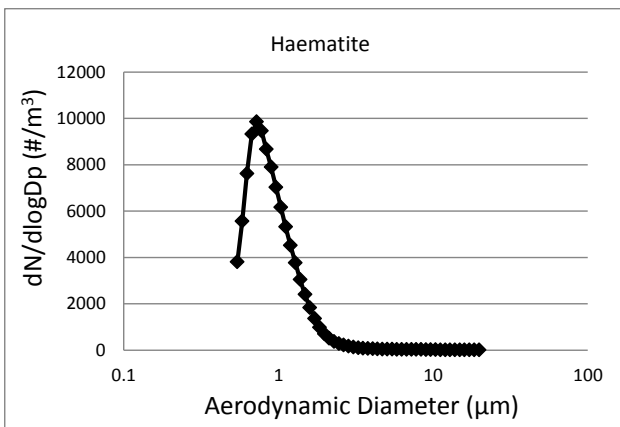

| Median<br>( $\mu\text{m}$ ) | Mean<br>( $\mu\text{m}$ ) | Geo. Mean<br>( $\mu\text{m}$ ) | Mode<br>( $\mu\text{m}$ ) | Geo. Std. Dev.<br>( $\mu\text{m}$ ) |
|-----------------------------|---------------------------|--------------------------------|---------------------------|-------------------------------------|
| 0.8441                      | 0.9556                    | 0.8927                         | 0.7234                    | 1.4052                              |

| <b>Teflon Filters</b>               |        |        |       |       |
|-------------------------------------|--------|--------|-------|-------|
|                                     | PM10   | PM10   | PM2.5 | PM2.5 |
| Mass ( $\mu\text{g}$ )              | 620    | 610    | 570   | 600   |
| PM <sub>2.5</sub> /PM <sub>10</sub> | 0.92   | 0.97   | 0.93  | 0.98  |
| Average                             | 0.95   |        |       |       |
| <b>Betagaugue</b>                   |        |        |       |       |
|                                     | PM2.5  | PM10   |       |       |
| Mass ( $\mu\text{g}/\text{m}^3$ )   | 1173.9 | 1369.9 |       |       |
| PM <sub>2.5</sub> /PM <sub>10</sub> | 0.86   |        |       |       |

Particle size distribution for PM<sub>2.5</sub>, as well as Teflon filter and beta gauge mass measurements, together with PM<sub>2.5</sub>/PM<sub>10</sub> mass ratios.

**Sample S1005, Spain (Lanzarote, La Mala)**

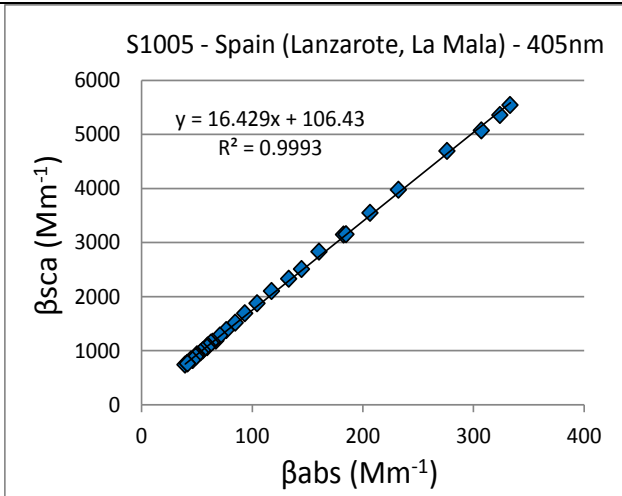

**SSA (405nm) = 0.943**

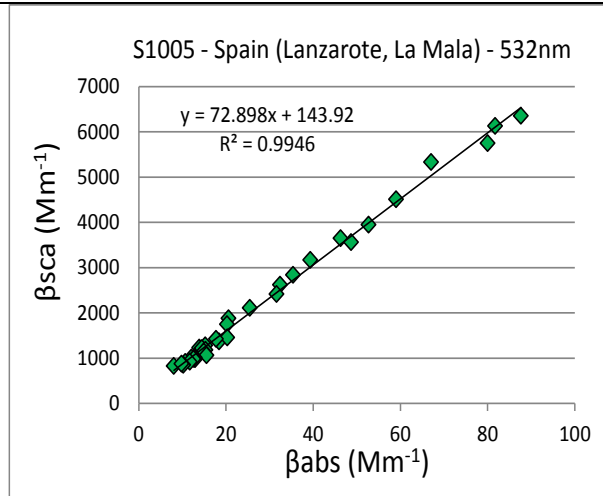

**SSA (532nm) = 0.986**

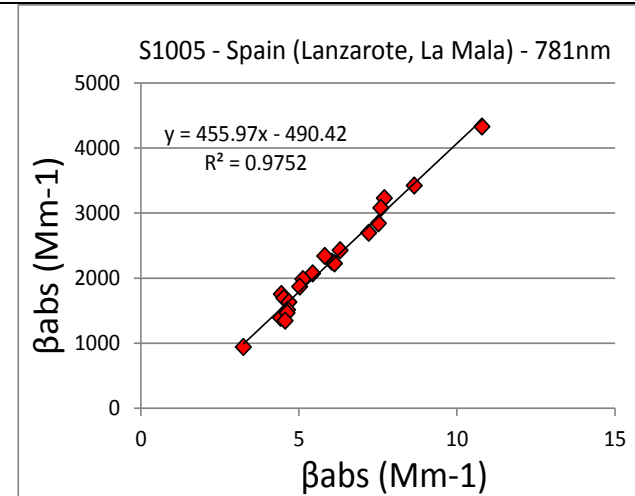

**SSA (781nm) = 0.998**

Optical scattering, absorption and single scattering albedos (SSA) at three wavelengths, where  $SSA = 1/(1 + 1/m)$  and  $m$  is the slope of the above plots.

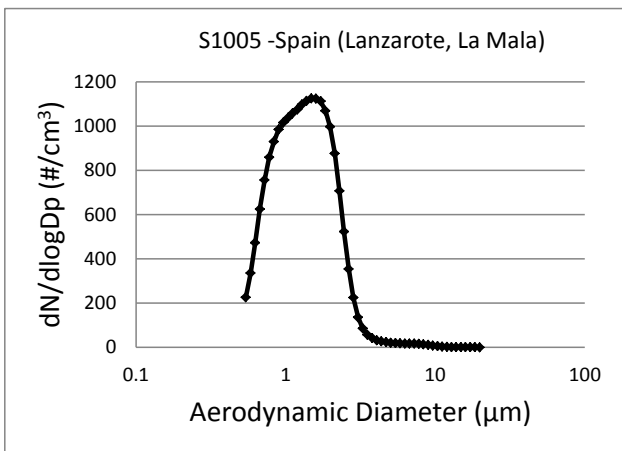

| Median<br>( $\mu\text{m}$ ) | Mean<br>( $\mu\text{m}$ ) | Geo. Mean<br>( $\mu\text{m}$ ) | Mode<br>( $\mu\text{m}$ ) | Geo. Std. Dev.<br>( $\mu\text{m}$ ) |
|-----------------------------|---------------------------|--------------------------------|---------------------------|-------------------------------------|
| 1.293                       | 1.430                     | 1.291                          | 1.483                     | 1.550                               |

| Teflon Filters                      |       |      |        |       |
|-------------------------------------|-------|------|--------|-------|
|                                     | PM10  | PM10 | PM2.5  | PM2.5 |
| Mass ( $\mu\text{g}$ )              | 7310  | 6560 | 1130   | 1140  |
| PM <sub>2.5</sub> /PM <sub>10</sub> | 0.15  | 0.16 | 0.17   | 0.17  |
| Average                             | 0.16  |      |        |       |
| Betagauge                           |       |      |        |       |
|                                     | PM2.5 |      | PM10   |       |
| Mass ( $\mu\text{g}/\text{m}^3$ )   | 651.2 |      | 4531.4 |       |
| PM <sub>2.5</sub> /PM <sub>10</sub> | 0.14  |      |        |       |

| SEM Measured Aspect Ratio |                     |       |       |           |
|---------------------------|---------------------|-------|-------|-----------|
| Sample #                  | Number of Particles | Min   | Max   | Geom Mean |
| <b>S1005</b>              | 1395                | 1.000 | 3.754 | 1.456     |

Particle size distribution for PM<sub>2.5</sub>, as well as Teflon filter and betagauge mass measurements, together with PM<sub>2.5</sub>/PM<sub>10</sub> ratios.

**Sample S1006, Spain (La Mala, Lanzarote, Canary Islands)**

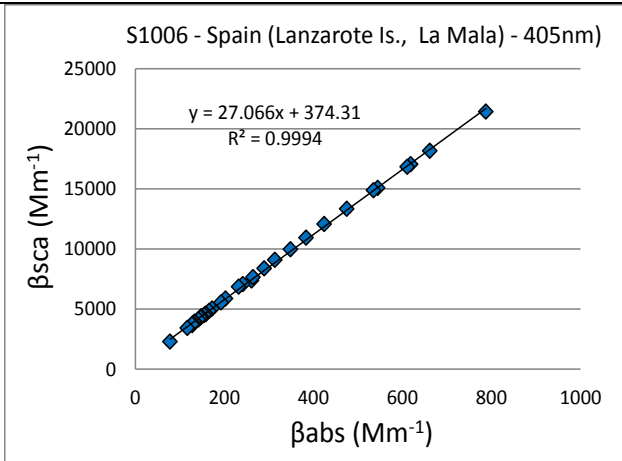

**SSA (405nm) = 0.964**

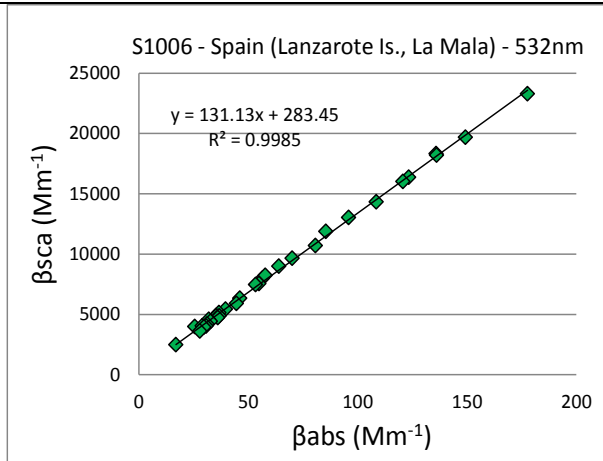

**SSA (532nm) = 0.992**

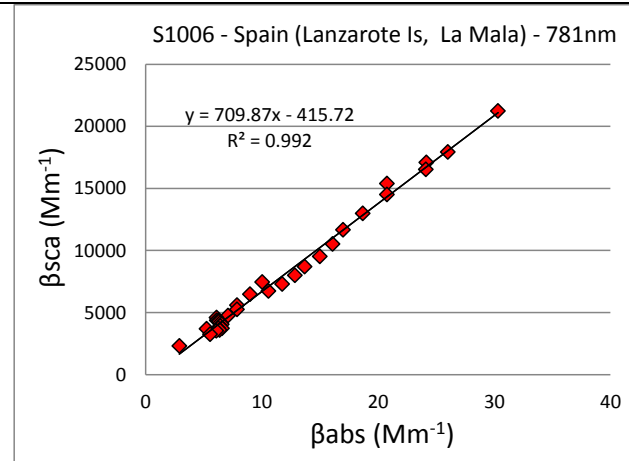

**SSA (781nm) = 0.999**

Optical scattering, absorption and single scattering albedos (SSA) at three wavelengths, where  $SSA = 1/(1 + 1/m)$  and  $m$  is the slope of the above plots.

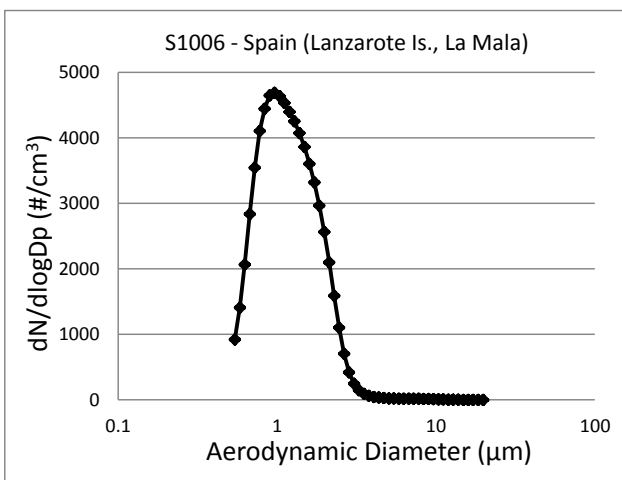

| Median<br>( $\mu\text{m}$ ) | Mean<br>( $\mu\text{m}$ ) | Geo. Mean<br>( $\mu\text{m}$ ) | Mode<br>( $\mu\text{m}$ ) | Geo. Std. Dev.<br>( $\mu\text{m}$ ) |
|-----------------------------|---------------------------|--------------------------------|---------------------------|-------------------------------------|
| 1.128                       | 1.261                     | 1.158                          | 0.953                     | 1.493                               |

| <u>Teflon Filters</u>               |       |        |       |       |
|-------------------------------------|-------|--------|-------|-------|
|                                     | PM10  | PM10   | PM2.5 | PM2.5 |
| Mass ( $\mu\text{g}$ )              | 11590 | 10580  | 2870  | 2960  |
| PM <sub>2.5</sub> /PM <sub>10</sub> | 0.25  | 0.26   | 0.27  | 0.28  |
| Average                             | 0.26  |        |       |       |
| <u>Betagaugue</u>                   |       |        |       |       |
|                                     | PM2.5 | PM10   |       |       |
| Mass ( $\mu\text{g}/\text{m}^3$ )   | 411.6 | 1396.8 |       |       |
| PM <sub>2.5</sub> /PM <sub>10</sub> | 0.29  |        |       |       |

**SEM Measured Aspect Ratio**

| Sample #     | Number of Particles | Min   | Max   | Geom Mean |
|--------------|---------------------|-------|-------|-----------|
| <b>S1006</b> | 1349                | 1.000 | 3.875 | 1.457     |

Particle size distribution for PM<sub>2.5</sub>, as well as Teflon filter and betagaugue mass measurements, together with PM<sub>2.5</sub>/PM<sub>10</sub> ratios.

**Sample S1007, Spain (Mirador del Rio, Lanzarote, Canary Islands)**

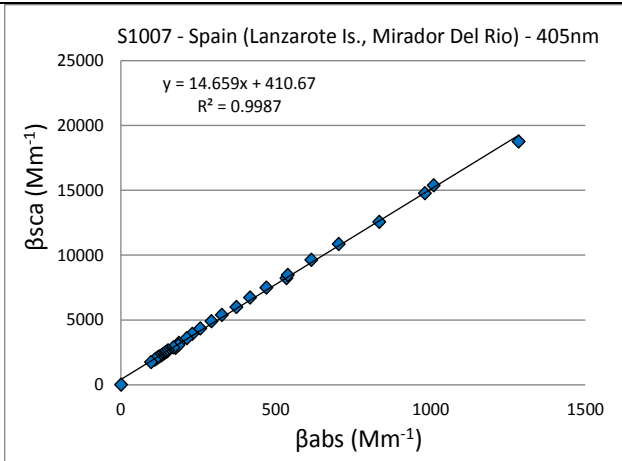

**SSA (405nm) = 0.936**

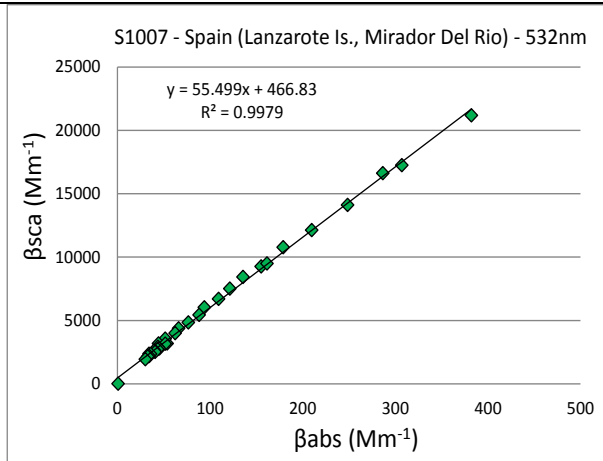

**SSA (532nm) = 0.982**

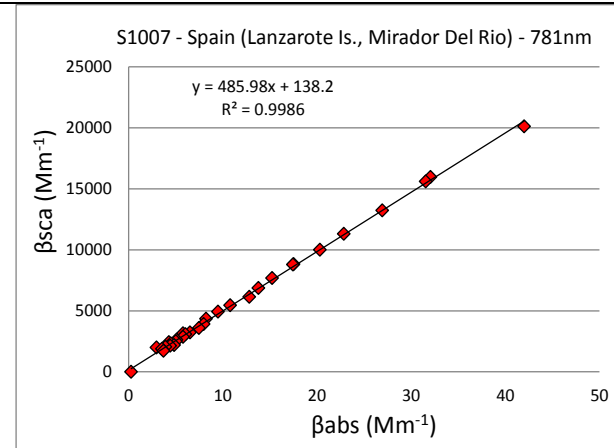

**SSA (781nm) = 0.998**

Optical scattering, absorption and single scattering albedos (SSA) at three wavelengths, where  $SSA = 1/(1 + 1/m)$  and  $m$  is the slope of the above plots.

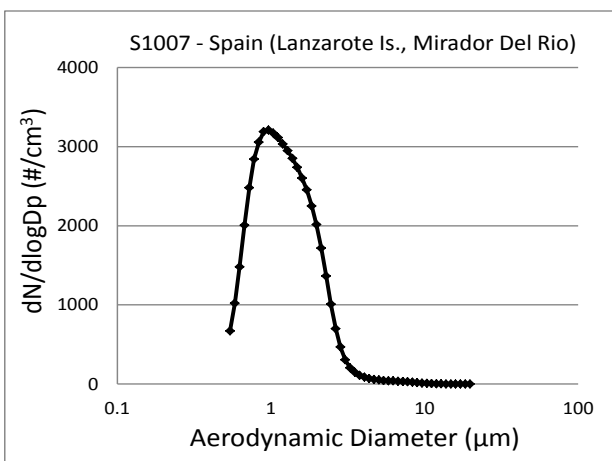

| Median            | Mean              | Geo. Mean         | Mode              | Geo. Std. Dev.    |
|-------------------|-------------------|-------------------|-------------------|-------------------|
| ( $\mu\text{m}$ ) |
| 1.162             | 1.323             | 1.197             | 0.957             | 1.535             |

| <u>Teflon Filters</u>               |        |         |       |       |
|-------------------------------------|--------|---------|-------|-------|
|                                     | PM10   | PM10    | PM2.5 | PM2.5 |
| Mass ( $\mu\text{g}$ )              | 10710  | 9750    | 2230  | 2210  |
| PM <sub>2.5</sub> /PM <sub>10</sub> | 0.21   | 0.21    | 0.23  | 0.23  |
| Average                             | 0.22   |         |       |       |
| <u>Betagaugue</u>                   |        |         |       |       |
|                                     | PM2.5  | PM10    |       |       |
| Mass ( $\mu\text{g}/\text{m}^3$ )   | 2164.5 | 10869.1 |       |       |
| PM <sub>2.5</sub> /PM <sub>10</sub> | 0.20   |         |       |       |

**SEM Measured Aspect Ratio**

| Sample #     | Number of Particles | Min   | Max   | Geom Mean |
|--------------|---------------------|-------|-------|-----------|
| <b>S1007</b> | 1417                | 1.000 | 4.142 | 1.489     |

Particle size distribution for PM<sub>2.5</sub>, as well as Teflon filter and betagaugue mass measurements, together with PM<sub>2.5</sub>/PM<sub>10</sub> ratios.

**Sample S1008, Spain (Lanzarote, Vega De Femes)**

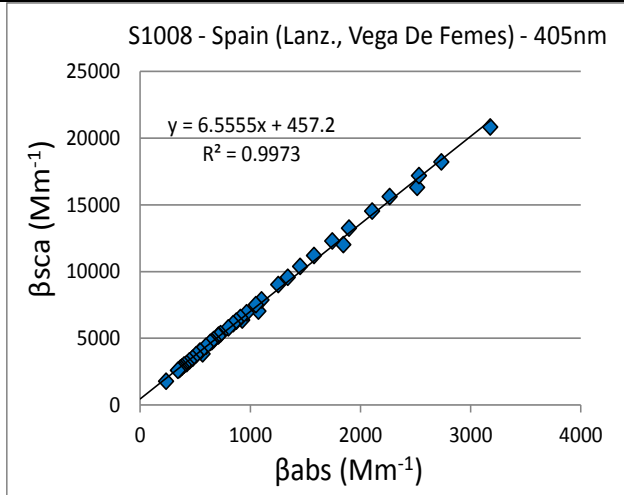

**SSA (405nm) = 0.868**

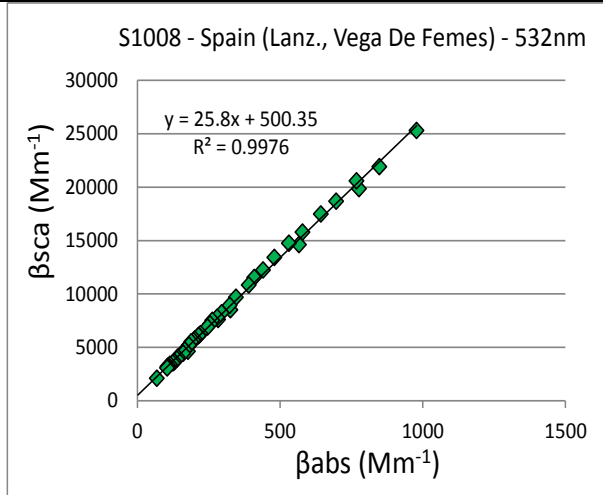

**SSA (532nm) = 0.963**

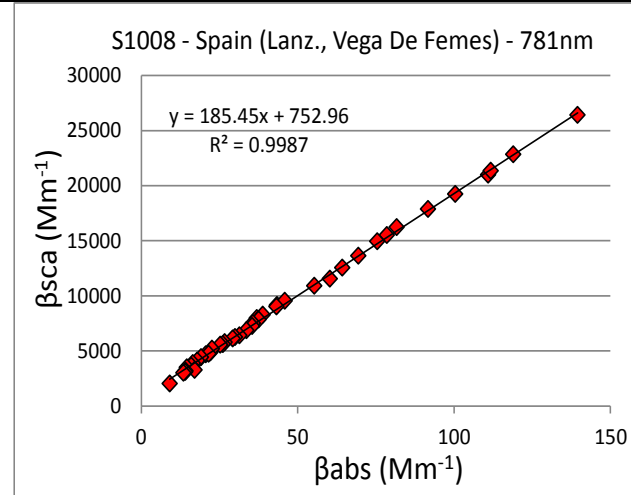

**SSA (781nm) = 0.995**

Optical scattering, absorption and single scattering albedos (SSA) at three wavelengths, where  $SSA = 1/(1 + 1/m)$  and  $m$  is the slope of the above plots.

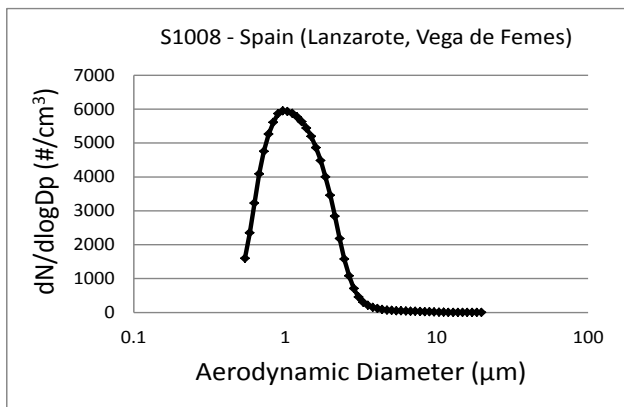

| Median<br>( $\mu\text{m}$ ) | Mean<br>( $\mu\text{m}$ ) | Geo. Mean<br>( $\mu\text{m}$ ) | Mode<br>( $\mu\text{m}$ ) | Geo. Std. Dev.<br>( $\mu\text{m}$ ) |
|-----------------------------|---------------------------|--------------------------------|---------------------------|-------------------------------------|
| 1.143                       | 1.291                     | 1.172                          | 0.972                     | 1.529                               |

| Teflon Filters                      |       |       |       |       |
|-------------------------------------|-------|-------|-------|-------|
|                                     | PM10  | PM10  | PM2.5 | PM2.5 |
| Mass ( $\mu\text{g}$ )              | 5140  | 4580  | 1380  | 1350  |
| PM <sub>2.5</sub> /PM <sub>10</sub> | 0.27  | 0.30  | 0.26  | 0.29  |
| Average                             | 0.28  |       |       |       |
| Betagauge                           |       |       |       |       |
|                                     | PM2.5 | PM10  |       |       |
| Mass ( $\mu\text{g}/\text{m}^3$ )   | 300.2 | 888.2 |       |       |
| PM <sub>2.5</sub> /PM <sub>10</sub> | 0.34  |       |       |       |

| SEM Measured Aspect Ratio |                     |       |       |           |
|---------------------------|---------------------|-------|-------|-----------|
| Sample #                  | Number of Particles | Min   | Max   | Geom Mean |
| <b>S1008</b>              | 1396                | 1.000 | 5.286 | 1.460     |

Particle size distribution for PM<sub>2.5</sub>, as well as Teflon filter and betagauge mass measurements, together with PM<sub>2.5</sub>/PM<sub>10</sub> ratios.



**Sample S1009, Mali (above Bamako)**

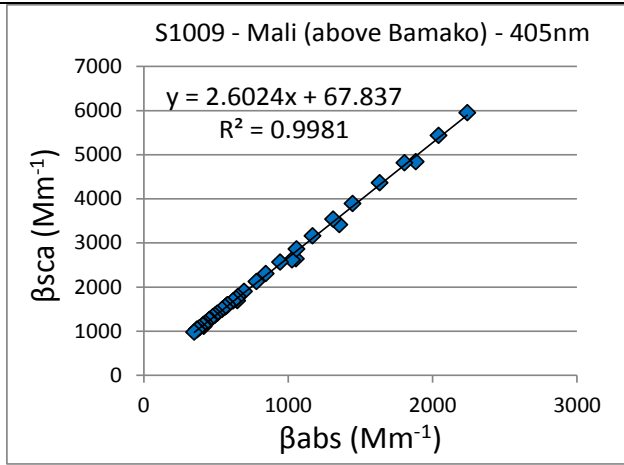

**SSA (405nm) = 0.722**

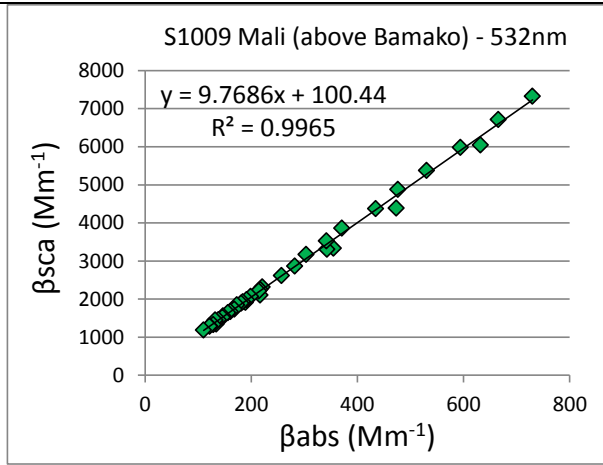

**SSA (532nm) = 0.907**

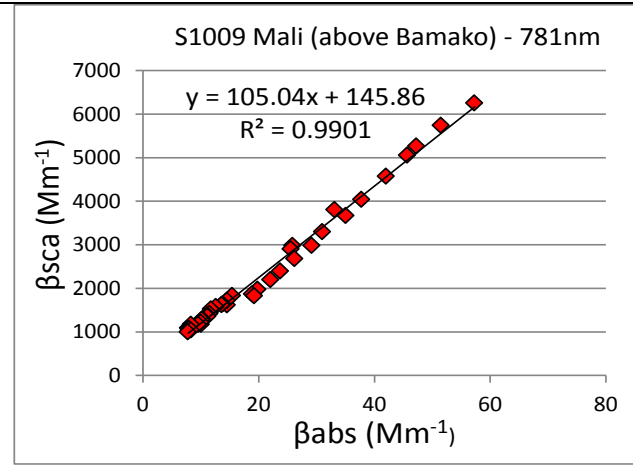

**SSA (781nm) = 0.991**

Optical scattering, absorption and single scattering albedos (SSA) at three wavelengths, where  $SSA = 1/(1 + 1/m)$  and  $m$  is the slope of the above plots.

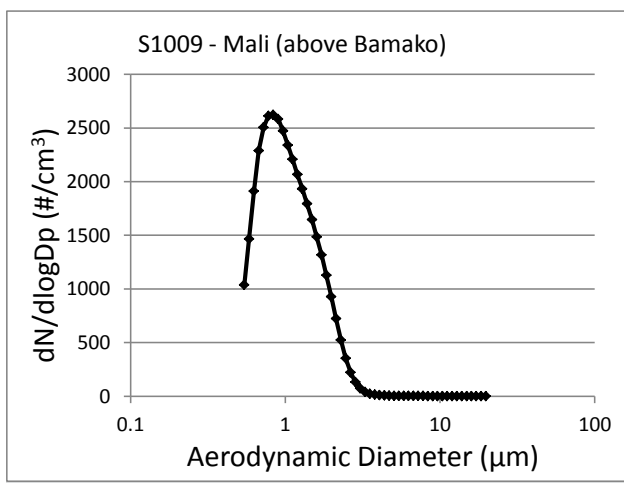

| Median            | Mean              | Geo. Mean         | Mode              | Geo. Std. Dev.    |
|-------------------|-------------------|-------------------|-------------------|-------------------|
| ( $\mu\text{m}$ ) |
| 0.994             | 1.125             | 1.037             | 0.856             | 1.482             |

|                                     | <u>Teflon Filters</u> |             |              |              |
|-------------------------------------|-----------------------|-------------|--------------|--------------|
|                                     | <u>PM10</u>           | <u>PM10</u> | <u>PM2.5</u> | <u>PM2.5</u> |
| Mass ( $\mu\text{g}$ )              | 4100                  | 3240        | 1330         | 1300         |
| PM <sub>2.5</sub> /PM <sub>10</sub> | 0.32                  | 0.32        | 0.41         | 0.40         |
| Average                             | 0.36                  |             |              |              |
|                                     | <u>Betagaugue</u>     |             |              |              |
|                                     | <u>PM2.5</u>          |             | <u>PM10</u>  |              |
| Mass ( $\mu\text{g}/\text{m}^3$ )   | 534                   |             | 1447         |              |
| PM <sub>2.5</sub> /PM <sub>10</sub> | 0.37                  |             |              |              |

| <u>SEM Measured Aspect Ratio</u> |                  |            |            |             |
|----------------------------------|------------------|------------|------------|-------------|
| <u>Sample #</u>                  | <u>Number of</u> | <u>Min</u> | <u>Max</u> | <u>Geom</u> |
|                                  | <u>Particles</u> |            |            | <u>Mean</u> |
| <b>S1009</b>                     | 1263             | 1.000      | 5.300      | 1.507       |

Particle size distribution for PM<sub>2.5</sub>, as well as Teflon filter and betagaugue mass measurements, together with PM<sub>2.5</sub>/PM<sub>10</sub> ratios.

**Sample S1010, Mali (Bamako)**

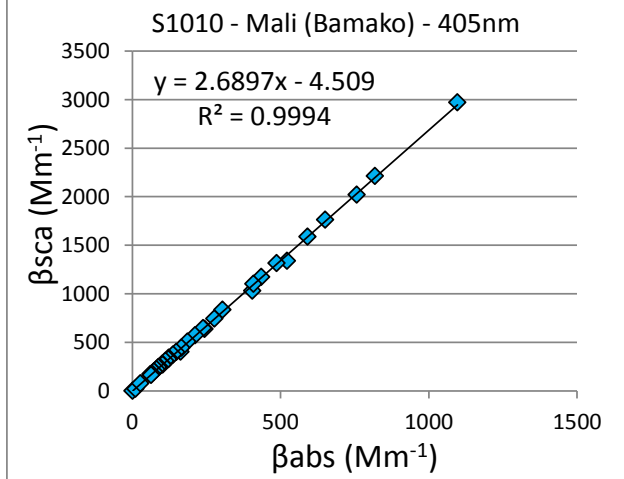

**SSA (405nm) = 0.729**

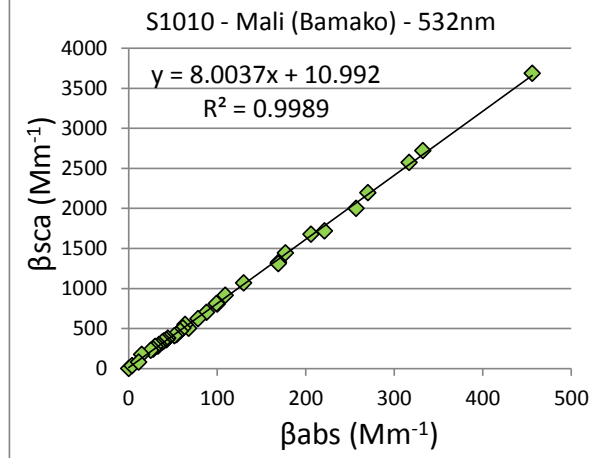

**SSA (532nm) = 0.889**

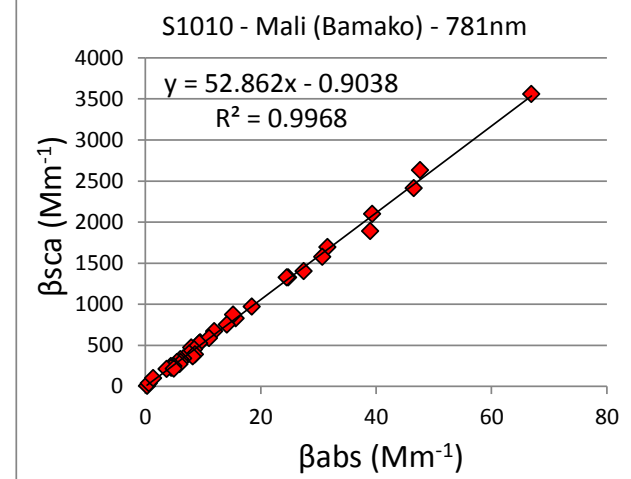

**SSA (781nm) = 0.981**

Optical scattering, absorption and single scattering albedos (SSA) at three wavelengths, where  $SSA = 1/(1 + 1/m)$  and  $m$  is the slope of the above plots.

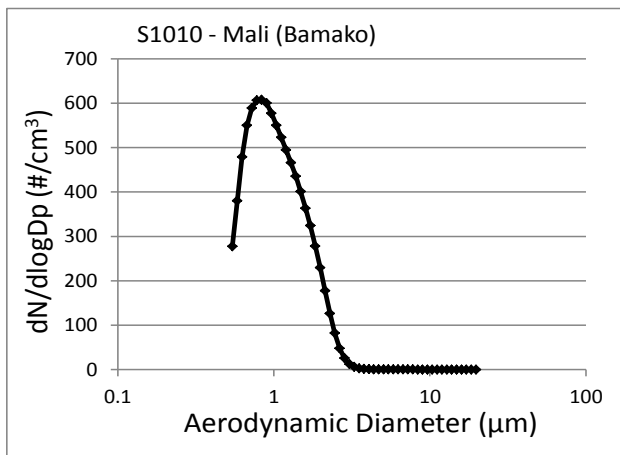

| Median            | Mean              | Geo. Mean         | Mode              | Geo. Std. Dev.    |
|-------------------|-------------------|-------------------|-------------------|-------------------|
| ( $\mu\text{m}$ ) |
| 1.004             | 1.128             | 1.041             | 0.849             | 1.481             |

| <u>Teflon Filters</u>               |              |             |              |              |
|-------------------------------------|--------------|-------------|--------------|--------------|
|                                     | <u>PM10</u>  | <u>PM10</u> | <u>PM2.5</u> | <u>PM2.5</u> |
| Mass ( $\mu\text{g}$ )              | 1350         | 1090        | 380          | 340          |
| PM <sub>2.5</sub> /PM <sub>10</sub> | 0.28         | 0.25        | 0.35         | 0.31         |
| Average                             | 0.30         |             |              |              |
| <u>Betagaugue</u>                   |              |             |              |              |
|                                     | <u>PM2.5</u> |             | <u>PM10</u>  |              |
| Mass ( $\mu\text{g}/\text{m}^3$ )   | 514          |             | 1339         |              |
| PM <sub>2.5</sub> /PM <sub>10</sub> | 0.38         |             |              |              |

**SEM Measured Aspect Ratio**

| <u>Sample #</u> | <u>Number of Particles</u> | <u>Min</u> | <u>Max</u> | <u>Geom Mean</u> |
|-----------------|----------------------------|------------|------------|------------------|
| <b>S1010</b>    | 1275                       | 1.004      | 3.922      | 1.469            |

Particle size distribution for PM<sub>2.5</sub>, as well as Teflon filter and betagaugue mass measurements, together with PM<sub>2.5</sub>/PM<sub>10</sub> ratios.

**Sample S1011, Mali (West Bamako)**

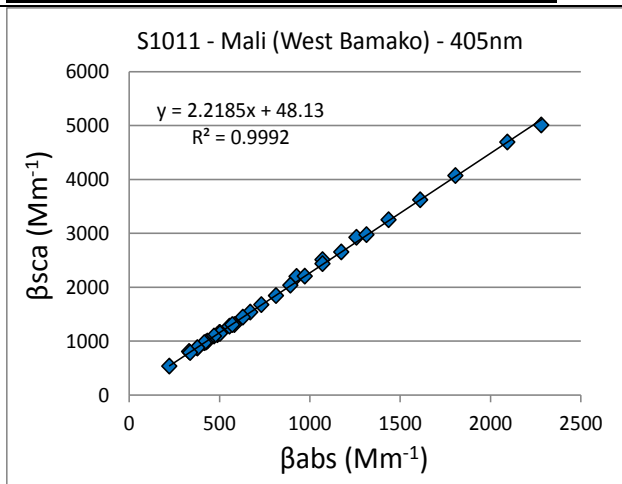

**SSA (405nm) = 0.689**

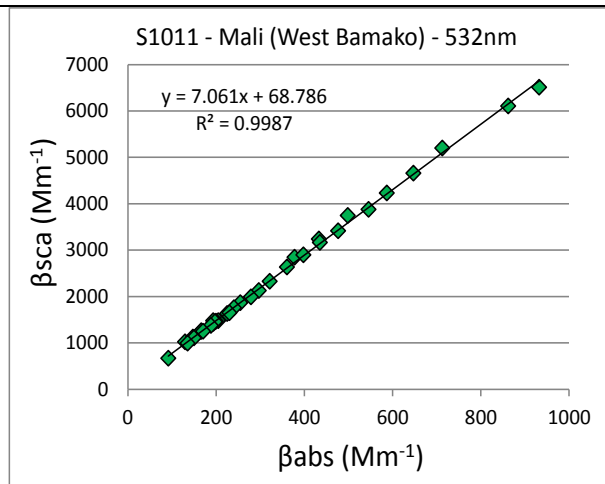

**SSA (532nm) = 0.876**

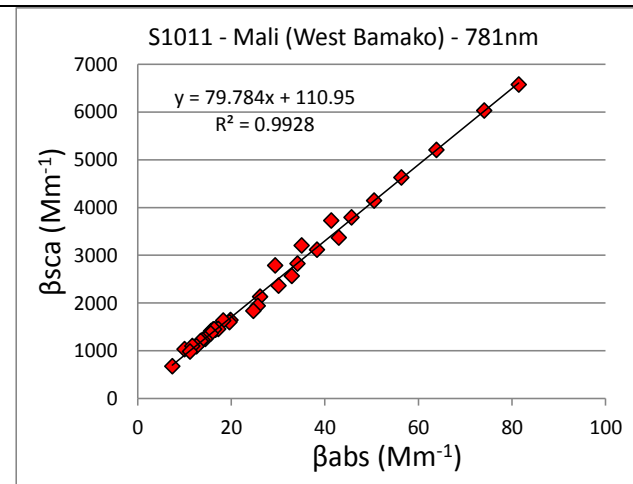

**SSA (781nm) = 0.988**

Optical scattering, absorption and single scattering albedos (SSA) at three wavelengths, where  $SSA = 1/(1 + 1/m)$  and  $m$  is the slope of the above plots.

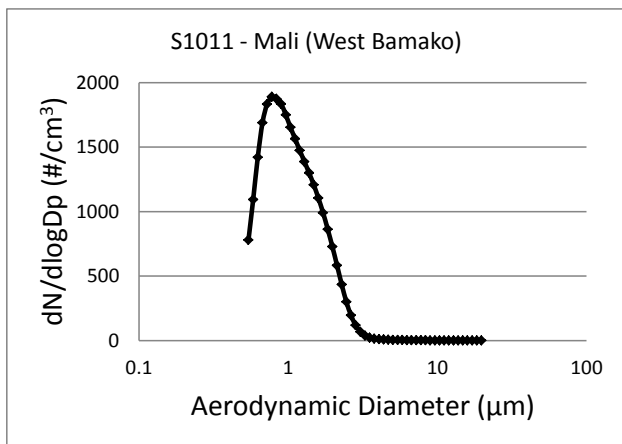

| Median<br>( $\mu\text{m}$ ) | Mean<br>( $\mu\text{m}$ ) | Geo. Mean<br>( $\mu\text{m}$ ) | Mode<br>( $\mu\text{m}$ ) | Geo. Std. Dev.<br>( $\mu\text{m}$ ) |
|-----------------------------|---------------------------|--------------------------------|---------------------------|-------------------------------------|
| 0.996                       | 1.140                     | 1.045                          | 0.789                     | 1.499                               |

| Teflon Filters                      |       |        |       |       |
|-------------------------------------|-------|--------|-------|-------|
|                                     | PM10  | PM10   | PM2.5 | PM2.5 |
| Mass ( $\mu\text{g}$ )              | 2510  | 2210   | 800   | 820   |
| PM <sub>2.5</sub> /PM <sub>10</sub> | 0.32  | 0.33   | 0.36  | 0.37  |
| Average                             | 0.34  |        |       |       |
| Betagauge                           |       |        |       |       |
|                                     | PM2.5 | PM10   |       |       |
| Mass ( $\mu\text{g}/\text{m}^3$ )   | 409.9 | 1213.8 |       |       |
| PM <sub>2.5</sub> /PM <sub>10</sub> | 0.34  |        |       |       |

**SEM Measured Aspect Ratio**

| Sample #     | Number of Particles | Min   | Max   | Geom Mean |
|--------------|---------------------|-------|-------|-----------|
| <b>S1011</b> | 1353                | 1.000 | 5.014 | 1.460     |

Particle size distribution for PM<sub>2.5</sub>, as well as Teflon filter and betagauge mass measurements, together with PM<sub>2.5</sub>/PM<sub>10</sub> ratios.

**Sample S1013, Cape Verde (Punta Fiure)**

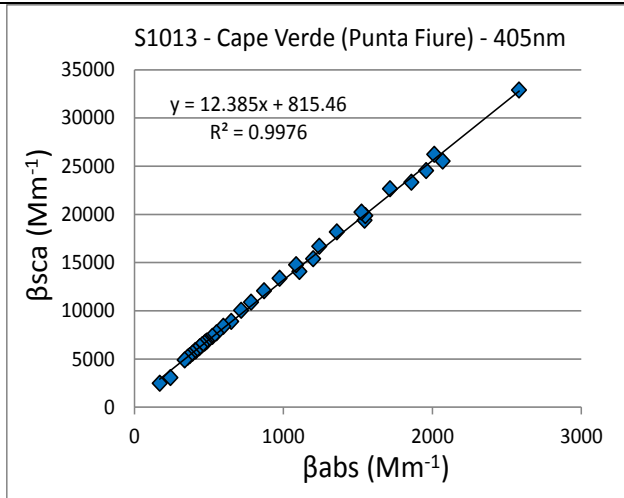

**SSA (405nm) = 0.925**

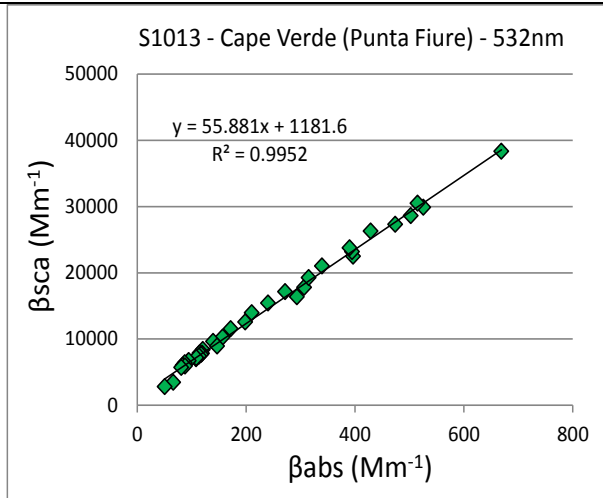

**SSA (532nm) = 0.982**

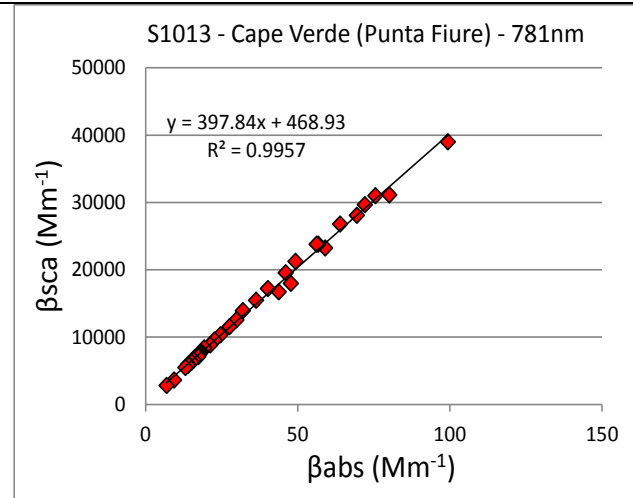

**SSA (781nm) = 0.997**

Optical scattering, absorption and single scattering albedos (SSA) at three wavelengths, where  $SSA = 1/(1 + 1/m)$  and  $m$  is the slope of the above plots.

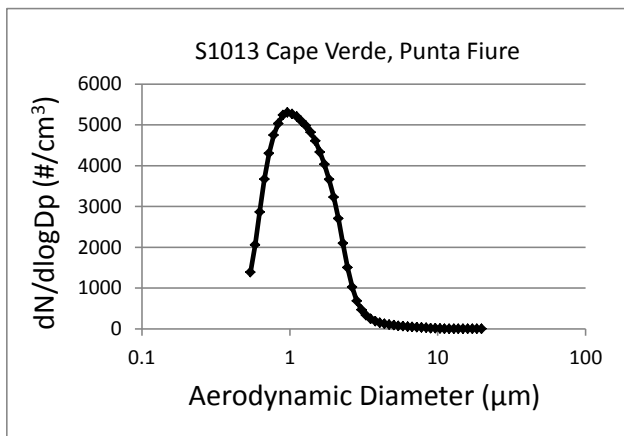

| Median ( $\mu m$ ) | Mean ( $\mu m$ ) | Geo. Mean ( $\mu m$ ) | Mode ( $\mu m$ ) | Geo. Std. Dev. ( $\mu m$ ) |
|--------------------|------------------|-----------------------|------------------|----------------------------|
| 1.149              | 1.309            | 1.182                 | 0.965            | 1.542                      |

|                                     | <u>Teflon Filters</u> |             |              |              |
|-------------------------------------|-----------------------|-------------|--------------|--------------|
|                                     | <u>PM10</u>           | <u>PM10</u> | <u>PM2.5</u> | <u>PM2.5</u> |
| Mass ( $\mu g$ )                    | 19130                 | 16540       | 5420         | 5070         |
| PM <sub>2.5</sub> /PM <sub>10</sub> | 0.28                  | 0.33        | 0.27         | 0.31         |
| Average                             | 0.30                  |             |              |              |
|                                     | <u>Betagaugue</u>     |             |              |              |
|                                     | <u>PM2.5</u>          |             | <u>PM10</u>  |              |
| Mass ( $\mu g/m^3$ )                | 179                   |             | 793.6        |              |
| PM <sub>2.5</sub> /PM <sub>10</sub> | 0.23                  |             |              |              |

**SEM Measured Aspect Ratio**

| Sample #     | Number of Particles | Min   | Max   | Geom Mean |
|--------------|---------------------|-------|-------|-----------|
| <b>S1013</b> | 1392                | 1.008 | 4.160 | 1.415     |

Particle size distribution for PM<sub>2.5</sub>, as well as Teflon filter and betagaugue mass measurements, together with PM<sub>2.5</sub>/PM<sub>10</sub> ratios.

**Sample S1014, Northwest China (Karamay)**

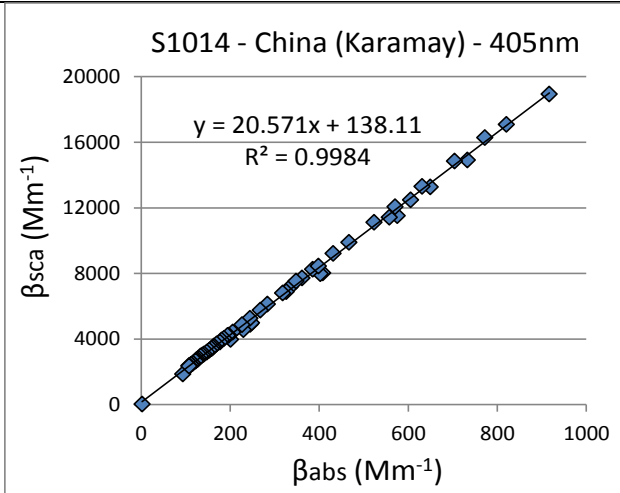

**SSA (405nm) = 0.954**

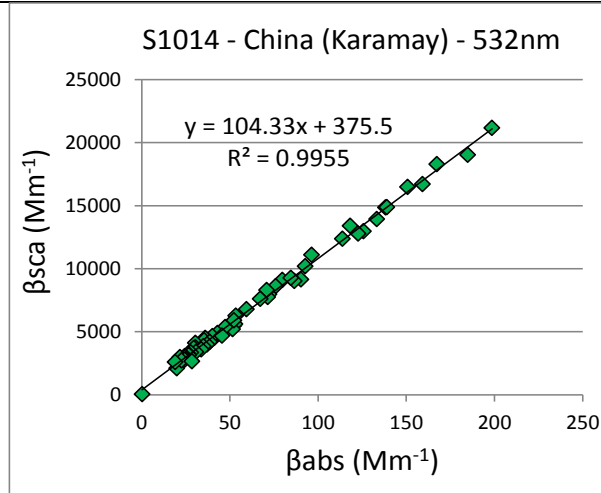

**SSA (532nm) = 0.991**

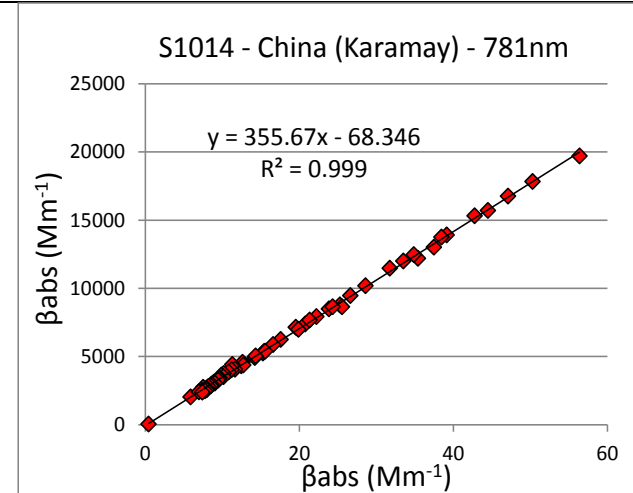

**SSA (781nm) = 0.997**

Optical scattering, absorption and single scattering albedos (SSA) at three wavelengths, where  $SSA = 1/(1 + 1/m)$  and  $m$  is the slope of the above plots.

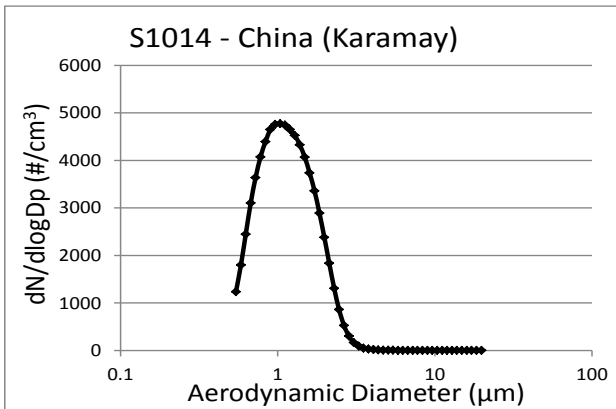

| Median<br>( $\mu\text{m}$ ) | Mean<br>( $\mu\text{m}$ ) | Geo. Mean<br>( $\mu\text{m}$ ) | Mode<br>( $\mu\text{m}$ ) | Geo. Std. Dev.<br>( $\mu\text{m}$ ) |
|-----------------------------|---------------------------|--------------------------------|---------------------------|-------------------------------------|
| 1.117                       | 1.224                     | 1.133                          | 1.030                     | 1.474                               |

|                                     | <b>Teflon Filters</b> |       |      |      |
|-------------------------------------|-----------------------|-------|------|------|
|                                     | PM2.5                 | PM2.5 | PM10 | PM10 |
| Mass ( $\mu\text{g}$ )              | 1880                  | 1800  | 5630 | 5050 |
| PM <sub>2.5</sub> /PM <sub>10</sub> | 0.33                  | 0.32  | 0.37 | 0.36 |
| Average                             | 0.35                  |       |      |      |
|                                     | <b>Betagaugue</b>     |       |      |      |
|                                     | PM2.5                 |       | PM10 |      |
| Mass ( $\mu\text{g}/\text{m}^3$ )   | 594                   |       | 1840 |      |
| PM <sub>2.5</sub> /PM <sub>10</sub> | 0.32                  |       |      |      |

| <b>SEM Measured Aspect Ratio</b> |                     |       |       |           |
|----------------------------------|---------------------|-------|-------|-----------|
| Sample #                         | Number of Particles | Min   | Max   | Geom Mean |
| <b>S1014</b>                     | 2336                | 1.000 | 4.570 | 1.446     |

Particle size distribution for PM<sub>2.5</sub>, as well as Teflon filter and betagaugue mass measurements, together with PM<sub>2.5</sub>/PM<sub>10</sub> ratios.

**Sample S1016, Northwest China (Karamay 2)**

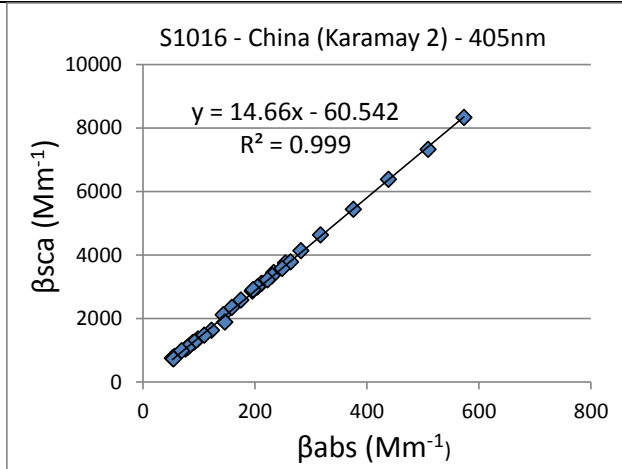

**SSA (405nm) = 0.936**

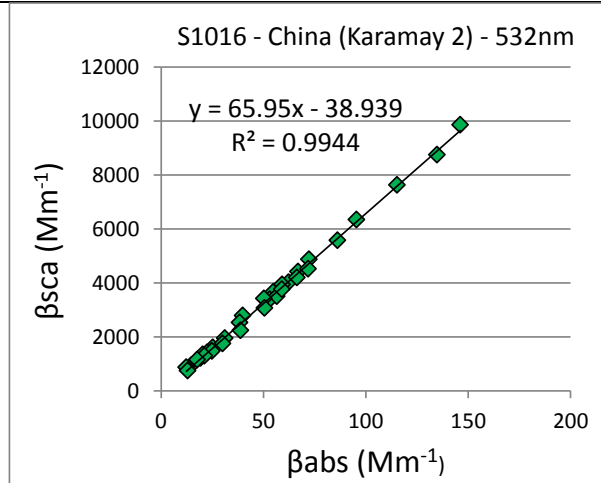

**SSA (532nm) = 0.985**

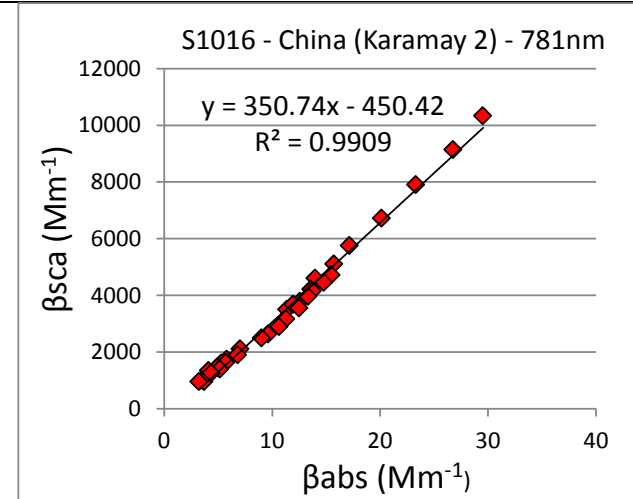

**SSA (781nm) = 0.997**

Optical scattering, absorption and single scattering albedos (SSA) at three wavelengths, where  $SSA = 1/(1 + 1/m)$  and  $m$  is the slope of the above plots.

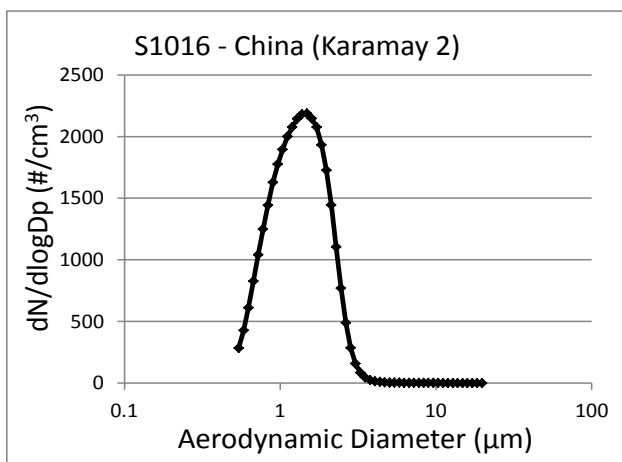

| Median            | Mean              | Geo. Mean         | Mode              | Geo. Std. Dev.    |
|-------------------|-------------------|-------------------|-------------------|-------------------|
| ( $\mu\text{m}$ ) |
| 1.314             | 1.400             | 1.297             | 1.446             | 1.481             |

|                                     | <u>Teflon Filters</u> |      |       |       |
|-------------------------------------|-----------------------|------|-------|-------|
|                                     | PM10                  | PM10 | PM2.5 | PM2.5 |
| Mass ( $\mu\text{g}$ )              | 5910                  | 5320 | 1660  | 1610  |
| PM <sub>2.5</sub> /PM <sub>10</sub> | 0.28                  | 0.28 | 0.27  | 0.30  |
| Average                             | 0.28                  |      |       |       |
|                                     | <u>Betagaugue</u>     |      |       |       |
|                                     | PM2.5                 | PM10 |       |       |
| Mass ( $\mu\text{g}/\text{m}^3$ )   | 700                   | 3114 |       |       |
| PM <sub>2.5</sub> /PM <sub>10</sub> | 0.22                  |      |       |       |

**SEM Measured Aspect Ratio**

| Sample #     | Number of Particles | Min   | Max   | Geom Mean |
|--------------|---------------------|-------|-------|-----------|
| <b>S1016</b> | 2405                | 1.000 | 4.035 | 1.405     |

Particle size distribution for PM<sub>2.5</sub>, as well as Teflon filter and betagaugue mass measurements, together with PM<sub>2.5</sub>/PM<sub>10</sub> ratios.

**Sample S1017, China (Xinjiang, Daemon City)**

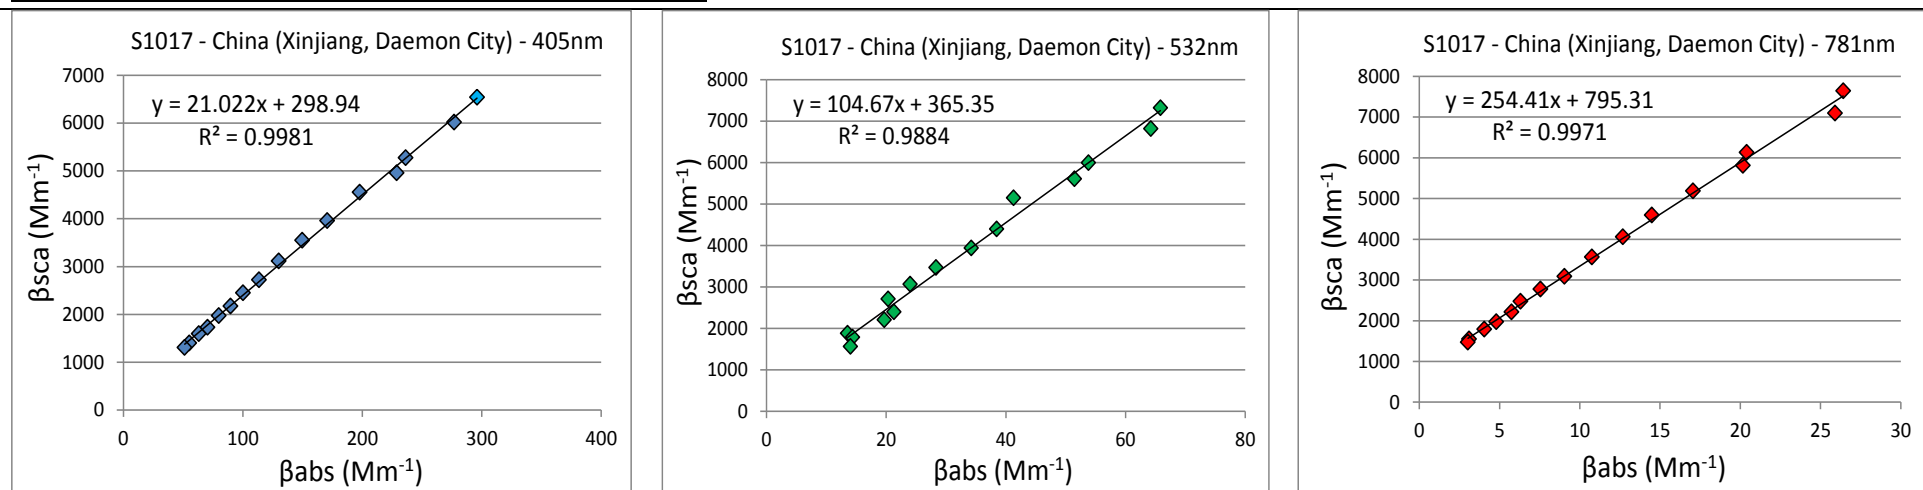

**SSA (405nm) = 0.955**

**SSA (532nm) = 0.991**

**SSA (781nm) = 0.996**

Optical scattering, absorption and single scattering albedos (SSA) at three wavelengths, where  $SSA = 1/(1 + 1/m)$  and  $m$  is the slope of the above plots.

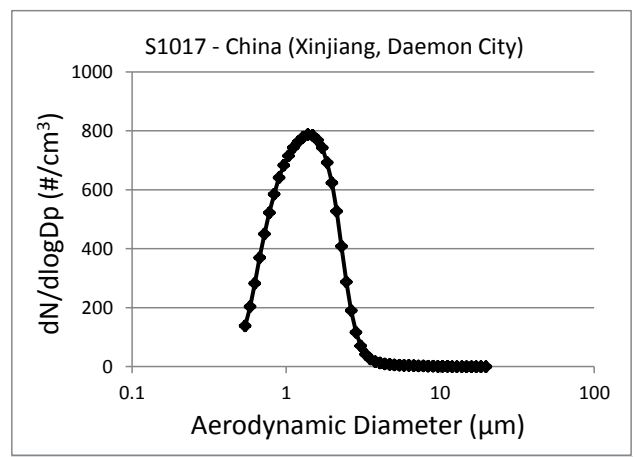

| Median (μm) | Mean (μm) | Geo. Mean (μm) | Mode (μm) | Geo. Std. Dev. (μm) |
|-------------|-----------|----------------|-----------|---------------------|
| 1.298       | 1.401     | 1.287          | 1.431     | 1.507               |

|                                     | <u>Teflon Filters</u> |       |        |        |
|-------------------------------------|-----------------------|-------|--------|--------|
|                                     | PM 10                 | PM 10 | PM 2.5 | PM 2.5 |
| Mass (μg)                           | 1700                  | 1900  | 450    | 390    |
| PM <sub>2.5</sub> /PM <sub>10</sub> | 0.23                  | 0.21  | 0.26   | 0.24   |
| Average                             | 0.23                  |       |        |        |
|                                     | <u>Betagaugue</u>     |       |        |        |
|                                     | PM2.5                 |       | PM10   |        |
| Mass (μg/m <sup>3</sup> )           | 577.9                 |       | 2562.1 |        |
| PM <sub>2.5</sub> /PM <sub>10</sub> | 0.23                  |       |        |        |

| <u>SEM Measured Aspect Ratio</u> |                     |       |       |           |
|----------------------------------|---------------------|-------|-------|-----------|
| Sample #                         | Number of Particles | Min   | Max   | Geom Mean |
| <b>S1017</b>                     | 1318                | 1.000 | 4.525 | 1.473     |

Particle size distribution for PM<sub>2.5</sub>, as well as Teflon filter and betagaugue mass measurements, together with PM<sub>2.5</sub>/PM<sub>10</sub> ratios.

**Sample S1018, China (Xinjiang, Daemon City), 2<sup>nd</sup> sample**

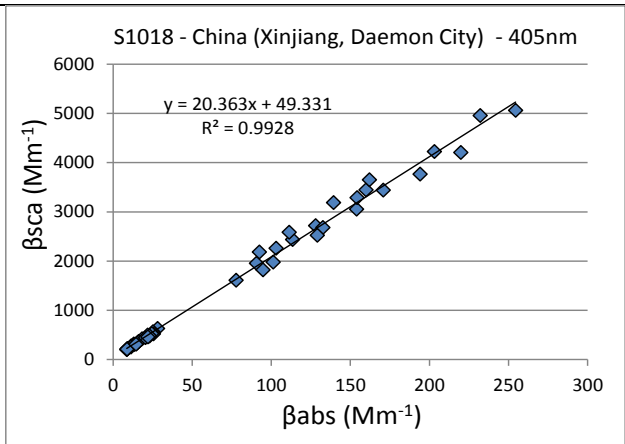

**SSA (405nm) = 0.953**

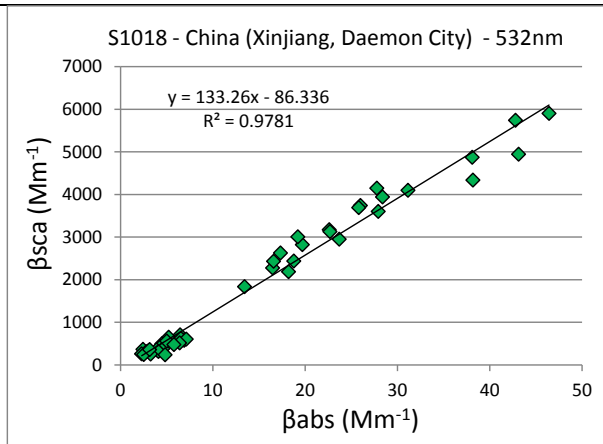

**SSA (532nm) = 0.993**

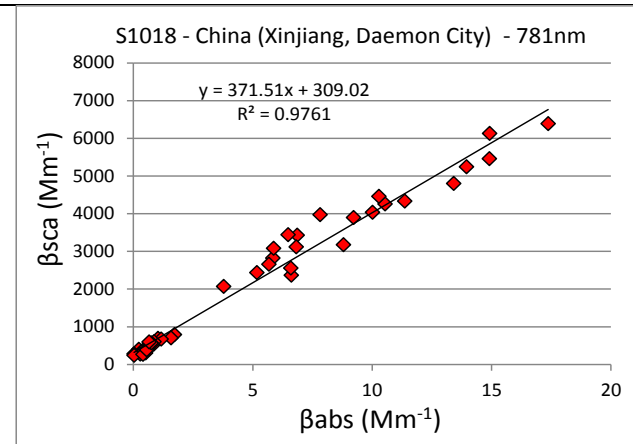

**SSA (781nm) = 0.997**

Optical scattering, absorption and single scattering albedos (SSA) at three wavelengths, where  $SSA = 1/(1 + 1/m)$  and  $m$  is the slope of the above plots.

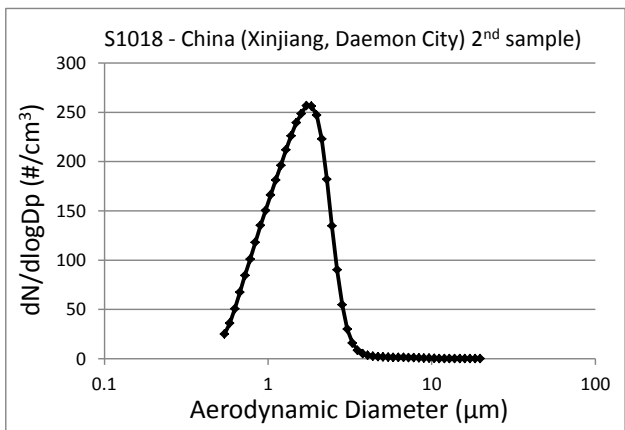

| Median            | Mean              | Geo. Mean         | Mode              | Geo. Std. Dev.    |
|-------------------|-------------------|-------------------|-------------------|-------------------|
| ( $\mu\text{m}$ ) |
| 1.474             | 1.539             | 1.421             | 1.769             | 1.497             |

|                                     | <u>Teflon Filters</u> |      |       |       |
|-------------------------------------|-----------------------|------|-------|-------|
|                                     | PM10                  | PM10 | PM2.5 | PM2.5 |
| Mass ( $\mu\text{g}$ )              | 1410                  | 1490 | 290   | 260   |
| PM <sub>2.5</sub> /PM <sub>10</sub> | 0.21                  | 0.18 | 0.19  | 0.17  |
| Average                             | 0.19                  |      |       |       |
|                                     |                       |      |       |       |
|                                     |                       |      |       |       |
|                                     | <u>Betagaugue</u>     |      |       |       |
|                                     | PM2.5                 | PM10 |       |       |
| Mass ( $\mu\text{g}/\text{m}^3$ )   | 588                   | 2628 |       |       |
| PM <sub>2.5</sub> /PM <sub>10</sub> | 0.22                  |      |       |       |

**SEM Measured Aspect Ratio**

| Sample #     | Number of Particles | Min   | Max   | Geom Mean |
|--------------|---------------------|-------|-------|-----------|
| <b>S1018</b> | 2418                | 1.000 | 6.711 | 1.407     |

Particle size distribution for PM<sub>2.5</sub>, as well as Teflon filter and betagaugue mass measurements, together with PM<sub>2.5</sub>/PM<sub>10</sub> ratios.



**Sample S1019, USA (Owens Lake, CA)**

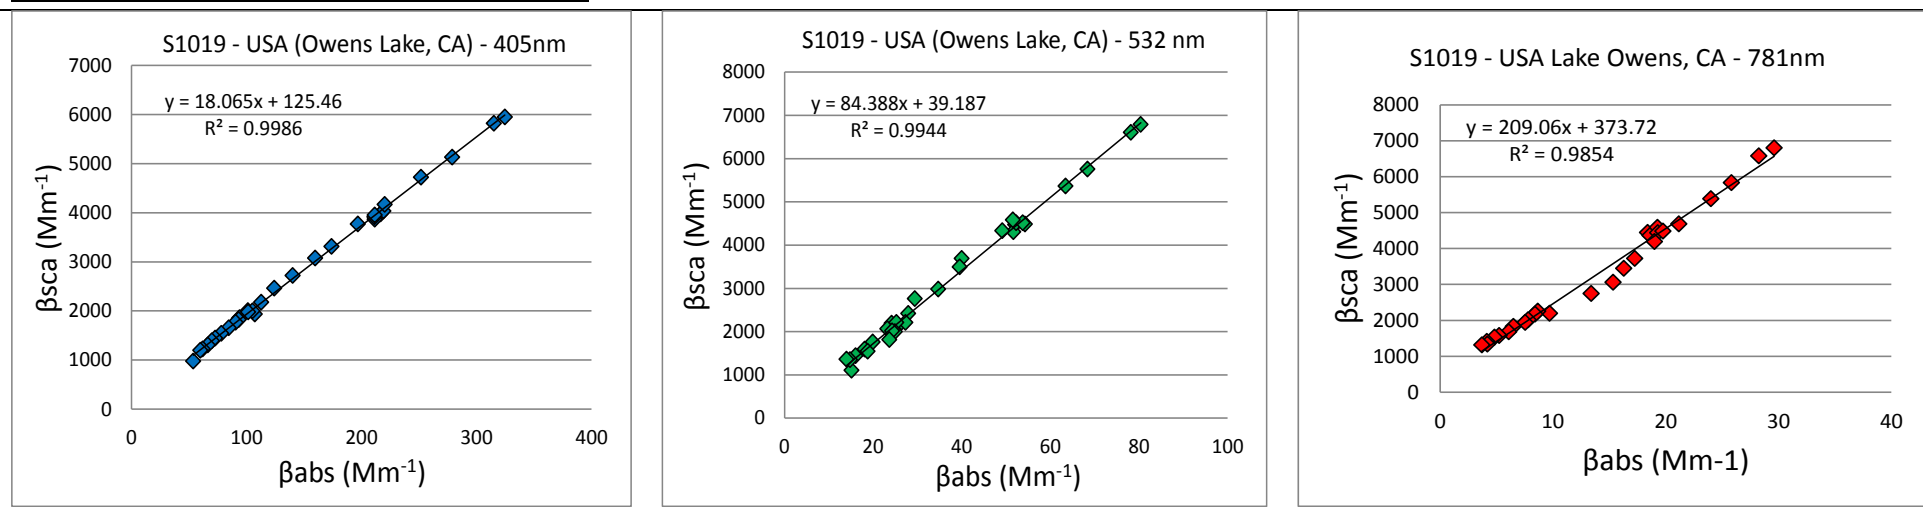

**SSA (405nm) = 0.948**

**SSA (532nm) = 0.988**

**SSA (781nm) = 0.995**

Optical scattering, absorption and single scattering albedo (SSA) at three wavelengths, where  $SSA = 1/(1 + 1/m)$  and  $m$  is the slope of the above plots.

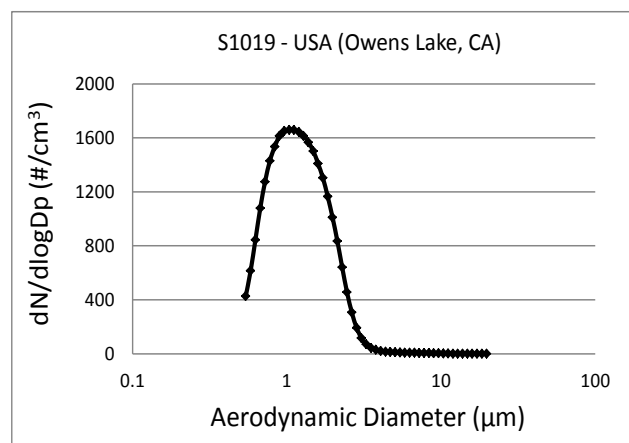

| Median<br>(μm) | Mean<br>(μm) | Geo. Mean<br>(μm) | Mode<br>(μm) | Geo. Std. Dev.<br>(μm) |
|----------------|--------------|-------------------|--------------|------------------------|
| 1.158          | 1.289        | 1.179             | 1.059        | 1.513                  |

| <b>Teflon Filters</b>               |       |      |        |       |
|-------------------------------------|-------|------|--------|-------|
|                                     | PM10  | PM10 | PM2.5  | PM2.5 |
| Mass (μg)                           | 6210  | 5190 | 1170   | 1150  |
| PM <sub>2.5</sub> /PM <sub>10</sub> | 0.19  | 0.19 | 0.23   | 0.22  |
| Average                             | 0.21  |      |        |       |
| <b>Betagaugue</b>                   |       |      |        |       |
|                                     | PM2.5 |      | PM10   |       |
| Mass (μg/m <sup>3</sup> )           | 369.1 |      | 1613.2 |       |
| PM <sub>2.5</sub> /PM <sub>10</sub> | 0.23  |      |        |       |

**SEM Measured Aspect Ratio**

| Sample #     | Number of Particles | Min   | Max   | Geom Mean |
|--------------|---------------------|-------|-------|-----------|
| <b>S1019</b> | 1302                | 1.005 | 5.285 | 1.494     |

Particle size distribution for PM<sub>2.5</sub>, as well as Teflon filter and betagaugue mass measurements, together with PM<sub>2.5</sub>/PM<sub>10</sub> ratios.

**Sample S1022, Namibia (Etosha, Fischer Pan)**

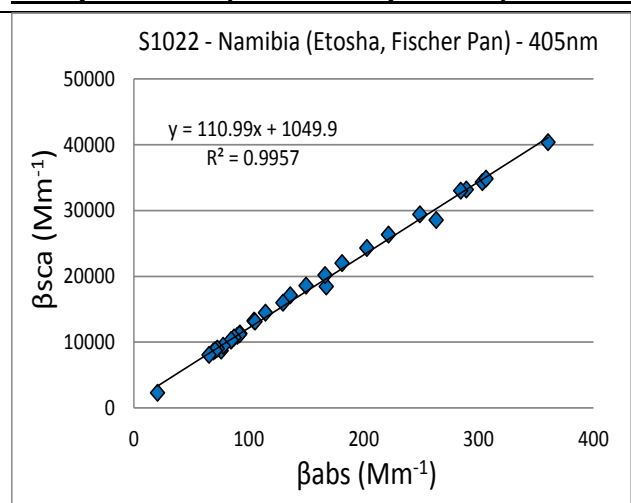

**SSA (405nm) = 0.991**

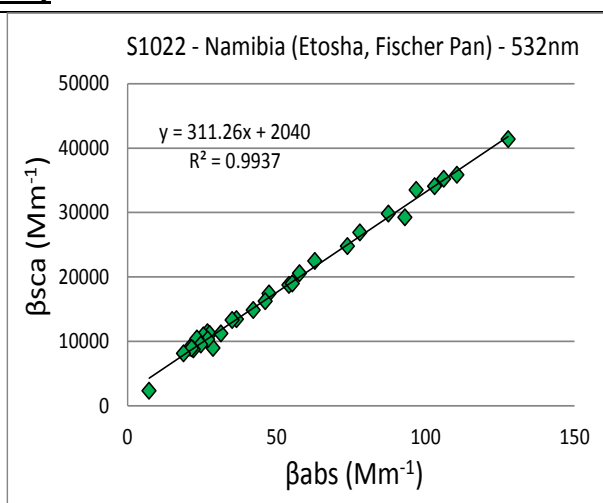

**SSA (532nm) = 0.997**

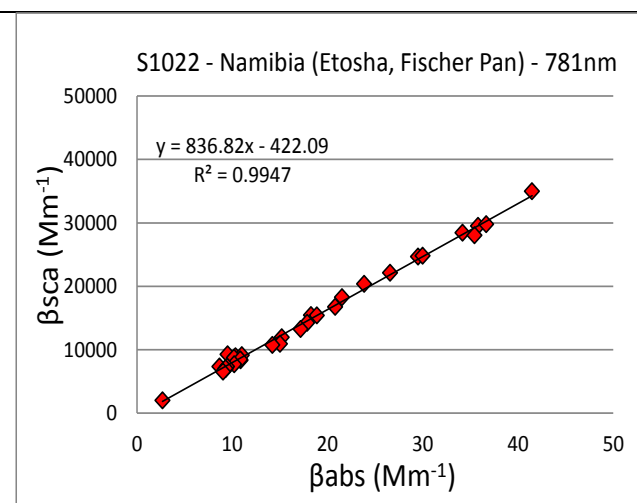

**SSA (781nm) = 0.999**

Optical scattering, absorption and single scattering albedos (SSA) at three wavelengths, where  $SSA = 1/(1 + 1/m)$  and  $m$  is the slope of the above plots.

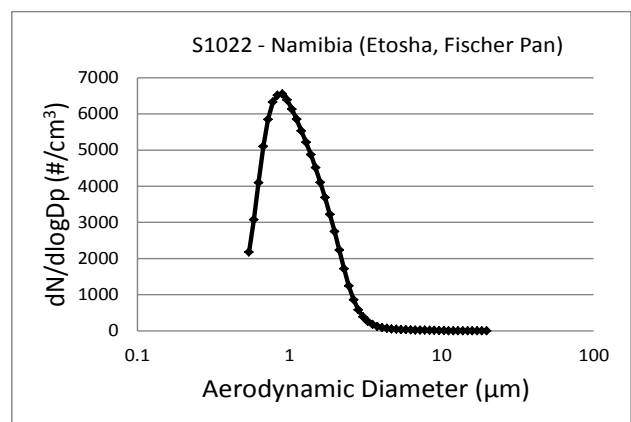

| Median<br>( $\mu\text{m}$ ) | Mean<br>( $\mu\text{m}$ ) | Geo. Mean<br>( $\mu\text{m}$ ) | Mode<br>( $\mu\text{m}$ ) | Geo. Std. Dev.<br>( $\mu\text{m}$ ) |
|-----------------------------|---------------------------|--------------------------------|---------------------------|-------------------------------------|
| 1.044                       | 1.199                     | 1.092                          | 0.880                     | 1.515                               |

| <u>Teflon Filters</u>               |       |       |       |       |
|-------------------------------------|-------|-------|-------|-------|
|                                     | PM10  | PM10  | PM2.5 | PM2.5 |
| Mass ( $\mu\text{g}$ )              | 14130 | 13030 | 5060  | 4870  |
| PM <sub>2.5</sub> /PM <sub>10</sub> | 0.36  | 0.34  | 0.39  | 0.37  |
| Average                             | 0.37  |       |       |       |
| <u>Betagaugue</u>                   |       |       |       |       |
|                                     | PM2.5 | PM10  |       |       |
| Mass ( $\mu\text{g}/\text{m}^3$ )   | 215.7 | 605.4 |       |       |
| PM <sub>2.5</sub> /PM <sub>10</sub> | 0.36  |       |       |       |

**SEM Measured Aspect Ratio**

| <u>Sample #</u> | <u>Number of</u> | <u>Min</u> | <u>Max</u> | <u>Geom</u> |
|-----------------|------------------|------------|------------|-------------|
|                 | <u>Particles</u> |            |            | <u>Mean</u> |
| <b>S1022</b>    | 1331             | 1.000      | 3.833      | 1.510       |

Particle size distribution for PM<sub>2.5</sub>, as well as Teflon filter and betagaugue mass measurements, together with PM<sub>2.5</sub>/PM<sub>10</sub> ratios.

**Sample S1023, Namibia (Etosha, Stinkwater)**

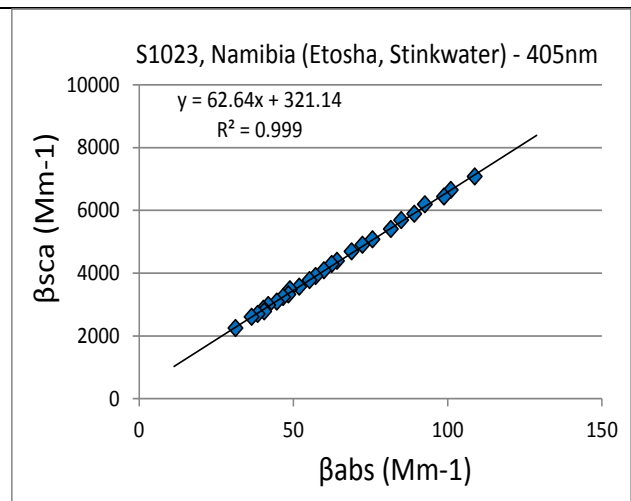

**SSA (405nm) = 0.984**

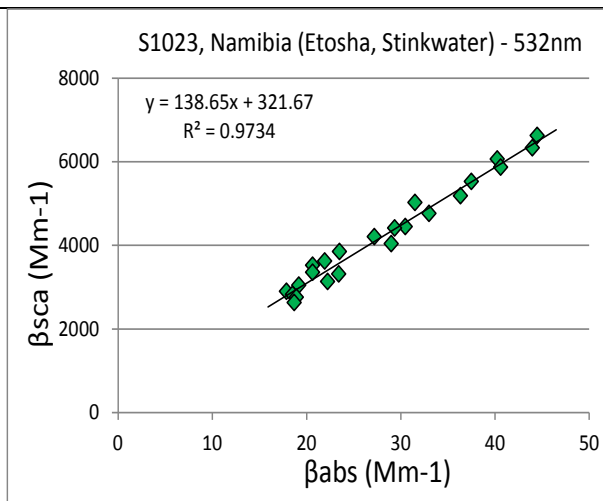

**SSA (532nm) = 0.993**

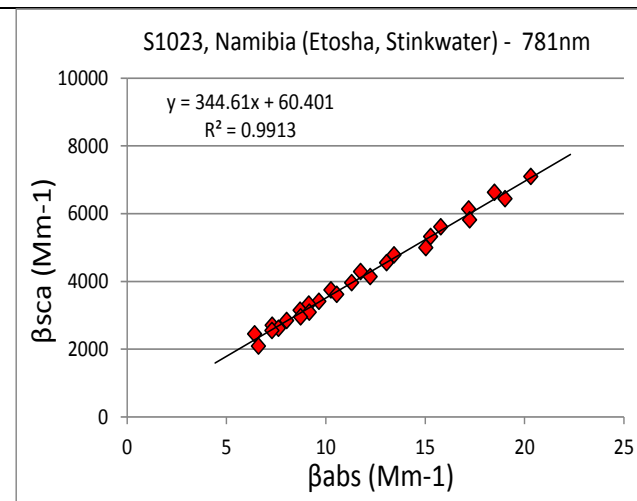

**SSA (781nm) = 0.997**

Optical scattering, absorption and single scattering albedos (SSA) at three wavelengths, where  $SSA = 1/(1 + 1/m)$  and  $m$  is the slope of the above plots.

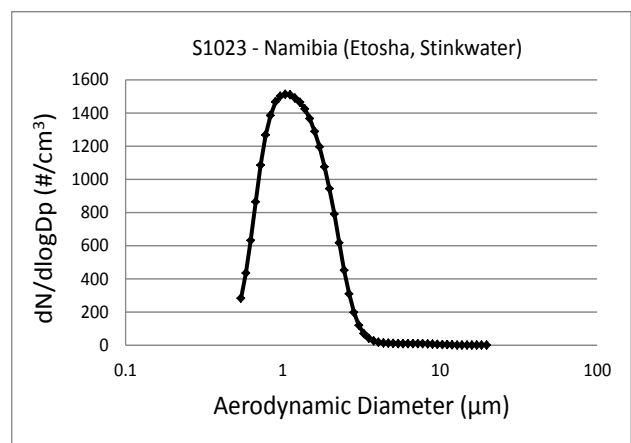

| <u>Median</u><br>( $\mu\text{m}$ ) | <u>Mean</u><br>( $\mu\text{m}$ ) | <u>Geo. Mean</u><br>( $\mu\text{m}$ ) | <u>Mode</u><br>( $\mu\text{m}$ ) | <u>Geo. Std. Dev.</u><br>( $\mu\text{m}$ ) |
|------------------------------------|----------------------------------|---------------------------------------|----------------------------------|--------------------------------------------|
| 1.184                              | 1.321                            | 1.206                                 | 1.056                            | 1.514                                      |

| <u>Teflon Filters</u>               |        |        |       |       |
|-------------------------------------|--------|--------|-------|-------|
|                                     | PM10   | PM10   | PM2.5 | PM2.5 |
| Mass ( $\mu\text{g}$ )              | 2140   | 2250   | 580   | 650   |
| PM <sub>2.5</sub> /PM <sub>10</sub> | 0.27   | 0.30   | 0.26  | 0.29  |
| Average                             | 0.28   |        |       |       |
| <u>Betagaugue</u>                   |        |        |       |       |
|                                     | PM2.5  | PM10   |       |       |
| Mass ( $\mu\text{g}/\text{m}^3$ )   | 1119.6 | 4316.4 |       |       |
| PM <sub>2.5</sub> /PM <sub>10</sub> | 0.26   |        |       |       |

**SEM Measured Aspect Ratio**

| <u>Sample #</u> | <u>Number of</u> | <u>Min</u> | <u>Max</u> | <u>Geom</u> |
|-----------------|------------------|------------|------------|-------------|
|                 | <u>Particles</u> |            |            | <u>Mean</u> |
| <b>S1023</b>    | 1400             | 1.000      | 3.922      | 1.457       |

Particle size distribution for PM<sub>2.5</sub>, as well as Teflon filter and betagaugue mass measurements, together with PM<sub>2.5</sub>/PM<sub>10</sub> ratios.

**Sample S1024, Namibia (Etosha, Lookout)**

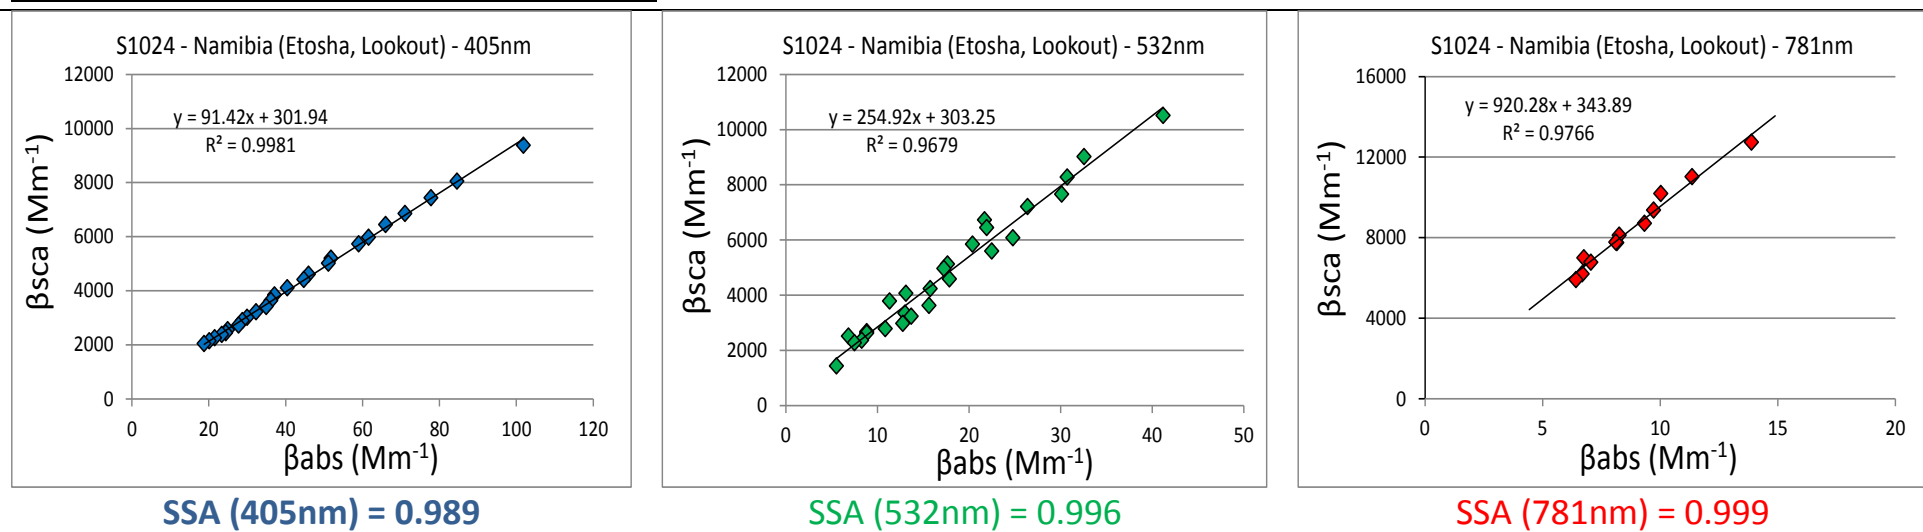

Optical scattering, absorption and single scattering albedo (SSA) at three wavelengths, where  $SSA = 1/(1 + 1/m)$  and  $m$  is the slope of the above plots.

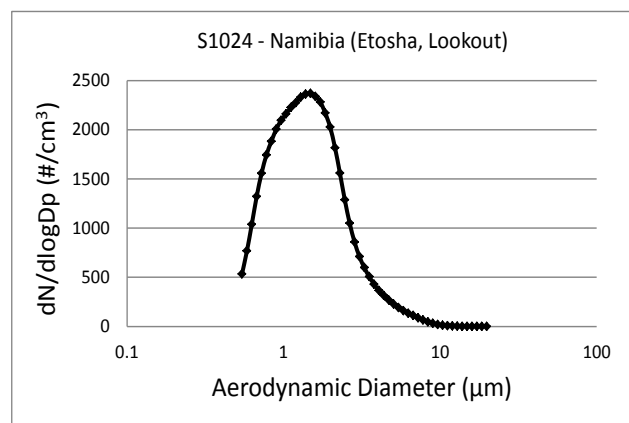

| Median (μm) | Mean (μm) | Geo. Mean (μm) | Mode (μm) | Geo. Std. Dev. (μm) |
|-------------|-----------|----------------|-----------|---------------------|
| 1.331       | 1.566     | 1.363          | 1.415     | 1.650               |

| <u>Teflon Filters</u>               |              |             |              |              |
|-------------------------------------|--------------|-------------|--------------|--------------|
|                                     | <u>PM10</u>  | <u>PM10</u> | <u>PM2.5</u> | <u>PM2.5</u> |
| Mass (μg)                           | 11050        | 8550        | 1730         | 1570         |
| PM <sub>2.5</sub> /PM <sub>10</sub> | 0.16         | 0.14        | 0.20         | 0.18         |
| Average                             | 0.17         |             |              |              |
| <u>Betagaugue</u>                   |              |             |              |              |
|                                     | <u>PM2.5</u> | <u>PM10</u> |              |              |
| Mass (μg/m <sup>3</sup> )           | 487.9        | 3052.8      |              |              |
| PM <sub>2.5</sub> /PM <sub>10</sub> | 0.16         |             |              |              |

| <u>SEM Measured Aspect Ratio</u> |                            |            |            |                  |
|----------------------------------|----------------------------|------------|------------|------------------|
| <u>Sample #</u>                  | <u>Number of Particles</u> | <u>Min</u> | <u>Max</u> | <u>Geom Mean</u> |
| <b>S1024</b>                     | 1389                       | 1.000      | 4.024      | 1.514            |

Particle size distribution for PM<sub>2.5</sub>, as well as Teflon filter and betagaugue mass measurements, together with PM<sub>2.5</sub>/PM<sub>10</sub> ratios.

**Sample S1025, Morocco (Lake Iriki)**

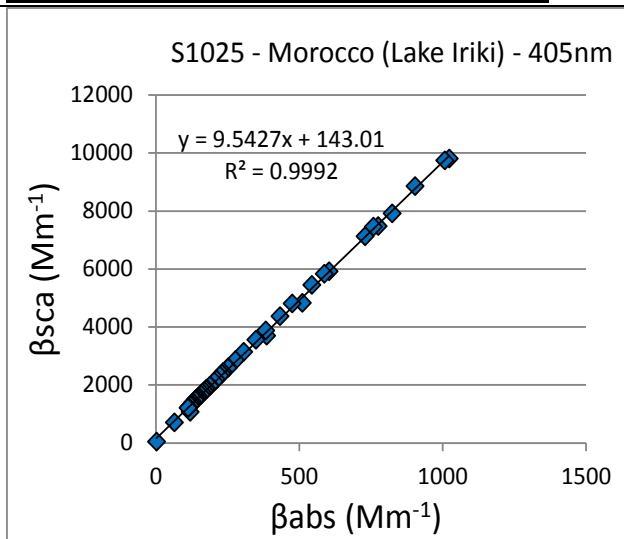

**SSA (405nm) = 0.905**

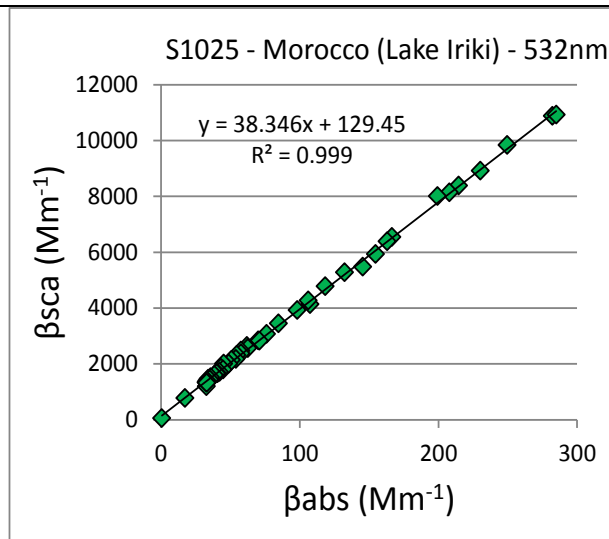

**SSA (532nm) = 0.975**

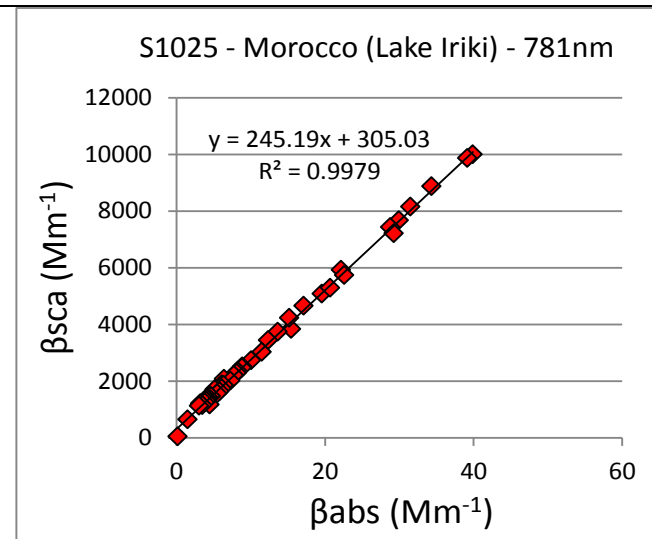

**SSA (781nm) = 0.996**

Optical scattering, absorption and single scattering albedos (SSA) at three wavelengths, where  $SSA = 1/(1 + 1/m)$  and  $m$  is the slope of the above plots.

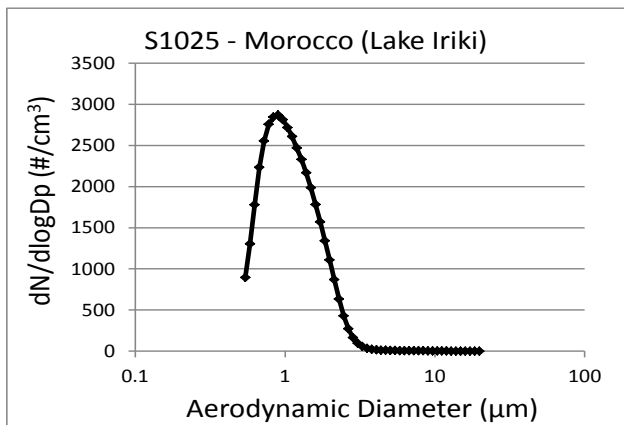

| Median            | Mean              | Geo. Mean         | Mode              | Geo. Std. Dev.    |
|-------------------|-------------------|-------------------|-------------------|-------------------|
| ( $\mu\text{m}$ ) |
| 1.029             | 1.159             | 1.068             | 0.883             | 1.481             |

|                                     | <u>Teflon Filters</u> |             |              |              |
|-------------------------------------|-----------------------|-------------|--------------|--------------|
|                                     | <u>PM10</u>           | <u>PM10</u> | <u>PM2.5</u> | <u>PM2.5</u> |
| Mass ( $\mu\text{g}$ )              | 4460                  | 3590        | 1320         | 1220         |
| PM <sub>2.5</sub> /PM <sub>10</sub> | 0.30                  | 0.27        | 0.37         | 0.34         |
| Average                             | 0.32                  |             |              |              |
|                                     |                       |             |              |              |
|                                     |                       |             |              |              |
|                                     | <u>Betagaugue</u>     |             |              |              |
|                                     | <u>PM2.5</u>          | <u>PM10</u> |              |              |
| Mass ( $\mu\text{g}/\text{m}^3$ )   | 712                   | 2590        |              |              |
| PM <sub>2.5</sub> /PM <sub>10</sub> | 0.27                  |             |              |              |

**SEM Measured Aspect Ratio**

| Sample #     | Number of Particles | Min   | Max   | Geom Mean |
|--------------|---------------------|-------|-------|-----------|
| <b>S1025</b> | 1328                | 1.008 | 5.461 | 1.493     |

Particle size distribution for PM<sub>2.5</sub>, as well as Teflon filter and betagaugue mass measurements, together with PM<sub>2.5</sub>/PM<sub>10</sub> ratios.

**Sample S1027, Spain (Canary islands, Galdar, Gran Canaria)**

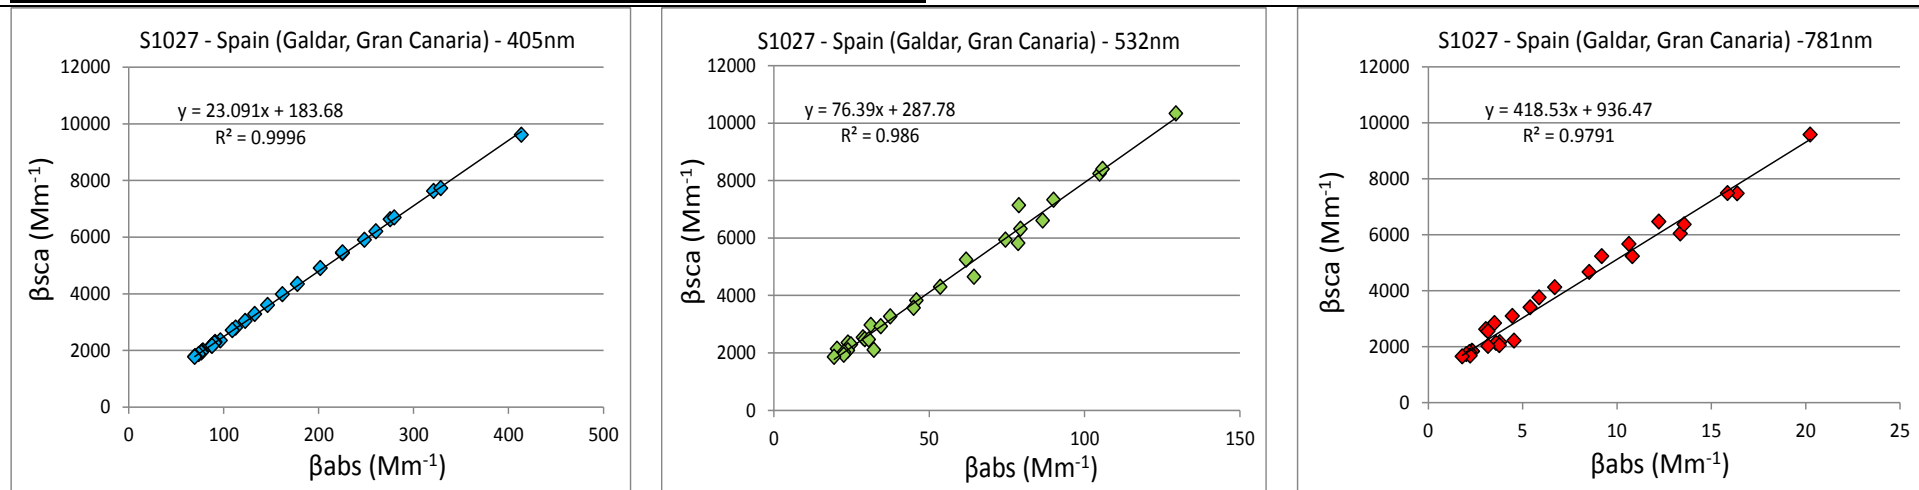

**SSA (405nm) = 0.958**

**SSA (532nm) = 0.987**

**SSA (781nm) = 0.998**

Optical scattering, absorption and single scattering albedos (SSA) at three wavelengths, where  $SSA = 1/(1 + 1/m)$  and  $m$  is the slope of the above plots.

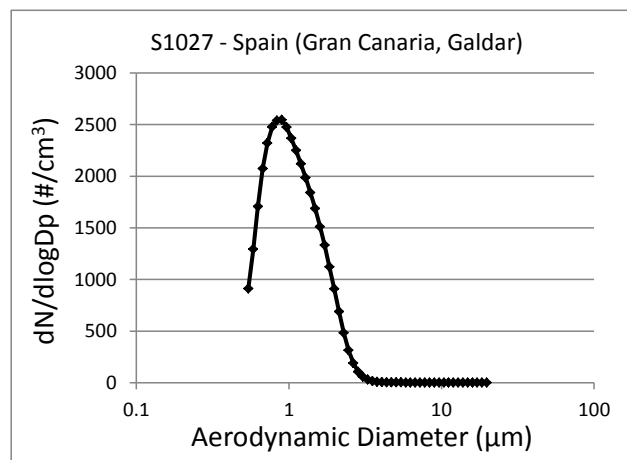

| Median<br>( $\mu\text{m}$ ) | Mean<br>( $\mu\text{m}$ ) | Geo. Mean<br>( $\mu\text{m}$ ) | Mode<br>( $\mu\text{m}$ ) | Geo. Std. Dev.<br>( $\mu\text{m}$ ) |
|-----------------------------|---------------------------|--------------------------------|---------------------------|-------------------------------------|
| 1.010                       | 1.131                     | 1.047                          | 0.876                     | 1.470                               |

|                                   | <u>Teflon Filters</u> |              |               |               |
|-----------------------------------|-----------------------|--------------|---------------|---------------|
|                                   | <u>PM 10</u>          | <u>PM 10</u> | <u>PM 2.5</u> | <u>PM 2.5</u> |
| Mass ( $\mu\text{g}$ )            | 5460                  | 4540         | 1410          | 1310          |
| PM2.5/PM10                        | 0.26                  | 0.24         | 0.31          | 0.29          |
| Average                           | 0.27                  |              |               |               |
|                                   |                       |              |               |               |
|                                   |                       |              |               |               |
|                                   | <u>Betagaugue</u>     |              |               |               |
|                                   | <u>PM2.5</u>          |              | <u>PM10</u>   |               |
| Mass ( $\mu\text{g}/\text{m}^3$ ) | 478                   |              | 1801.1        |               |
| PM2.5/PM10                        | 0.27                  |              |               |               |

**SEM Measured Aspect Ratio**

| <u>Sample #</u> | <u>Number of</u> | <u>Min</u> | <u>Max</u> | <u>Geom</u> |
|-----------------|------------------|------------|------------|-------------|
|                 | <u>Particles</u> |            |            | <u>Mean</u> |
| <b>S1027</b>    | 1383             | 1.000      | 3.691      | 1.506       |

Particle size distribution for PM<sub>2.5</sub>, as well as Teflon filter and betagaugue mass measurements, together with PM<sub>2.5</sub>/PM<sub>10</sub> ratios.

**Sample S1033, Spain (Canary Islands, Fuerteventura, Pozo Negro)**

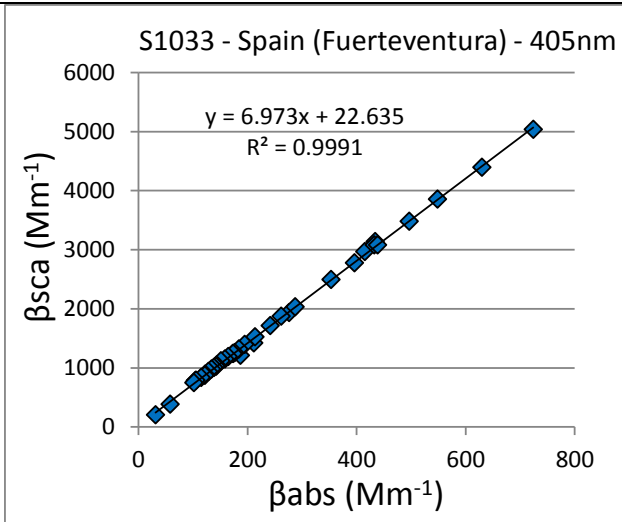

**SSA (405nm) = 0.875**

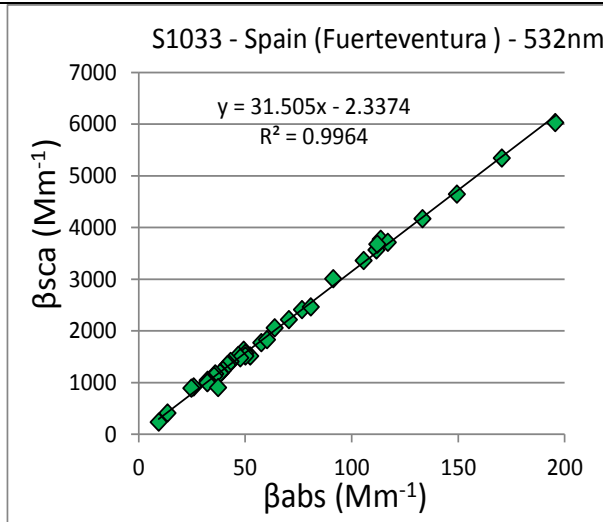

**SSA (532nm) = 0.969**

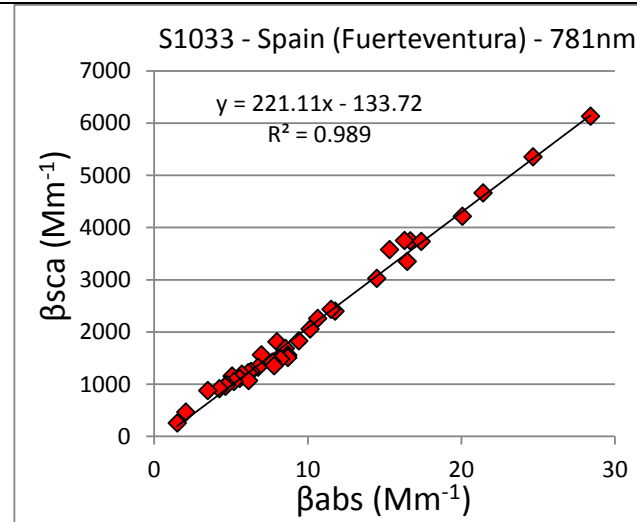

**SSA (781nm) = 0.995**

Optical scattering, absorption and single scattering albedos (SSA) at three wavelengths, where  $SSA = 1/(1 + 1/m)$  and  $m$  is the slope of the above plots.

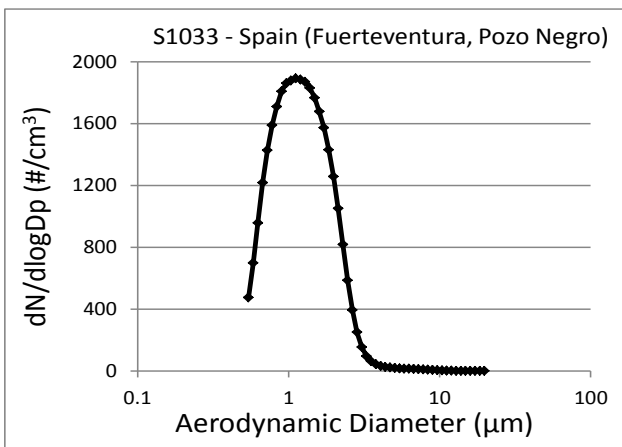

| Median            | Mean              | Geo. Mean         | Mode              | Geo. Std. Dev.    |
|-------------------|-------------------|-------------------|-------------------|-------------------|
| ( $\mu\text{m}$ ) |
| 1.189             | 1.323             | 1.205             | 1.151             | 1.525             |

|                                     | <u>Teflon Filters</u> |             |              |              |
|-------------------------------------|-----------------------|-------------|--------------|--------------|
|                                     | <u>PM10</u>           | <u>PM10</u> | <u>PM2.5</u> | <u>PM2.5</u> |
| Mass ( $\mu\text{g}$ )              | 4420                  | 3720        | 800          | 890          |
| PM <sub>2.5</sub> /PM <sub>10</sub> | 0.18                  | 0.20        | 0.22         | 0.24         |
| Average                             | 0.21                  |             |              |              |
|                                     |                       |             |              |              |
|                                     |                       |             |              |              |
|                                     | <u>Betagaugue</u>     |             |              |              |
|                                     | <u>PM2.5</u>          |             | <u>PM10</u>  |              |
| Mass ( $\mu\text{g}/\text{m}^3$ )   | 419                   |             | 2144         |              |
| PM <sub>2.5</sub> /PM <sub>10</sub> | 0.20                  |             |              |              |

| <u>SEM Measured Aspect Ratio</u> |                  |            |            |             |
|----------------------------------|------------------|------------|------------|-------------|
| <u>Sample #</u>                  | <u>Number of</u> | <u>Min</u> | <u>Max</u> | <u>Geom</u> |
|                                  | <u>Particles</u> |            |            | <u>Mean</u> |
| <b>S1033</b>                     | 1186             | 1.000      | 5.232      | 1.497       |

Particle size distribution for PM<sub>2.5</sub>, as well as Teflon filter and betagaugue mass measurements, together with PM<sub>2.5</sub>/PM<sub>10</sub> ratios.

**Sample S1034, Spain (Canary Islands, Pozo Negro, Fuerteventura) 2<sup>nd</sup> Sample**

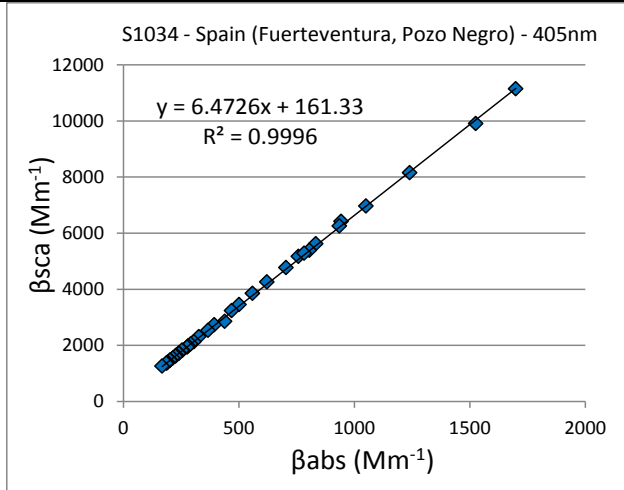

**SSA (405nm) = 0.866**

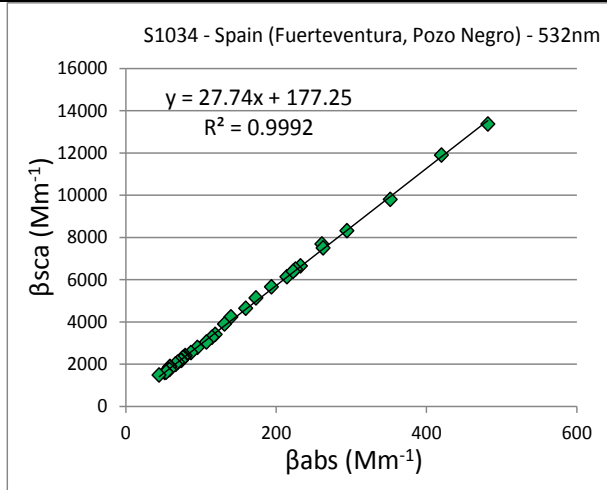

**SSA (532nm) = 0.965**

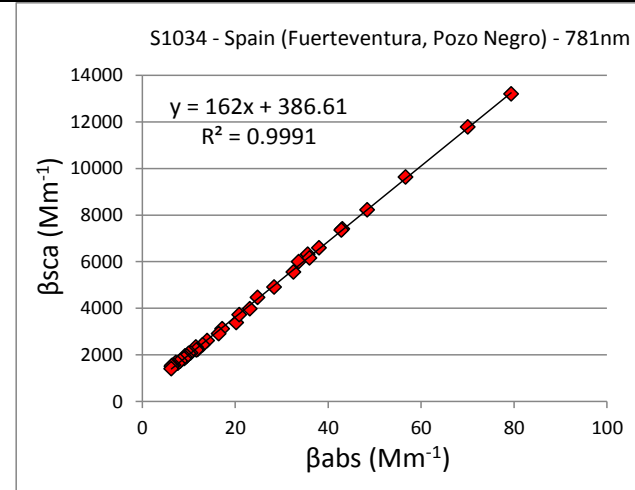

**SSA (781nm) = 0.994**

Optical scattering, absorption and single scattering albedos (SSA) at three wavelengths, where  $SSA = 1/(1 + 1/m)$  and  $m$  is the slope of the above plots.

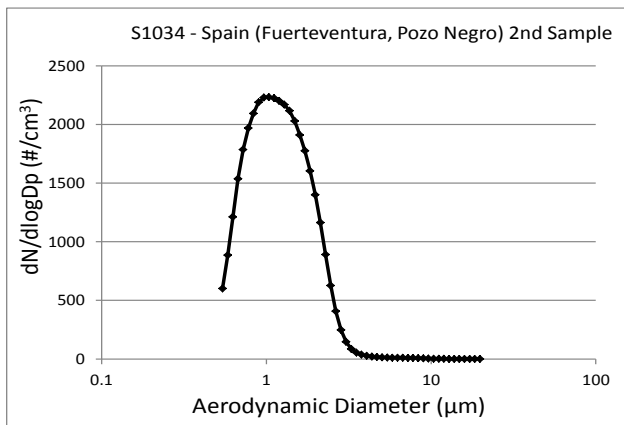

| Median<br>( $\mu\text{m}$ ) | Mean<br>( $\mu\text{m}$ ) | Geo. Mean<br>( $\mu\text{m}$ ) | Mode<br>( $\mu\text{m}$ ) | Geo. Std. Dev.<br>( $\mu\text{m}$ ) |
|-----------------------------|---------------------------|--------------------------------|---------------------------|-------------------------------------|
| 1.147                       | 1.275                     | 1.167                          | 1.030                     | 1.512                               |

|                                   | <u>Teflon Filters</u> |              |               |               |
|-----------------------------------|-----------------------|--------------|---------------|---------------|
|                                   | <u>PM 10</u>          | <u>PM 10</u> | <u>PM 2.5</u> | <u>PM 2.5</u> |
| Mass ( $\mu\text{g}$ )            | 7890                  | 6750         | 1530          | 1500          |
| PM2.5/PM10                        | 0.19                  | 0.19         | 0.23          | 0.22          |
| Average                           | 0.21                  |              |               |               |
|                                   | <u>Betagaugue</u>     |              |               |               |
|                                   | <u>PM2.5</u>          | <u>PM10</u>  |               |               |
| Mass ( $\mu\text{g}/\text{m}^3$ ) | 453.7                 | 2544.3       |               |               |
| PM2.5/PM10                        | 0.18                  |              |               |               |

| <u>SEM Measured Aspect Ratio</u> |                  |            |            |             |
|----------------------------------|------------------|------------|------------|-------------|
| <u>Sample #</u>                  | <u>Number of</u> | <u>Min</u> | <u>Max</u> | <u>Geom</u> |
|                                  | <u>Particles</u> |            |            | <u>Mean</u> |
| <b>S1034</b>                     | 1826             | 1.006      | 8.500      | 1.586       |

Particle size distribution for PM<sub>2.5</sub>, as well as Teflon filter and betagaugue mass measurements, together with PM<sub>2.5</sub>/PM<sub>10</sub> ratios.



**Sample S1035, Spain (Fuerteventura, La Ampuyenta)**

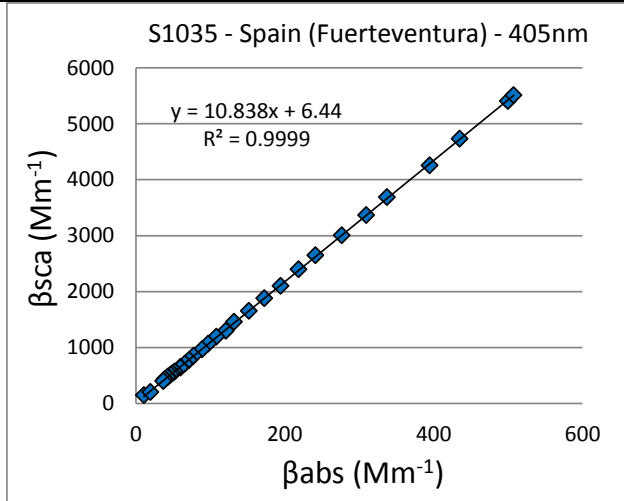

**SSA (405nm) = 0.916**

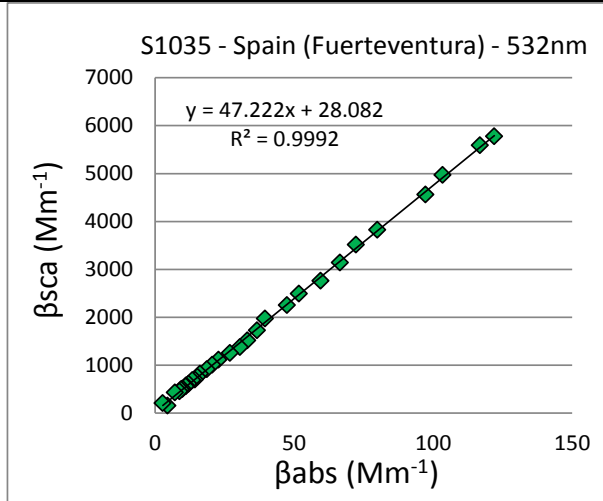

**SSA (532nm) = 0.979**

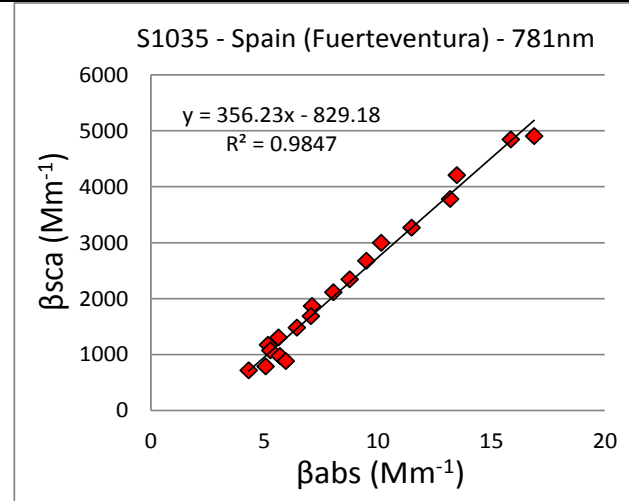

**SSA (781nm) = 0.997**

Optical scattering, absorption and single scattering albedos (SSA) at three wavelengths, where  $SSA = 1/(1 + 1/m)$  and  $m$  is the slope of the above plots.

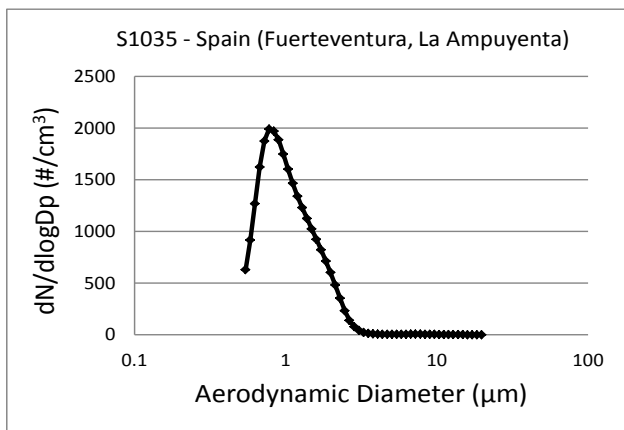

| Median<br>( $\mu\text{m}$ ) | Mean<br>( $\mu\text{m}$ ) | Geo. Mean<br>( $\mu\text{m}$ ) | Mode<br>( $\mu\text{m}$ ) | Geo. Std. Dev.<br>( $\mu\text{m}$ ) |
|-----------------------------|---------------------------|--------------------------------|---------------------------|-------------------------------------|
| 0.961                       | 1.104                     | 1.018                          | 0.777                     | 1.473                               |

| <u>Teflon Filters</u>               |       |      |       |       |
|-------------------------------------|-------|------|-------|-------|
|                                     | PM10  | PM10 | PM2.5 | PM2.5 |
| Mass ( $\mu\text{g}$ )              | 2210  | 2000 | 520   | 500   |
| PM <sub>2.5</sub> /PM <sub>10</sub> | 0.24  | 0.23 | 0.26  | 0.25  |
| Average                             | 0.24  |      |       |       |
| <u>Betagaugue</u>                   |       |      |       |       |
|                                     | PM2.5 | PM10 |       |       |
| Mass ( $\mu\text{g}/\text{m}^3$ )   | 528.2 | 1638 |       |       |
| PM <sub>2.5</sub> /PM <sub>10</sub> | 0.32  |      |       |       |

| <u>SEM Measured Aspect Ratio</u> |                     |       |       |           |
|----------------------------------|---------------------|-------|-------|-----------|
| Sample #                         | Number of Particles | Min   | Max   | Geom Mean |
| <b>S1035</b>                     | 1355                | 1.000 | 6.771 | 1.464     |

Particle size distribution for PM<sub>2.5</sub>, as well as Teflon filter and betagaugue mass measurements, together with PM<sub>2.5</sub>/PM<sub>10</sub> ratios.

**Sample S1038, Botswana (Makgadikgadi Pan, Mopipi)**

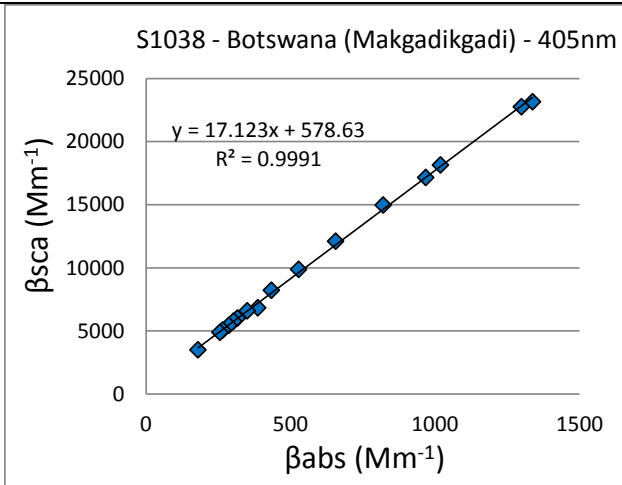

**SSA (405nm) = 0.945**

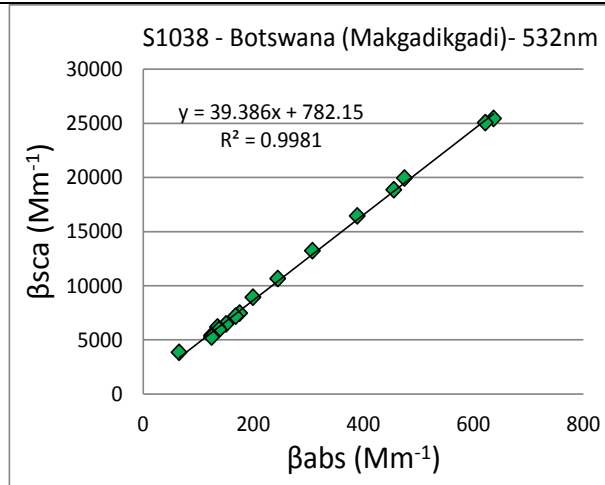

**SSA (532nm) = 0.975**

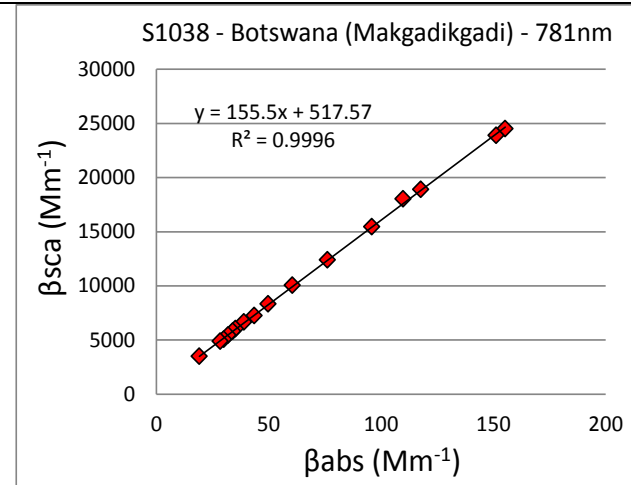

**SSA (781nm) = 0.994**

Optical scattering, absorption and single scattering albedos (SSA) at three wavelengths, where  $SSA = 1/(1 + 1/m)$  and  $m$  is the slope of the above plots.

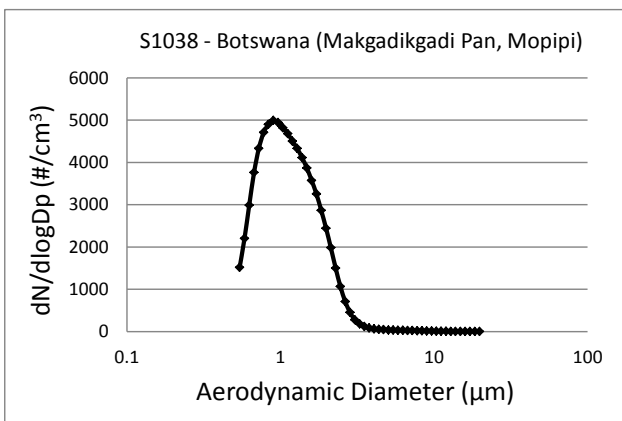

| Median            | Mean              | Geo. Mean         | Mode              | Geo. Std. Dev.    |
|-------------------|-------------------|-------------------|-------------------|-------------------|
| ( $\mu\text{m}$ ) |
| 1.085             | 1.228             | 1.121             | 0.918             | 1.511             |

| Teflon Filters                      |       |      |       |       |
|-------------------------------------|-------|------|-------|-------|
|                                     | PM10  | PM10 | PM2.5 | PM2.5 |
| Mass ( $\mu\text{g}$ )              | 10630 | 9400 | 3160  | 3030  |
| PM <sub>2.5</sub> /PM <sub>10</sub> | 0.30  | 0.29 | 0.34  | 0.32  |
| Average                             | 0.31  |      |       |       |
| Betagauge                           |       |      |       |       |
|                                     | PM2.5 |      | PM10  |       |
| Mass ( $\mu\text{g}/\text{m}^3$ )   | 210.1 |      | 642.7 |       |
| PM <sub>2.5</sub> /PM <sub>10</sub> | 0.33  |      |       |       |

| SEM Measured Aspect Ratio |                     |       |       |           |
|---------------------------|---------------------|-------|-------|-----------|
| Sample #                  | Number of Particles | Min   | Max   | Geom Mean |
| <b>S1038</b>              | 1340                | 1.000 | 3.815 | 1.478     |

Particle size distribution for PM<sub>2.5</sub>, as well as Teflon filter and betagauge mass measurements, together with PM<sub>2.5</sub>/PM<sub>10</sub> ratios.

**Sample S1039, Botswana (Makgadikgadi Pan, Rakops)**

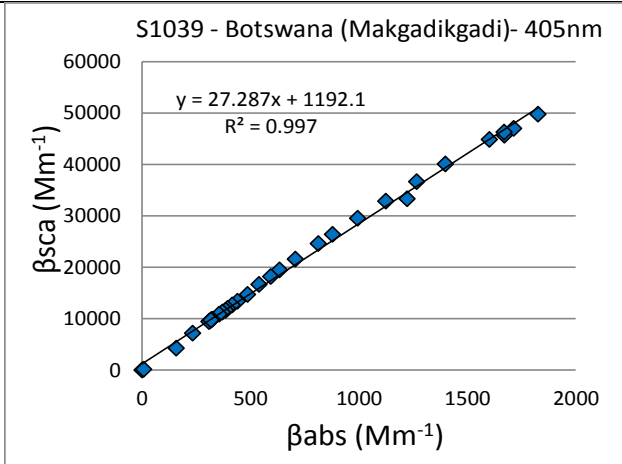

**SSA (405nm) = 0.965**

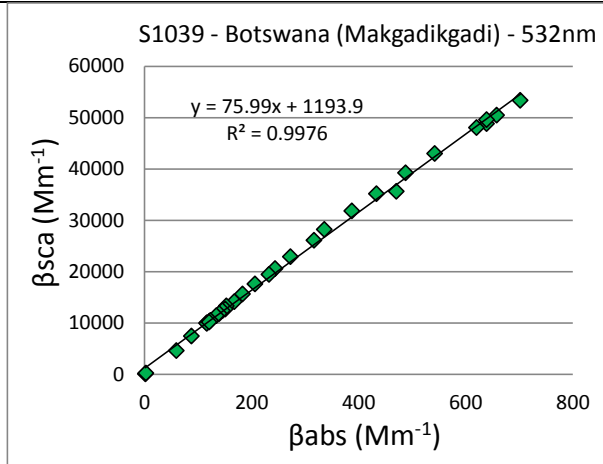

**SSA (532nm) = 0.987**

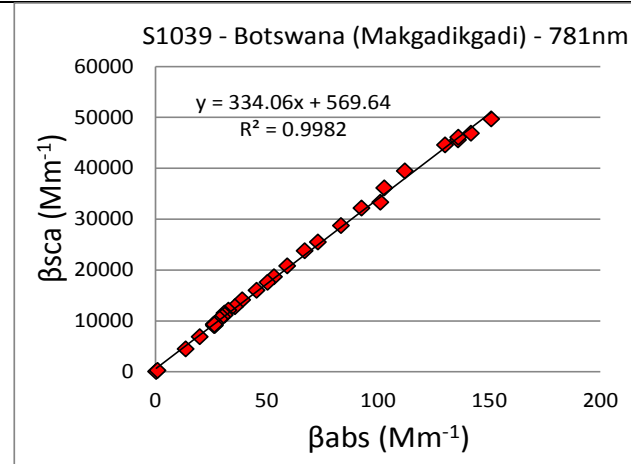

**SSA (781nm) = 0.997**

Optical scattering, absorption and single scattering albedos (SSA) at three wavelengths, where  $SSA = 1/(1 + 1/m)$  and  $m$  is the slope of the above plots.

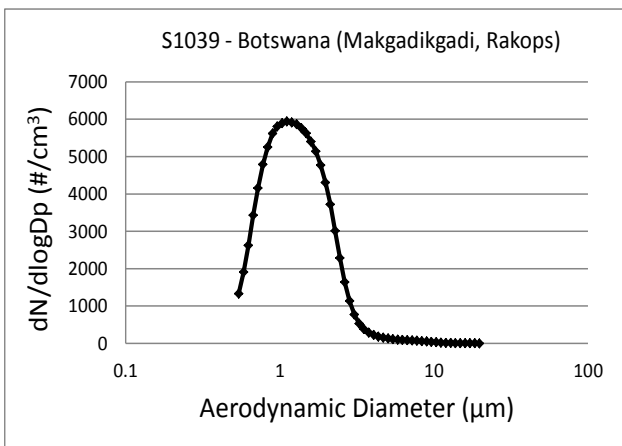

| <b>Teflon Filters</b>               |       |       |       |       |
|-------------------------------------|-------|-------|-------|-------|
|                                     | PM10  | PM10  | PM2.5 | PM2.5 |
| Mass ( $\mu\text{g}$ )              | 18290 | 25390 | 7380  | 7460  |
| PM <sub>2.5</sub> /PM <sub>10</sub> | 0.40  | 0.41  | 0.29  | 0.29  |
| Average                             | 0.35  |       |       |       |
| <b>Betagaugue</b>                   |       |       |       |       |
|                                     | PM2.5 |       | PM10  |       |
| Mass ( $\mu\text{g}/\text{m}^3$ )   | 97.6  |       | 256.3 |       |
| PM <sub>2.5</sub> /PM <sub>10</sub> | 0.38  |       |       |       |

| <b>SEM Measured Aspect Ratio</b> |                     |       |       |           |
|----------------------------------|---------------------|-------|-------|-----------|
| Sample #                         | Number of Particles | Min   | Max   | Geom Mean |
| <b>S1039</b>                     | 1279                | 1.000 | 5.333 | 1.522     |

| Median            | Mean              | Geo. Mean         | Mode              | Geo. Std. Dev.    |
|-------------------|-------------------|-------------------|-------------------|-------------------|
| ( $\mu\text{m}$ ) |
| 1.229             | 1.399             | 1.255             | 1.115             | 1.556             |

Particle size distribution for PM<sub>2.5</sub>, as well as Teflon filter and betagaugue mass measurements, together with PM<sub>2.5</sub>/PM<sub>10</sub> ratios.

**Sample S1040, Botswana (Nxai Pan, Baines Baobabs)**

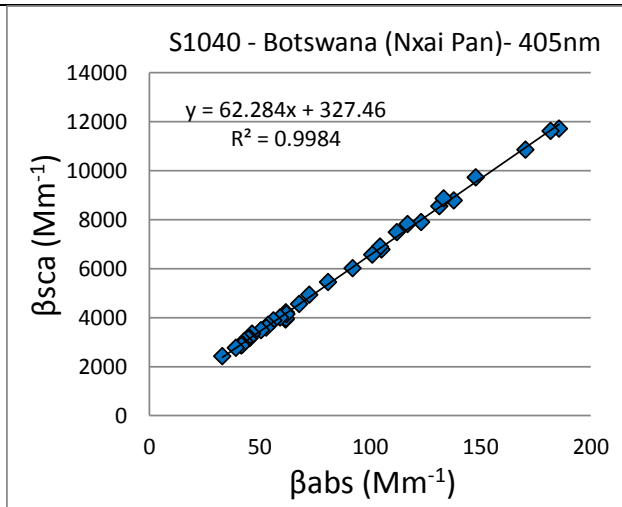

**SSA (405nm) = 0.984**

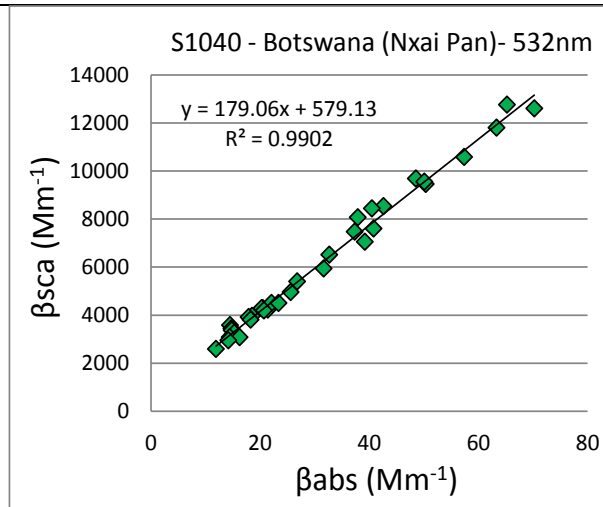

**SSA (532nm) = 0.994**

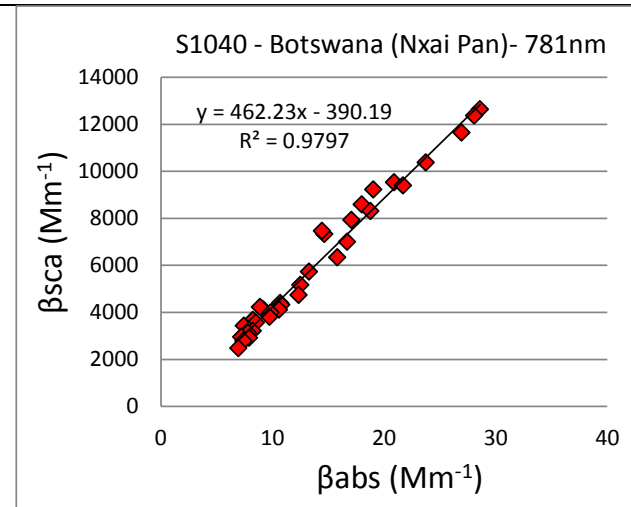

**SSA (781nm) = 0.998**

Optical scattering, absorption and single scattering albedos (SSA) at three wavelengths, where  $SSA = 1/(1 + 1/m)$  and  $m$  is the slope of the above plots.

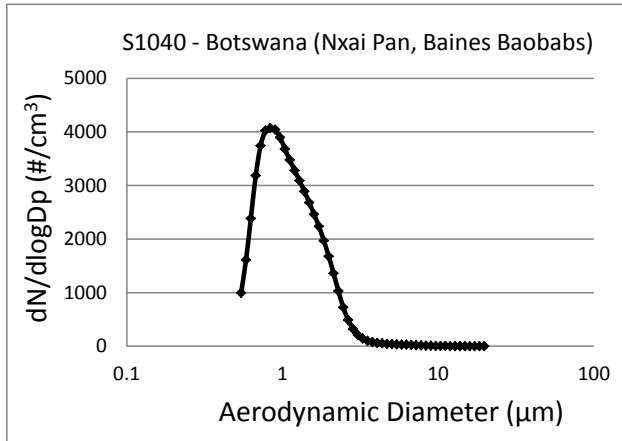

| Median            | Mean              | Geo. Mean         | Mode              | Geo. Std. Dev.    |
|-------------------|-------------------|-------------------|-------------------|-------------------|
| ( $\mu\text{m}$ ) |
| 1.040             | 1.204             | 1.095             | 0.836             | 1.516             |

| <u>Teflon Filters</u>               |       |        |       |       |
|-------------------------------------|-------|--------|-------|-------|
|                                     | PM10  | PM10   | PM2.5 | PM2.5 |
| Mass ( $\mu\text{g}$ )              | 6320  | 5330   | 1370  | 1320  |
| PM <sub>2.5</sub> /PM <sub>10</sub> | 0.22  | 0.21   | 0.26  | 0.25  |
| Average                             | 0.23  |        |       |       |
| <u>Betagaugue</u>                   |       |        |       |       |
|                                     | PM2.5 | PM10   |       |       |
| Mass ( $\mu\text{g}/\text{m}^3$ )   | 377.2 | 1317.8 |       |       |
| PM <sub>2.5</sub> /PM <sub>10</sub> | 0.29  |        |       |       |

| <u>SEM Measured Aspect Ratio</u> |                     |       |       |           |
|----------------------------------|---------------------|-------|-------|-----------|
| Sample #                         | Number of Particles | Min   | Max   | Geom Mean |
| <b>S1040</b>                     | 1392                | 1.000 | 4.227 | 1.447     |

Particle size distribution for PM<sub>2.5</sub>, as well as Teflon filter and betagaugue mass measurements, together with PM<sub>2.5</sub>/PM<sub>10</sub> ratios.

**Sample S1041, Botswana (Nxai Pan)**

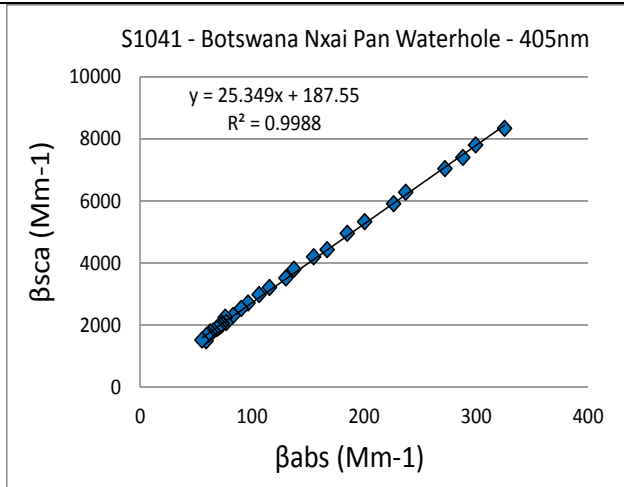

**SSA (405nm) = 0.962**

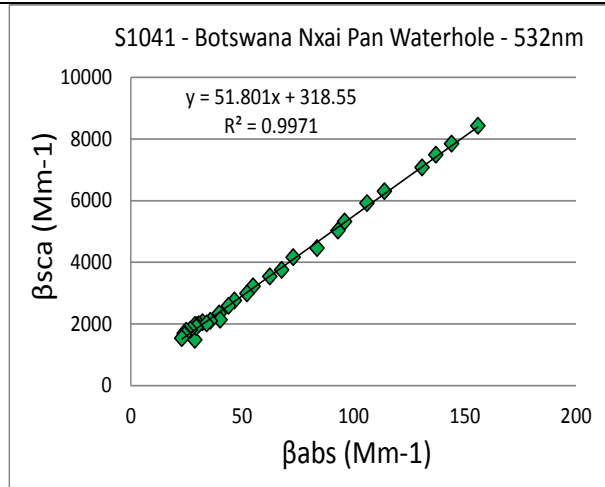

**SSA (532nm) = 0.981**

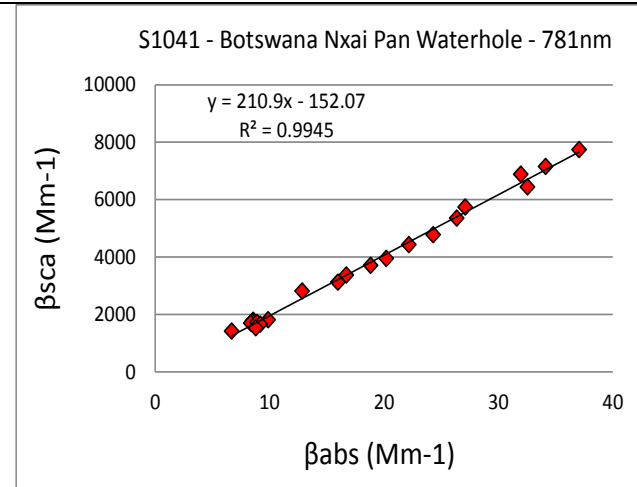

**SSA (781nm) = 0.995**

Optical scattering, absorption and single scattering albedos (SSA) at three wavelengths, where  $SSA = 1/(1 + 1/m)$  and  $m$  is the slope of the above plots.

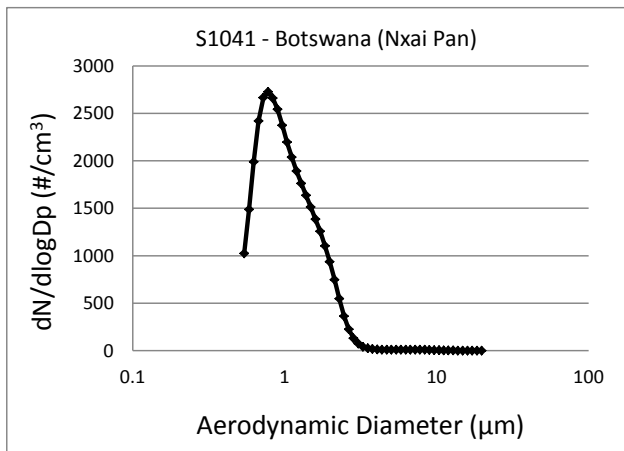

| Median            | Mean              | Geo. Mean         | Mode              | Geo. Std. Dev.    |
|-------------------|-------------------|-------------------|-------------------|-------------------|
| ( $\mu\text{m}$ ) |
| 0.967             | 1.119             | 1.024             | 0.777             | 1.494             |

| Teflon Filters                      |       |      |       |       |
|-------------------------------------|-------|------|-------|-------|
|                                     | PM10  | PM10 | PM2.5 | PM2.5 |
| Mass ( $\mu\text{g}$ )              | 5570  | 5170 | 1230  | 1220  |
| PM <sub>2.5</sub> /PM <sub>10</sub> | 0.22  | 0.22 | 0.24  | 0.24  |
| Average                             | 0.23  |      |       |       |
| Betagauge                           |       |      |       |       |
|                                     | PM2.5 |      | PM10  |       |
| Mass ( $\mu\text{g}/\text{m}^3$ )   | 190.6 |      | 806.5 |       |
| PM <sub>2.5</sub> /PM <sub>10</sub> | 0.24  |      |       |       |

**SEM Measured Aspect Ratio**

| Sample #     | Number of Particles | Min   | Max   | Geom Mean |
|--------------|---------------------|-------|-------|-----------|
| <b>S1041</b> | 1324                | 1.002 | 4.848 | 1.436     |

Particle size distribution for PM<sub>2.5</sub>, as well as Teflon filter and betagauge mass measurements, together with PM<sub>2.5</sub>/PM<sub>10</sub> ratios.

**Sample S1042, Chile (Atacama, Rock Garden)**

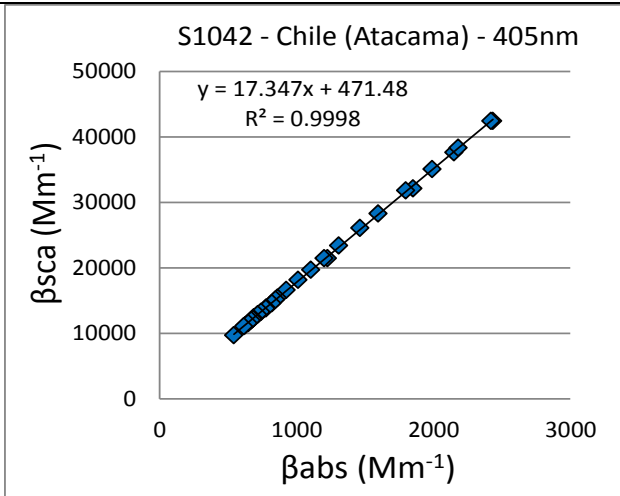

**SSA (405nm) = 0.945**

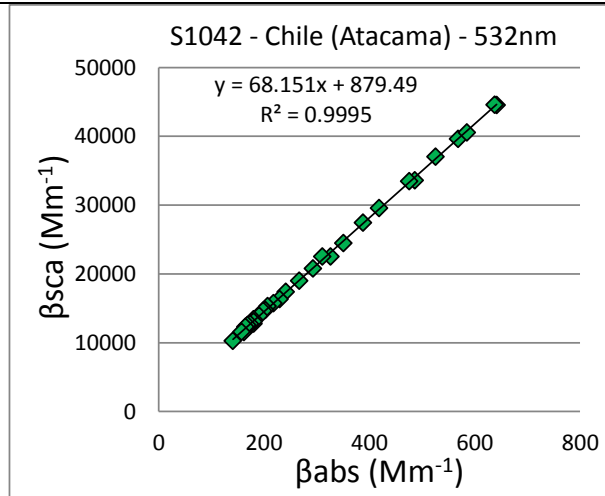

**SSA (532nm) = 0.986**

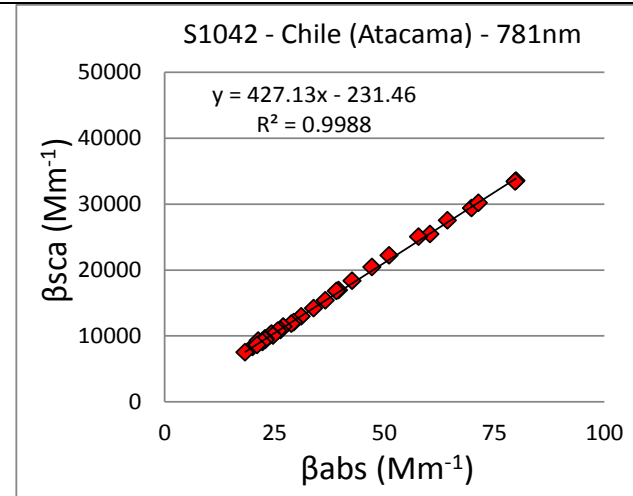

**SSA (781nm) = 0.998**

Optical scattering, absorption and single scattering albedos (SSA) at three wavelengths, where  $SSA = 1/(1 + 1/m)$  and  $m$  is the slope of the above plots.

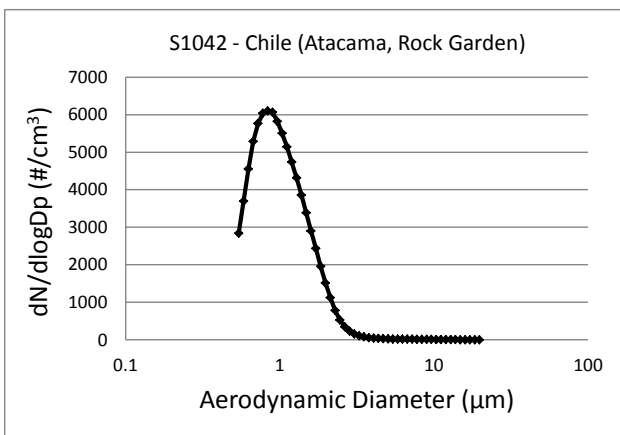

| Median<br>( $\mu\text{m}$ ) | Mean<br>( $\mu\text{m}$ ) | Geo. Mean<br>( $\mu\text{m}$ ) | Mode<br>( $\mu\text{m}$ ) | Geo. Std. Dev.<br>( $\mu\text{m}$ ) |
|-----------------------------|---------------------------|--------------------------------|---------------------------|-------------------------------------|
| 0.958                       | 1.090                     | 1.001                          | 0.836                     | 1.475                               |

| Teflon Filters                      |       |       |       |       |
|-------------------------------------|-------|-------|-------|-------|
|                                     | PM10  | PM10  | PM2.5 | PM2.5 |
| Mass ( $\mu\text{g}$ )              | 11810 | 10730 | 4350  | -     |
| PM <sub>2.5</sub> /PM <sub>10</sub> | 0.37  | 0.41  | -     | -     |
| Average                             | 0.39  |       |       |       |
| Betagauge                           |       |       |       |       |
|                                     | PM2.5 | PM10  |       |       |
| Mass ( $\mu\text{g}/\text{m}^3$ )   | 296.3 | 726.1 |       |       |
| PM <sub>2.5</sub> /PM <sub>10</sub> | 0.41  |       |       |       |

| SEM Measured Aspect Ratio |                     |       |       |           |
|---------------------------|---------------------|-------|-------|-----------|
| Sample #                  | Number of Particles | Min   | Max   | Geom Mean |
| <b>S1042</b>              | 1267                | 1.000 | 4.687 | 1.544     |

Particle size distribution for PM<sub>2.5</sub>, as well as Teflon filter and betagauge mass measurements, together with PM<sub>2.5</sub>/PM<sub>10</sub> ratios.

**Sample S1045, USA (Black Rock, NV)**

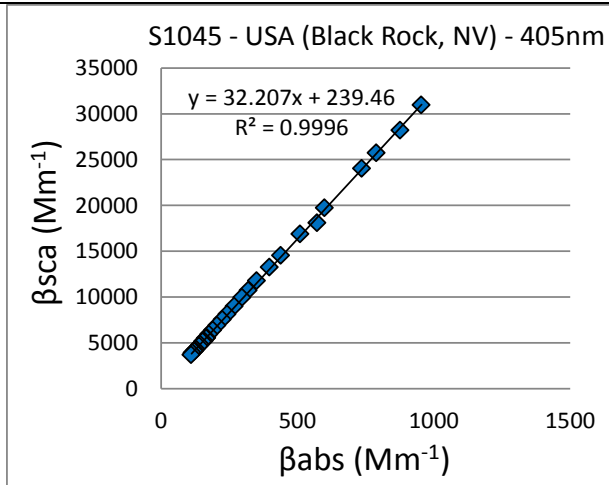

**SSA (405nm) = 0.970**

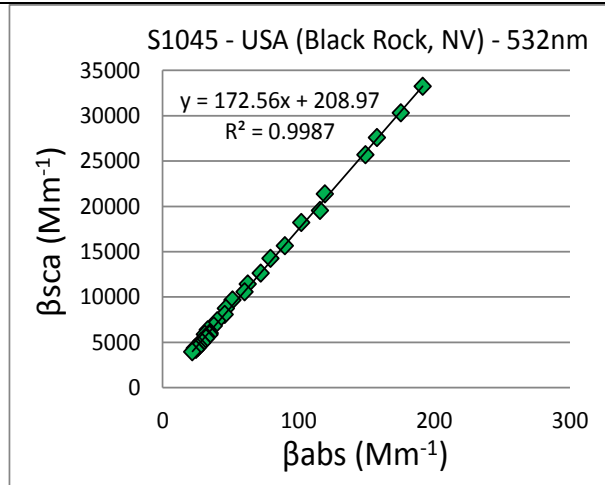

**SSA (532nm) = 0.994**

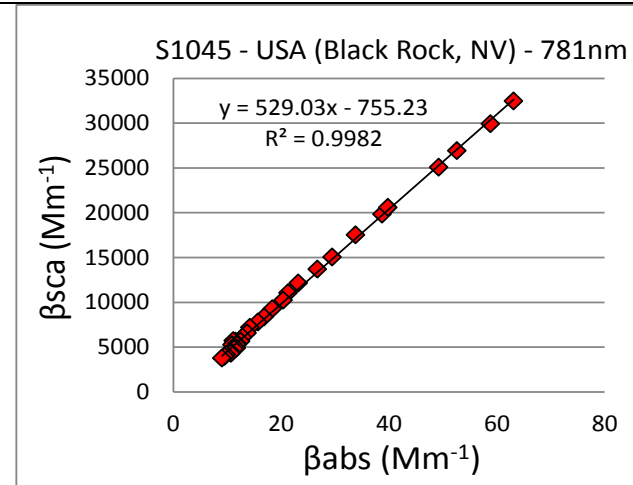

**SSA (781nm) = 0.998**

Optical scattering, absorption and single scattering albedos (SSA) at three wavelengths, where  $SSA = 1/(1 + 1/m)$  and  $m$  is the slope of the above plots.

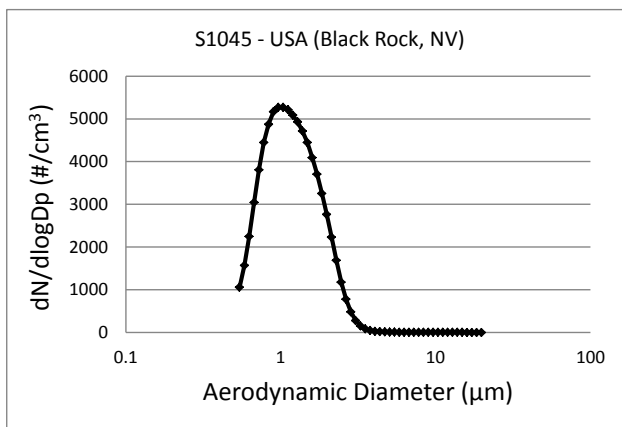

| Median<br>( $\mu\text{m}$ ) | Mean<br>( $\mu\text{m}$ ) | Geo. Mean<br>( $\mu\text{m}$ ) | Mode<br>( $\mu\text{m}$ ) | Geo. Std. Dev.<br>( $\mu\text{m}$ ) |
|-----------------------------|---------------------------|--------------------------------|---------------------------|-------------------------------------|
| 1.134                       | 1.253                     | 1.157                          | 0.994                     | 1.480                               |

| Teflon Filters                      |       |       |       |       |
|-------------------------------------|-------|-------|-------|-------|
|                                     | PM10  | PM10  | PM2.5 | PM2.5 |
| Mass ( $\mu\text{g}$ )              | 5910  | 5450  | 2590  | 2660  |
| PM <sub>2.5</sub> /PM <sub>10</sub> | 0.44  | 0.45  | 0.48  | 0.49  |
| Average                             | 0.46  |       |       |       |
| Betagauge                           |       |       |       |       |
|                                     | PM2.5 | PM10  |       |       |
| Mass ( $\mu\text{g}/\text{m}^3$ )   | 204.9 | 384.8 |       |       |
| PM <sub>2.5</sub> /PM <sub>10</sub> | 0.53  |       |       |       |

**SEM Measured Aspect Ratio**

| Sample #     | Number of Particles | Min   | Max   | Geom. Mean |
|--------------|---------------------|-------|-------|------------|
| <b>S1045</b> | 1408                | 1.000 | 3.713 | 1.443      |

Particle size distribution for PM<sub>2.5</sub>, as well as Teflon filter and betagauge mass measurements, together with PM<sub>2.5</sub>/PM<sub>10</sub> ratios.

**Sample S1049, Chad (Bodélé Depression, Sample 44)**

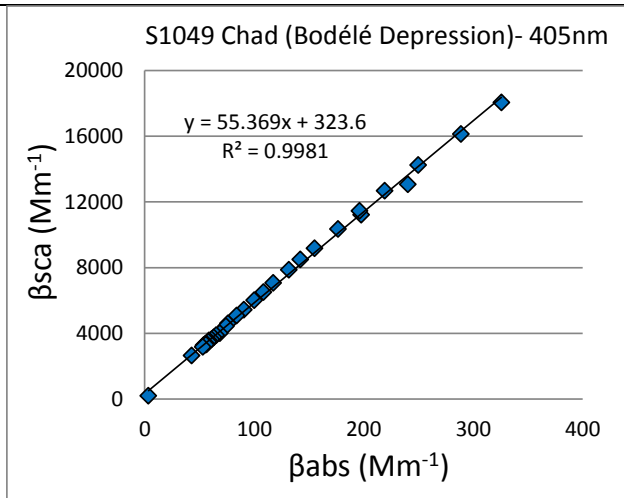

**SSA (405nm) = 0.982**

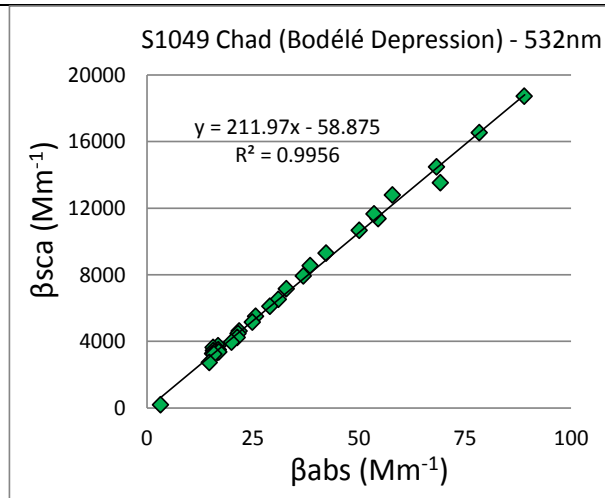

**SSA (532nm) = 0.995**

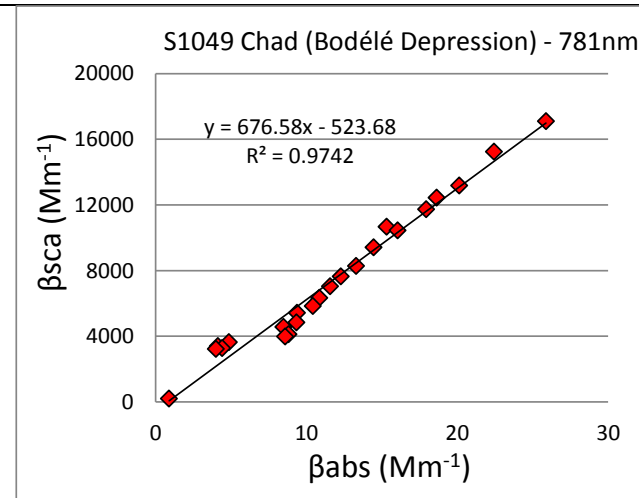

**SSA (781nm) = 0.999**

Optical scattering, absorption and single scattering albedos (SSA) at three wavelengths, where  $SSA = 1/(1 + 1/m)$  and  $m$  is the slope of the above plots.

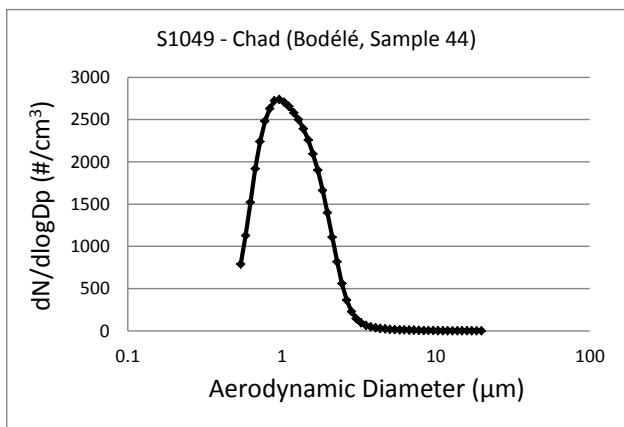

| Median<br>( $\mu\text{m}$ ) | Mean<br>( $\mu\text{m}$ ) | Geo. Mean<br>( $\mu\text{m}$ ) | Mode<br>( $\mu\text{m}$ ) | Geo. Std. Dev.<br>( $\mu\text{m}$ ) |
|-----------------------------|---------------------------|--------------------------------|---------------------------|-------------------------------------|
| 1.099                       | 1.226                     | 1.126                          | 0.955                     | 1.495                               |

|                                     | <u>Teflon Filters</u> |      |       |       |
|-------------------------------------|-----------------------|------|-------|-------|
|                                     | PM10                  | PM10 | PM2.5 | PM2.5 |
| Mass ( $\mu\text{g}$ )              | 11450                 | na   | 2970  | 2920  |
| PM <sub>2.5</sub> /PM <sub>10</sub> | 0.26                  | 0.26 | -     | -     |
| Average                             | 0.26                  |      |       |       |
|                                     | <u>Betagaugue</u>     |      |       |       |
|                                     | PM2.5                 |      | PM10  |       |
| Mass ( $\mu\text{g}/\text{m}^3$ )   | 238.2                 |      | 822.4 |       |
| PM <sub>2.5</sub> /PM <sub>10</sub> | 0.29                  |      |       |       |

**SEM Measured Aspect Ratio**

| Sample #     | Number of<br>Particles | Min   | Max   | Geom<br>Mean |
|--------------|------------------------|-------|-------|--------------|
| <b>S1049</b> | 1162                   | 1.000 | 5.213 | 1.622        |

Particle size distribution for PM<sub>2.5</sub>, as well as Teflon filter and betagaugue mass measurements, together with PM<sub>2.5</sub>/PM<sub>10</sub> ratios.



**Sample S1050, Chad (Bodélé Depression, Sample 44B)**

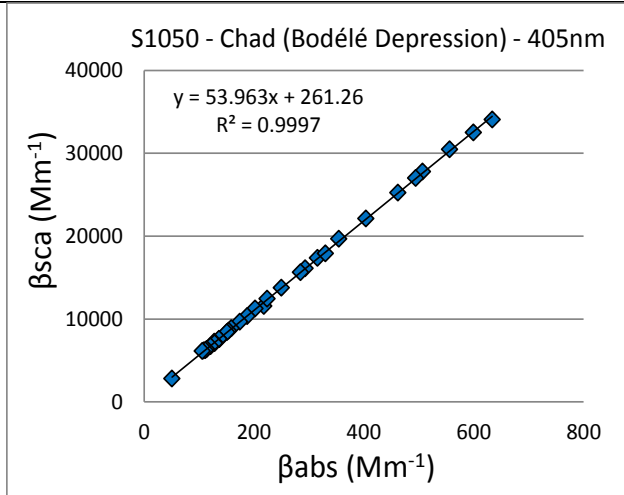

**SSA (405nm) = 0.982**

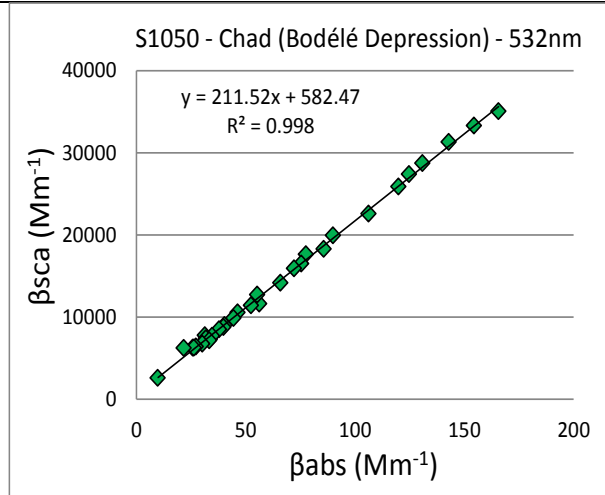

**SSA (532nm) = 0.995**

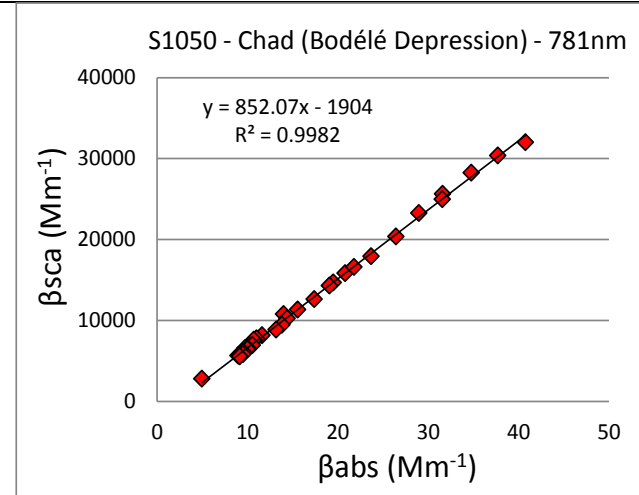

**SSA (781nm) = 0.999**

Optical scattering, absorption and single scattering albedos (SSA) at three wavelengths, where  $SSA = 1/(1 + 1/m)$  and  $m$  is the slope of the above plots.

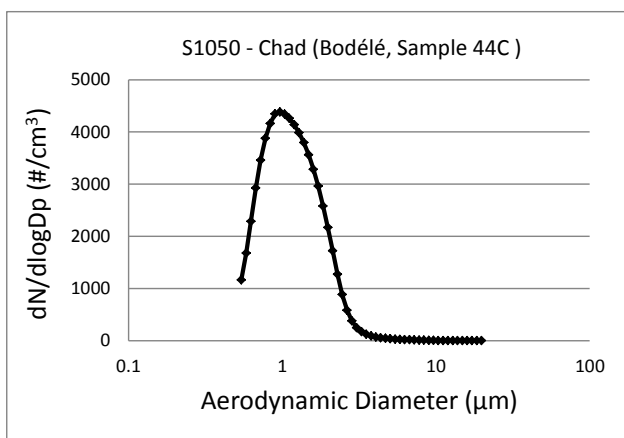

| Median<br>( $\mu\text{m}$ ) | Mean<br>( $\mu\text{m}$ ) | Geo. Mean<br>( $\mu\text{m}$ ) | Mode<br>( $\mu\text{m}$ ) | Geo. Std. Dev.<br>( $\mu\text{m}$ ) |
|-----------------------------|---------------------------|--------------------------------|---------------------------|-------------------------------------|
| 1.074                       | 1.202                     | 1.104                          | 0.933                     | 1.482                               |

| <u>Teflon Filters</u>               |        |       |         |       |
|-------------------------------------|--------|-------|---------|-------|
|                                     | PM10   | PM10  | PM2.5   | PM2.5 |
| Mass ( $\mu\text{g}$ )              | 17330  | 16190 | 4450    | 4500  |
| PM <sub>2.5</sub> /PM <sub>10</sub> | 0.26   | 0.26  | 0.27    | 0.28  |
| Average                             | 0.27   |       |         |       |
| <u>Betagaugue</u>                   |        |       |         |       |
|                                     | PM2.5  |       | PM10    |       |
| Mass ( $\mu\text{g}/\text{m}^3$ )   | 3887.2 |       | 12775.3 |       |
| PM <sub>2.5</sub> /PM <sub>10</sub> | 0.30   |       |         |       |

**SEM Measured Aspect Ratio**

| <u>Sample #</u> | <u>Number of Particles</u> | <u>Min</u> | <u>Max</u> | <u>Geom Mean</u> |
|-----------------|----------------------------|------------|------------|------------------|
| <b>S1050</b>    | 1164                       | 1.002      | 10.200     | 1.685            |

Particle size distribution for PM<sub>2.5</sub>, as well as Teflon filter and betagaugue mass measurements, together with PM<sub>2.5</sub>/PM<sub>10</sub> ratios.

**Sample S1051, Chad (Bodélé Depression, Sample 44C)**

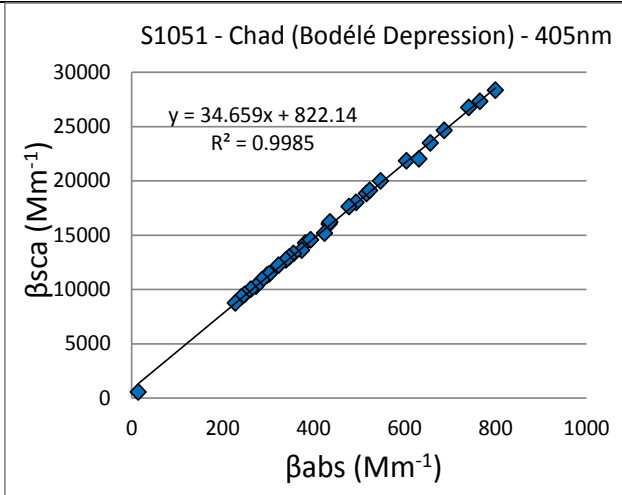

**SSA (405nm) = 0.972**

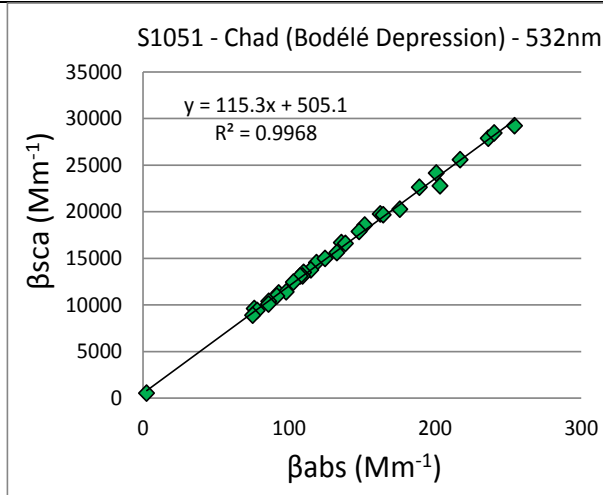

**SSA (532nm) = 0.991**

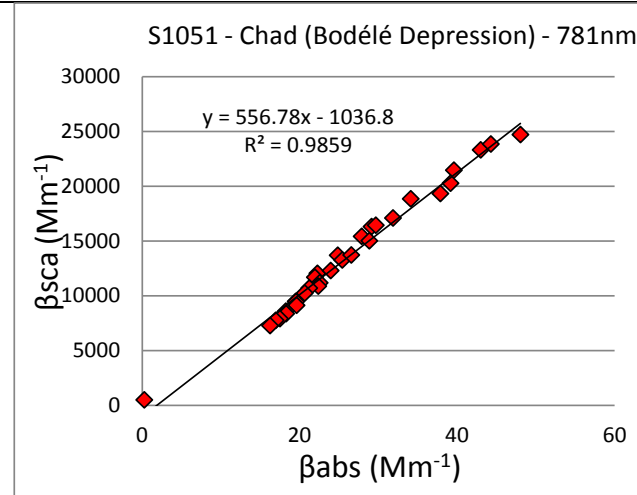

**SSA (781nm) = 0.998**

Optical scattering, absorption and single scattering albedos (SSA) at three wavelengths, where  $SSA = 1/(1 + 1/m)$  and  $m$  is the slope of the above plots.

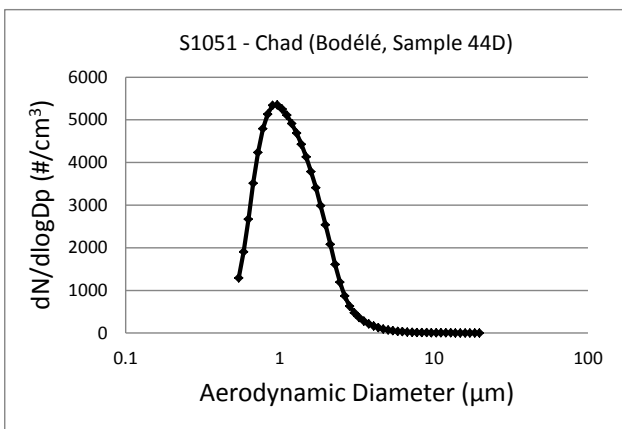

| Median<br>( $\mu\text{m}$ ) | Mean<br>( $\mu\text{m}$ ) | Geo. Mean<br>( $\mu\text{m}$ ) | Mode<br>( $\mu\text{m}$ ) | Geo. Std. Dev.<br>( $\mu\text{m}$ ) |
|-----------------------------|---------------------------|--------------------------------|---------------------------|-------------------------------------|
| 1.118                       | 1.279                     | 1.161                          | 0.949                     | 1.527                               |

| <u>Teflon Filters</u>               |       |       |       |       |
|-------------------------------------|-------|-------|-------|-------|
|                                     | PM10  | PM10  | PM2.5 | PM2.5 |
| Mass ( $\mu\text{g}$ )              | 15580 | 13940 | 4120  | 4110  |
| PM <sub>2.5</sub> /PM <sub>10</sub> | 0.26  | 0.30  | 0.26  | 0.29  |
| Average                             | 0.28  |       |       |       |
| <u>Betagaugue</u>                   |       |       |       |       |
|                                     | PM2.5 |       | PM10  |       |
| Mass ( $\mu\text{g}/\text{m}^3$ )   | 166   |       | 508.4 |       |
| PM <sub>2.5</sub> /PM <sub>10</sub> | 0.33  |       |       |       |

**SEM Measured Aspect Ratio**

| Sample #     | Number of<br>Particles | Min   | Max   | Geom<br>Mean |
|--------------|------------------------|-------|-------|--------------|
| <b>S1051</b> | 1157                   | 1.000 | 7.859 | 1.698        |

Particle size distribution for PM<sub>2.5</sub>, as well as Teflon filter and betagaugue mass measurements, together with PM<sub>2.5</sub>/PM<sub>10</sub> ratios.

**Sample S1052, USA (NW Reno, Peavine Mtn)**

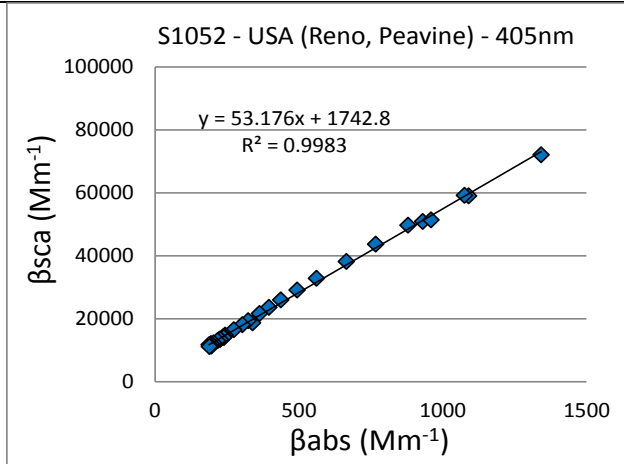

**SSA (405nm) = 0.982**

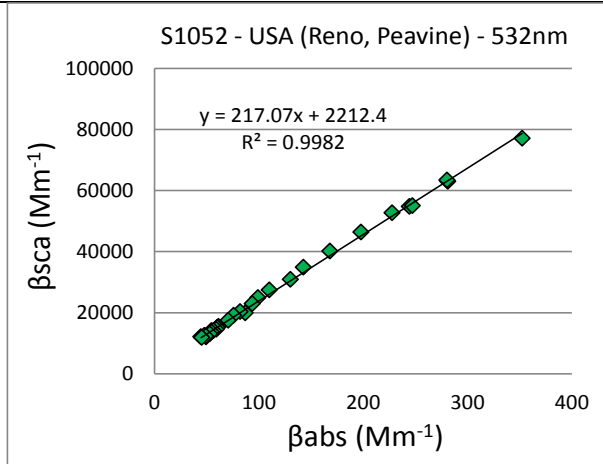

**SSA (532nm) = 0.995**

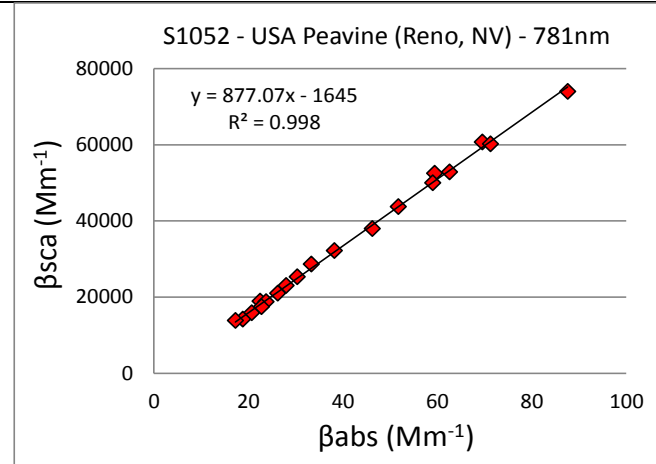

**SSA (781nm) = 0.999**

Optical scattering, absorption and single scattering albedos (SSA) at three wavelengths, where  $SSA = 1/(1 + 1/m)$  and  $m$  is the slope of the above plots.

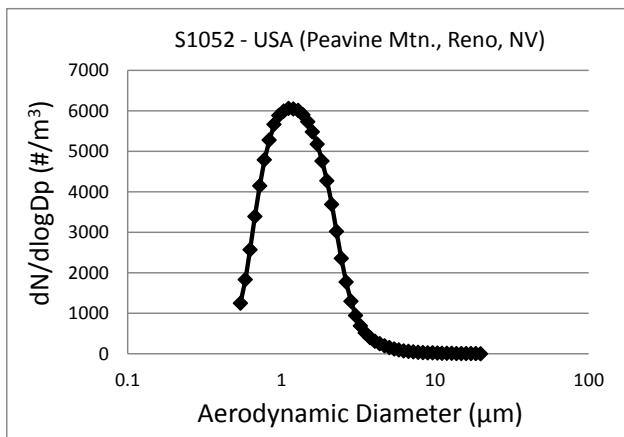

| Median<br>( $\mu\text{m}$ ) | Mean<br>( $\mu\text{m}$ ) | Geo. Mean<br>( $\mu\text{m}$ ) | Mode<br>( $\mu\text{m}$ ) | Geo. Std. Dev.<br>( $\mu\text{m}$ ) |
|-----------------------------|---------------------------|--------------------------------|---------------------------|-------------------------------------|
| 1.235                       | 1.405                     | 1.263                          | 1.130                     | 1.557                               |

|                                     | <u>Teflon Filters</u> |             |              |              |
|-------------------------------------|-----------------------|-------------|--------------|--------------|
|                                     | <u>PM10</u>           | <u>PM10</u> | <u>PM2.5</u> | <u>PM2.5</u> |
| Mass ( $\mu\text{g}$ )              | 3600                  | 5990        | 1520         | 1430         |
| PM <sub>2.5</sub> /PM <sub>10</sub> | 0.42                  | 0.40        | 0.25         | 0.24         |
| Average                             | 0.33                  |             |              |              |
|                                     | <u>Betagaugue</u>     |             |              |              |
|                                     | <u>PM2.5</u>          |             | <u>PM10</u>  |              |
| Mass ( $\mu\text{g}/\text{m}^3$ )   | 648                   |             | 1942         |              |
| PM <sub>2.5</sub> /PM <sub>10</sub> | 0.33                  |             |              |              |

**SEM Measured Aspect Ratio**

| <u>Sample #</u> | <u>Number of Particles</u> | <u>Min</u> | <u>Max</u> | <u>Geom Mean</u> |
|-----------------|----------------------------|------------|------------|------------------|
| <b>S1052</b>    | 1132                       | 1.000      | 7.222      | 1.630            |

Particle size distribution for PM<sub>2.5</sub>, as well as Teflon filter and betagaugue mass measurements, together with PM<sub>2.5</sub>/PM<sub>10</sub> ratios.

**Sample S1053, USA (Peavine Mtn. Reno, NV)**

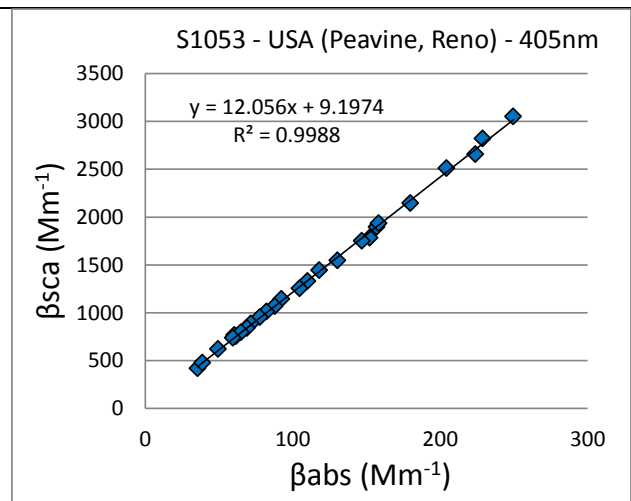

**SSA (405nm) = 0.923**

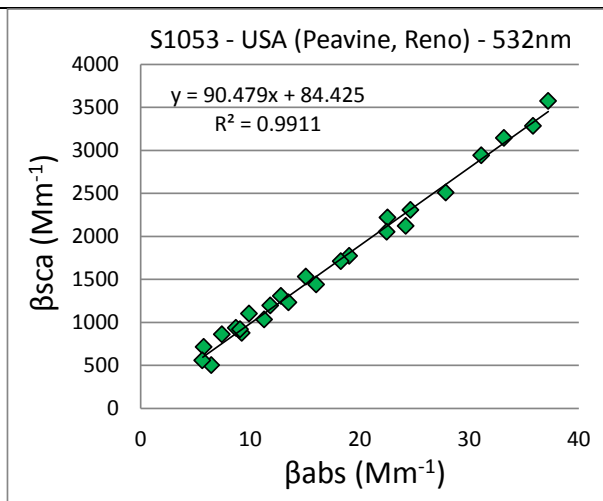

**SSA (532nm) = 0.989**

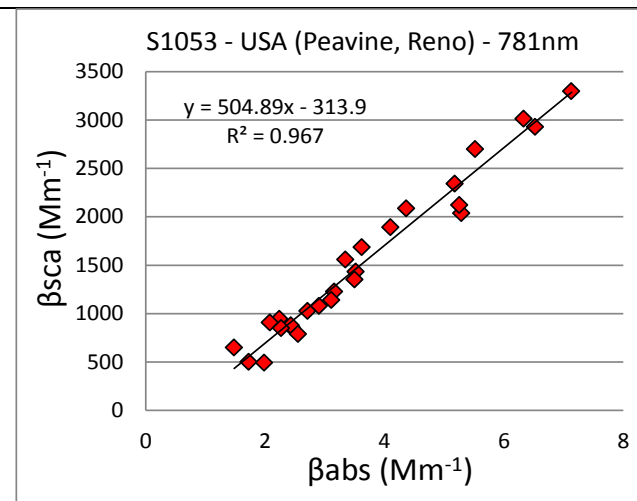

**SSA (781nm) = 0.998**

Optical scattering, absorption and single scattering albedos (SSA) at three wavelengths, where  $SSA = 1/(1 + 1/m)$  and  $m$  is the slope of the above plots.

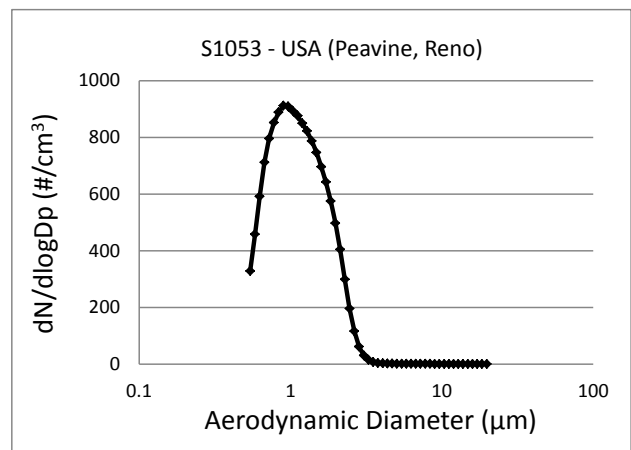

| Median<br>( $\mu\text{m}$ ) | Mean<br>( $\mu\text{m}$ ) | Geo. Mean<br>( $\mu\text{m}$ ) | Mode<br>( $\mu\text{m}$ ) | Geo. Std. Dev.<br>( $\mu\text{m}$ ) |
|-----------------------------|---------------------------|--------------------------------|---------------------------|-------------------------------------|
| 1.083                       | 1.201                     | 1.106                          | 0.947                     | 1.488                               |

| <u>Teflon Filters</u>             |       |       |        |      |
|-----------------------------------|-------|-------|--------|------|
|                                   | PM2.5 | PM2.5 | PM10   | PM10 |
| Mass ( $\mu\text{g}$ )            | 1860  | 2400  | 360    | 390  |
| PM2.5/PM10                        | 0.19  | 0.15  | 0.21   | 0.16 |
| Average                           | 0.18  |       |        |      |
| <u>Betagaugue</u>                 |       |       |        |      |
|                                   | PM2.5 |       | PM10   |      |
| Mass ( $\mu\text{g}/\text{m}^3$ ) | 512.2 |       | 2302.9 |      |
| PM2.5/PM10                        | 0.22  |       |        |      |

| <u>SEM Measured Aspect Ratio</u> |                        |       |       |              |
|----------------------------------|------------------------|-------|-------|--------------|
| Sample #                         | Number of<br>Particles | Min   | Max   | Geom<br>Mean |
| <b>S1053</b>                     | 2394                   | 1.000 | 4.467 | <b>1.411</b> |

Particle size distribution for PM<sub>2.5</sub>, as well as Teflon filter and betagaugue mass measurements, together with PM<sub>2.5</sub>/PM<sub>10</sub> ratios.

**Sample S1055, China (Lanzhou, Loess Plateau)**

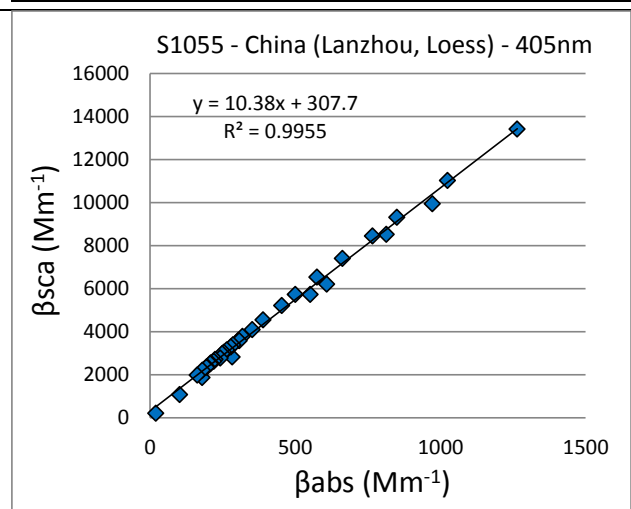

**SSA (405nm) = 0.912**

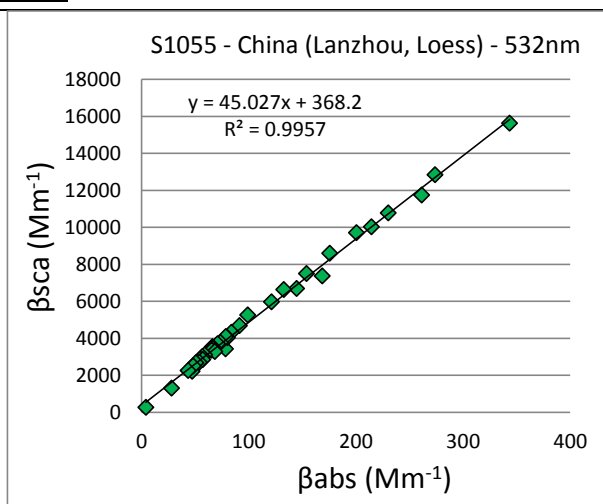

**SSA (532nm) = 0.978**

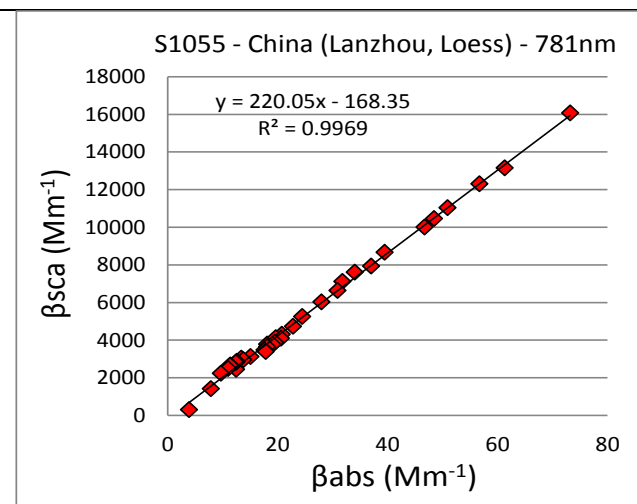

**SSA (781nm) = 0.995**

Optical scattering, absorption and single scattering albedos (SSA) at three wavelengths, where  $SSA = 1/(1 + 1/m)$  and  $m$  is the slope of the above plots.

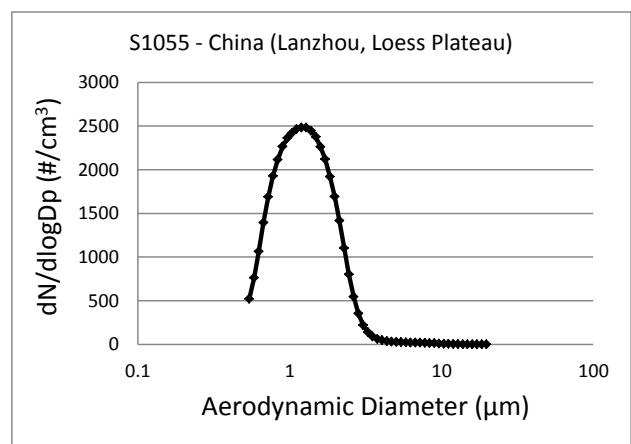

| Median<br>( $\mu\text{m}$ ) | Mean<br>( $\mu\text{m}$ ) | Geo. Mean<br>( $\mu\text{m}$ ) | Mode<br>( $\mu\text{m}$ ) | Geo. Std. Dev.<br>( $\mu\text{m}$ ) |
|-----------------------------|---------------------------|--------------------------------|---------------------------|-------------------------------------|
| 1.232                       | 1.363                     | 1.241                          | 1.231                     | 1.523                               |

| <u>Teflon Filters</u>               |       |        |       |       |
|-------------------------------------|-------|--------|-------|-------|
|                                     | PM10  | PM10   | PM2.5 | PM2.5 |
| Mass ( $\mu\text{g}$ )              | 8800  | 7720   | 1830  | 1750  |
| PM <sub>2.5</sub> /PM <sub>10</sub> | 0.21  | 0.24   | 0.20  | 0.23  |
| Average                             | 0.22  |        |       |       |
| <u>Betagaugue</u>                   |       |        |       |       |
|                                     | PM2.5 | PM10   |       |       |
| Mass ( $\mu\text{g}/\text{m}^3$ )   | 467.7 | 2461.6 |       |       |
| PM <sub>2.5</sub> /PM <sub>10</sub> | 0.19  |        |       |       |

| <u>SEM Measured Aspect Ratio</u> |                     |       |       |           |
|----------------------------------|---------------------|-------|-------|-----------|
| Sample #                         | Number of Particles | Min   | Max   | Geom Mean |
| <b>S1055</b>                     | 1316                | 1.000 | 6.889 | 1.495     |

Particle size distribution for PM<sub>2.5</sub>, as well as Teflon filter and betagaugue mass measurements, together with PM<sub>2.5</sub>/PM<sub>10</sub> ratios.

**Sample S1056, Australia (Lake Eyre, Cooper Creek)**

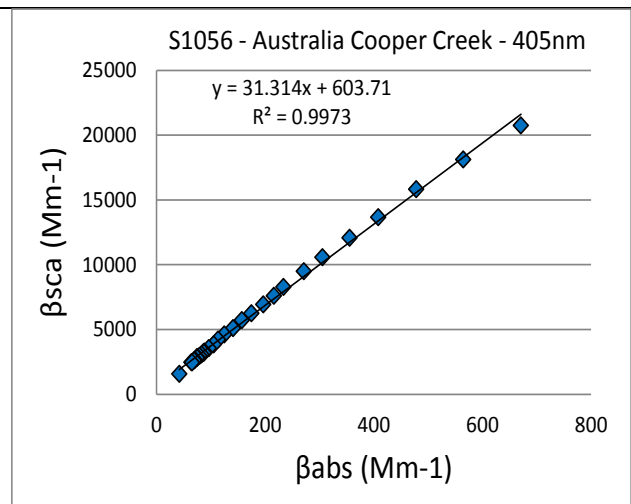

**SSA (405nm) = 0.969**

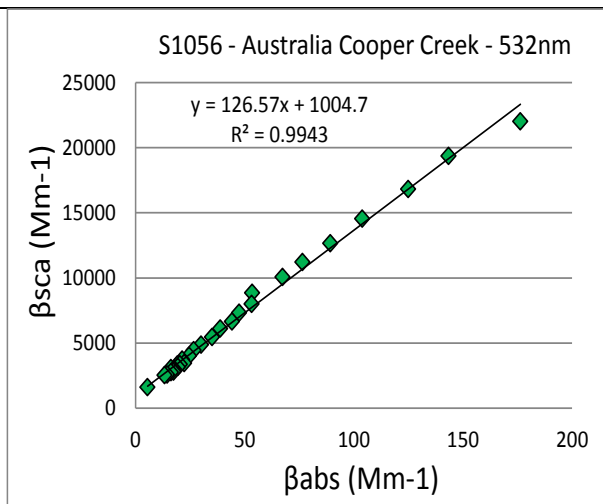

**SSA (532nm) = 0.992**

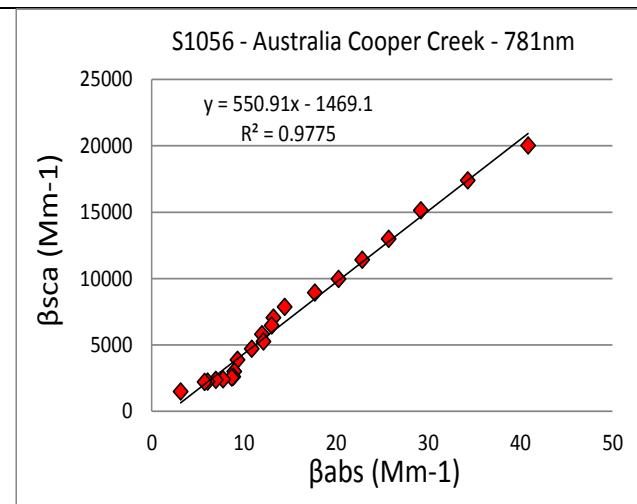

**SSA (781nm) = 0.998**

Optical scattering, absorption and single scattering albedos (SSA) at three wavelengths, where  $SSA = 1/(1 + 1/m)$  and  $m$  is the slope of the above plots.

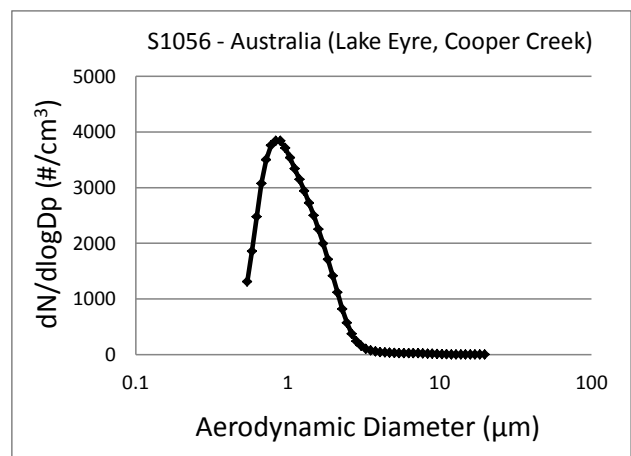

| Median            | Mean              | Geo. Mean         | Mode              | Geo. Std. Dev.    |
|-------------------|-------------------|-------------------|-------------------|-------------------|
| ( $\mu\text{m}$ ) |
| 1.013             | 1.159             | 1.060             | 0.859             | 1.495             |

| <u>Teflon Filters</u>               |       |       |       |       |
|-------------------------------------|-------|-------|-------|-------|
|                                     | PM10  | PM10  | PM2.5 | PM2.5 |
| Mass ( $\mu\text{g}$ )              | 6300  | 5700  | 1490  | 1510  |
| PM <sub>2.5</sub> /PM <sub>10</sub> | 0.24  | 0.24  | 0.26  | 0.26  |
| Average                             | 0.25  |       |       |       |
| <u>Betagaugue</u>                   |       |       |       |       |
|                                     | PM2.5 | PM10  |       |       |
| Mass ( $\mu\text{g}/\text{m}^3$ )   | 166.5 | 615.8 |       |       |
| PM <sub>2.5</sub> /PM <sub>10</sub> | 0.27  |       |       |       |

**SEM Measured Aspect Ratio**

| Sample #     | Number of Particles | Min   | Max   | Geom Mean |
|--------------|---------------------|-------|-------|-----------|
| <b>S1056</b> | 1365                | 1.000 | 5.133 | 1.476     |

Particle size distribution for PM<sub>2.5</sub>, as well as Teflon filter and betagaugue mass measurements, together with PM<sub>2.5</sub>/PM<sub>10</sub> ratios.

**Sample S1057, Australia (Lake Eyre, Warburton River)**

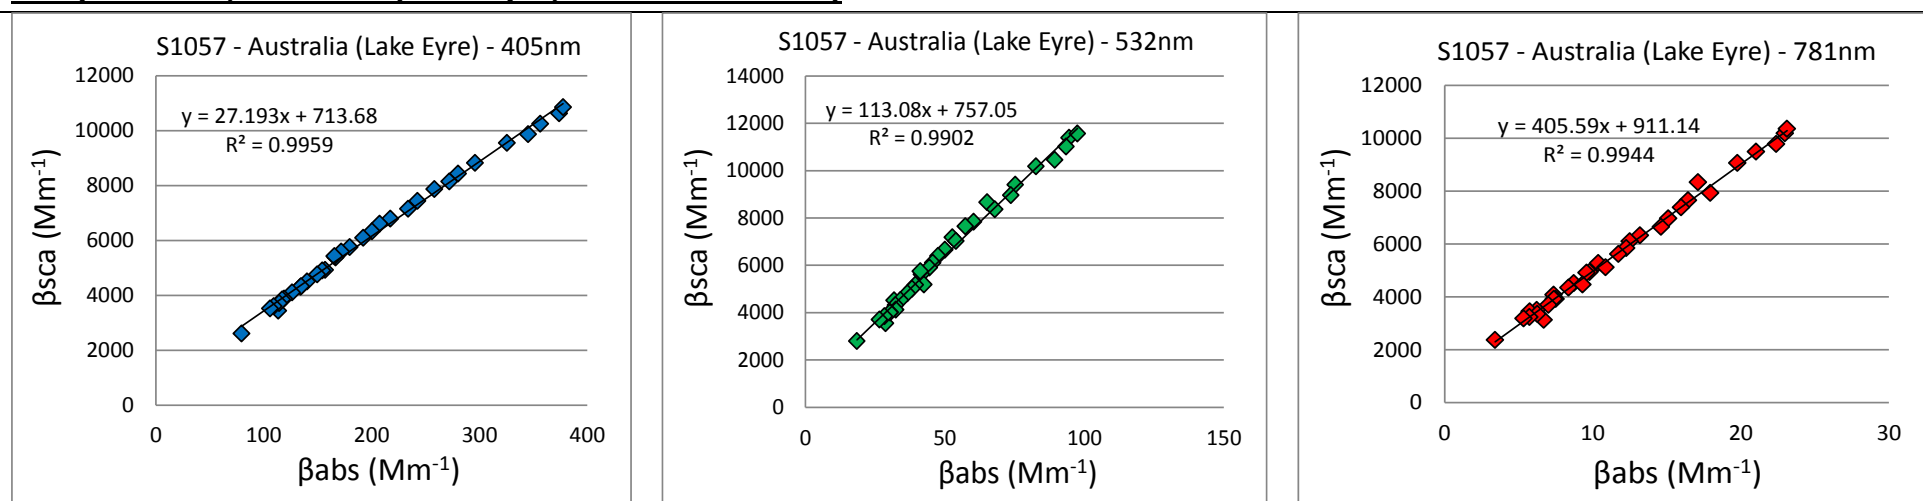

**SSA (405nm) = 0.965**

**SSA (532nm) = 0.991**

**SSA (781nm) = 0.998**

Optical scattering, absorption and single scattering albedos (SSA) at three wavelengths, where  $SSA = 1/(1 + 1/m)$  and  $m$  is the slope of the above plots.

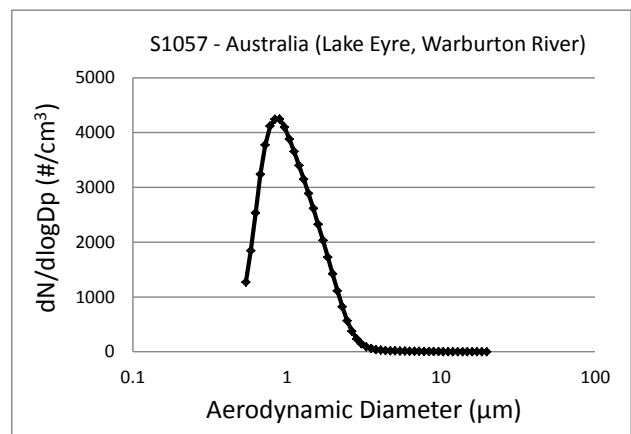

| Median<br>(µm) | Mean<br>(µm) | Geo. Mean<br>(µm) | Mode<br>(µm) | Geo. Std. Dev.<br>(µm) |
|----------------|--------------|-------------------|--------------|------------------------|
| 1.011          | 1.149        | 1.058             | 0.881        | 1.480                  |

| <u>Teflon Filters</u>               |       |       |       |       |
|-------------------------------------|-------|-------|-------|-------|
|                                     | PM10  | PM10  | PM2.5 | PM2.5 |
| Mass (µg)                           | 2240  | 2040  | 680   | 680   |
| PM <sub>2.5</sub> /PM <sub>10</sub> | 0.30  | 0.30  | 0.33  | 0.33  |
| Average                             | 0.32  |       |       |       |
| <u>Betagaugue</u>                   |       |       |       |       |
|                                     | PM2.5 | PM10  |       |       |
| Mass (µg/m <sup>3</sup> )           | 173.3 | 632.2 |       |       |
| PM <sub>2.5</sub> /PM <sub>10</sub> | 0.27  |       |       |       |

**SEM Measured Aspect Ratio**

| Sample #     | Number of Particles | Min   | Max   | Geom Mean |
|--------------|---------------------|-------|-------|-----------|
| <b>S1057</b> | 1408                | 1.005 | 3.562 | 1.440     |

Particle size distribution for PM<sub>2.5</sub>, as well as Teflon filter and betagaugue mass measurements, together with PM<sub>2.5</sub>/PM<sub>10</sub> ratios.

**Sample S1058, Australia (Lake Frome)**

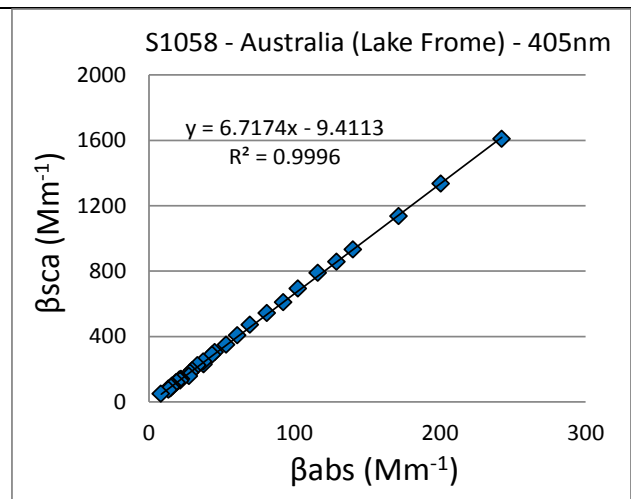

**SSA (405nm) = 0.870**

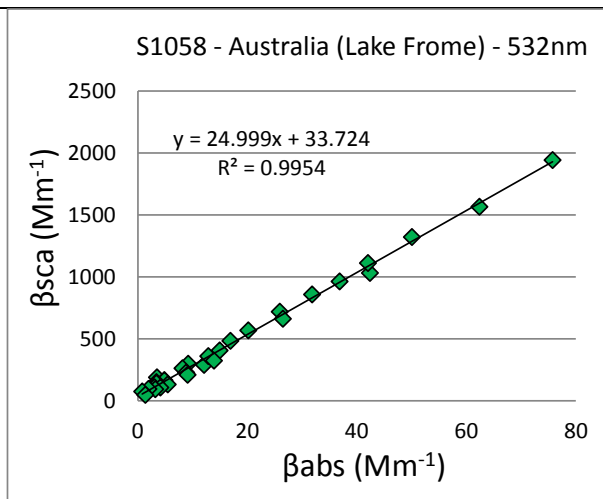

**SSA (532nm) = 0.962**

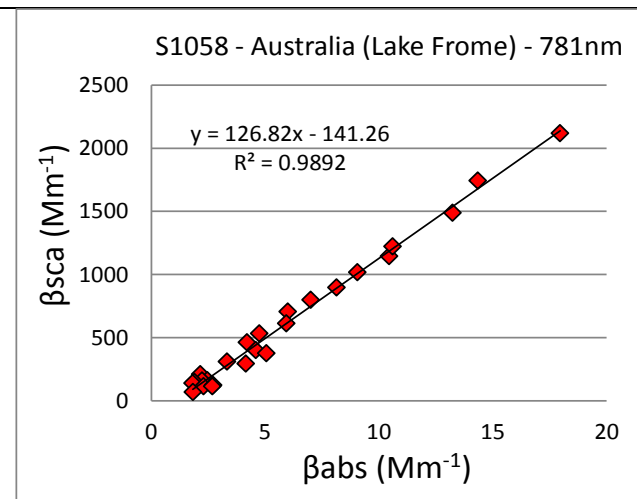

**SSA (781nm) = 0.992**

Optical scattering, absorption and single scattering albedos (SSA) at three wavelengths, where  $SSA = 1/(1 + 1/m)$  and  $m$  is the slope of the above plots.

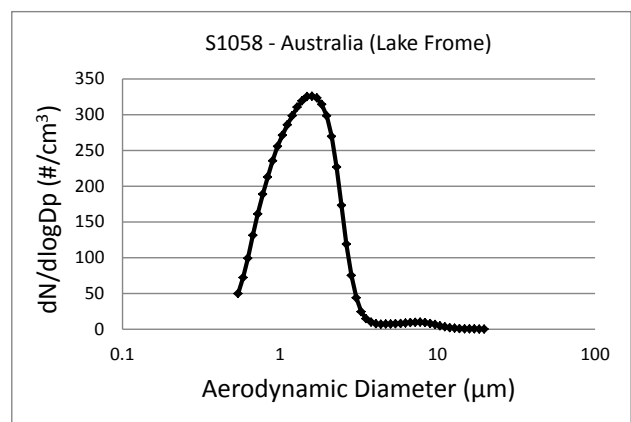

| Median<br>( $\mu\text{m}$ ) | Mean<br>( $\mu\text{m}$ ) | Geo. Mean<br>( $\mu\text{m}$ ) | Mode<br>( $\mu\text{m}$ ) | Geo. Std. Dev.<br>( $\mu\text{m}$ ) |
|-----------------------------|---------------------------|--------------------------------|---------------------------|-------------------------------------|
| 1.372                       | 1.515                     | 1.361                          | 1.526                     | 1.560                               |

| <u>Teflon Filters</u>               |       |      |        |       |
|-------------------------------------|-------|------|--------|-------|
|                                     | PM10  | PM10 | PM2.5  | PM2.5 |
| Mass ( $\mu\text{g}$ )              | 1740  | 1590 | 190    | 220   |
| PM <sub>2.5</sub> /PM <sub>10</sub> | 0.11  | 0.13 | 0.12   | 0.14  |
| Average                             | 0.12  |      |        |       |
| <u>Betagaugue</u>                   |       |      |        |       |
|                                     | PM2.5 |      | PM10   |       |
| Mass ( $\mu\text{g}/\text{m}^3$ )   | 589.5 |      | 2325.6 |       |
| PM <sub>2.5</sub> /PM <sub>10</sub> | 0.25  |      |        |       |

**SEM Measured Aspect Ratio**

| <u>Sample #</u> | <u>Number of</u> | <u>Min</u> | <u>Max</u> | <u>Geom</u> |
|-----------------|------------------|------------|------------|-------------|
|                 | <u>Particles</u> |            |            | <u>Mean</u> |
| <b>S1058</b>    | 1431             | 1.000      | 4.671      | 1.439       |

Particle size distribution for PM<sub>2.5</sub>, as well as Teflon filter and betagaugue mass measurements, together with PM<sub>2.5</sub>/PM<sub>10</sub> ratios.



**Sample S1060, Serbia (Danude R., Batajnica, Loess)**

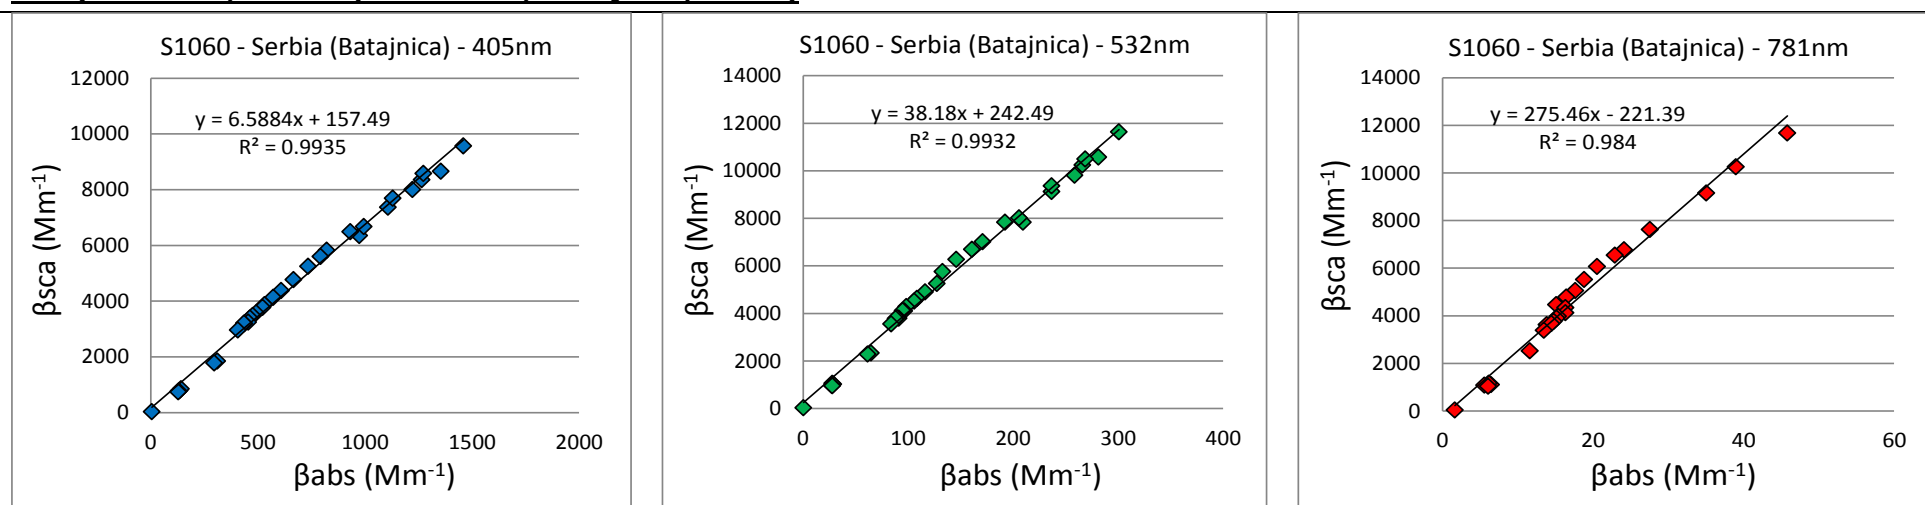

**SSA (405nm) = 0.868**

**SSA (532nm) = 0.974**

**SSA (781nm) = 0.996**

Optical scattering, absorption and single scattering albedos (SSA) at three wavelengths, where  $SSA = 1/(1 + 1/m)$  and  $m$  is the slope of the above plots.

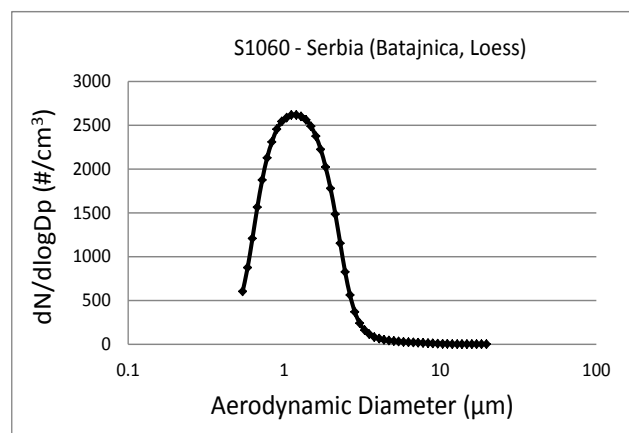

| Median (μm) | Mean (μm) | Geo. Mean (μm) | Mode (μm) | Geo. Std. Dev. (μm) |
|-------------|-----------|----------------|-----------|---------------------|
| 1.233       | 1.362     | 1.242          | 1.227     | 1.521               |

| <b>Teflon Filters</b>               |       |       |        |       |
|-------------------------------------|-------|-------|--------|-------|
|                                     | PM10  | PM10  | PM2.5  | PM2.5 |
| Mass (μg)                           | 12220 | 10150 | 2340   | 2140  |
| PM <sub>2.5</sub> /PM <sub>10</sub> | 0.19  | 0.18  | 0.23   | 0.21  |
| Average                             | 0.20  |       |        |       |
| <b>Betagaugue</b>                   |       |       |        |       |
|                                     | PM2.5 |       | PM10   |       |
| Mass (μg/m <sup>3</sup> )           | 675.5 |       | 2201.2 |       |
| PM <sub>2.5</sub> /PM <sub>10</sub> | 0.31  |       |        |       |

**SEM Measured Aspect Ratio**

| Sample #     | Number of Particles | Min   | Max   | Geom Mean |
|--------------|---------------------|-------|-------|-----------|
| <b>S1060</b> | 1357                | 1.000 | 3.414 | 1.466     |

Particle size distribution for PM<sub>2.5</sub>, as well as Teflon filter and betagaugue mass measurements, together with PM<sub>2.5</sub>/PM<sub>10</sub> ratios.

**Sample S1062, Serbia (Kostolac, Loess)**

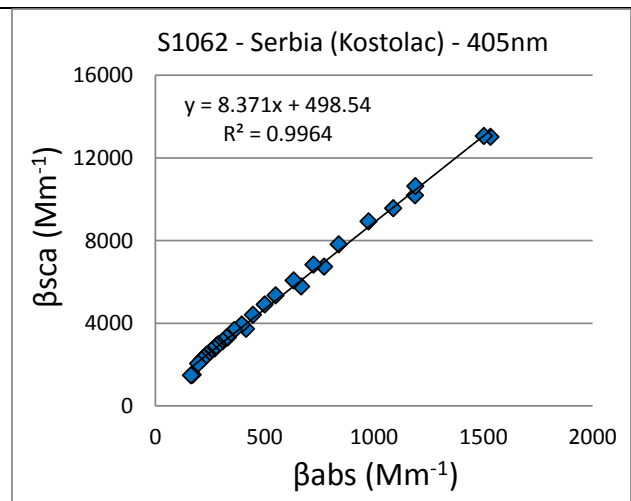

**SSA (405nm) = 0.893**

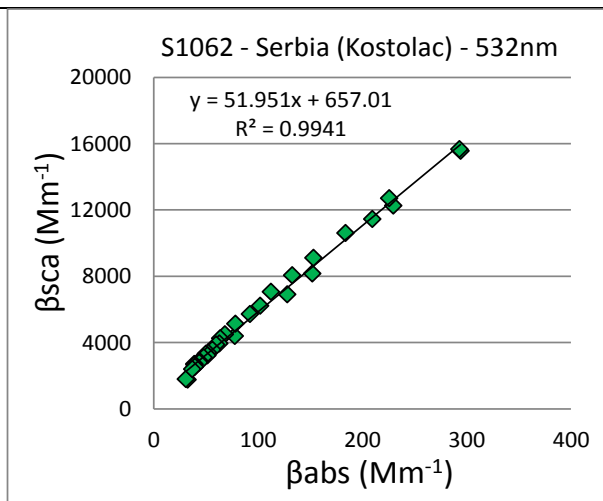

**SSA (532nm) = 0.981**

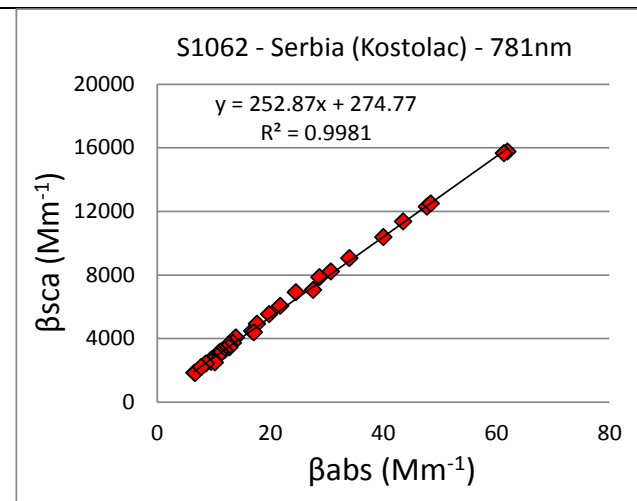

**SSA (781nm) = 0.996**

Optical scattering, absorption and single scattering albedos (SSA) at three wavelengths, where  $SSA = 1/(1 + 1/m)$  and  $m$  is the slope of the above plots.

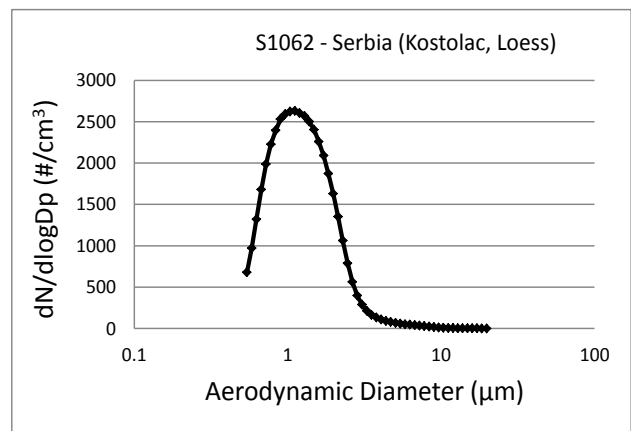

| Median<br>( $\mu\text{m}$ ) | Mean<br>( $\mu\text{m}$ ) | Geo. Mean<br>( $\mu\text{m}$ ) | Mode<br>( $\mu\text{m}$ ) | Geo. Std. Dev.<br>( $\mu\text{m}$ ) |
|-----------------------------|---------------------------|--------------------------------|---------------------------|-------------------------------------|
| 1.177                       | 1.338                     | 1.205                          | 1.103                     | 1.546                               |

| <u>Teflon Filters</u>               |       |        |       |       |
|-------------------------------------|-------|--------|-------|-------|
|                                     | PM10  | PM10   | PM2.5 | PM2.5 |
| Mass ( $\mu\text{g}$ )              | 12820 | 11410  | 2010  | -     |
| PM <sub>2.5</sub> /PM <sub>10</sub> | 0.16  | 0.18   | -     | -     |
| Average                             | 0.17  |        |       |       |
| <u>Betagaugue</u>                   |       |        |       |       |
|                                     | PM2.5 | PM10   |       |       |
| Mass ( $\mu\text{g}/\text{m}^3$ )   | 474.7 | 1416.7 |       |       |
| PM <sub>2.5</sub> /PM <sub>10</sub> | 0.34  |        |       |       |

| <u>SEM Measured Aspect Ratio</u> |                     |       |       |           |
|----------------------------------|---------------------|-------|-------|-----------|
| Sample #                         | Number of Particles | Min   | Max   | Geom Mean |
| <b>S1062</b>                     | 1315                | 1.000 | 9.629 | 1.505     |

Particle size distribution for PM<sub>2.5</sub>, as well as Teflon filter and betagaugue mass measurements, together with PM<sub>2.5</sub>/PM<sub>10</sub> ratios.

**Sample S1064, Serbia (Stari Slankamen, Loess)**

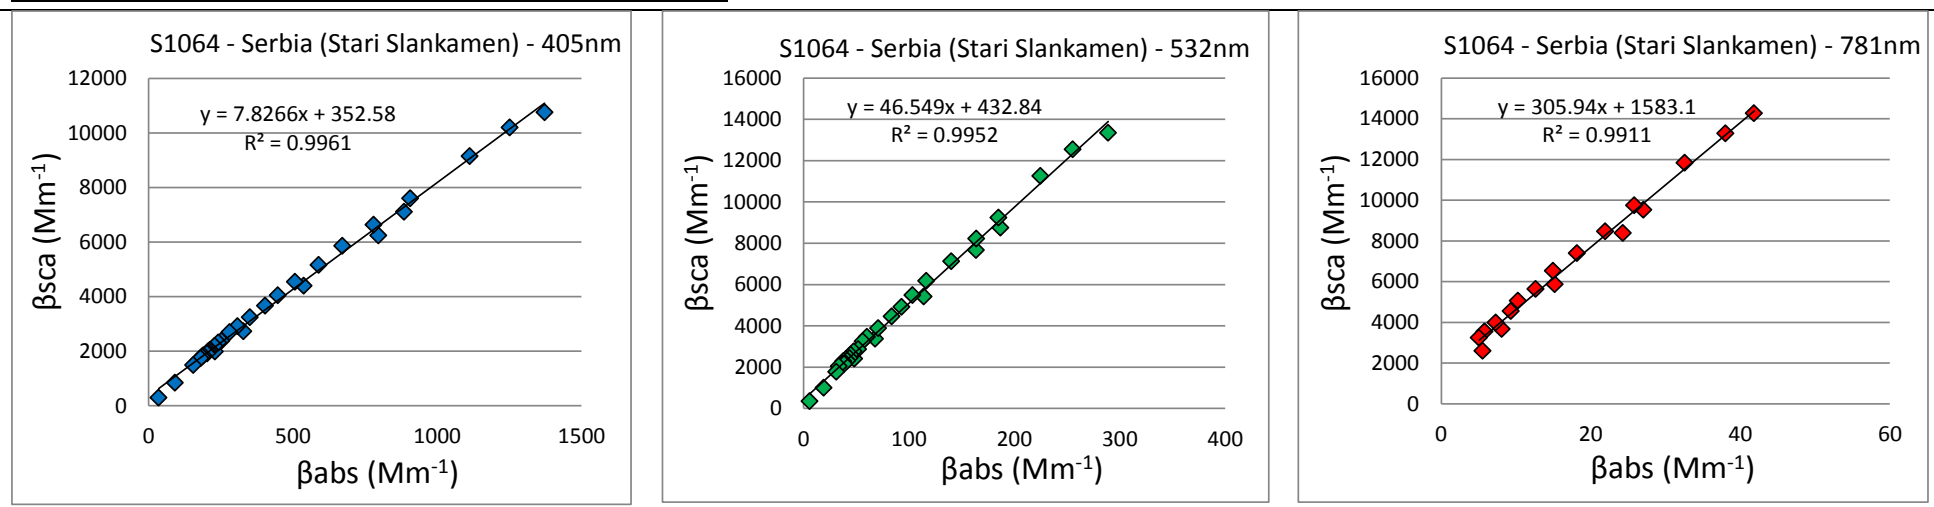

**SSA (405nm) = 0.887**

**SSA (532nm) = 0.979**

**SSA (781nm) = 0.997**

Optical scattering, absorption and single scattering albedos (SSA) at three wavelengths, where  $SSA = 1/(1 + 1/m)$  and  $m$  is the slope of the above plots.

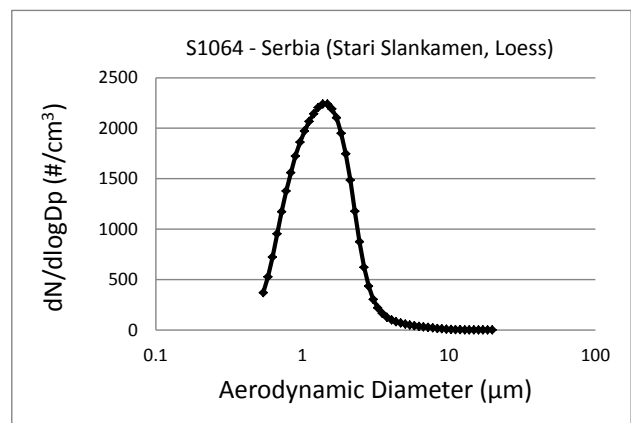

| Median (μm) | Mean (μm) | Geo. Mean (μm) | Mode (μm) | Geo. Std. Dev. (μm) |
|-------------|-----------|----------------|-----------|---------------------|
| 1.298       | 1.435     | 1.301          | 1.396     | 1.534               |

| <u>Teflon Filters</u>               |       |        |       |       |
|-------------------------------------|-------|--------|-------|-------|
|                                     | PM10  | PM10   | PM2.5 | PM2.5 |
| Mass (μg)                           | 14010 | 13670  | 2390  | 2440  |
| PM <sub>2.5</sub> /PM <sub>10</sub> | 0.17  | 0.17   | 0.17  | 0.18  |
| Average                             | 0.17  |        |       |       |
| <u>Betagaugue</u>                   |       |        |       |       |
|                                     | PM2.5 | PM10   |       |       |
| Mass (μg/m <sup>3</sup> )           | 513.7 | 1826.7 |       |       |
| PM <sub>2.5</sub> /PM <sub>10</sub> | 0.28  |        |       |       |

**SEM Measured Aspect Ratio**

| Sample #     | Number of Particles | Min   | Max   | Geom Mean |
|--------------|---------------------|-------|-------|-----------|
| <b>S1064</b> | 1330                | 1.010 | 4.125 | 1.446     |

Particle size distribution for PM<sub>2.5</sub>, as well as Teflon filter and betagaugue mass measurements, together with PM<sub>2.5</sub>/PM<sub>10</sub> ratios.

**Sample S1065, USA (Amador Cty, California), Carbondale Red clay**

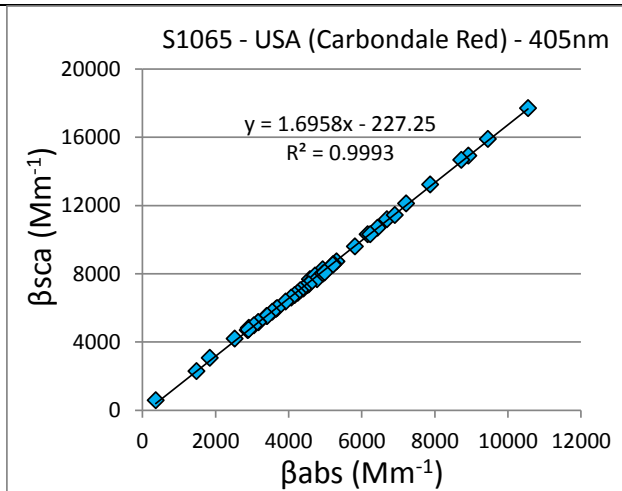

**SSA (405nm) = 0.629**

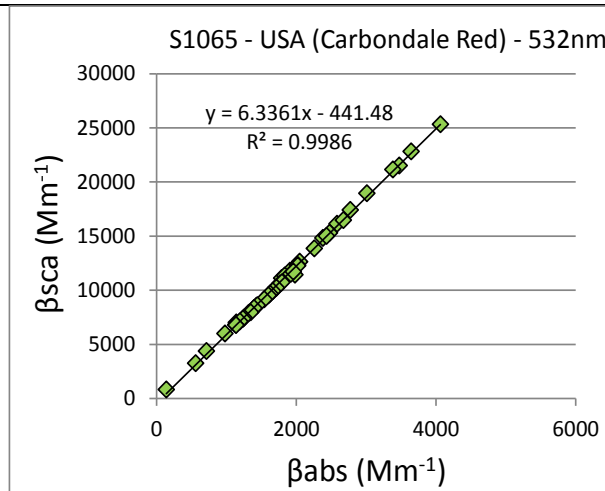

**SSA (532nm) = 0.864**

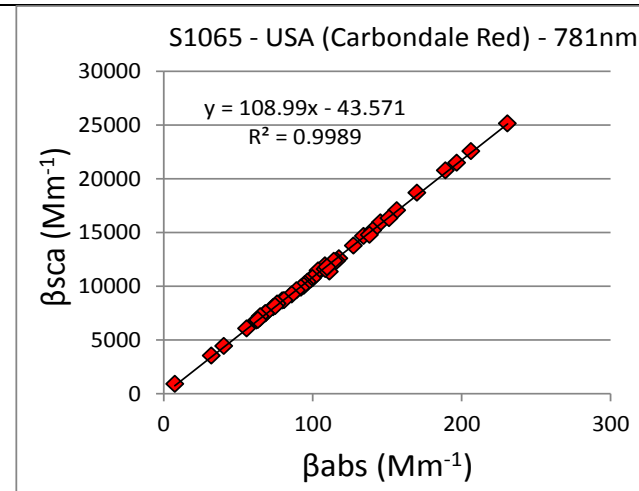

**SSA (781nm) = 0.991**

Optical scattering, absorption and single scattering albedos (SSA) at three wavelengths, where  $SSA = 1/(1 + 1/m)$  and  $m$  is the slope of the above plots.

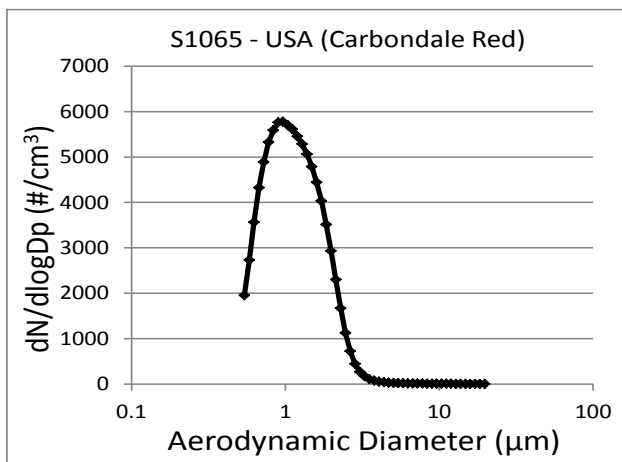

| Median            | Mean              | Geo. Mean         | Mode              | Geo. Std. Dev.    |
|-------------------|-------------------|-------------------|-------------------|-------------------|
| ( $\mu\text{m}$ ) |
| 1.092             | 1.221             | 1.119             | 0.936             | 1.503             |

|                                     | <u>Teflon Filters</u> |             |              |              |
|-------------------------------------|-----------------------|-------------|--------------|--------------|
|                                     | <u>PM10</u>           | <u>PM10</u> | <u>PM2.5</u> | <u>PM2.5</u> |
| Mass ( $\mu\text{g}$ )              | 1260                  | 1200        | 490          | 450          |
| PM <sub>2.5</sub> /PM <sub>10</sub> | 0.39                  | 0.36        | 0.41         | 0.38         |
| Average                             | 0.38                  |             |              |              |
|                                     | <u>Betagaugue</u>     |             |              |              |
|                                     | <u>PM2.5</u>          | <u>PM10</u> |              |              |
| Mass ( $\mu\text{g}/\text{m}^3$ )   | 965                   | 2331        |              |              |
| PM <sub>2.5</sub> /PM <sub>10</sub> | 0.41                  |             |              |              |

**SEM Measured Aspect Ratio**

| <u>Sample #</u> | <u>Number of</u> | <u>Min</u> | <u>Max</u> | <u>Geom</u> |
|-----------------|------------------|------------|------------|-------------|
|                 | <u>Particles</u> |            |            | <u>Mean</u> |
| <b>S1065</b>    | 1318             | 1.000      | 4.200      | 1.478       |

Particle size distribution for PM<sub>2.5</sub>, as well as Teflon filter and betagaugue mass measurements, together with PM<sub>2.5</sub>/PM<sub>10</sub> ratios.

**Sample S1066, USA (Arizona Road Dust)**

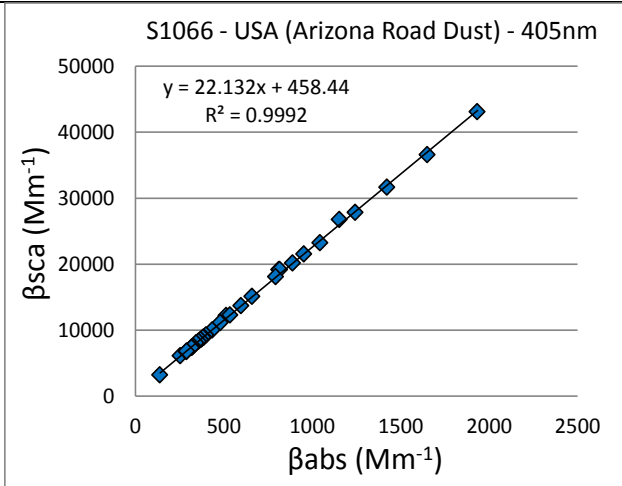

**SSA (405nm) = 0.957**

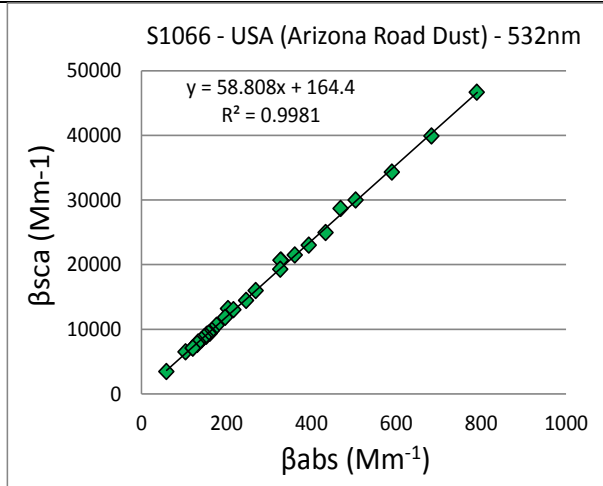

**SSA (532nm) = 0.983**

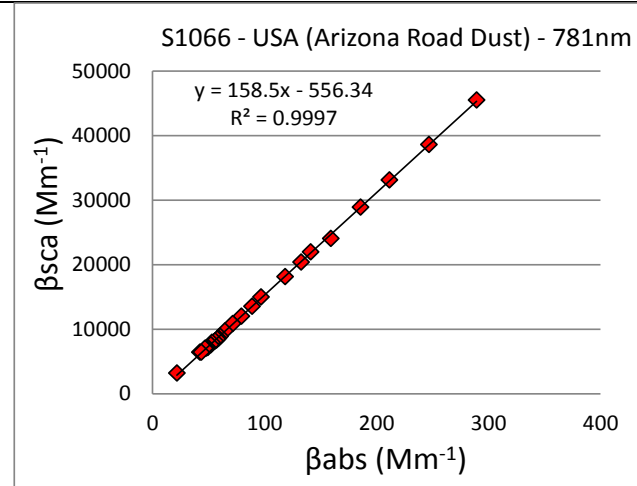

**SSA (781nm) = 0.994**

Optical scattering, absorption and single scattering albedos (SSA) at three wavelengths, where  $SSA = 1/(1 + 1/m)$  and  $m$  is the slope of the above plots.

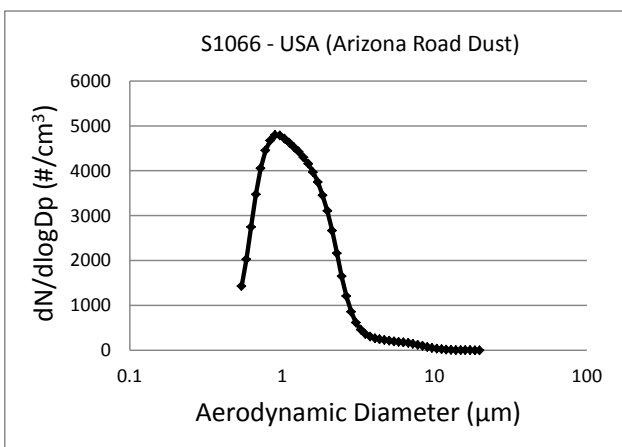

| Median            | Mean              | Geo. Mean         | Mode              | Geo. Std. Dev.    |
|-------------------|-------------------|-------------------|-------------------|-------------------|
| ( $\mu\text{m}$ ) |
| 1.166             | 1.389             | 1.219             | 0.926             | 1.607             |

| <u>Teflon Filters</u>               |              |             |              |              |
|-------------------------------------|--------------|-------------|--------------|--------------|
|                                     | <u>PM10</u>  | <u>PM10</u> | <u>PM2.5</u> | <u>PM2.5</u> |
| Mass ( $\mu\text{g}$ )              | 30590        | 25650       | 4420         | 4210         |
| PM <sub>2.5</sub> /PM <sub>10</sub> | 0.14         | 0.14        | 0.17         | 0.16         |
| Average                             | 0.15         |             |              |              |
| <u>Betagaugue</u>                   |              |             |              |              |
|                                     | <u>PM2.5</u> | <u>PM10</u> |              |              |
| Mass ( $\mu\text{g}/\text{m}^3$ )   | 226.3        | 1101.1      |              |              |
| PM <sub>2.5</sub> /PM <sub>10</sub> | 0.21         |             |              |              |

| <u>SEM Measured Aspect Ratio</u> |                  |            |            |             |
|----------------------------------|------------------|------------|------------|-------------|
| <u>Sample #</u>                  | <u>Number of</u> | <u>Min</u> | <u>Max</u> | <u>Geom</u> |
|                                  | <u>Particles</u> |            |            | <u>Mean</u> |
| <b>S1066</b>                     | 1331             | 1.000      | 4.807      | 1.616       |

Particle size distribution for PM<sub>2.5</sub>, as well as Teflon filter and betagaugue mass measurements, together with PM<sub>2.5</sub>/PM<sub>10</sub> ratios.

**Sample S2001, Djibouti (Camp Lemonnier)**

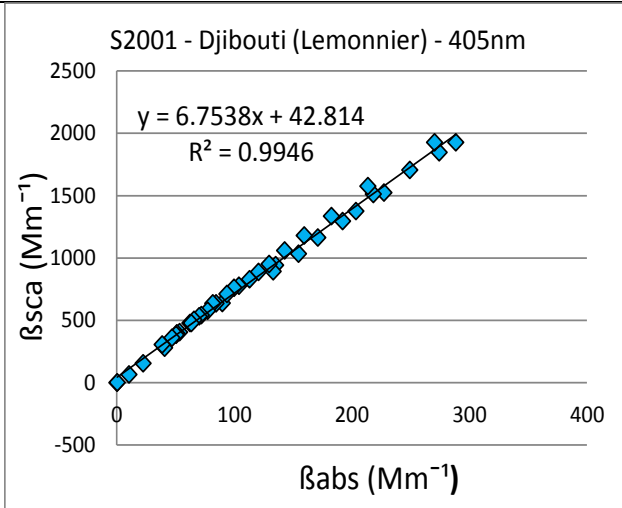

**SSA (405nm) = 0.871**

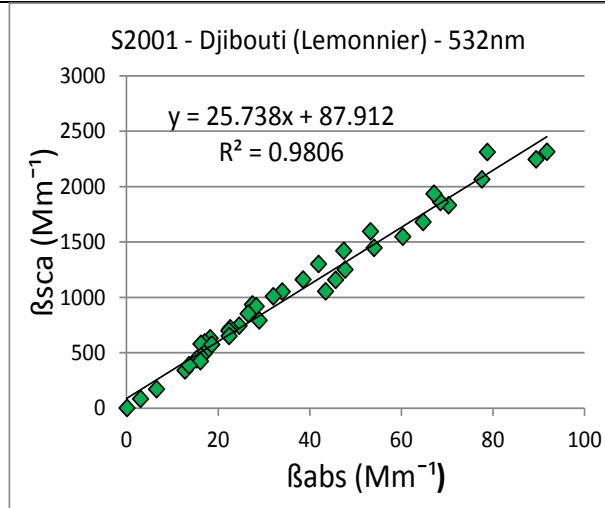

**SSA (532nm) = 0.963**

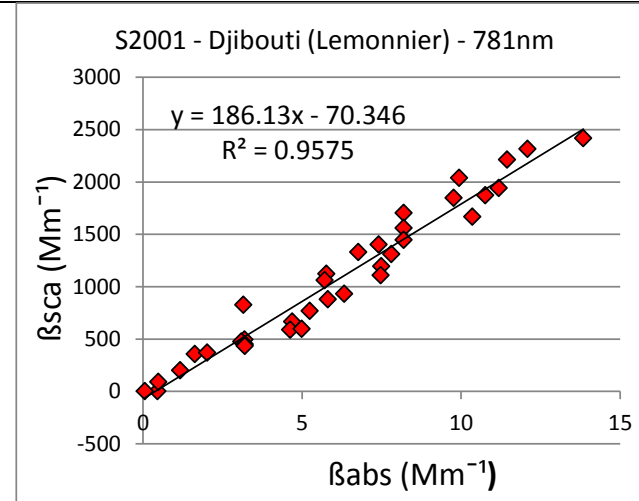

**SSA (781nm) = 0.995**

Optical scattering, absorption and single scattering albedos (SSA) at three wavelengths, where  $SSA = 1/(1 + 1/m)$  and  $m$  is the slope of the above plots.

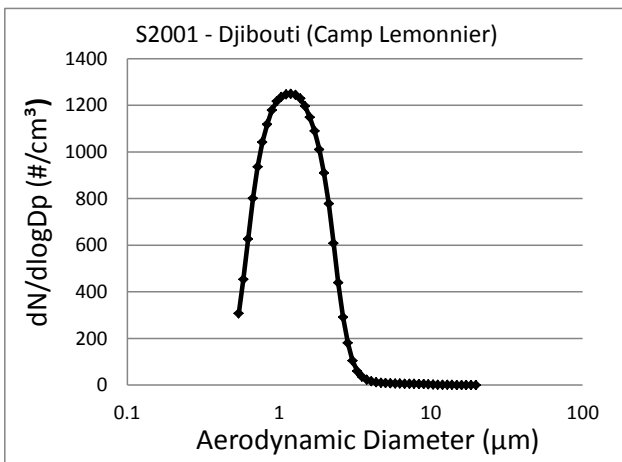

| Median<br>( $\mu\text{m}$ ) | Mean<br>( $\mu\text{m}$ ) | Geo. Mean<br>( $\mu\text{m}$ ) | Mode<br>( $\mu\text{m}$ ) | Geo. Std. Dev.<br>( $\mu\text{m}$ ) |
|-----------------------------|---------------------------|--------------------------------|---------------------------|-------------------------------------|
| 1.213                       | 1.339                     | 1.223                          | 1.210                     | 1.523                               |

|                                   | <u>Teflon Filters</u> |        |        |        |
|-----------------------------------|-----------------------|--------|--------|--------|
|                                   | PM 10                 | PM 10  | PM 2.5 | PM 2.5 |
| Mass ( $\mu\text{g}$ )            | 2990                  | 2660   | 670    | 620    |
| PM2.5/PM10                        | 0.22                  | 0.21   | 0.25   | 0.23   |
| Average                           | 0.23                  |        |        |        |
|                                   |                       |        |        |        |
|                                   |                       |        |        |        |
|                                   | <u>Betagaugue</u>     |        |        |        |
|                                   | PM2.5                 | PM10   |        |        |
| Mass ( $\mu\text{g}/\text{m}^3$ ) | 736.4                 | 3004.3 |        |        |
| PM2.5/PM10                        | 0.25                  |        |        |        |

| <u>SEM Measured Aspect Ratio</u> |                        |       |       |              |
|----------------------------------|------------------------|-------|-------|--------------|
| Sample #                         | Number of<br>Particles | Min   | Max   | Geom<br>Mean |
| <b>S2001</b>                     | 1382                   | 1.000 | 4.208 | 1.442        |

Particle size distribution for  $\text{PM}_{2.5}$ , as well as Teflon filter and betagaugue mass measurements, together with  $\text{PM}_{2.5}/\text{PM}_{10}$  ratios.

**Sample S2002, Afghanistan (Bagram)**

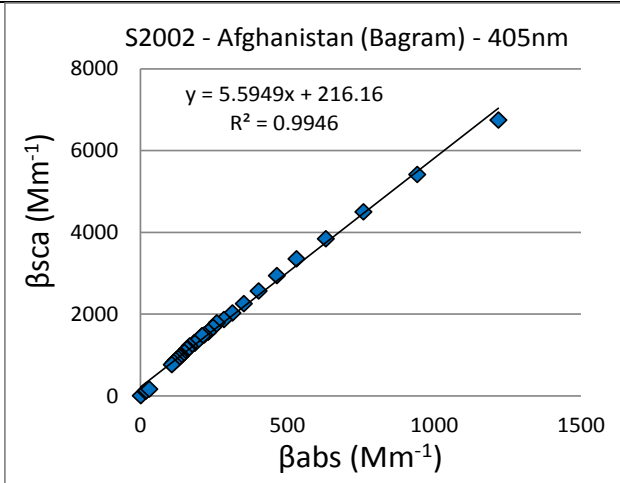

**SSA (405nm) = 0.848**

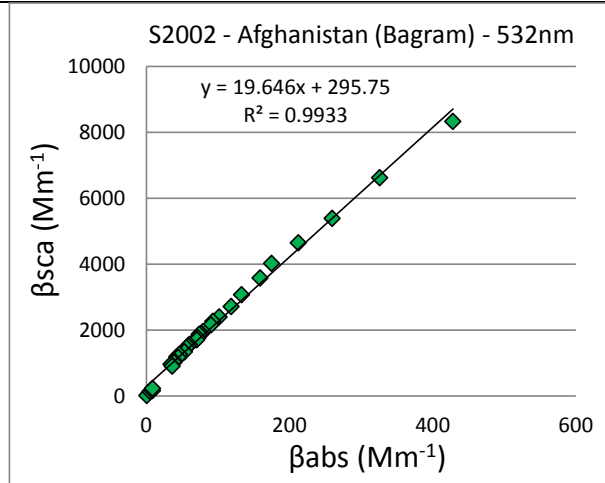

**SSA (532nm) = 0.952**

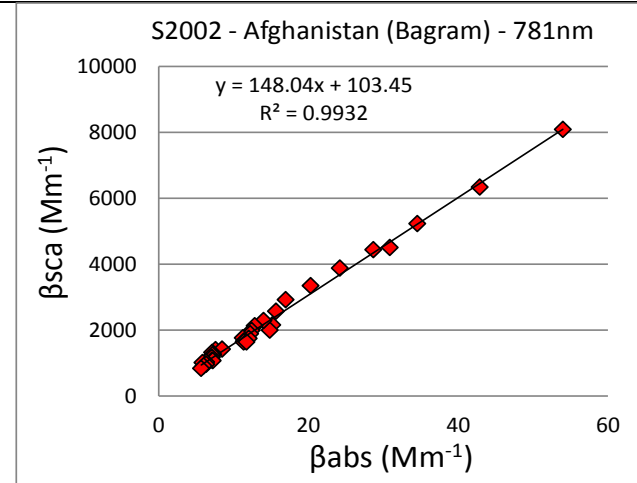

**SSA (781nm) = 0.993**

Optical scattering, absorption and single scattering albedos (SSA) at three wavelengths, where  $SSA = 1/(1 + 1/m)$  and  $m$  is the slope of the above plots.

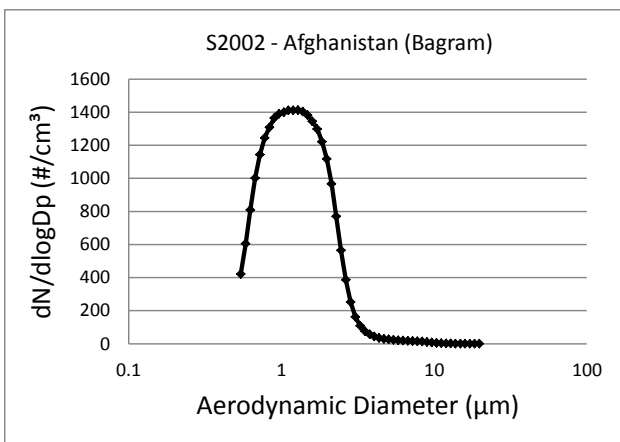

| Median      | Mean        | Geo. Mean   | Mode        | Geo. Std. Dev. |
|-------------|-------------|-------------|-------------|----------------|
| ( $\mu m$ )    |
| 1.252       | 1.393       | 1.258       | 1.258       | 1.553          |

| <u>Teflon Filters</u>               |              |             |              |              |
|-------------------------------------|--------------|-------------|--------------|--------------|
|                                     | <u>PM10</u>  | <u>PM10</u> | <u>PM2.5</u> | <u>PM2.5</u> |
| Mass ( $\mu g$ )                    | 2230         | 5430        | 980          | 960          |
| PM <sub>2.5</sub> /PM <sub>10</sub> | 0.44         | 0.43        | 0.18         | 0.18         |
| Average                             | 0.31         |             |              |              |
|                                     |              |             |              |              |
| <u>Betagaugue</u>                   |              |             |              |              |
|                                     | <u>PM2.5</u> |             | <u>PM10</u>  |              |
| Mass ( $\mu g/m^3$ )                | 730.3        |             | 4151.4       |              |
| PM <sub>2.5</sub> /PM <sub>10</sub> | 0.18         |             |              |              |

Particle size distribution for PM<sub>2.5</sub>, as well as Teflon filter and betagaugue mass measurements, together with PM<sub>2.5</sub>/PM<sub>10</sub> ratios.

**Sample S2003, Afghanistan (Khowst)**

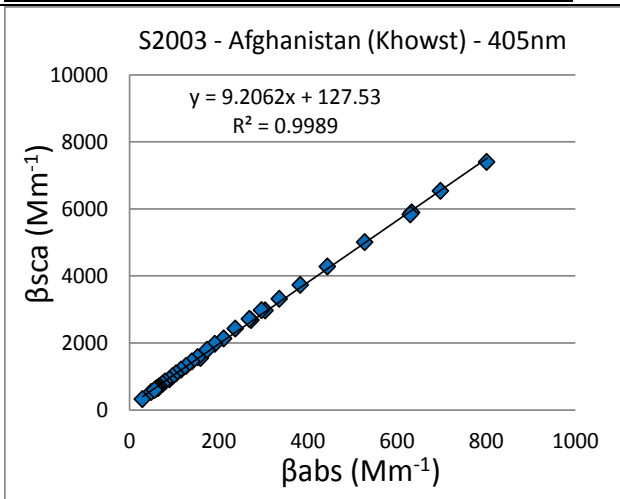

**SSA (405nm) = 0.902**

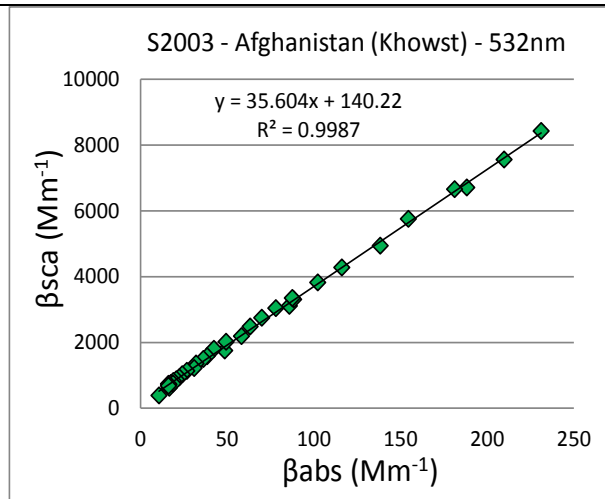

**SSA (532nm) = 0.973**

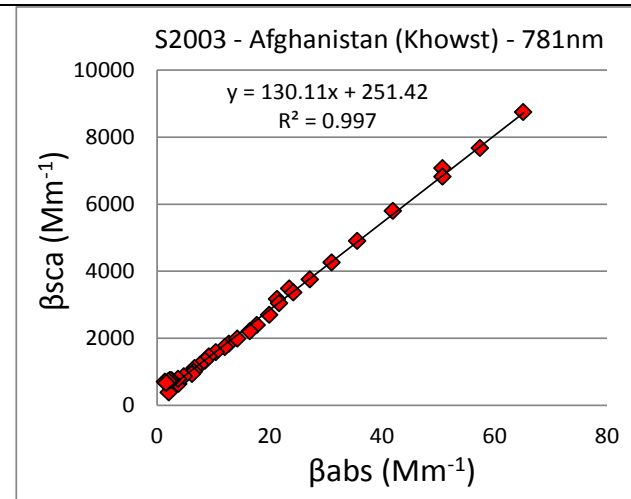

**SSA (781nm) = 0.992**

Optical scattering, absorption and single scattering albedos (SSA) at three wavelengths, where  $SSA = 1/(1 + 1/m)$  and  $m$  is the slope of the above plots.

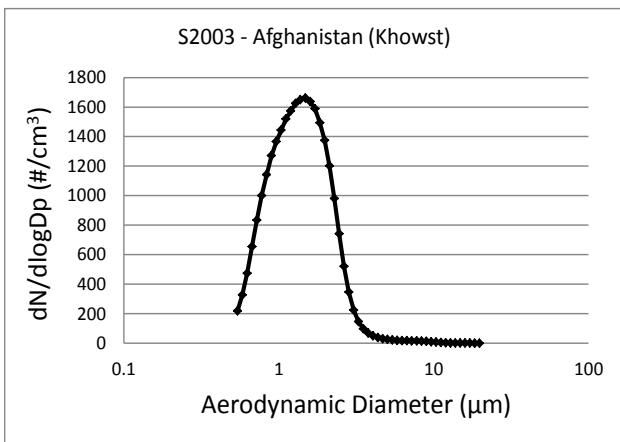

| Median<br>( $\mu\text{m}$ ) | Mean<br>( $\mu\text{m}$ ) | Geo. Mean<br>( $\mu\text{m}$ ) | Mode<br>( $\mu\text{m}$ ) | Geo. Std. Dev.<br>( $\mu\text{m}$ ) |
|-----------------------------|---------------------------|--------------------------------|---------------------------|-------------------------------------|
| 1.334                       | 1.457                     | 1.328                          | 1.448                     | 1.523                               |

| <b>Teflon Filters</b>               |       |        |       |       |
|-------------------------------------|-------|--------|-------|-------|
|                                     | PM10  | PM10   | PM2.5 | PM2.5 |
| Mass ( $\mu\text{g}$ )              | 9880  | na     | na    | na    |
| PM <sub>2.5</sub> /PM <sub>10</sub> |       |        |       |       |
| Average                             |       |        |       |       |
| <b>Betagaugue</b>                   |       |        |       |       |
|                                     | PM2.5 | PM10   |       |       |
| Mass ( $\mu\text{g}/\text{m}^3$ )   | 522.3 | 1975.1 |       |       |
| PM <sub>2.5</sub> /PM <sub>10</sub> | 0.26  |        |       |       |

Particle size distribution for PM<sub>2.5</sub>, as well as Teflon filter and betagaugue mass measurements, together with PM<sub>2.5</sub>/PM<sub>10</sub> ratios.



**Sample S2004, Qatar (Al Udeid)**

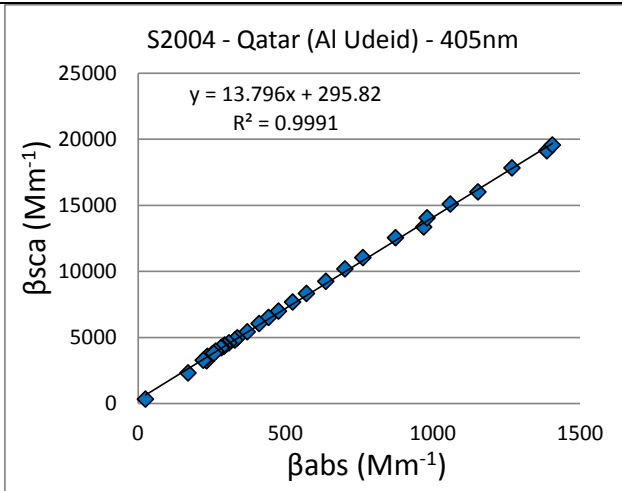

**SSA (405nm) = 0.932**

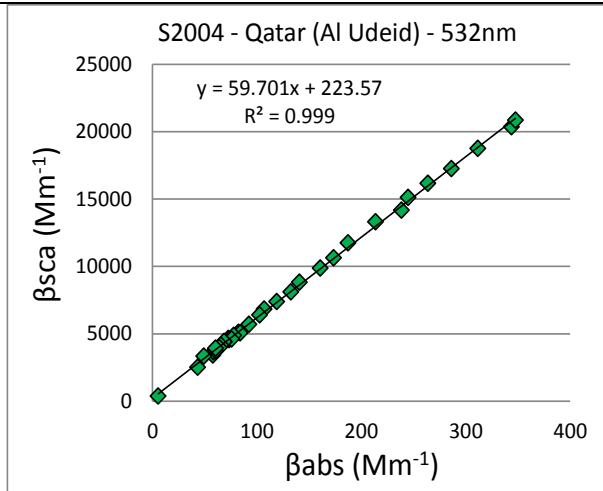

**SSA (532nm) = 0.984**

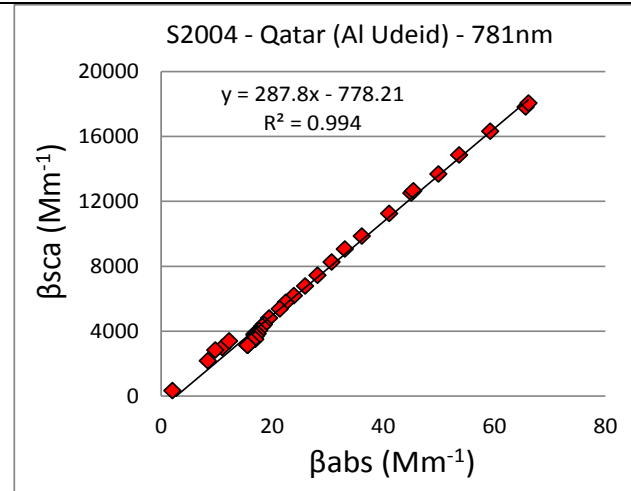

**SSA (781nm) = 0.997**

Optical scattering, absorption and single scattering albedos (SSA) at three wavelengths, where  $SSA = 1/(1 + 1/m)$  and  $m$  is the slope of the above plots.

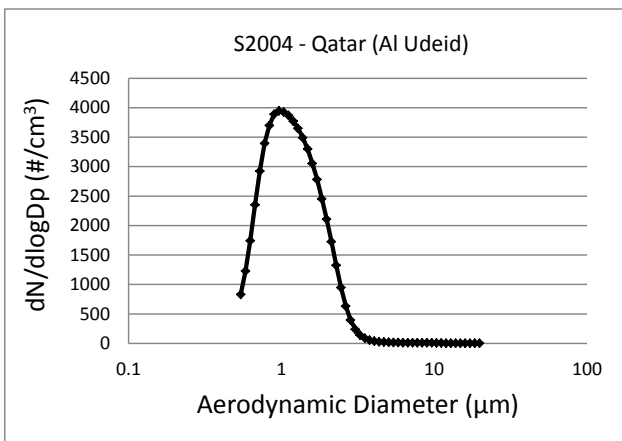

| Median      | Mean        | Geo. Mean   | Mode        | Geo. Std. Dev. |
|-------------|-------------|-------------|-------------|----------------|
| ( $\mu m$ )    |
| 1.132       | 1.261       | 1.159       | 0.972       | 1.491          |

| <u>Teflon Filters</u>               |       |        |       |       |
|-------------------------------------|-------|--------|-------|-------|
|                                     | PM10  | PM10   | PM2.5 | PM2.5 |
| Mass ( $\mu g$ )                    | 14330 | 12660  | 3200  | 3230  |
| PM <sub>2.5</sub> /PM <sub>10</sub> | 0.22  | 0.23   | 0.25  | 0.26  |
| Average                             | 0.24  |        |       |       |
| <u>Betagaugue</u>                   |       |        |       |       |
|                                     | PM2.5 | PM10   |       |       |
| Mass ( $\mu g/m^3$ )                | 380   | 1763.8 |       |       |
| PM <sub>2.5</sub> /PM <sub>10</sub> | 0.22  |        |       |       |

Particle size distribution for PM<sub>2.5</sub>, as well as Teflon filter and betagaugue mass measurements, together with PM<sub>2.5</sub>/PM<sub>10</sub> ratios.

**Sample S2005, United Arab Emirates (Al Dhafra)**

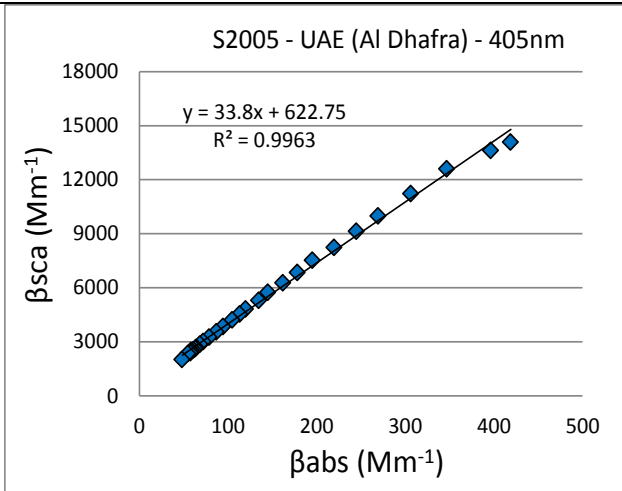

**SSA (405nm) = 0.971**

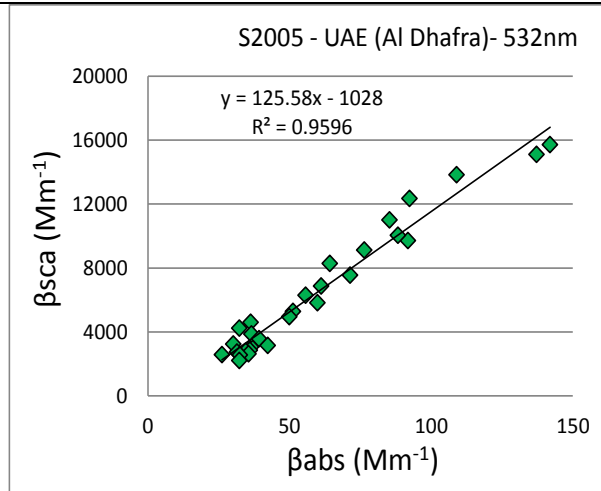

**SSA (532nm) = 0.992**

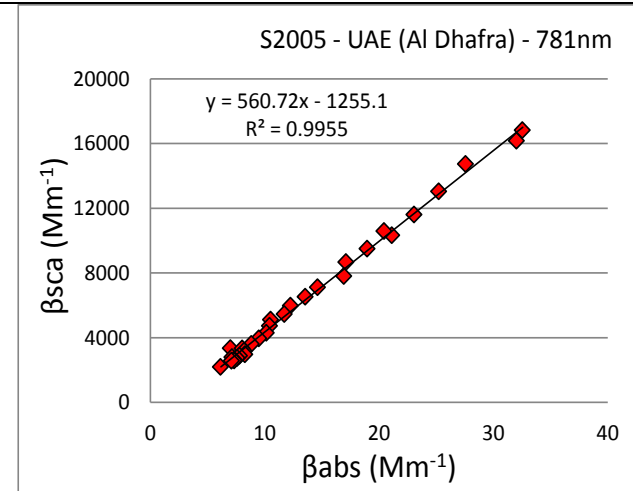

**SSA (781nm) = 0.998**

Optical scattering, absorption and single scattering albedos (SSA) at three wavelengths, where  $SSA = 1/(1 + 1/m)$  and  $m$  is the slope of the above plots.

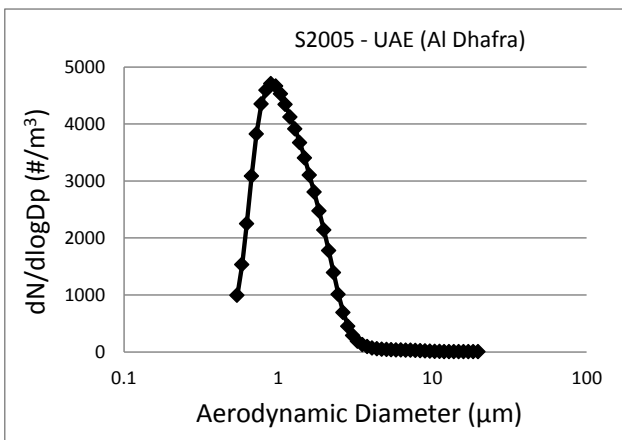

| Median            | Mean              | Geo. Mean         | Mode              | Geo. Std. Dev.    |
|-------------------|-------------------|-------------------|-------------------|-------------------|
| ( $\mu\text{m}$ ) |
| 1.087             | 1.243             | 1.134             | 0.898             | 1.509             |

| <b>Teflon Filters</b>               |       |        |       |
|-------------------------------------|-------|--------|-------|
|                                     | PM10  | PM10   | PM2.5 |
| Mass ( $\mu\text{g}$ )              | 11580 | 10280  | 2270  |
| PM <sub>2.5</sub> /PM <sub>10</sub> | 0.20  | 0.19   | 0.22  |
| Average                             | 0.21  |        |       |
| <b>Betagaugue</b>                   |       |        |       |
|                                     | PM2.5 | PM10   |       |
| Mass ( $\mu\text{g}/\text{m}^3$ )   | 207.7 | 1121.6 |       |
| PM <sub>2.5</sub> /PM <sub>10</sub> | 0.19  |        |       |

Particle size distribution for PM<sub>2.5</sub>, as well as Teflon filter and betagaugue mass measurements, together with PM<sub>2.5</sub>/PM<sub>10</sub> ratios.

**Sample S2006, Iraq (Balad)**

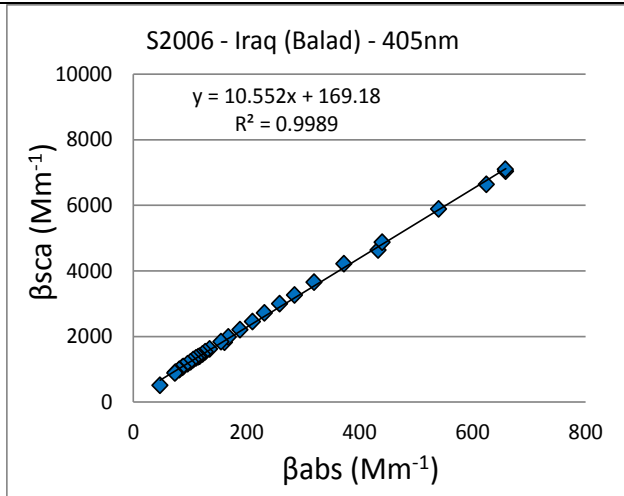

**SSA (405nm) = 0.913**

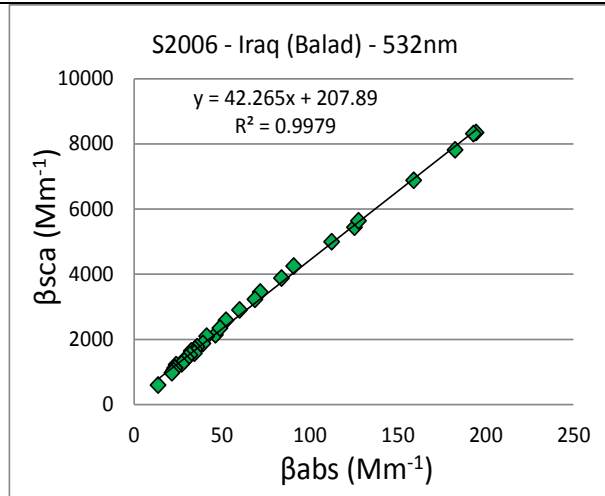

**SSA (532nm) = 0.977**

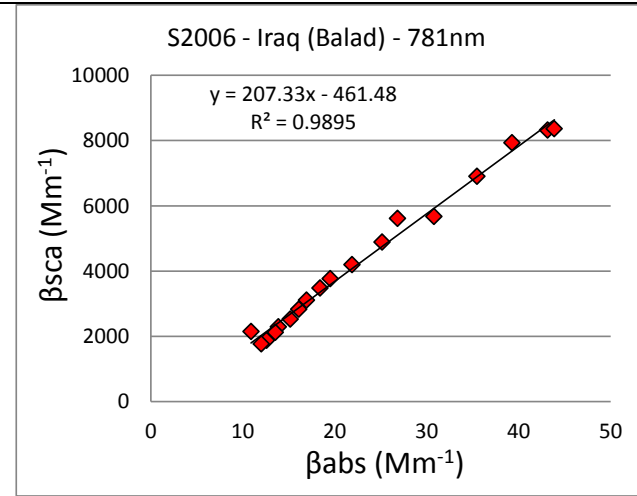

**SSA (781nm) = 0.995**

Optical scattering, absorption and single scattering albedos (SSA) at three wavelengths, where  $SSA = 1/(1 + 1/m)$  and  $m$  is the slope of the above plots.

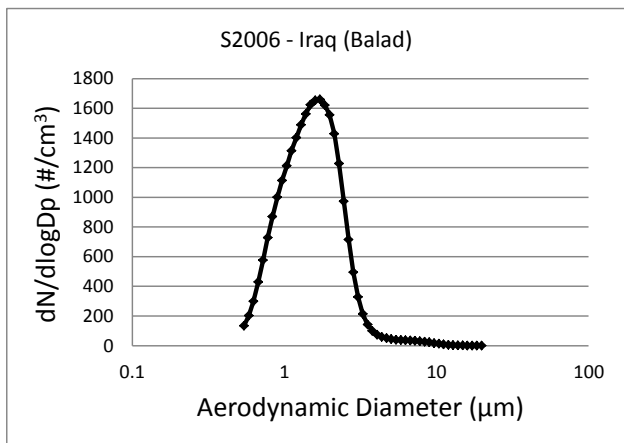

| Median<br>( $\mu m$ ) | Mean<br>( $\mu m$ ) | Geo. Mean<br>( $\mu m$ ) | Mode<br>( $\mu m$ ) | Geo. Std. Dev.<br>( $\mu m$ ) |
|-----------------------|---------------------|--------------------------|---------------------|-------------------------------|
| 1.475                 | 1.610               | 1.458                    | 1.645               | 1.541                         |

| <b>Teflon Filters</b>               |       |      |        |       |
|-------------------------------------|-------|------|--------|-------|
|                                     | PM10  | PM10 | PM2.5  | PM2.5 |
| Mass ( $\mu g$ )                    | 8370  | 7410 | 1430   | 1490  |
| PM <sub>2.5</sub> /PM <sub>10</sub> | 0.17  | 0.18 | 0.19   | 0.20  |
| Average                             | 0.19  |      |        |       |
| <b>Betagaugue</b>                   |       |      |        |       |
|                                     | PM2.5 |      | PM10   |       |
| Mass ( $\mu g/m^3$ )                | 586.9 |      | 3836.4 |       |
| PM <sub>2.5</sub> /PM <sub>10</sub> | 0.15  |      |        |       |

Particle size distribution for PM<sub>2.5</sub>, as well as Teflon filter and betagaugue mass measurements, together with PM<sub>2.5</sub>/PM<sub>10</sub> ratios.

**Sample S2007, Iraq (Baghdad, Camp Victory)**

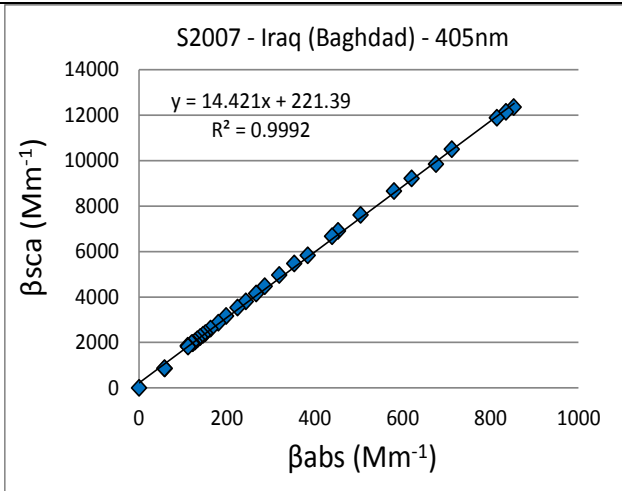

**SSA (405nm) = 0.935**

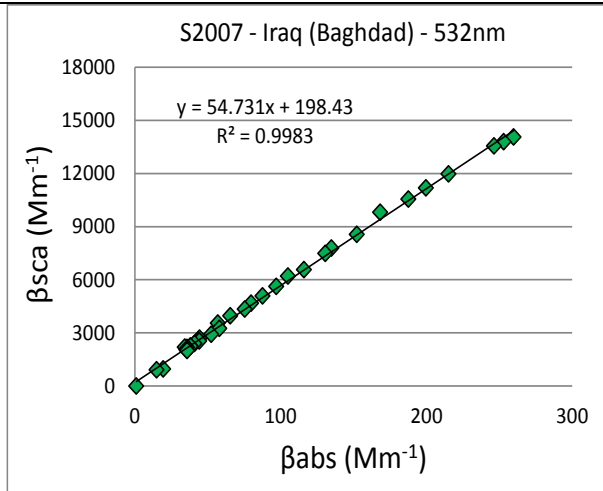

**SSA (532nm) = 0.982**

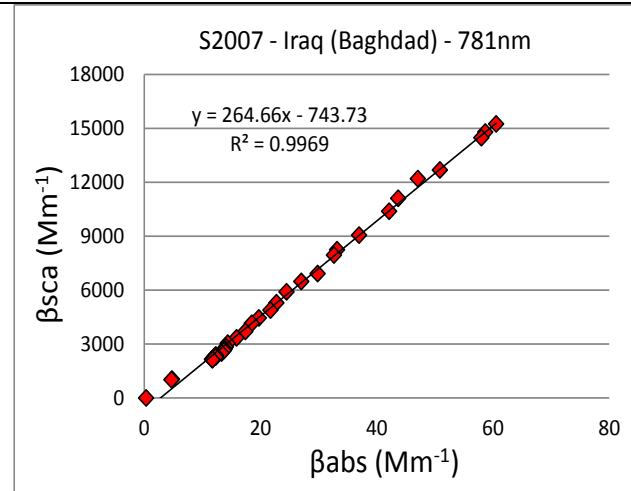

**SSA (781nm) = 0.996**

Optical scattering, absorption and single scattering albedos (SSA) at three wavelengths, where  $SSA = 1/(1 + 1/m)$  and  $m$  is the slope of the above plots.

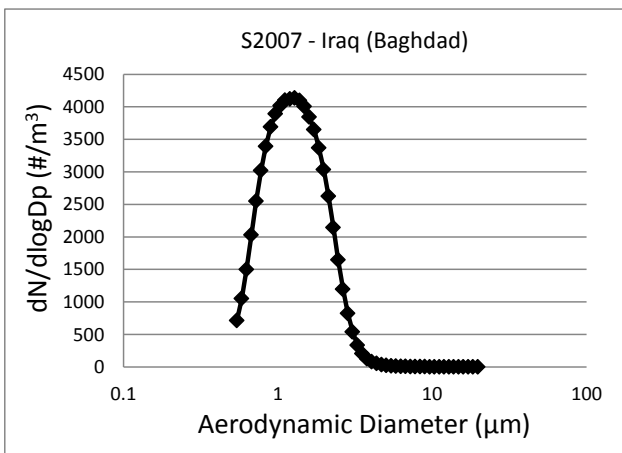

| Median            | Mean              | Geo. Mean         | Mode              | Geo. Std. Dev.    |
|-------------------|-------------------|-------------------|-------------------|-------------------|
| ( $\mu\text{m}$ ) |
| 1.262             | 1.394             | 1.273             | 1.288             | 1.523             |

| <b>Teflon Filters</b>               |       |       |       |       |
|-------------------------------------|-------|-------|-------|-------|
|                                     | PM10  | PM10  | PM2.5 | PM2.5 |
| Mass ( $\mu\text{g}$ )              | 10310 | 9330  | 3030  | 3030  |
| PM <sub>2.5</sub> /PM <sub>10</sub> | 0.29  | 0.29  | 0.32  | 0.32  |
| Average                             | 0.31  |       |       |       |
| <b>Betagaugue</b>                   |       |       |       |       |
|                                     | PM2.5 | PM10  |       |       |
| Mass ( $\mu\text{g}/\text{m}^3$ )   | 183.5 | 647.3 |       |       |
| PM <sub>2.5</sub> /PM <sub>10</sub> | 0.28  |       |       |       |

Particle size distribution for PM<sub>2.5</sub>, as well as Teflon filter and betagaugue mass measurements, together with PM<sub>2.5</sub>/PM<sub>10</sub> ratios.

**Sample S2008, Iraq (Tallil, Camp Adder)**

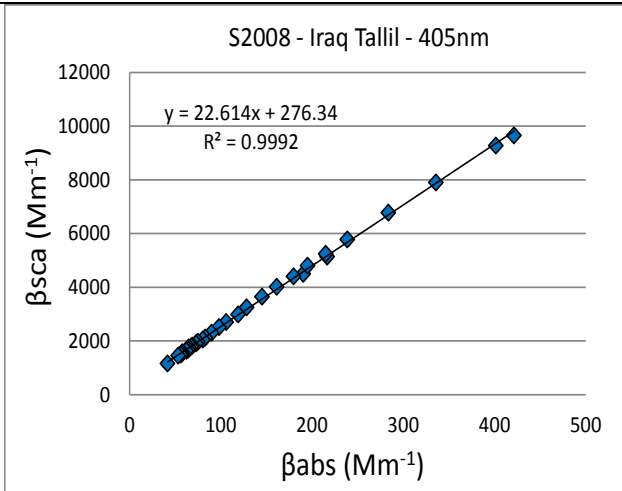

**SSA (405nm) = 0.958**

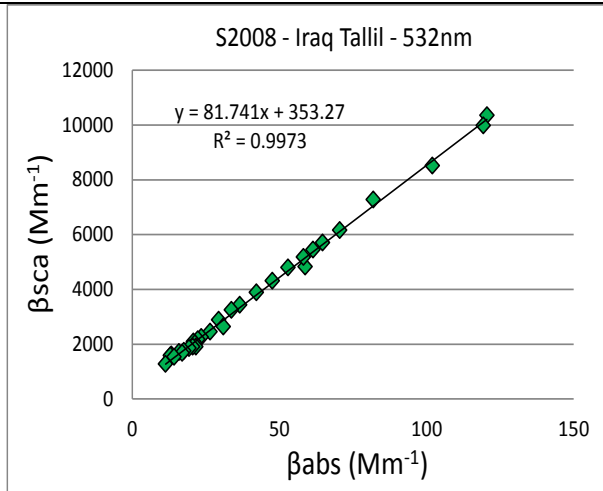

**SSA (532nm) = 0.988**

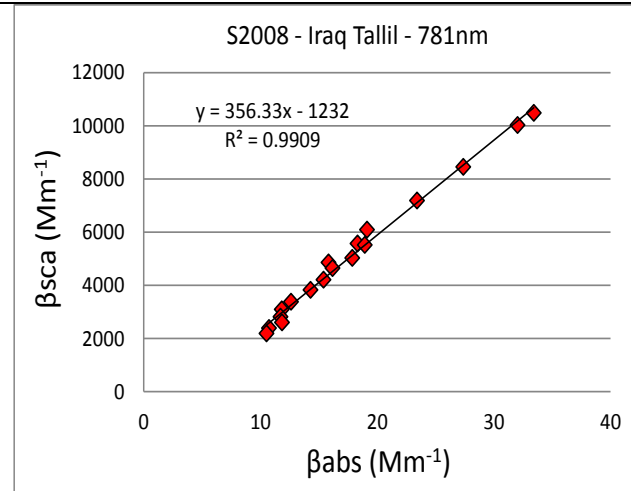

**SSA (781nm) = 0.997**

Optical scattering, absorption and single scattering albedos (SSA) at three wavelengths, where  $SSA = 1/(1 + 1/m)$  and  $m$  is the slope of the above plots.

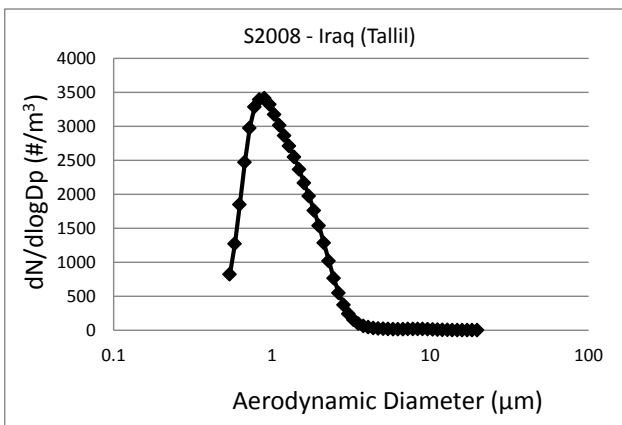

| Median            | Mean              | Geo. Mean         | Mode              | Geo. Std. Dev.    |
|-------------------|-------------------|-------------------|-------------------|-------------------|
| ( $\mu\text{m}$ ) |
| 1.066             | 1.230             | 1.118             | 0.889             | 1.519             |

| <b>Teflon Filters</b>               |       |      |        |       |
|-------------------------------------|-------|------|--------|-------|
|                                     | PM10  | PM10 | PM2.5  | PM2.5 |
| Mass ( $\mu\text{g}$ )              | 5290  | 4650 | 1170   | 1150  |
| PM <sub>2.5</sub> /PM <sub>10</sub> | 0.22  | 0.22 | 0.25   | 0.25  |
| Average                             | 0.23  |      |        |       |
| <b>Betagaugue</b>                   |       |      |        |       |
|                                     | PM2.5 |      | PM10   |       |
| Mass ( $\mu\text{g}/\text{m}^3$ )   | 383.6 |      | 2152.1 |       |
| PM <sub>2.5</sub> /PM <sub>10</sub> | 0.18  |      |        |       |

Particle size distribution for PM<sub>2.5</sub>, as well as Teflon filter and betagaugue mass measurements, together with PM<sub>2.5</sub>/PM<sub>10</sub> ratios.

**Sample S2009, Iraq (Tikrit, Speicher)**

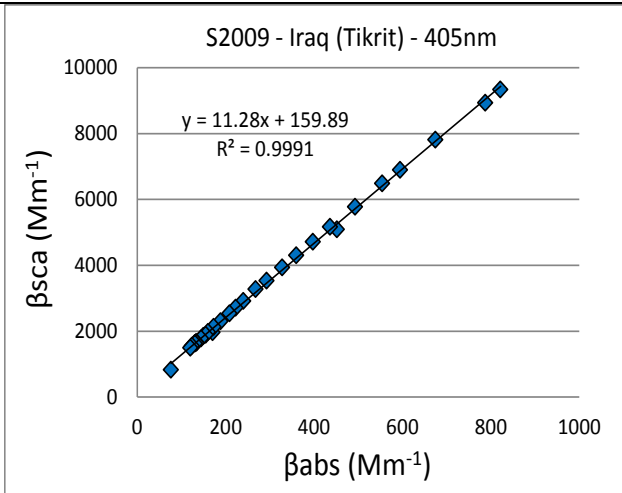

**SSA (405nm) = 0.919**

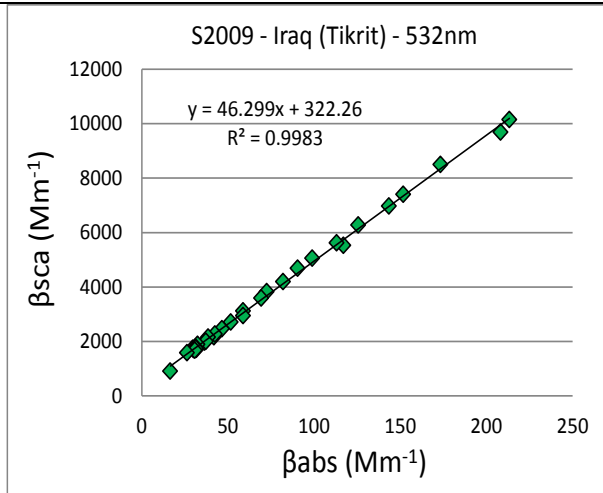

**SSA (532nm) = 0.979**

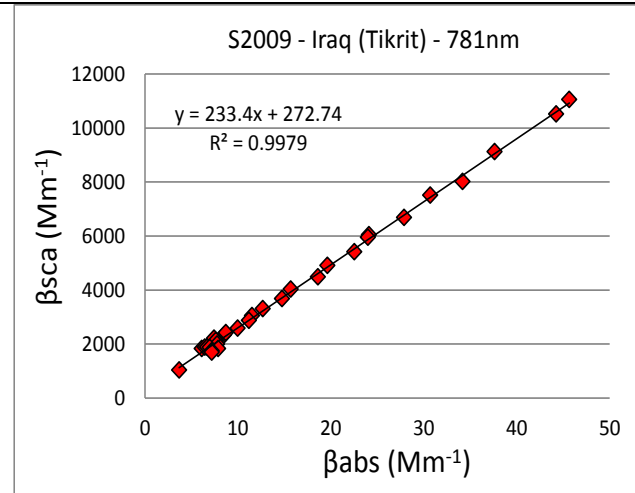

**SSA (781nm) = 0.996**

Optical scattering, absorption and single scattering albedos (SSA) at three wavelengths, where  $SSA = 1/(1 + 1/m)$  and  $m$  is the slope of the above plots.

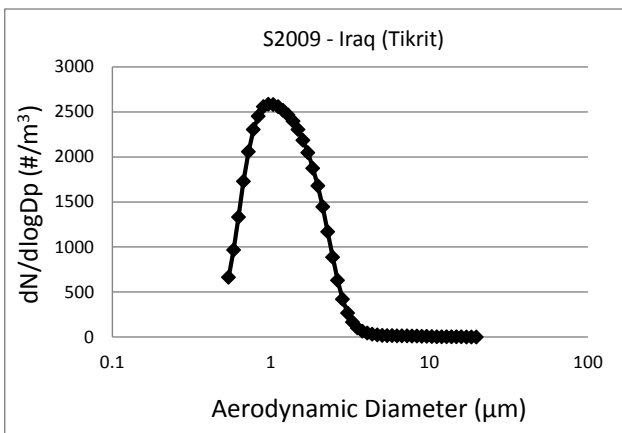

| Median | Mean  | Geo. Mean | Mode  | Geo. Std. Dev. |
|--------|-------|-----------|-------|----------------|
| (μm)   | (μm)  | (μm)      | (μm)  | (μm)           |
| 1.168  | 1.313 | 1.195     | 1.007 | 1.530          |

| <b>Teflon Filters</b>               |       |      |       |       |
|-------------------------------------|-------|------|-------|-------|
|                                     | PM10  | PM10 | PM2.5 | PM2.5 |
| Mass (μg)                           | 9190  | 8200 | 2170  | 2140  |
| PM <sub>2.5</sub> /PM <sub>10</sub> | 0.24  | 0.23 | 0.26  | 0.26  |
| Average                             | 0.25  |      |       |       |
| <b>Betagaugue</b>                   |       |      |       |       |
|                                     | PM2.5 |      | PM10  |       |
| Mass (μg/m <sup>3</sup> )           | 174.9 |      | 771.2 |       |
| PM <sub>2.5</sub> /PM <sub>10</sub> | 0.23  |      |       |       |

Particle size distribution for PM<sub>2.5</sub>, as well as Teflon filter and betagaugue mass measurements, together with PM<sub>2.5</sub>/PM<sub>10</sub> ratios.

**Sample S2010, Iraq (Taji)**

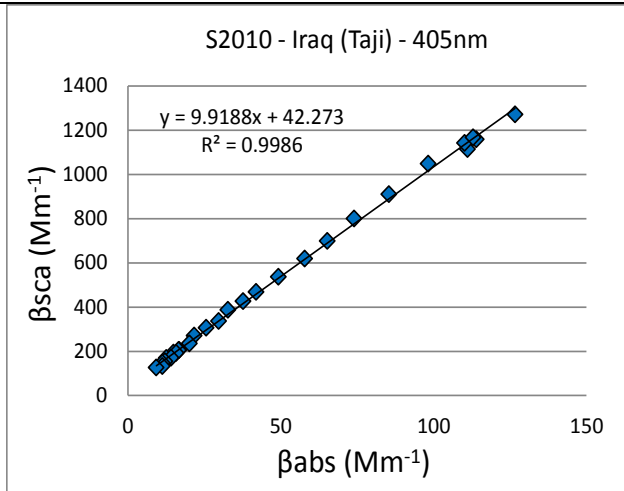

**SSA (405nm) = 0.908**

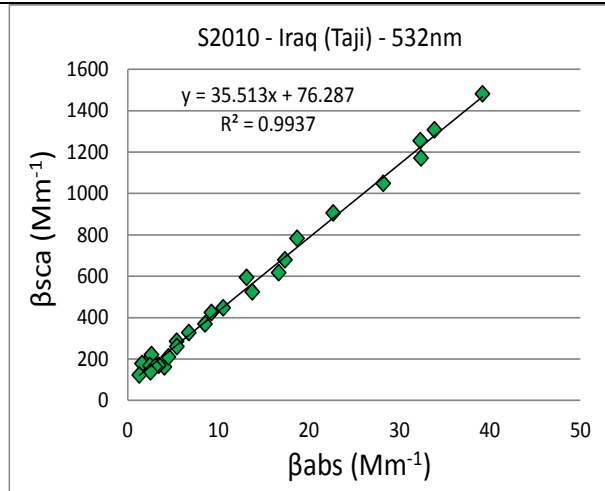

**SSA (532nm) = 0.973**

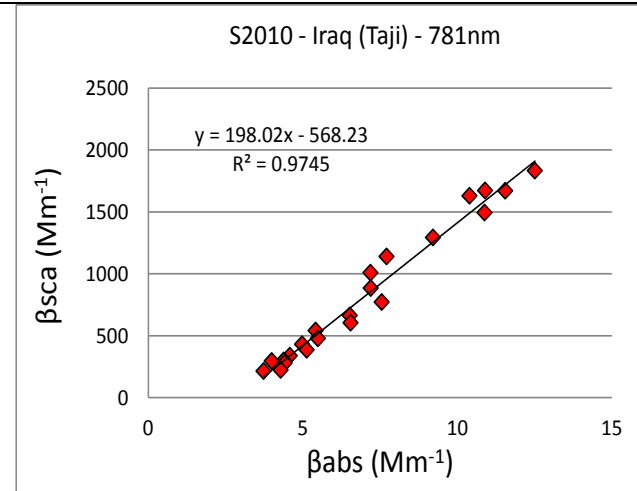

**SSA (781nm) = 0.995**

Optical scattering, absorption and single scattering albedos (SSA) at three wavelengths, where  $SSA = 1/(1 + 1/m)$  and  $m$  is the slope of the above plots.

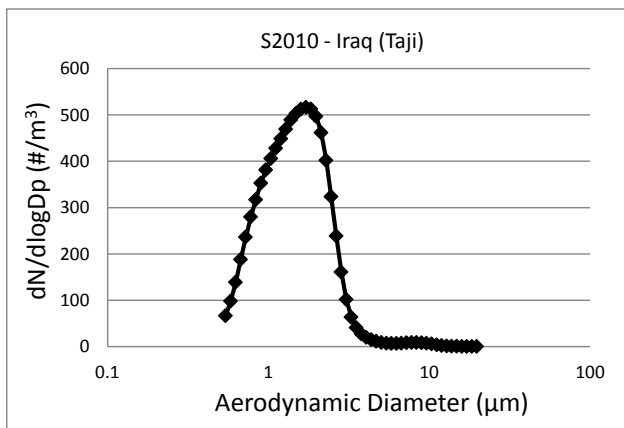

| Median<br>( $\mu\text{m}$ ) | Mean<br>( $\mu\text{m}$ ) | Geo. Mean<br>( $\mu\text{m}$ ) | Mode<br>( $\mu\text{m}$ ) | Geo. Std. Dev.<br>( $\mu\text{m}$ ) |
|-----------------------------|---------------------------|--------------------------------|---------------------------|-------------------------------------|
| 1.437                       | 1.568                     | 1.415                          | 1.665                     | 1.557                               |

| <b>Teflon Filters</b>               |       |      |        |       |
|-------------------------------------|-------|------|--------|-------|
|                                     | PM10  | PM10 | PM2.5  | PM2.5 |
| Mass ( $\mu\text{g}$ )              | 4520  | 4010 | 580    | 550   |
| PM <sub>2.5</sub> /PM <sub>10</sub> | 0.13  | 0.12 | 0.14   | 0.14  |
| Average                             | 0.13  |      |        |       |
| <b>Betagaugue</b>                   |       |      |        |       |
|                                     | PM2.5 |      | PM10   |       |
| Mass ( $\mu\text{g}/\text{m}^3$ )   | 811.1 |      | 6116.4 |       |
| PM <sub>2.5</sub> /PM <sub>10</sub> | 0.13  |      |        |       |

Particle size distribution for PM<sub>2.5</sub>, as well as Teflon filter and betagaugue mass measurements, together with PM<sub>2.5</sub>/PM<sub>10</sub> ratios.

**Sample S2011, Iraq (Al Asad)**

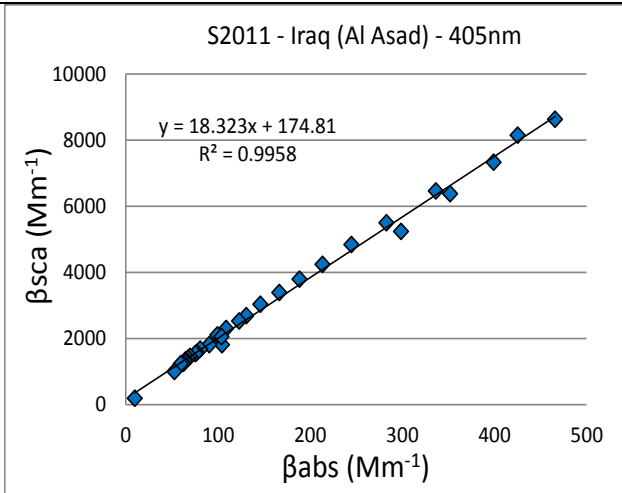

**SSA (405nm) = 0.948**

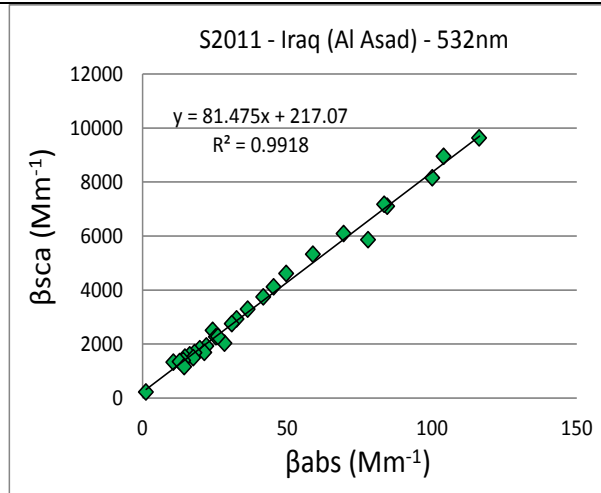

**SSA (532nm) = 0.988**

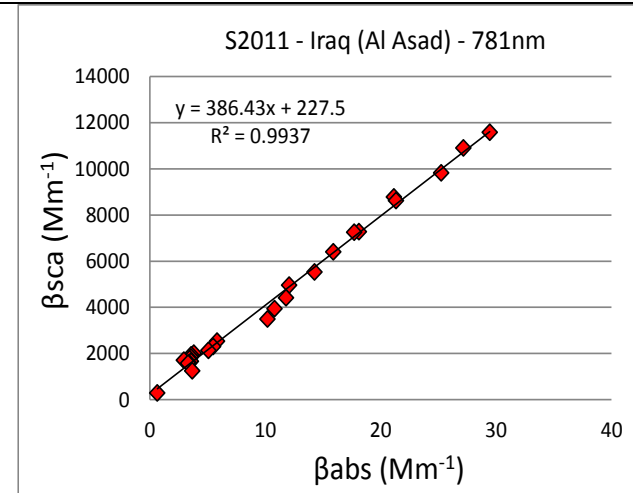

**SSA (781nm) = 0.997**

Optical scattering, absorption and single scattering albedos (SSA) at three wavelengths, where  $SSA = 1/(1 + 1/m)$  and  $m$  is the slope of the above plots.

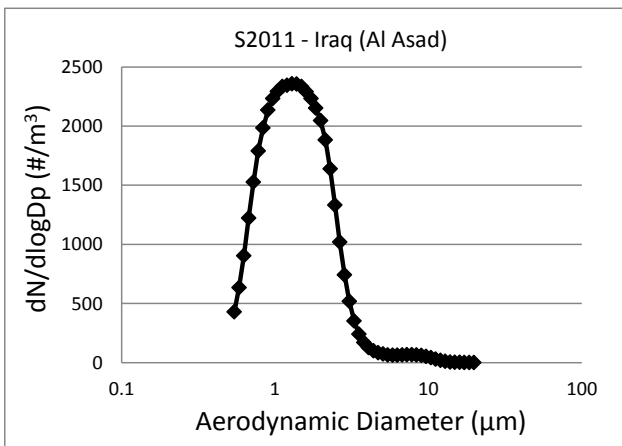

| Median ( $\mu m$ ) | Mean ( $\mu m$ ) | Geo. Mean ( $\mu m$ ) | Mode ( $\mu m$ ) | Geo. Std. Dev. ( $\mu m$ ) |
|--------------------|------------------|-----------------------|------------------|----------------------------|
| 1.326              | 1.534            | 1.351                 | 1.303            | 1.607                      |

| <b>Teflon Filters</b>               |       |       |        |       |
|-------------------------------------|-------|-------|--------|-------|
|                                     | PM10  | PM10  | PM2.5  | PM2.5 |
| Mass ( $\mu g$ )                    | 14190 | 12610 | 1750   | 1750  |
| PM <sub>2.5</sub> /PM <sub>10</sub> | 0.12  | 0.12  | 0.14   | 0.14  |
| Average                             | 0.13  |       |        |       |
| <b>Betagaugue</b>                   |       |       |        |       |
|                                     | PM2.5 |       | PM10   |       |
| Mass ( $\mu g/m^3$ )                | 439.1 |       | 3639.8 |       |
| PM <sub>2.5</sub> /PM <sub>10</sub> | 0.12  |       |        |       |

Particle size distribution for PM<sub>2.5</sub>, as well as Teflon filter and betagaugue mass measurements, together with PM<sub>2.5</sub>/PM<sub>10</sub> ratios.



**Sample S2012, Kuwait, (North, Camp Buehring)**

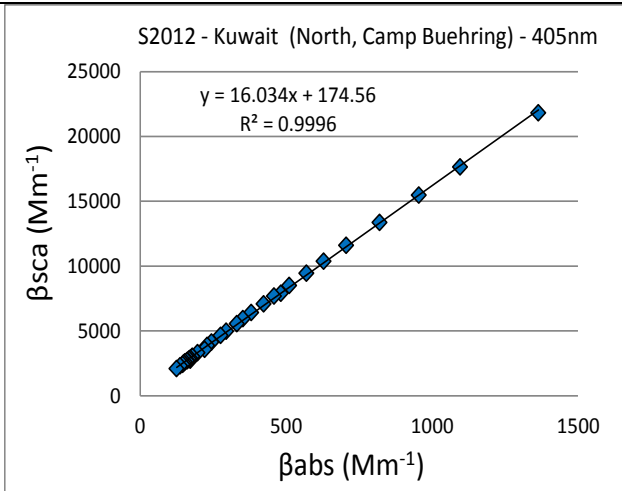

**SSA (405nm) = 0.941**

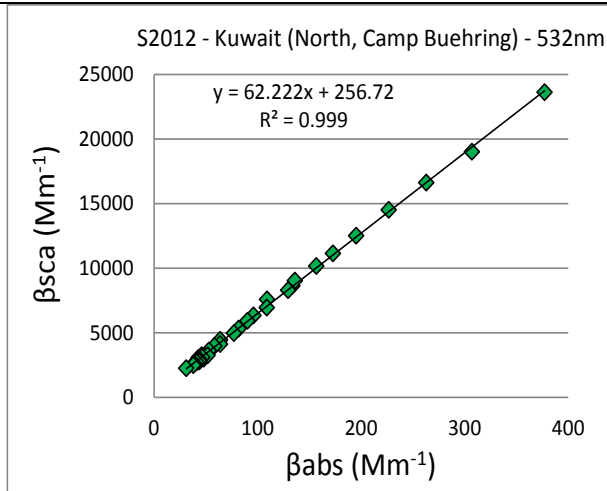

**SSA (532nm) = 0.984**

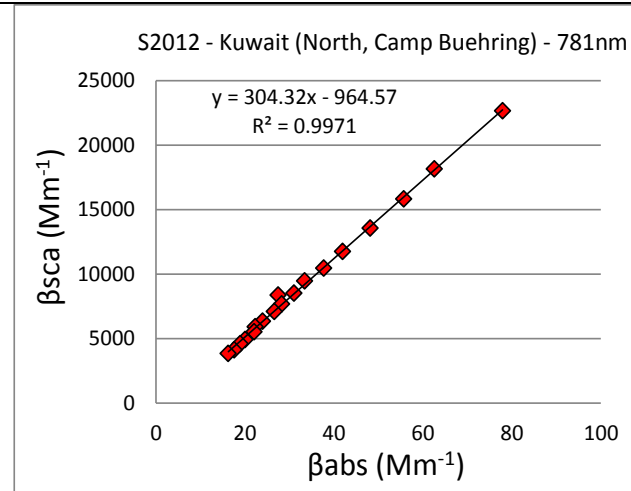

**SSA (781nm) = 0.997**

Optical scattering, absorption and single scattering albedos (SSA) at three wavelengths, where  $SSA = 1/(1 + 1/m)$  and  $m$  is the slope of the above plots.

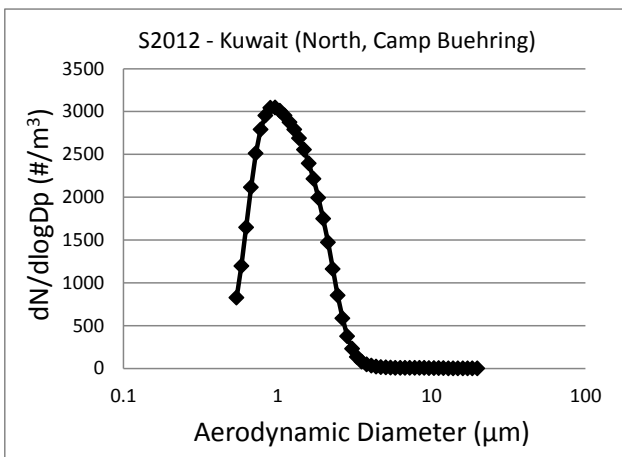

| Median            | Mean              | Geo. Mean         | Mode              | Geo. Std. Dev.    |
|-------------------|-------------------|-------------------|-------------------|-------------------|
| ( $\mu\text{m}$ ) |
| 1.121             | 1.258             | 1.151             | 0.936             | 1.510             |

| <b>Teflon Filters</b>               |       |        |       |
|-------------------------------------|-------|--------|-------|
|                                     | PM10  | PM10   | PM2.5 |
| Mass ( $\mu\text{g}$ )              | 7690  | 7190   | 2150  |
| PM <sub>2.5</sub> /PM <sub>10</sub> | 0.28  | 0.28   | 0.30  |
| Average                             | 0.29  |        |       |
|                                     |       |        |       |
|                                     |       |        |       |
| <b>Betagaugue</b>                   |       |        |       |
|                                     | PM2.5 | PM10   |       |
| Mass ( $\mu\text{g}/\text{m}^3$ )   | 369.9 | 1070.2 |       |
| PM <sub>2.5</sub> /PM <sub>10</sub> | 0.35  |        |       |

Particle size distribution for PM<sub>2.5</sub>, as well as Teflon filter and betagaugue mass measurements, together with PM<sub>2.5</sub>/PM<sub>10</sub> ratios.

**Sample S2013, Kuwait, (Central, Camp Ali Al Salem)**

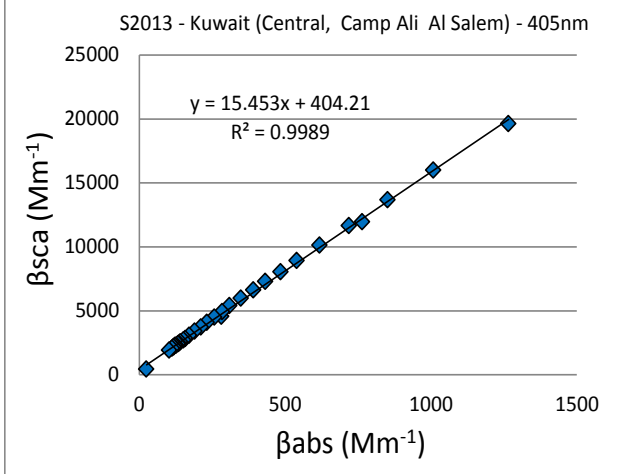

**SSA (405nm) = 0.939**

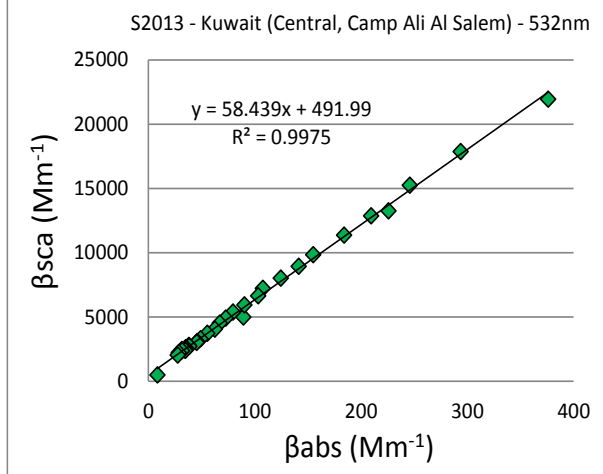

**SSA (532nm) = 0.983**

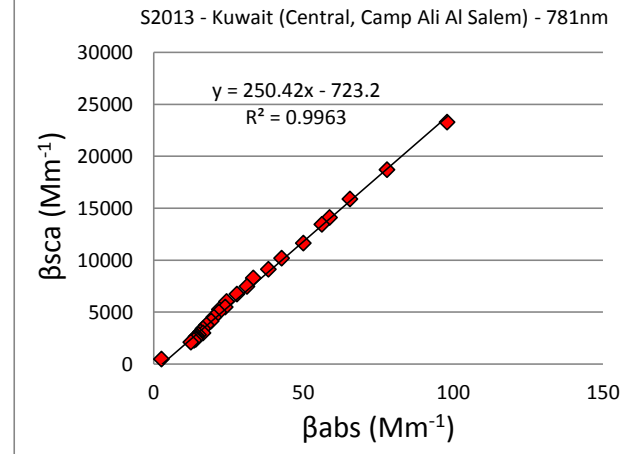

**SSA (781nm) = 0.996**

Optical scattering, absorption and single scattering albedos (SSA) at three wavelengths, where  $SSA = 1/(1 + 1/m)$  and  $m$  is the slope of the above plots.

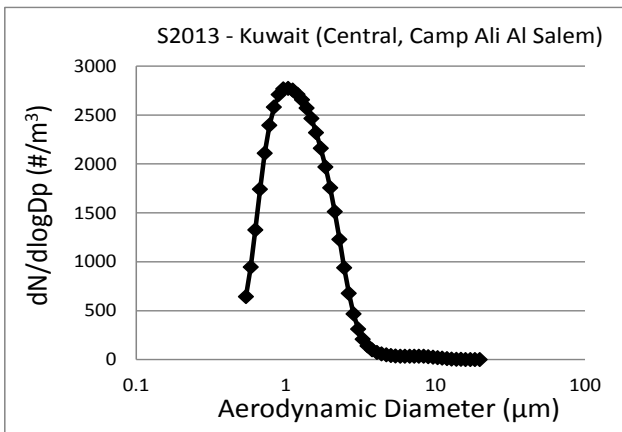

| Median<br>( $\mu\text{m}$ ) | Mean<br>( $\mu\text{m}$ ) | Geo. Mean<br>( $\mu\text{m}$ ) | Mode<br>( $\mu\text{m}$ ) | Geo. Std. Dev.<br>( $\mu\text{m}$ ) |
|-----------------------------|---------------------------|--------------------------------|---------------------------|-------------------------------------|
| 1.171                       | 1.336                     | 1.204                          | 1.009                     | 1.544                               |

| <b>Teflon Filters</b>               |       |       |       |       |
|-------------------------------------|-------|-------|-------|-------|
|                                     | PM10  | PM10  | PM2.5 | PM2.5 |
| Mass ( $\mu\text{g}$ )              | 13090 | 11930 | 2030  | 2070  |
| PM <sub>2.5</sub> /PM <sub>10</sub> | 0.16  | 0.16  | 0.17  | 0.17  |
| Average                             | 0.16  |       |       |       |
| <b>Betagaugue</b>                   |       |       |       |       |
|                                     | PM2.5 | PM10  |       |       |
| Mass ( $\mu\text{g}/\text{m}^3$ )   | 282.4 | 877.9 |       |       |
| PM <sub>2.5</sub> /PM <sub>10</sub> | 0.32  |       |       |       |

Particle size distribution for PM<sub>2.5</sub>, as well as Teflon filter and betagaugue mass measurements, together with PM<sub>2.5</sub>/PM<sub>10</sub> ratios.

**Sample S2014, Kuwait, (Coastal, Ash Shu Ayabah)**

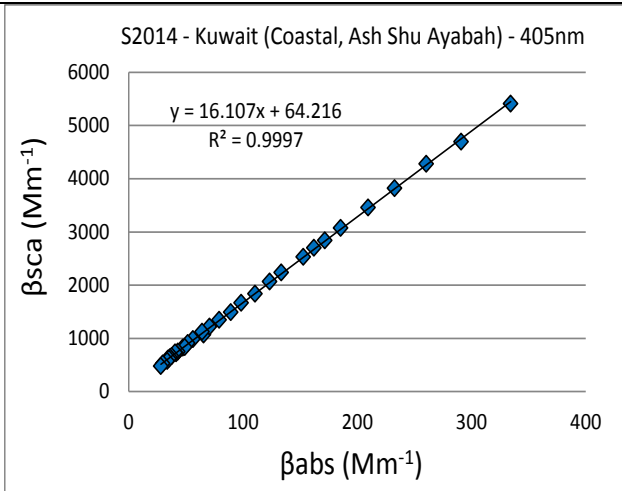

**SSA (405nm) = 0.942**

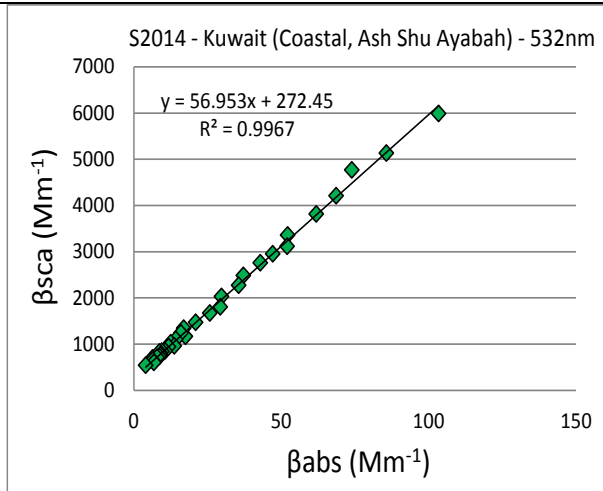

**SSA (532nm) = 0.983**

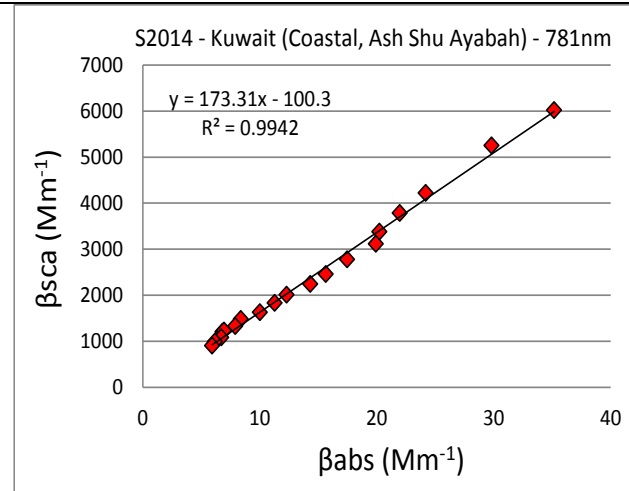

**SSA (781nm) = 0.994**

Optical scattering, absorption and single scattering albedos (SSA) at three wavelengths, where  $SSA = 1/(1 + 1/m)$  and  $m$  is the slope of the above plots.

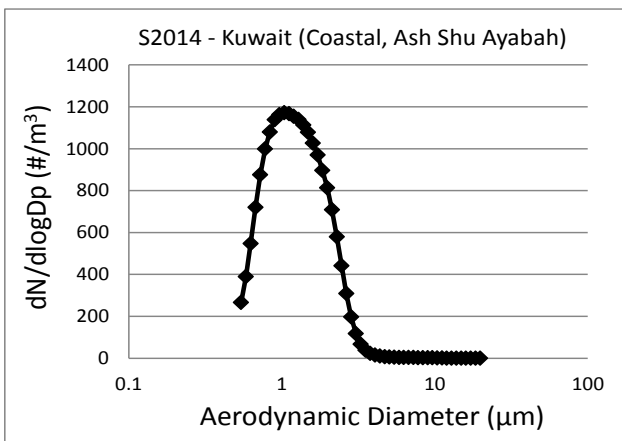

| Median | Mean  | Geo. Mean | Mode  | Geo. Std. Dev. |
|--------|-------|-----------|-------|----------------|
| (um)   | (um)  | (um)      | (um)  | (um)           |
| 1.188  | 1.324 | 1.209     | 1.037 | 1.522          |

| <b>Teflon Filters</b>               |       |      |        |       |
|-------------------------------------|-------|------|--------|-------|
|                                     | PM10  | PM10 | PM2.5  | PM2.5 |
| Mass (ug)                           | 5850  | 5440 | 1100   | 1130  |
| PM <sub>2.5</sub> /PM <sub>10</sub> | 0.19  | 0.19 | 0.20   | 0.21  |
| Average                             | 0.20  |      |        |       |
| <b>Betagaugue</b>                   |       |      |        |       |
|                                     | PM2.5 |      | PM10   |       |
| Mass (ug/m <sup>3</sup> )           | 651.5 |      | 2909.1 |       |
| PM <sub>2.5</sub> /PM <sub>10</sub> | 0.22  |      |        |       |

Particle size distribution for PM<sub>2.5</sub>, as well as Teflon filter and betagaugue mass measurements, together with PM<sub>2.5</sub>/PM<sub>10</sub> ratios.

**Sample S2015, Kuwait, (South, Camp Arifjan)**

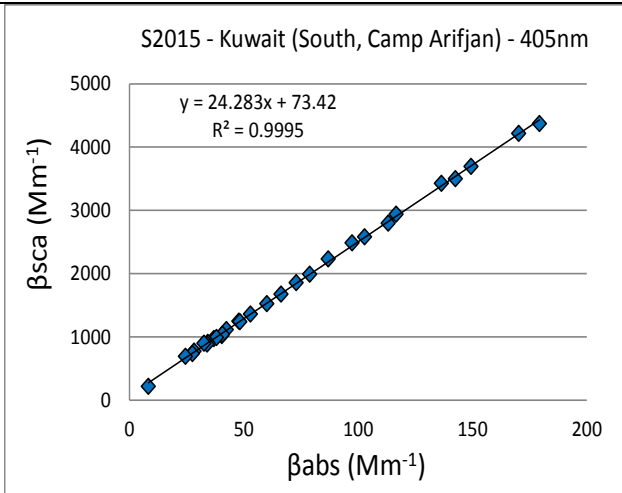

**SSA (405nm) = 0.960**

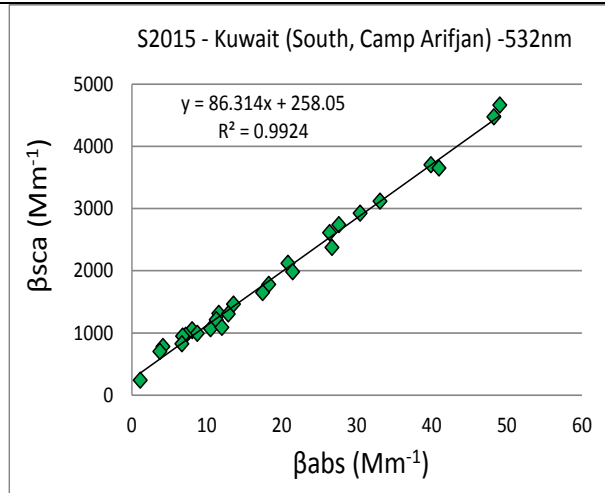

**SSA (532nm) = 0.989**

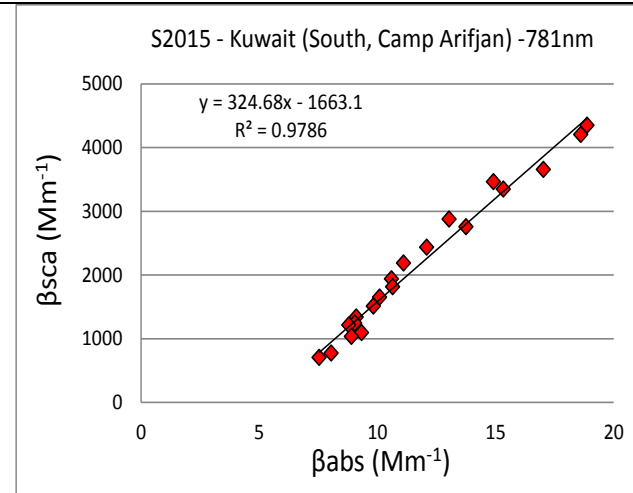

**SSA (781nm) = 0.997**

Optical scattering, absorption and single scattering albedos (SSA) at three wavelengths, where  $SSA = 1/(1 + 1/m)$  and  $m$  is the slope of the above plots.

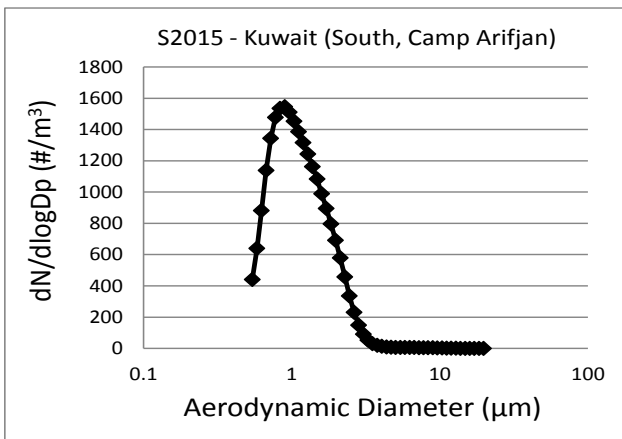

| Median | Mean  | Geo. Mean | Mode  | Geo. Std. Dev. |
|--------|-------|-----------|-------|----------------|
| (um)   | (um)  | (um)      | (um)  | (um)           |
| 1.062  | 1.212 | 1.108     | 0.886 | 1.509          |

| <b>Teflon Filters</b>               |        |      |        |       |
|-------------------------------------|--------|------|--------|-------|
|                                     | PM10   | PM10 | PM2.5  | PM2.5 |
| Mass (ug)                           | 5560   | 5040 | 880    | 850   |
| PM <sub>2.5</sub> /PM <sub>10</sub> | 0.16   | 0.15 | 0.17   | 0.17  |
| Average                             | 0.16   |      |        |       |
| <b>Betagaugue</b>                   |        |      |        |       |
|                                     | PM2.5  |      | PM10   |       |
| Mass (ug/m <sup>3</sup> )           | 1417.3 |      | 6737.4 |       |
| PM <sub>2.5</sub> /PM <sub>10</sub> | 0.21   |      |        |       |

Particle size distribution for PM<sub>2.5</sub>, as well as Teflon filter and betagaugue mass measurements, together with PM<sub>2.5</sub>/PM<sub>10</sub> ratios.

**Sample S2016, Afghanistan (Camp Leatherneck, Helmand Province)**

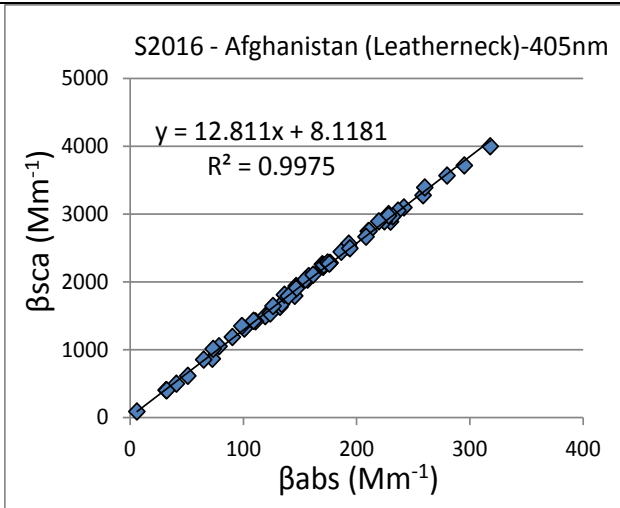

**SSA (405nm) = 0.928**

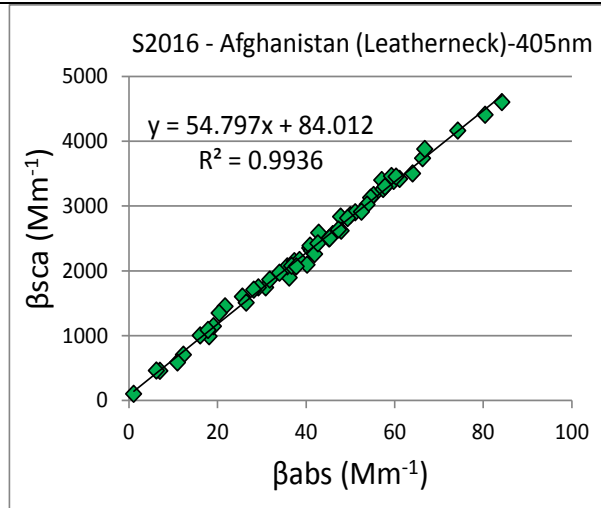

**SSA (532nm) = 0.982**

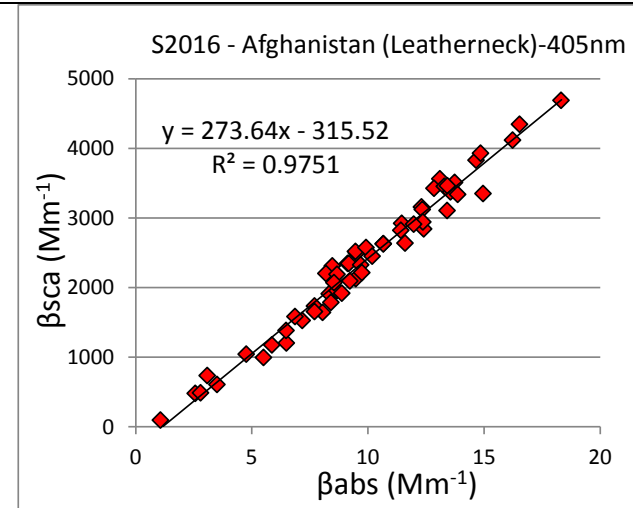

**SSA (781nm) = 0.996**

Optical scattering, absorption and single scattering albedos (SSA) at three wavelengths, where  $SSA = 1/(1 + 1/m)$  and  $m$  is the slope of the above plots.

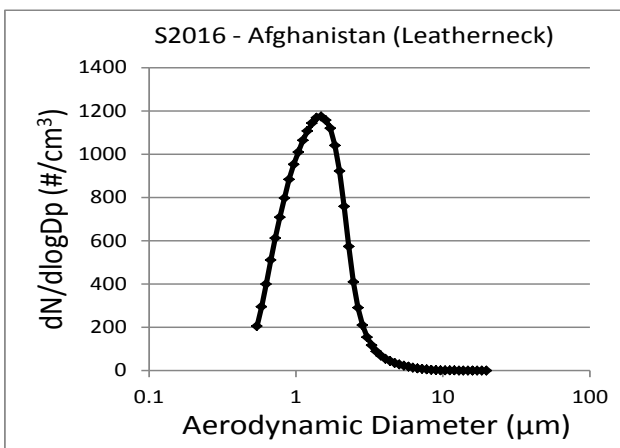

| Median<br>( $\mu\text{m}$ ) | Mean<br>( $\mu\text{m}$ ) | Geo. Mean<br>( $\mu\text{m}$ ) | Mode<br>( $\mu\text{m}$ ) | Geo. Std. Dev.<br>( $\mu\text{m}$ ) |
|-----------------------------|---------------------------|--------------------------------|---------------------------|-------------------------------------|
| 1.335                       | 1.473                     | 1.332                          | 1.478                     | 1.551                               |

|                                     | <u>Teflon Filters</u> |              |             |             |
|-------------------------------------|-----------------------|--------------|-------------|-------------|
|                                     | <u>PM2.5</u>          | <u>PM2.5</u> | <u>PM10</u> | <u>PM10</u> |
| Mass ( $\mu\text{g}$ )              | 1510                  | 1390         | 5170        | 5790        |
| PM <sub>2.5</sub> /PM <sub>10</sub> | 0.29                  | 0.26         | 0.26        | 0.24        |
| Average                             | 0.26                  |              |             |             |
|                                     |                       |              |             |             |
|                                     |                       |              |             |             |
|                                     | <u>Betagaugue</u>     |              |             |             |
|                                     | <u>PM2.5</u>          | <u>PM10</u>  |             |             |
| Mass ( $\mu\text{g}/\text{m}^3$ )   | 1481                  | 5762         |             |             |
| PM <sub>2.5</sub> /PM <sub>10</sub> | 0.26                  |              |             |             |

**SEM Measured Aspect Ratio**

| <u>Sample #</u> | <u>Number of Particles</u> | <u>Min</u> | <u>Max</u> | <u>Geom Mean</u> |
|-----------------|----------------------------|------------|------------|------------------|
| <b>S2016</b>    | 1338                       | 1.000      | 10.346     | 1.482            |

Particle size distribution for PM<sub>2.5</sub>, as well as Teflon filter and betagaugue mass measurements, together with PM<sub>2.5</sub>/PM<sub>10</sub> ratios.

**Sample S2017, Kuwait (Shuaiba Port)**

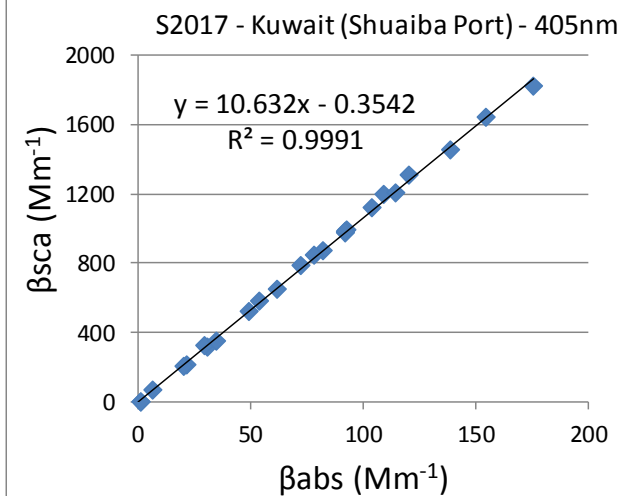

**SSA (405nm) = 0.914**

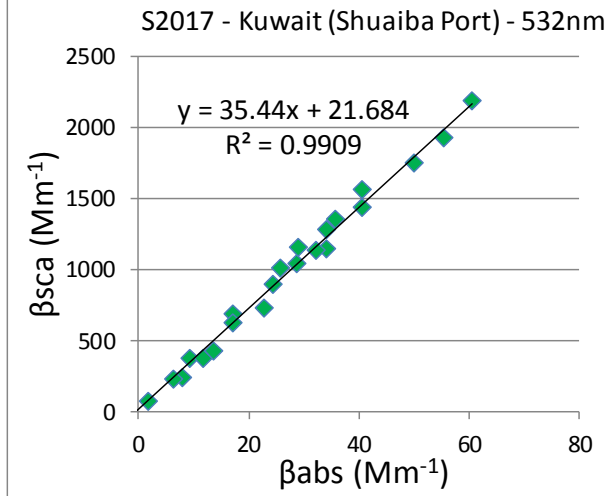

**SSA (532nm) = 0.973**

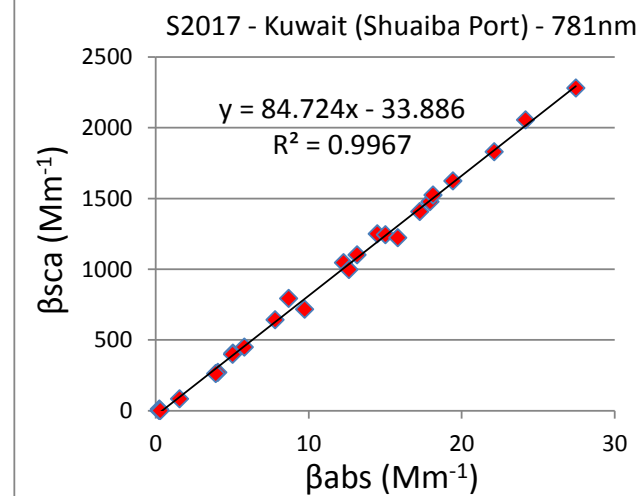

**SSA (781nm) = 0.988**

Optical scattering, absorption and single scattering albedos (SSA) at three wavelengths, where  $SSA = 1/(1 + 1/m)$  and  $m$  is the slope of the above plots.

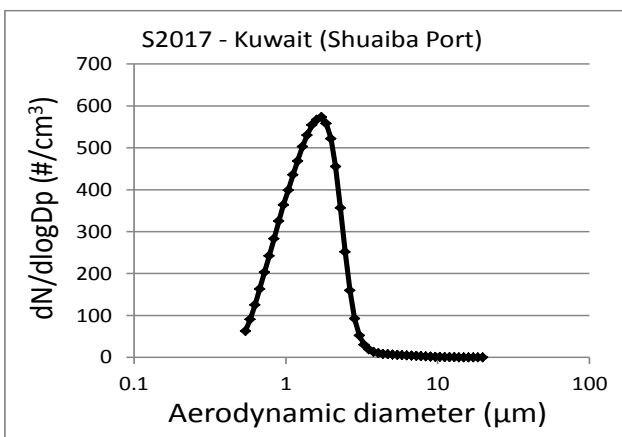

| Median            | Mean              | Geo. Mean         | Mode              | Geo. Std. Dev.    |
|-------------------|-------------------|-------------------|-------------------|-------------------|
| ( $\mu\text{m}$ ) |
| 1.468             | 1.540             | 1.420             | 1.736             | 1.498             |

|                                     | <u>Teflon Filters</u> |              |             |             |
|-------------------------------------|-----------------------|--------------|-------------|-------------|
|                                     | <u>PM2.5</u>          | <u>PM2.5</u> | <u>PM10</u> | <u>PM10</u> |
| Mass ( $\mu\text{g}$ )              | 1510                  | 1390         | 5170        | 5790        |
| PM <sub>2.5</sub> /PM <sub>10</sub> | 0.29                  | 0.26         | 0.26        | 0.24        |
| Average                             | 0.26                  |              |             |             |
|                                     | <u>Betagaugue</u>     |              |             |             |
|                                     | <u>PM2.5</u>          |              | <u>PM10</u> |             |
| Mass ( $\mu\text{g}/\text{m}^3$ )   | 1481                  |              | 5762        |             |
| PM <sub>2.5</sub> /PM <sub>10</sub> | 0.26                  |              |             |             |

**SEM Measured Aspect Ratio**

| <u>Sample #</u> | <u>Number of</u> | <u>Min</u> | <u>Max</u> | <u>Geom</u> |
|-----------------|------------------|------------|------------|-------------|
|                 | <u>Particles</u> |            |            | <u>Mean</u> |
| <b>S2017</b>    | 2345             | 1.000      | 5.934      | 1.434       |

Particle size distribution for PM<sub>2.5</sub>, as well as Teflon filter and betagaugue mass measurements, together with PM<sub>2.5</sub>/PM<sub>10</sub> ratios.

**Sample S3003, USA (Yuma Proving Grounds, Area 3835Z)**

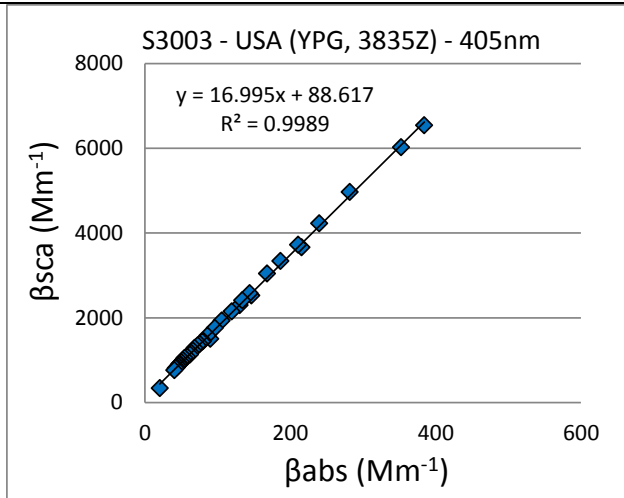

**SSA (405nm) = 0.944**

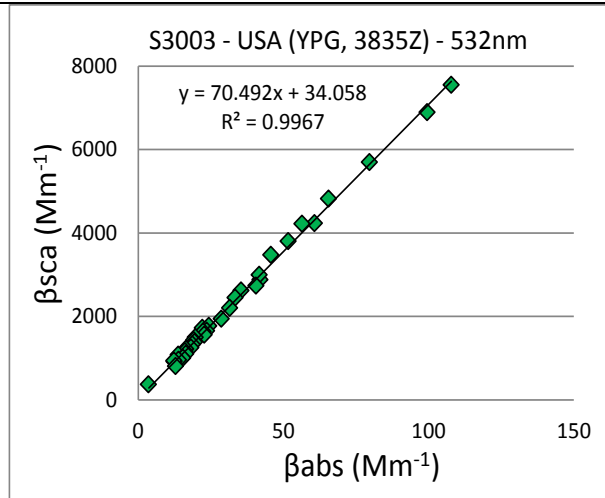

**SSA (532nm) = 0.986**

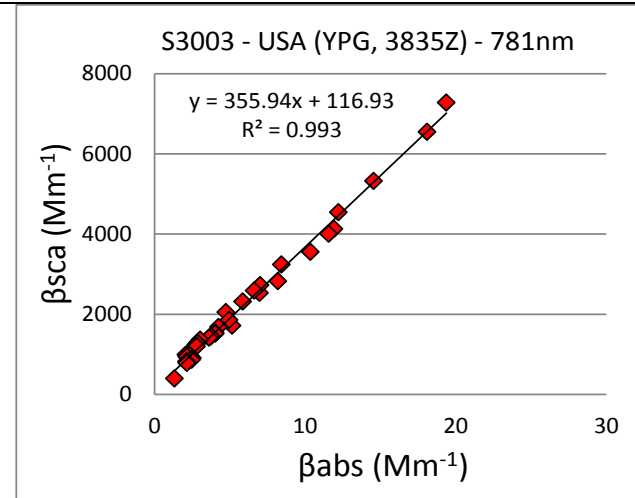

**SSA (781nm) = 0.997**

Optical scattering, absorption and single scattering albedos (SSA) at three wavelengths, where  $SSA = 1/(1 + 1/m)$  and  $m$  is the slope of the above plots.

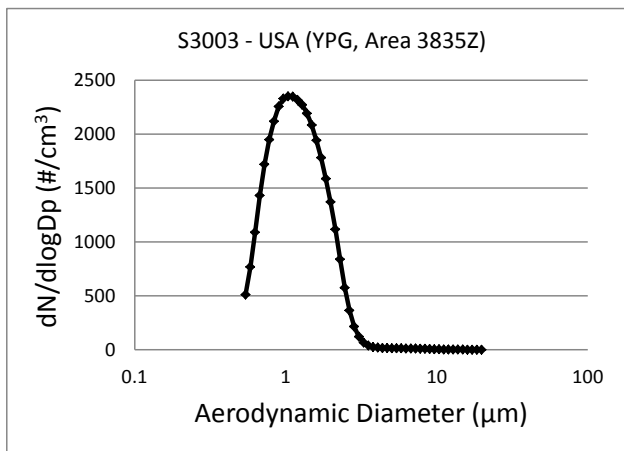

| Median            | Mean              | Geo. Mean         | Mode              | Geo. Std. Dev.    |
|-------------------|-------------------|-------------------|-------------------|-------------------|
| ( $\mu\text{m}$ ) |
| 1.157             | 1.278             | 1.175             | 1.065             | 1.494             |

|                                     | <u>Teflon Filters</u> |      |        |       |
|-------------------------------------|-----------------------|------|--------|-------|
|                                     | PM10                  | PM10 | PM2.5  | PM2.5 |
| Mass ( $\mu\text{g}$ )              | 6620                  | 5110 | 1080   | 1050  |
| PM <sub>2.5</sub> /PM <sub>10</sub> | 0.16                  | 0.21 | 0.16   | 0.21  |
| Average                             | 0.18                  |      |        |       |
|                                     | <u>Betagaugue</u>     |      |        |       |
|                                     | PM2.5                 |      | PM10   |       |
| Mass ( $\mu\text{g}/\text{m}^3$ )   | 618.4                 |      | 3299.5 |       |
| PM <sub>2.5</sub> /PM <sub>10</sub> | 0.19                  |      |        |       |

| <u>SEM Measured Aspect Ratio</u> |                     |       |       |           |
|----------------------------------|---------------------|-------|-------|-----------|
| Sample #                         | Number of Particles | Min   | Max   | Geom Mean |
| <b>S3003</b>                     | 1428                | 1.003 | 3.576 | 1.455     |

Particle size distribution for PM<sub>2.5</sub>, as well as Teflon filter and betagaugue mass measurements, together with PM<sub>2.5</sub>/PM<sub>10</sub> ratios.

**Sample S3004, USA (Yuma Proving Ground, Arizona, Area 26500R)**

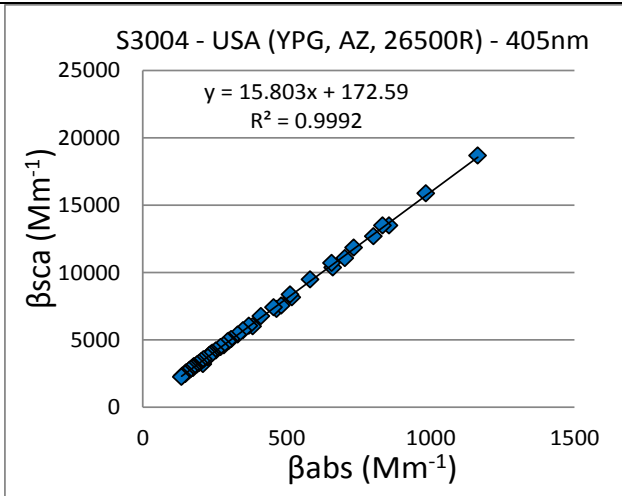

**SSA (405nm) = 0.940**

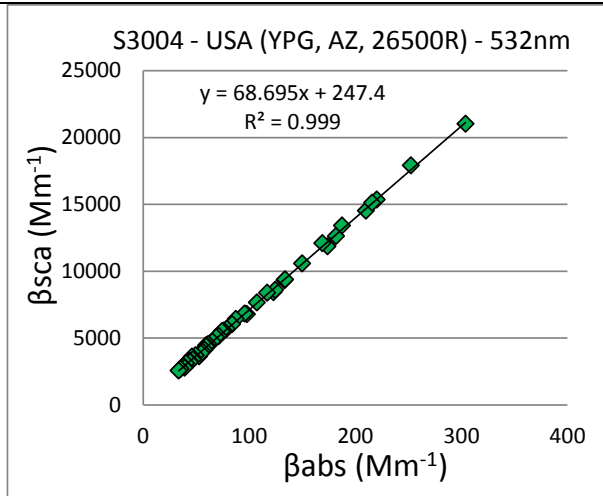

**SSA (532nm) = 0.986**

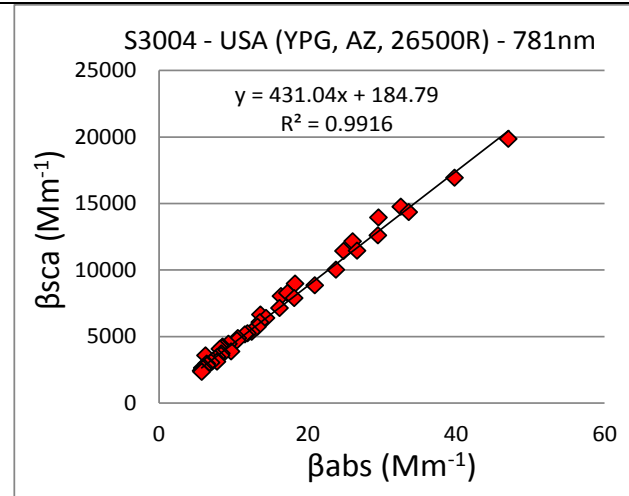

**SSA (781nm) = 0.998**

Optical scattering, absorption and single scattering albedos (SSA) at three wavelengths, where  $SSA = 1/(1 + 1/m)$  and  $m$  is the slope of the above plots.

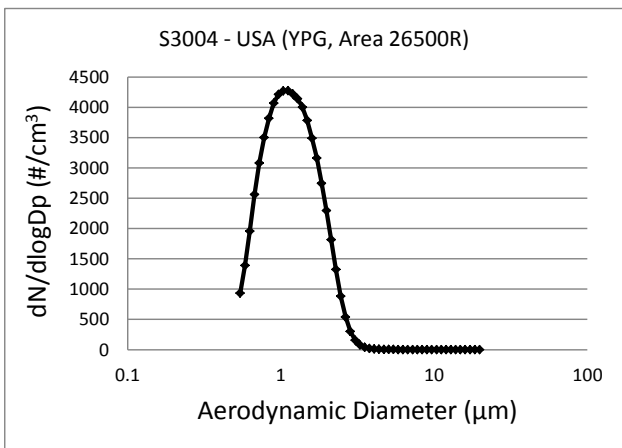

| Median<br>( $\mu\text{m}$ ) | Mean<br>( $\mu\text{m}$ ) | Geo. Mean<br>( $\mu\text{m}$ ) | Mode<br>( $\mu\text{m}$ ) | Geo. Std. Dev.<br>( $\mu\text{m}$ ) |
|-----------------------------|---------------------------|--------------------------------|---------------------------|-------------------------------------|
| 1.144                       | 1.248                     | 1.157                          | 1.071                     | 1.473                               |

| Teflon Filters                      |       |      |       |       |
|-------------------------------------|-------|------|-------|-------|
|                                     | PM10  | PM10 | PM2.5 | PM2.5 |
| Mass ( $\mu\text{g}$ )              | 7390  | 6490 | 2870  | 2760  |
| PM <sub>2.5</sub> /PM <sub>10</sub> | 0.39  | 0.44 | 0.37  | 0.43  |
| Average                             | 0.41  |      |       |       |
| Betagaugue                          |       |      |       |       |
|                                     | PM2.5 |      | PM10  |       |
| Mass ( $\mu\text{g}/\text{m}^3$ )   | 408.8 |      | 921.6 |       |
| PM <sub>2.5</sub> /PM <sub>10</sub> | 0.44  |      |       |       |

| SEM Measured Aspect Ratio |                     |       |       |           |
|---------------------------|---------------------|-------|-------|-----------|
| Sample #                  | Number of Particles | Min   | Max   | Geom Mean |
| <b>S3004</b>              | 1393                | 1.000 | 3.479 | 1.469     |

Particle size distribution for PM<sub>2.5</sub>, as well as Teflon filter and betagaugue mass measurements, together with PM<sub>2.5</sub>/PM<sub>10</sub> ratios.



**Sample S3008, USA (Yuma Proving Ground, Roadrunner Site)**

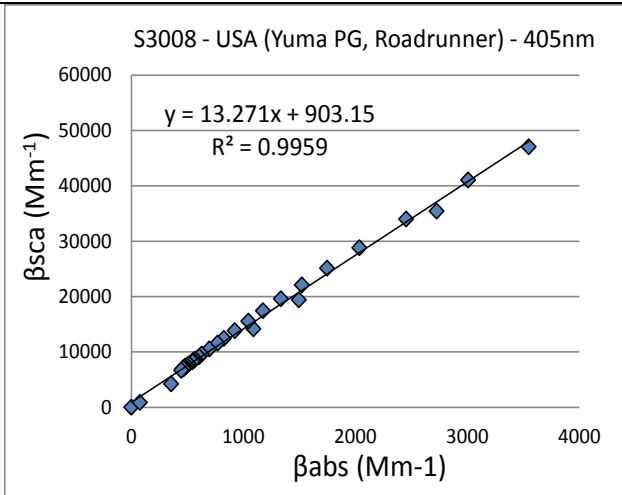

**SSA (405nm) = 0.930**

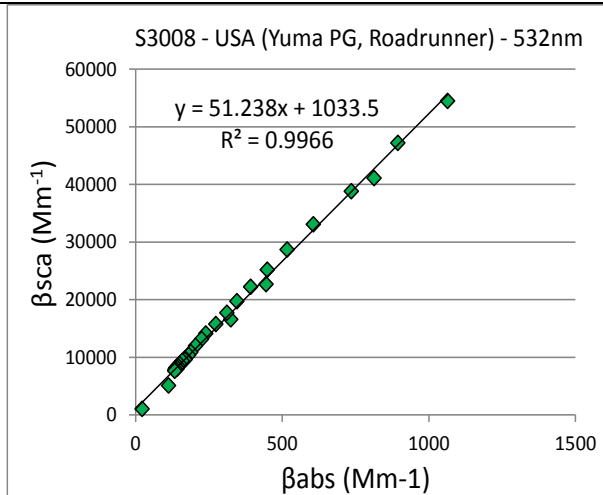

**SSA (532nm) = 0.981**

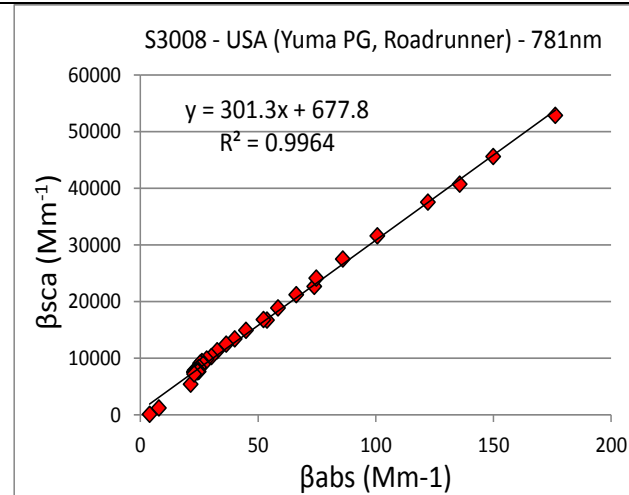

**SSA (781nm) = 0.997**

Optical scattering, absorption and single scattering albedos (SSA) at three wavelengths, where  $SSA = 1/(1 + 1/m)$  and  $m$  is the slope of the above plots.

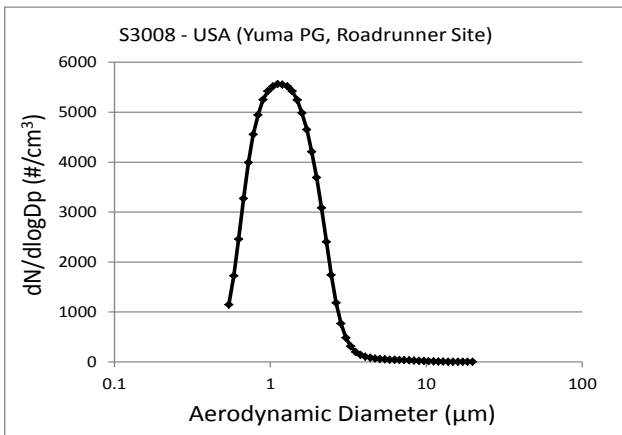

| Median<br>( $\mu\text{m}$ ) | Mean<br>( $\mu\text{m}$ ) | Geo. Mean<br>( $\mu\text{m}$ ) | Mode<br>( $\mu\text{m}$ ) | Geo. Std. Dev.<br>( $\mu\text{m}$ ) |
|-----------------------------|---------------------------|--------------------------------|---------------------------|-------------------------------------|
| 1.201                       | 1.336                     | 1.218                          | 1.156                     | 1.518                               |

|                                   | <u>Teflon Filters</u> |             |              |              |
|-----------------------------------|-----------------------|-------------|--------------|--------------|
|                                   | <u>PM10</u>           | <u>PM10</u> | <u>PM2.5</u> | <u>PM2.5</u> |
| Mass ( $\mu\text{g}$ )            | 24800                 | 22330       | 5230         | 5190         |
| PM2.5/PM10                        | 0.21                  | 0.21        | 0.23         | 0.23         |
| Average                           | 0.22                  |             |              |              |
|                                   |                       |             |              |              |
|                                   | <u>Betagaugue</u>     |             |              |              |
|                                   | <u>PM2.5</u>          |             | <u>PM10</u>  |              |
| Mass ( $\mu\text{g}/\text{m}^3$ ) | 298.2                 |             | 1024         |              |
| PM2.5/PM10                        | 0.29                  |             |              |              |

**SEM Measured Aspect Ratio**

| <u>Sample #</u> | <u>Number of Particles</u> | <u>Min</u> | <u>Max</u> | <u>Geom Mean</u> |
|-----------------|----------------------------|------------|------------|------------------|
| <b>S3008</b>    | 1418                       | 1.000      | 6.300      | 1.499            |

Particle size distribution for  $\text{PM}_{2.5}$ , as well as Teflon filter and betagaugue mass measurements, together with  $\text{PM}_{2.5}/\text{PM}_{10}$  ratios.

**Sample S3011, USA (Ft Carson)**

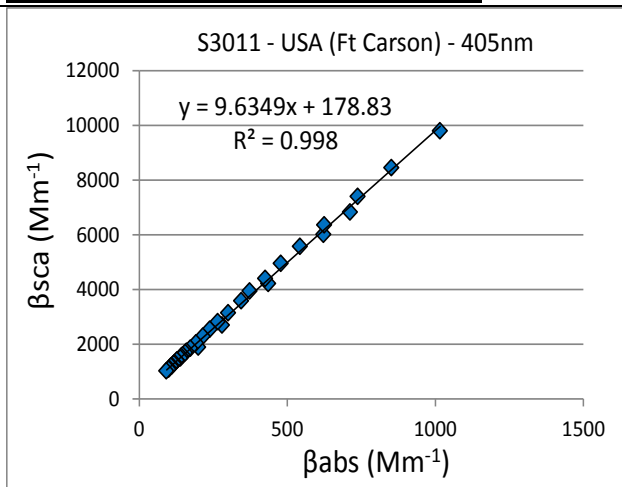

**SSA (405nm) = 0.906**

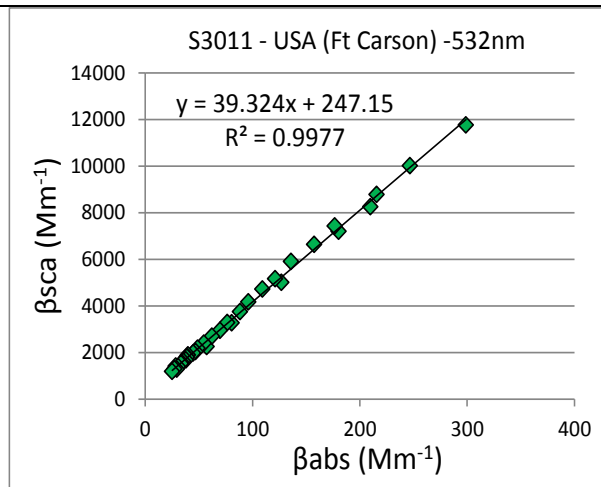

**SSA (532nm) = 0.975**

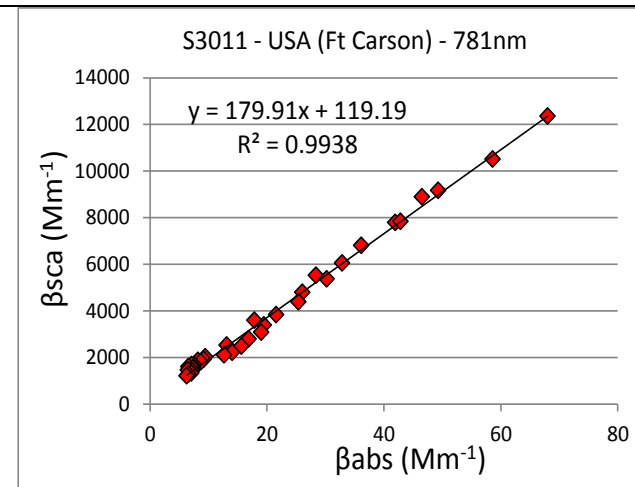

**SSA (781nm) = 0.994**

Optical scattering, absorption and single scattering albedos (SSA) at three wavelengths, where  $SSA = 1/(1 + 1/m)$  and  $m$  is the slope of the above plots.

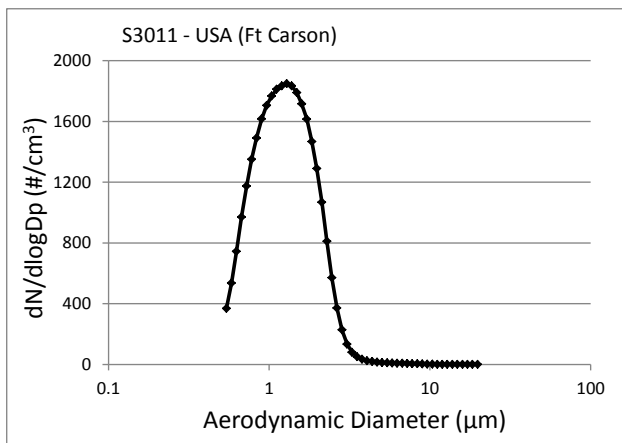

| Median            | Mean              | Geo. Mean         | Mode              | Geo. Std. Dev.    |
|-------------------|-------------------|-------------------|-------------------|-------------------|
| ( $\mu\text{m}$ ) |
| 1.230             | 1.341             | 1.232             | 1.282             | 1.501             |

|                                     | <u>Teflon Filters</u> |             |              |              |
|-------------------------------------|-----------------------|-------------|--------------|--------------|
|                                     | <u>PM10</u>           | <u>PM10</u> | <u>PM2.5</u> | <u>PM2.5</u> |
| Mass ( $\mu\text{g}$ )              | 8460                  | 7570        | 1920         | 1900         |
| PM <sub>2.5</sub> /PM <sub>10</sub> | 0.23                  | 0.25        | 0.22         | 0.25         |
| Average                             | 0.24                  |             |              |              |
|                                     |                       |             |              |              |
|                                     |                       |             |              |              |
|                                     | <u>Betagaugue</u>     |             |              |              |
|                                     | <u>PM2.5</u>          |             | <u>PM10</u>  |              |
| Mass ( $\mu\text{g}/\text{m}^3$ )   | 378.6                 |             | 1316.8       |              |
| PM <sub>2.5</sub> /PM <sub>10</sub> | 0.29                  |             |              |              |

**SEM Measured Aspect Ratio**

| <u>Sample #</u> | <u>Number of</u> | <u>Min</u> | <u>Max</u> | <u>Geom</u> |
|-----------------|------------------|------------|------------|-------------|
|                 | <u>Particles</u> |            |            | <u>Mean</u> |
| <b>S3011</b>    | 1405             | 1.000      | 6.573      | 1.456       |

Particle size distribution for PM<sub>2.5</sub>, as well as Teflon filter and betagaugue mass measurements, together with PM<sub>2.5</sub>/PM<sub>10</sub> ratios.

**Sample S3016, USA (Dugway PG, Lima Site)**

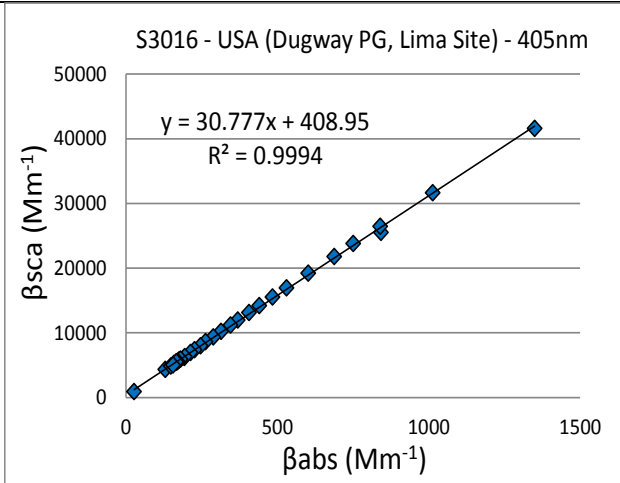

**SSA (405nm) = 0.969**

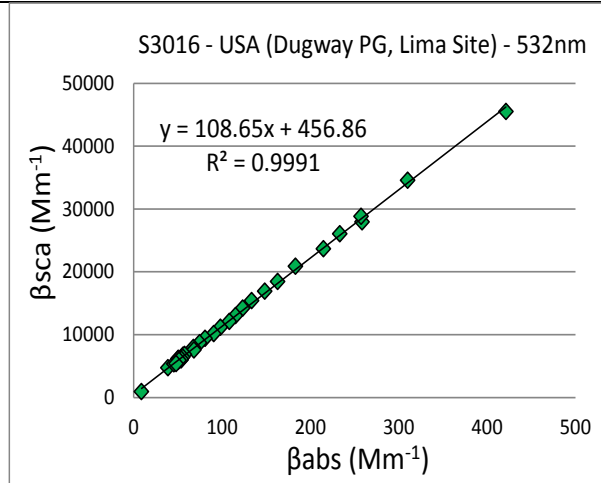

**SSA (532nm) = 0.991**

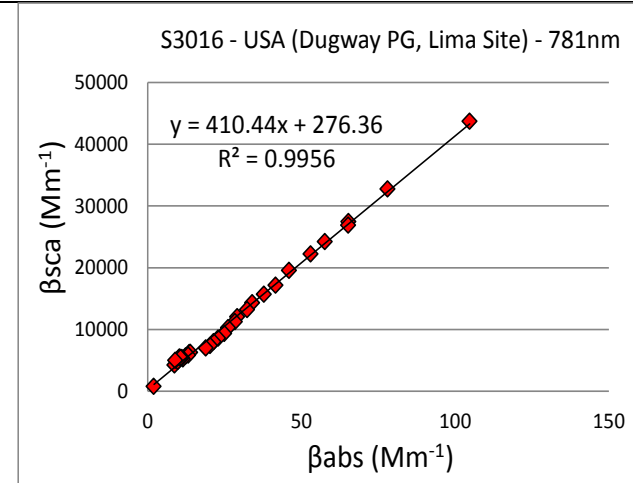

**SSA (781nm) = 0.998**

Optical scattering, absorption and single scattering albedos (SSA) at three wavelengths, where  $SSA = 1/(1 + 1/m)$  and  $m$  is the slope of the above plots.

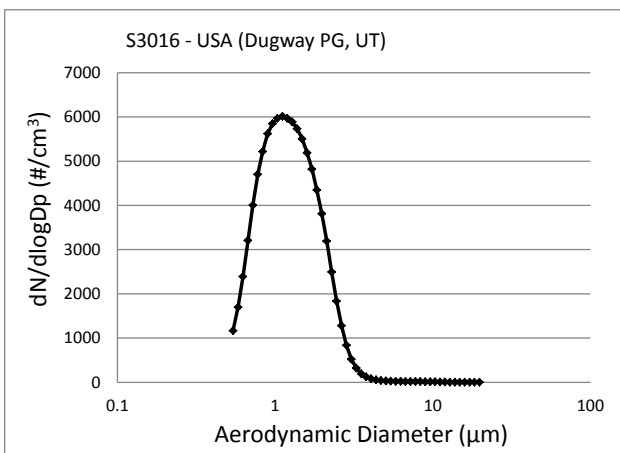

| Median<br>( $\mu m$ ) | Mean<br>( $\mu m$ ) | Geo. Mean<br>( $\mu m$ ) | Mode<br>( $\mu m$ ) | Geo. Std. Dev.<br>( $\mu m$ ) |
|-----------------------|---------------------|--------------------------|---------------------|-------------------------------|
| 1.196                 | 1.326               | 1.214                    | 1.116               | 1.507                         |

| <u>Teflon Filters</u>               |       |       |       |       |
|-------------------------------------|-------|-------|-------|-------|
|                                     | PM10  | PM10  | PM2.5 | PM2.5 |
| Mass ( $\mu g$ )                    | 14660 | 13780 | 4800  | 4830  |
| PM <sub>2.5</sub> /PM <sub>10</sub> | 0.33  | 0.33  | 0.35  | 0.35  |
| Average                             | 0.34  |       |       |       |
|                                     |       |       |       |       |
| <u>Betagaugue</u>                   |       |       |       |       |
|                                     | PM2.5 | PM10  |       |       |
| Mass ( $\mu g/m^3$ )                | 282   | 955.6 |       |       |
| PM <sub>2.5</sub> /PM <sub>10</sub> | 0.30  |       |       |       |

**SEM Measured Aspect Ratio**

| Sample #     | Number of Particles | Min   | Max   | Geom. Mean |
|--------------|---------------------|-------|-------|------------|
| <b>S3016</b> | 1361                | 1.000 | 5.121 | 1.546      |

Particle size distribution for PM<sub>2.5</sub>, as well as Teflon filter and betagaugue mass measurements, together with PM<sub>2.5</sub>/PM<sub>10</sub> ratios.

**Sample S3017, USA (Dugway PG, UT, X-ray site)**

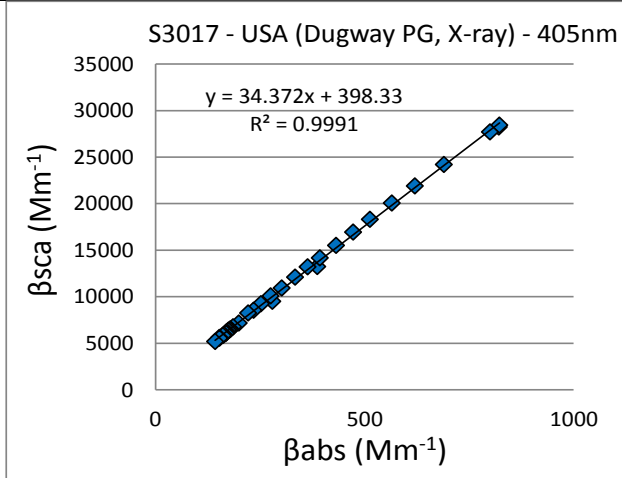

**SSA (405nm) = 0.972**

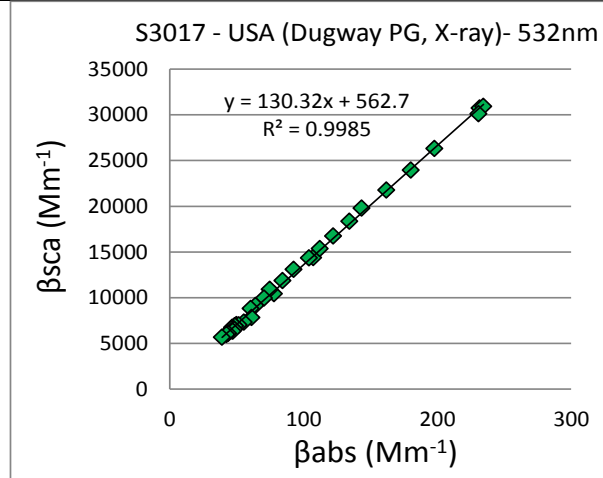

**SSA (532nm) = 0.992**

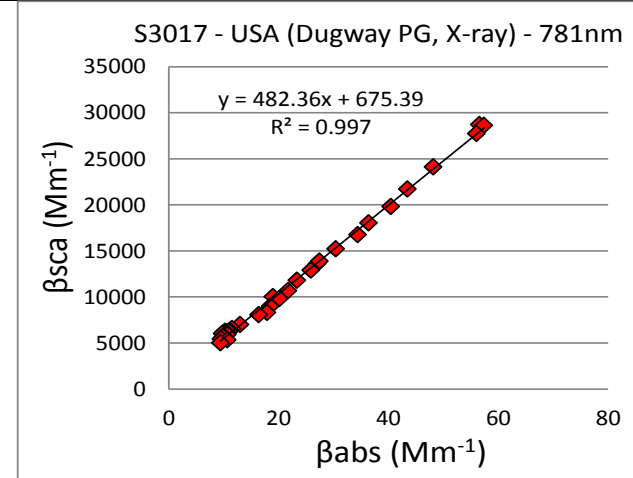

**SSA (781nm) = 0.998**

Optical scattering, absorption and single scattering albedos (SSA) at three wavelengths, where  $SSA = 1/(1 + 1/m)$  and  $m$  is the slope of the above plots.

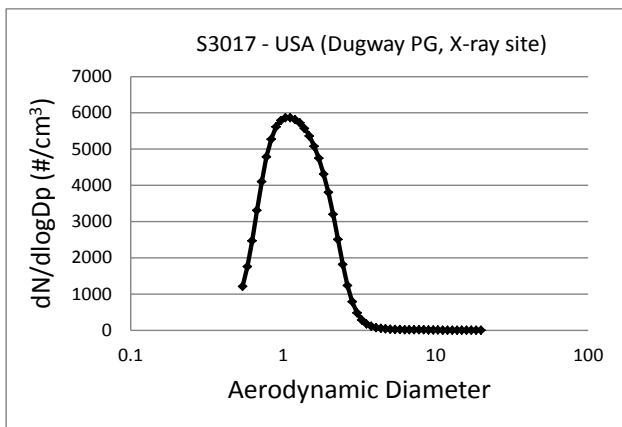

| Median            | Mean              | Geo. Mean         | Mode              | Geo. Std. Dev.    |
|-------------------|-------------------|-------------------|-------------------|-------------------|
| ( $\mu\text{m}$ ) |
| 1.188             | 1.318             | 1.207             | 1.083             | 1.507             |

|                                     | <u>Teflon Filters</u> |             |              |              |
|-------------------------------------|-----------------------|-------------|--------------|--------------|
|                                     | <u>PM10</u>           | <u>PM10</u> | <u>PM2.5</u> | <u>PM2.5</u> |
| Mass ( $\mu\text{g}$ )              | 18600                 | 17000       | 5780         | 6020         |
| PM <sub>2.5</sub> /PM <sub>10</sub> | 0.31                  | 0.32        | 0.34         | 0.35         |
| Average                             | 0.33                  |             |              |              |
|                                     | <u>Betagaugue</u>     |             |              |              |
|                                     | <u>PM2.5</u>          |             | <u>PM10</u>  |              |
| Mass ( $\mu\text{g}/\text{m}^3$ )   | 172.8                 |             | 530.5        |              |
| PM <sub>2.5</sub> /PM <sub>10</sub> | 0.33                  |             |              |              |

| <u>SEM Measured Aspect Ratio</u> |                            |            |            |                  |
|----------------------------------|----------------------------|------------|------------|------------------|
| <u>Sample #</u>                  | <u>Number of Particles</u> | <u>Min</u> | <u>Max</u> | <u>Geom Mean</u> |
| <b>S3017</b>                     | 1324                       | 1.000      | 5.115      | 1.536            |

Particle size distribution for PM<sub>2.5</sub>, as well as Teflon filter and betagaugue mass measurements, together with PM<sub>2.5</sub>/PM<sub>10</sub> ratios.

Supplement S4.1 - Chemical Concentrations (mass %) of Grab Soil Samples Re-suspended onto Filters, for PM<sub>10</sub> and PM<sub>2.5</sub> Fractions

| Sample #                      | S1000             |     |                   |     | S1005                               |     |                   |     | S1006                               |     |                    |     | S1007                             |     |                   |     |  |
|-------------------------------|-------------------|-----|-------------------|-----|-------------------------------------|-----|-------------------|-----|-------------------------------------|-----|--------------------|-----|-----------------------------------|-----|-------------------|-----|--|
|                               | Unknown           |     |                   |     | Spain, Lanzarote, La Mala, Sample 1 |     |                   |     | Spain, Lanzarote, La Mala, Sample 2 |     |                    |     | Spain, Lanzarote, Mirador del Rio |     |                   |     |  |
|                               | PM <sub>10</sub>  |     | PM <sub>2.5</sub> |     | PM <sub>10</sub>                    |     | PM <sub>2.5</sub> |     | PM <sub>10</sub>                    |     | PM <sub>2.5</sub>  |     | PM <sub>10</sub>                  |     | PM <sub>2.5</sub> |     |  |
|                               | Conc              | Unc | Conc              | Unc | Conc                                | Unc | Conc              | Unc | Conc                                | Unc | Conc               | Unc | Conc                              | Unc | Conc              | Unc |  |
| %                             | %                 | %   | %                 | %   | %                                   | %   | %                 | %   | %                                   | %   | %                  | %   | %                                 | %   | %                 | %   |  |
| <b>Majors</b>                 |                   |     |                   |     |                                     |     |                   |     |                                     |     |                    |     |                                   |     |                   |     |  |
| Si                            | 0.247 ± 0.014     |     | 0.193 ± 0.013     |     | 4.896 ± 0.026                       |     | 6.960 ± 0.058     |     | 2.586 ± 0.013                       |     | 4.213 ± 0.021      |     | 5.877 ± 0.018                     |     | 7.366 ± 0.036     |     |  |
| Ti                            | 0.000 ± 0.008     |     | 0.000 ± 0.008     |     | 0.127 ± 0.005                       |     | 0.152 ± 0.012     |     | 0.094 ± 0.002                       |     | 0.123 ± 0.004      |     | 0.405 ± 0.004                     |     | 0.420 ± 0.008     |     |  |
| Al                            | 0.323 ± 0.028     |     | 0.275 ± 0.025     |     | 1.621 ± 0.031                       |     | 2.584 ± 0.080     |     | 0.995 ± 0.018                       |     | 1.692 ± 0.028      |     | 1.802 ± 0.019                     |     | 2.363 ± 0.043     |     |  |
| Fe                            | 60.662 ± 0.103    |     | 56.729 ± 0.095    |     | 1.606 ± 0.006                       |     | 2.109 ± 0.014     |     | 1.061 ± 0.003                       |     | 1.574 ± 0.006      |     | 3.010 ± 0.006                     |     | 3.196 ± 0.011     |     |  |
| Mg                            | 0.000 ± 0.012     |     | 0.000 ± 0.012     |     | 0.758 ± 0.010                       |     | 1.496 ± 0.029     |     | 0.777 ± 0.004                       |     | 1.517 ± 0.010      |     | 1.521 ± 0.007                     |     | 3.078 ± 0.018     |     |  |
| Ca                            | 0.090 ± 0.005     |     | 0.036 ± 0.005     |     | 14.291 ± 0.027                      |     | 18.754 ± 0.045    |     | 19.751 ± 0.035                      |     | 24.908 ± 0.045     |     | 11.153 ± 0.020                    |     | 15.825 ± 0.031    |     |  |
| K                             | 0.007 ± 0.007     |     | 0.016 ± 0.007     |     | 0.730 ± 0.006                       |     | 0.916 ± 0.017     |     | 0.330 ± 0.004                       |     | 0.497 ± 0.005      |     | 0.954 ± 0.004                     |     | 1.056 ± 0.008     |     |  |
| <b>Traces</b>                 |                   |     |                   |     |                                     |     |                   |     |                                     |     |                    |     |                                   |     |                   |     |  |
| As                            | 0.00356 ± 0.00162 |     | 0.00578 ± 0.00250 |     | 0.01150 ± 0.00096                   |     | 0.03117 ± 0.00376 |     | 0.00412 ± 0.00026                   |     | 0.00816 ± 0.00072  |     | 0.00479 ± 0.00031                 |     | 0.01025 ± 0.00128 |     |  |
| Be                            | 0.00001 ± 0.00041 |     | 0.00002 ± 0.00040 |     | 0.00007 ± 0.00024                   |     | 0.00017 ± 0.00094 |     | 0.00004 ± 0.00007                   |     | 0.00007 ± 0.00018  |     | 0.00010 ± 0.00008                 |     | 0.00010 ± 0.00032 |     |  |
| Cd                            | 0.00000 ± 0.00041 |     | 0.00000 ± 0.00040 |     | 0.00001 ± 0.00024                   |     | 0.00001 ± 0.00094 |     | 0.00001 ± 0.00007                   |     | 0.00002 ± 0.00018  |     | 0.00003 ± 0.00008                 |     | 0.00002 ± 0.00032 |     |  |
| Cr                            | 0.06455 ± 0.00081 |     | 0.07790 ± 0.00080 |     | 0.01954 ± 0.00048                   |     | 0.04135 ± 0.00188 |     | 0.00592 ± 0.00013                   |     | 0.01205 ± 0.00036  |     | 0.00965 ± 0.00015                 |     | 0.01653 ± 0.00064 |     |  |
| Hg                            | 0.00032 ± 0.00081 |     | 0.00016 ± 0.00080 |     | 0.00000 ± 0.00048                   |     | 0.00043 ± 0.00188 |     | 0.00001 ± 0.00013                   |     | -0.00006 ± 0.00036 |     | 0.00005 ± 0.00015                 |     | 0.00015 ± 0.00064 |     |  |
| Mn                            | 0.01323 ± 0.00162 |     | 0.01460 ± 0.00161 |     | 0.03250 ± 0.00096                   |     | 0.03346 ± 0.00376 |     | 0.01656 ± 0.00026                   |     | 0.02132 ± 0.00072  |     | 0.02358 ± 0.00031                 |     | 0.02480 ± 0.00128 |     |  |
| Ni                            | 0.00324 ± 0.00162 |     | 0.00283 ± 0.00161 |     | 0.00497 ± 0.00096                   |     | 0.00617 ± 0.00376 |     | 0.00382 ± 0.00026                   |     | 0.00520 ± 0.00072  |     | 0.00629 ± 0.00031                 |     | 0.00667 ± 0.00128 |     |  |
| Pb                            | 0.00102 ± 0.00041 |     | 0.00106 ± 0.00040 |     | 0.00054 ± 0.00024                   |     | 0.00087 ± 0.00094 |     | 0.00027 ± 0.00007                   |     | 0.00046 ± 0.00018  |     | 0.00069 ± 0.00008                 |     | 0.00063 ± 0.00032 |     |  |
| Sb                            | 0.00043 ± 0.00041 |     | 0.00053 ± 0.00040 |     | 0.00012 ± 0.00024                   |     | 0.00066 ± 0.00094 |     | 0.00006 ± 0.00007                   |     | 0.00020 ± 0.00018  |     | 0.00010 ± 0.00008                 |     | 0.00013 ± 0.00032 |     |  |
| Sr                            | 0.00061 ± 0.00041 |     | 0.00170 ± 0.00040 |     | 0.08601 ± 0.00034                   |     | 0.07686 ± 0.00094 |     | 0.11158 ± 0.00025                   |     | 0.11456 ± 0.00018  |     | 0.04566 ± 0.00008                 |     | 0.05347 ± 0.00036 |     |  |
| V                             | 0.00460 ± 0.00041 |     | 0.00391 ± 0.00040 |     | 0.00297 ± 0.00024                   |     | 0.00347 ± 0.00094 |     | 0.00206 ± 0.00007                   |     | 0.00263 ± 0.00018  |     | 0.00849 ± 0.00008                 |     | 0.00812 ± 0.00032 |     |  |
| Zn                            | 0.03208 ± 0.00162 |     | 0.02968 ± 0.00161 |     | 0.00667 ± 0.00096                   |     | 0.02293 ± 0.00376 |     | 0.00303 ± 0.00026                   |     | 0.00512 ± 0.00072  |     | 0.00759 ± 0.00031                 |     | 0.01742 ± 0.00128 |     |  |
| <b>Ions</b>                   |                   |     |                   |     |                                     |     |                   |     |                                     |     |                    |     |                                   |     |                   |     |  |
| CL <sup>-</sup>               | 0.129 ± 0.009     |     | 0.208 ± 0.013     |     | 0.245 ± 0.014                       |     | 0.676 ± 0.042     |     | 0.075 ± 0.004                       |     | 0.208 ± 0.012      |     | 0.513 ± 0.026                     |     | 0.709 ± 0.038     |     |  |
| NO <sub>3</sub> <sup>-</sup>  | 0.158 ± 0.017     |     | 0.107 ± 0.016     |     | 0.083 ± 0.009                       |     | 0.384 ± 0.050     |     | 0.018 ± 0.002                       |     | 0.076 ± 0.008      |     | 0.040 ± 0.004                     |     | 0.286 ± 0.022     |     |  |
| PO <sub>4</sub> <sup>3-</sup> | 0.000 ± 0.012     |     | 0.000 ± 0.013     |     | 0.113 ± 0.012                       |     | 0.300 ± 0.053     |     | 0.036 ± 0.004                       |     | 0.105 ± 0.011      |     | 0.096 ± 0.008                     |     | 0.204 ± 0.020     |     |  |
| SO <sub>4</sub> <sup>2-</sup> | 0.289 ± 0.025     |     | 0.277 ± 0.025     |     | 0.237 ± 0.017                       |     | 0.558 ± 0.060     |     | 0.064 ± 0.005                       |     | 0.212 ± 0.015      |     | 0.453 ± 0.025                     |     | 0.507 ± 0.034     |     |  |
| NH <sub>4</sub> <sup>+</sup>  | 0.049 ± 0.004     |     | 0.071 ± 0.005     |     | 0.022 ± 0.002                       |     | 0.071 ± 0.009     |     | 0.011 ± 0.001                       |     | 0.022 ± 0.002      |     | 0.012 ± 0.001                     |     | 0.043 ± 0.004     |     |  |
| Ca <sup>2+</sup>              | 0.107 ± 0.147     |     | 0.136 ± 0.160     |     | 19.443 ± 0.359                      |     | 27.136 ± 0.471    |     | 9.542 ± 0.025                       |     | 22.647 ± 0.448     |     | 9.938 ± 0.037                     |     | 14.927 ± 0.448    |     |  |
| K <sup>+</sup>                | 0.026 ± 0.147     |     | 0.006 ± 0.160     |     | 0.208 ± 0.076                       |     | 0.403 ± 0.471     |     | 0.084 ± 0.025                       |     | 0.165 ± 0.071      |     | 0.241 ± 0.037                     |     | 0.361 ± 0.126     |     |  |
| Mg <sup>2+</sup>              | 0.021 ± 0.147     |     | 0.025 ± 0.160     |     | 0.986 ± 0.076                       |     | 1.558 ± 0.471     |     | 0.605 ± 0.025                       |     | 1.265 ± 0.071      |     | 1.454 ± 0.037                     |     | 2.828 ± 0.126     |     |  |
| Na <sup>+</sup>               | 0.046 ± 0.147     |     | 0.044 ± 0.160     |     | 0.144 ± 0.076                       |     | 0.259 ± 0.471     |     | 0.090 ± 0.025                       |     | 0.175 ± 0.071      |     | 0.546 ± 0.037                     |     | 0.589 ± 0.126     |     |  |

Supplement S4.1 - Chemical Concentrations (mass %) of Grab Soil Samples Re-suspended onto Filters, for PM<sub>10</sub> and PM<sub>2.5</sub> Fractions

| Sample #                      | S1008                           |     |                   |     | S1009              |     |                   |     | S1010             |     |                    |     | S1011             |     |                   |     |
|-------------------------------|---------------------------------|-----|-------------------|-----|--------------------|-----|-------------------|-----|-------------------|-----|--------------------|-----|-------------------|-----|-------------------|-----|
| Locality                      | Spain, Lanzarote, Vega de Femes |     |                   |     | Mali, above Bamako |     |                   |     | Mali, Bamako      |     |                    |     | Mali, West Bamako |     |                   |     |
| Particle Size                 | PM <sub>10</sub>                |     | PM <sub>2.5</sub> |     | PM <sub>10</sub>   |     | PM <sub>2.5</sub> |     | PM <sub>10</sub>  |     | PM <sub>2.5</sub>  |     | PM <sub>10</sub>  |     | PM <sub>2.5</sub> |     |
|                               | Conc                            | Unc | Conc              | Unc | Conc               | Unc | Conc              | Unc | Conc              | Unc | Conc               | Unc | Conc              | Unc | Conc              | Unc |
|                               | %                               | %   | %                 | %   | %                  | %   | %                 | %   | %                 | %   | %                  | %   | %                 | %   | %                 | %   |
| <b>Majors</b>                 |                                 |     |                   |     |                    |     |                   |     |                   |     |                    |     |                   |     |                   |     |
| Si                            | 15.546 ± 0.035                  |     | 17.999 ± 0.052    |     | 8.952 ± 0.028      |     | 10.586 ± 0.030    |     | 10.173 ± 0.037    |     | 11.378 ± 0.047     |     | 9.202 ± 0.026     |     | 11.180 ± 0.040    |     |
| Ti                            | 1.028 ± 0.006                   |     | 1.044 ± 0.010     |     | 0.422 ± 0.006      |     | 0.446 ± 0.006     |     | 0.512 ± 0.008     |     | 0.524 ± 0.011      |     | 0.543 ± 0.006     |     | 0.525 ± 0.009     |     |
| Al                            | 5.569 ± 0.027                   |     | 6.887 ± 0.050     |     | 7.968 ± 0.038      |     | 9.321 ± 0.039     |     | 7.042 ± 0.046     |     | 8.467 ± 0.062      |     | 7.970 ± 0.034     |     | 9.947 ± 0.055     |     |
| Fe                            | 6.715 ± 0.012                   |     | 6.911 ± 0.016     |     | 16.176 ± 0.028     |     | 13.965 ± 0.024    |     | 12.819 ± 0.025    |     | 12.659 ± 0.027     |     | 18.061 ± 0.030    |     | 18.256 ± 0.033    |     |
| Mg                            | 0.064 ± 0.007                   |     | 0.202 ± 0.013     |     | 0.000 ± 0.007      |     | 0.000 ± 0.007     |     | 0.000 ± 0.010     |     | 0.000 ± 0.015      |     | 0.000 ± 0.006     |     | 0.000 ± 0.012     |     |
| Ca                            | 1.552 ± 0.004                   |     | 1.598 ± 0.006     |     | 0.710 ± 0.003      |     | 0.582 ± 0.003     |     | 0.472 ± 0.003     |     | 0.473 ± 0.005      |     | 0.299 ± 0.002     |     | 0.357 ± 0.003     |     |
| K                             | 2.718 ± 0.006                   |     | 2.985 ± 0.010     |     | 0.253 ± 0.002      |     | 0.291 ± 0.002     |     | 0.502 ± 0.004     |     | 0.533 ± 0.006      |     | 0.291 ± 0.002     |     | 0.310 ± 0.004     |     |
| <b>Traces</b>                 |                                 |     |                   |     |                    |     |                   |     |                   |     |                    |     |                   |     |                   |     |
| As                            | 0.00046 ± 0.00032               |     | 0.00076 ± 0.00093 |     | 0.00554 ± 0.00056  |     | 0.00008 ± 0.00047 |     | 0.01018 ± 0.00094 |     | 0.00015 ± 0.00146  |     | 0.00023 ± 0.00043 |     | 0.00043 ± 0.00097 |     |
| Be                            | 0.00016 ± 0.00008               |     | 0.00017 ± 0.00023 |     | 0.00004 ± 0.00014  |     | 0.00005 ± 0.00012 |     | 0.00006 ± 0.00023 |     | 0.00010 ± 0.00036  |     | 0.00004 ± 0.00011 |     | 0.00003 ± 0.00024 |     |
| Cd                            | 0.00005 ± 0.00008               |     | 0.00006 ± 0.00023 |     | 0.00003 ± 0.00014  |     | 0.00003 ± 0.00012 |     | 0.00047 ± 0.00023 |     | 0.00001 ± 0.00036  |     | 0.00001 ± 0.00011 |     | 0.00001 ± 0.00024 |     |
| Cr                            | 0.01254 ± 0.00016               |     | 0.02618 ± 0.00046 |     | 0.08206 ± 0.00052  |     | 0.14291 ± 0.00095 |     | 0.08367 ± 0.00047 |     | 0.16385 ± 0.00146  |     | 0.05855 ± 0.00036 |     | 0.07403 ± 0.00049 |     |
| Hg                            | 0.00006 ± 0.00016               |     | 0.00015 ± 0.00046 |     | 0.00000 ± 0.00028  |     | 0.00002 ± 0.00024 |     | 0.00000 ± 0.00047 |     | -0.00002 ± 0.00073 |     | 0.00007 ± 0.00021 |     | 0.00012 ± 0.00049 |     |
| Mn                            | 0.06110 ± 0.00040               |     | 0.07915 ± 0.00093 |     | 0.03303 ± 0.00056  |     | 0.04020 ± 0.00047 |     | 0.04337 ± 0.00094 |     | 0.05586 ± 0.00146  |     | 0.03399 ± 0.00043 |     | 0.03559 ± 0.00103 |     |
| Ni                            | 0.00823 ± 0.00032               |     | 0.01039 ± 0.00093 |     | 0.00294 ± 0.00056  |     | 0.00995 ± 0.00047 |     | 0.00618 ± 0.00094 |     | 0.01281 ± 0.00146  |     | 0.00280 ± 0.00043 |     | 0.00343 ± 0.00097 |     |
| Pb                            | 0.00109 ± 0.00008               |     | 0.00126 ± 0.00023 |     | 0.00956 ± 0.00014  |     | 0.00970 ± 0.00012 |     | 0.00208 ± 0.00023 |     | 0.00280 ± 0.00036  |     | 0.00154 ± 0.00011 |     | 0.00154 ± 0.00024 |     |
| Sb                            | 0.00003 ± 0.00008               |     | 0.00006 ± 0.00023 |     | 0.00011 ± 0.00014  |     | 0.00011 ± 0.00012 |     | 0.00012 ± 0.00023 |     | 0.00014 ± 0.00036  |     | 0.00003 ± 0.00011 |     | 0.00005 ± 0.00024 |     |
| Sr                            | 0.00654 ± 0.00008               |     | 0.00761 ± 0.00023 |     | 0.00198 ± 0.00014  |     | 0.00265 ± 0.00012 |     | 0.00192 ± 0.00023 |     | 0.00400 ± 0.00036  |     | 0.00213 ± 0.00011 |     | 0.00292 ± 0.00024 |     |
| V                             | 0.00735 ± 0.00008               |     | 0.00772 ± 0.00023 |     | 0.00716 ± 0.00014  |     | 0.00711 ± 0.00012 |     | 0.00757 ± 0.00023 |     | 0.00829 ± 0.00036  |     | 0.00690 ± 0.00011 |     | 0.00623 ± 0.00024 |     |
| Zn                            | 0.01082 ± 0.00032               |     | 0.01279 ± 0.00093 |     | 0.04341 ± 0.00056  |     | 0.04385 ± 0.00047 |     | 0.01079 ± 0.00094 |     | 0.02891 ± 0.00146  |     | 0.00511 ± 0.00043 |     | 0.00703 ± 0.00097 |     |
| <b>Ions</b>                   |                                 |     |                   |     |                    |     |                   |     |                   |     |                    |     |                   |     |                   |     |
| CL <sup>-</sup>               | 0.318 ± 0.017                   |     | 0.836 ± 0.044     |     | 0.144 ± 0.008      |     | 0.108 ± 0.006     |     | 0.625 ± 0.033     |     | 0.135 ± 0.010      |     | 0.129 ± 0.007     |     | 0.240 ± 0.014     |     |
| NO <sub>3</sub> <sup>-</sup>  | 0.037 ± 0.005                   |     | 0.087 ± 0.012     |     | 0.106 ± 0.010      |     | 0.045 ± 0.006     |     | 0.105 ± 0.012     |     | 0.142 ± 0.018      |     | 0.051 ± 0.006     |     | 0.074 ± 0.012     |     |
| PO <sub>4</sub> <sup>3-</sup> | 0.047 ± 0.006                   |     | 0.082 ± 0.014     |     | 0.000 ± 0.005      |     | 0.000 ± 0.004     |     | 0.054 ± 0.012     |     | 0.069 ± 0.017      |     | 0.108 ± 0.010     |     | 0.184 ± 0.020     |     |
| SO <sub>4</sub> <sup>2-</sup> | 0.062 ± 0.006                   |     | 0.107 ± 0.014     |     | 0.071 ± 0.008      |     | 0.084 ± 0.008     |     | 0.155 ± 0.015     |     | 0.161 ± 0.019      |     | 0.100 ± 0.009     |     | 0.152 ± 0.016     |     |
| NH <sub>4</sub> <sup>+</sup>  | 0.055 ± 0.003                   |     | 0.246 ± 0.014     |     | 0.051 ± 0.003      |     | 0.082 ± 0.005     |     | 0.235 ± 0.013     |     | 0.102 ± 0.007      |     | 0.078 ± 0.005     |     | 0.098 ± 0.006     |     |
| Ca <sup>2+</sup>              | 1.278 ± 0.046                   |     | 1.519 ± 0.122     |     | 0.581 ± 0.066      |     | 0.576 ± 0.051     |     | 0.440 ± 0.111     |     | 0.640 ± 0.164      |     | 0.317 ± 0.054     |     | 0.476 ± 0.129     |     |
| K <sup>+</sup>                | 0.186 ± 0.046                   |     | 0.310 ± 0.122     |     | 0.096 ± 0.066      |     | 0.059 ± 0.051     |     | 0.100 ± 0.111     |     | 0.148 ± 0.164      |     | 0.057 ± 0.054     |     | 0.074 ± 0.129     |     |
| Mg <sup>2+</sup>              | 0.223 ± 0.046                   |     | 0.339 ± 0.122     |     | 0.082 ± 0.066      |     | 0.077 ± 0.051     |     | 0.097 ± 0.111     |     | 0.121 ± 0.164      |     | 0.066 ± 0.054     |     | 0.092 ± 0.129     |     |
| Na <sup>+</sup>               | 0.143 ± 0.046                   |     | 0.236 ± 0.122     |     | 0.036 ± 0.066      |     | 0.007 ± 0.051     |     | 0.057 ± 0.111     |     | 0.025 ± 0.164      |     | 0.026 ± 0.054     |     | 0.078 ± 0.129     |     |

Supplement S4.1 - Chemical Concentrations (mass %) of Grab Soil Samples Re-suspended onto Filters, for PM<sub>10</sub> and PM<sub>2.5</sub> Fractions

| Sample #                      | S1013                                    |     |                   |     | S1014             |     |                   |     | S1016             |     |                   |     | S1017             |     |                   |     |                          |  |  |  |
|-------------------------------|------------------------------------------|-----|-------------------|-----|-------------------|-----|-------------------|-----|-------------------|-----|-------------------|-----|-------------------|-----|-------------------|-----|--------------------------|--|--|--|
|                               | Cape Verde, Sala Is, Punta Fiure, Site A |     |                   |     |                   |     |                   |     | China, Karamay 1  |     |                   |     | China, Karamay 2  |     |                   |     | China, Xinjiang Sample 1 |  |  |  |
|                               | PM <sub>10</sub>                         |     | PM <sub>2.5</sub> |     | PM <sub>10</sub>  |     | PM <sub>2.5</sub> |     | PM <sub>10</sub>  |     | PM <sub>2.5</sub> |     | PM <sub>10</sub>  |     | PM <sub>2.5</sub> |     |                          |  |  |  |
|                               | Conc                                     | Unc | Conc              | Unc | Conc              | Unc | Conc              | Unc | Conc              | Unc | Conc              | Unc | Conc              | Unc | Conc              | Unc |                          |  |  |  |
| %                             | %                                        | %   | %                 | %   | %                 | %   | %                 | %   | %                 | %   | %                 | %   | %                 | %   | %                 |     |                          |  |  |  |
| <b>Majors</b>                 |                                          |     |                   |     |                   |     |                   |     |                   |     |                   |     |                   |     |                   |     |                          |  |  |  |
| Si                            | 7.231 ± 0.023                            |     | 9.615 ± 0.035     |     | 14.634 ± 0.034    |     | 16.333 ± 0.052    |     | 15.556 ± 0.044    |     | 16.157 ± 0.069    |     | 13.026 ± 0.035    |     | 16.335 ± 0.045    |     |                          |  |  |  |
| Ti                            | 0.282 ± 0.003                            |     | 0.300 ± 0.005     |     | 0.343 ± 0.004     |     | 0.360 ± 0.007     |     | 0.346 ± 0.006     |     | 0.344 ± 0.011     |     | 0.214 ± 0.004     |     | 0.227 ± 0.005     |     |                          |  |  |  |
| Al                            | 2.777 ± 0.025                            |     | 3.865 ± 0.036     |     | 5.033 ± 0.027     |     | 6.042 ± 0.050     |     | 5.052 ± 0.038     |     | 5.609 ± 0.072     |     | 2.748 ± 0.029     |     | 3.469 ± 0.036     |     |                          |  |  |  |
| Fe                            | 3.020 ± 0.006                            |     | 3.414 ± 0.009     |     | 4.510 ± 0.009     |     | 4.845 ± 0.013     |     | 4.045 ± 0.010     |     | 4.042 ± 0.015     |     | 3.185 ± 0.008     |     | 3.753 ± 0.010     |     |                          |  |  |  |
| Mg                            | 0.515 ± 0.006                            |     | 1.033 ± 0.012     |     | 0.399 ± 0.008     |     | 0.709 ± 0.015     |     | 0.390 ± 0.011     |     | 0.663 ± 0.023     |     | 1.826 ± 0.011     |     | 2.648 ± 0.015     |     |                          |  |  |  |
| Ca                            | 12.816 ± 0.023                           |     | 13.455 ± 0.025    |     | 4.114 ± 0.009     |     | 3.822 ± 0.011     |     | 2.332 ± 0.007     |     | 2.269 ± 0.011     |     | 4.979 ± 0.011     |     | 2.763 ± 0.008     |     |                          |  |  |  |
| K                             | 1.214 ± 0.005                            |     | 1.474 ± 0.006     |     | 2.349 ± 0.006     |     | 2.594 ± 0.010     |     | 2.078 ± 0.007     |     | 2.081 ± 0.012     |     | 2.522 ± 0.007     |     | 2.996 ± 0.009     |     |                          |  |  |  |
| <b>Traces</b>                 |                                          |     |                   |     |                   |     |                   |     |                   |     |                   |     |                   |     |                   |     |                          |  |  |  |
| As                            | 0.00057 ± 0.00016                        |     | 0.00088 ± 0.00066 |     | 0.00156 ± 0.00034 |     | 0.00219 ± 0.00108 |     | 0.00104 ± 0.00070 |     | 0.00117 ± 0.00223 |     | 0.01098 ± 0.00054 |     | 0.00448 ± 0.00072 |     |                          |  |  |  |
| Be                            | 0.00009 ± 0.00004                        |     | 0.00011 ± 0.00017 |     | 0.00016 ± 0.00008 |     | 0.00015 ± 0.00027 |     | 0.00015 ± 0.00018 |     | 0.00018 ± 0.00056 |     | 0.00011 ± 0.00014 |     | 0.00015 ± 0.00018 |     |                          |  |  |  |
| Cd                            | 0.00034 ± 0.00004                        |     | 0.00033 ± 0.00017 |     | 0.00002 ± 0.00008 |     | 0.00002 ± 0.00027 |     | 0.00001 ± 0.00018 |     | 0.00002 ± 0.00056 |     | 0.00002 ± 0.00014 |     | 0.00002 ± 0.00018 |     |                          |  |  |  |
| Cr                            | 0.00562 ± 0.00008                        |     | 0.01673 ± 0.00033 |     | 0.01463 ± 0.00017 |     | 0.04051 ± 0.00054 |     | 0.02869 ± 0.00035 |     | 0.08331 ± 0.00111 |     | 0.01418 ± 0.00027 |     | 0.02674 ± 0.00036 |     |                          |  |  |  |
| Hg                            | 0.00003 ± 0.00008                        |     | 0.00009 ± 0.00033 |     | 0.00005 ± 0.00017 |     | 0.00030 ± 0.00054 |     | 0.00042 ± 0.00035 |     | 0.00101 ± 0.00111 |     | 0.00000 ± 0.00027 |     | 0.00114 ± 0.00036 |     |                          |  |  |  |
| Mn                            | 0.05099 ± 0.00023                        |     | 0.06702 ± 0.00066 |     | 0.06808 ± 0.00054 |     | 0.08508 ± 0.00108 |     | 0.06785 ± 0.00070 |     | 0.08602 ± 0.00223 |     | 0.06873 ± 0.00054 |     | 0.06937 ± 0.00072 |     |                          |  |  |  |
| Ni                            | 0.00379 ± 0.00016                        |     | 0.00500 ± 0.00066 |     | 0.00332 ± 0.00034 |     | 0.00455 ± 0.00108 |     | 0.00275 ± 0.00070 |     | 0.00351 ± 0.00223 |     | 0.00215 ± 0.00054 |     | 0.00237 ± 0.00072 |     |                          |  |  |  |
| Pb                            | 0.00173 ± 0.00004                        |     | 0.00194 ± 0.00017 |     | 0.00206 ± 0.00008 |     | 0.00846 ± 0.00027 |     | 0.00230 ± 0.00018 |     | 0.00208 ± 0.00056 |     | 0.00105 ± 0.00014 |     | 0.00137 ± 0.00018 |     |                          |  |  |  |
| Sb                            | 0.00002 ± 0.00004                        |     | 0.00004 ± 0.00017 |     | 0.00013 ± 0.00008 |     | 0.00037 ± 0.00027 |     | 0.00018 ± 0.00018 |     | 0.00033 ± 0.00056 |     | 0.00059 ± 0.00014 |     | 0.00063 ± 0.00018 |     |                          |  |  |  |
| Sr                            | 0.13159 ± 0.00057                        |     | 0.14898 ± 0.00053 |     | 0.01515 ± 0.00008 |     | 0.01854 ± 0.00027 |     | 0.01321 ± 0.00018 |     | 0.01689 ± 0.00056 |     | 0.05076 ± 0.00017 |     | 0.02792 ± 0.00018 |     |                          |  |  |  |
| V                             | 0.00354 ± 0.00004                        |     | 0.00349 ± 0.00017 |     | 0.00532 ± 0.00008 |     | 0.00744 ± 0.00027 |     | 0.00466 ± 0.00023 |     | 0.00462 ± 0.00056 |     | 0.00685 ± 0.00014 |     | 0.00603 ± 0.00018 |     |                          |  |  |  |
| Zn                            | 0.02238 ± 0.00016                        |     | 0.02870 ± 0.00066 |     | 0.00940 ± 0.00034 |     | 0.01630 ± 0.00108 |     | 0.01041 ± 0.00070 |     | 0.01756 ± 0.00223 |     | 0.00953 ± 0.00054 |     | 0.01065 ± 0.00072 |     |                          |  |  |  |
| <b>Ions</b>                   |                                          |     |                   |     |                   |     |                   |     |                   |     |                   |     |                   |     |                   |     |                          |  |  |  |
| CL <sup>-</sup>               | 1.190 ± 0.060                            |     | 1.477 ± 0.075     |     | 0.200 ± 0.011     |     | 0.297 ± 0.017     |     | 0.507 ± 0.027     |     | 0.600 ± 0.034     |     | 0.518 ± 0.027     |     | 0.520 ± 0.027     |     |                          |  |  |  |
| NO <sub>3</sub> <sup>-</sup>  | 0.022 ± 0.002                            |     | 0.071 ± 0.009     |     | 0.030 ± 0.004     |     | 0.061 ± 0.010     |     | 0.106 ± 0.010     |     | 0.199 ± 0.025     |     | 0.081 ± 0.008     |     | 0.132 ± 0.011     |     |                          |  |  |  |
| PO <sub>4</sub> <sup>3-</sup> | 1.671 ± 0.085                            |     | 6.252 ± 0.320     |     | 0.000 ± 0.003     |     | 0.088 ± 0.013     |     | 0.075 ± 0.009     |     | 0.000 ± 0.019     |     | 0.039 ± 0.007     |     | 0.000 ± 0.006     |     |                          |  |  |  |
| SO <sub>4</sub> <sup>2-</sup> | 1.115 ± 0.057                            |     | 1.780 ± 0.095     |     | 0.164 ± 0.011     |     | 0.282 ± 0.021     |     | 0.141 ± 0.012     |     | 0.188 ± 0.025     |     | 0.551 ± 0.032     |     | 0.802 ± 0.045     |     |                          |  |  |  |
| NH <sub>4</sub> <sup>+</sup>  | 0.031 ± 0.002                            |     | 0.051 ± 0.004     |     | 0.019 ± 0.001     |     | 0.037 ± 0.003     |     | 0.036 ± 0.003     |     | 0.085 ± 0.007     |     | 0.000 ± 0.001     |     | 0.012 ± 0.001     |     |                          |  |  |  |
| Ca <sup>2+</sup>              | 2.042 ± 0.084                            |     | 6.792 ± 0.222     |     | 3.888 ± 0.036     |     | 3.928 ± 0.107     |     | 2.227 ± 0.071     |     | 2.338 ± 0.232     |     | 3.463 ± 0.065     |     | 2.333 ± 0.102     |     |                          |  |  |  |
| K <sup>+</sup>                | 0.228 ± 0.020                            |     | 0.381 ± 0.088     |     | 0.098 ± 0.036     |     | 0.223 ± 0.107     |     | 0.145 ± 0.071     |     | 0.220 ± 0.232     |     | 0.791 ± 0.062     |     | 1.279 ± 0.069     |     |                          |  |  |  |
| Mg <sup>2+</sup>              | 0.543 ± 0.020                            |     | 0.991 ± 0.088     |     | 0.157 ± 0.036     |     | 0.281 ± 0.107     |     | 0.295 ± 0.071     |     | 0.377 ± 0.232     |     | 0.325 ± 0.062     |     | 0.340 ± 0.069     |     |                          |  |  |  |
| Na <sup>+</sup>               | 0.931 ± 0.020                            |     | 1.331 ± 0.088     |     | 0.259 ± 0.036     |     | 0.399 ± 0.107     |     | 0.367 ± 0.071     |     | 0.364 ± 0.232     |     | 1.979 ± 0.062     |     | 2.360 ± 0.069     |     |                          |  |  |  |

Supplement S4.1 - Chemical Concentrations (mass %) of Grab Soil Samples Re-suspended onto Filters, for PM<sub>10</sub> and PM<sub>2.5</sub> Fractions

| Sample #                      | S1018                    |     |                   |     | S1019              |     |                   |     | S1022                        |     |                    |     | S1023                       |     |                    |     |
|-------------------------------|--------------------------|-----|-------------------|-----|--------------------|-----|-------------------|-----|------------------------------|-----|--------------------|-----|-----------------------------|-----|--------------------|-----|
| Locality                      | China, Xinjiang Sample 2 |     |                   |     | USA, Owens Lake CA |     |                   |     | Namibia, Etosha, Fischer Pan |     |                    |     | Namibia, Etosha, Stinkwater |     |                    |     |
| Particle Size                 | PM <sub>10</sub>         |     | PM <sub>2.5</sub> |     | PM <sub>10</sub>   |     | PM <sub>2.5</sub> |     | PM <sub>10</sub>             |     | PM <sub>2.5</sub>  |     | PM <sub>10</sub>            |     | PM <sub>2.5</sub>  |     |
|                               | Conc                     | Unc | Conc              | Unc | Conc               | Unc | Conc              | Unc | Conc                         | Unc | Conc               | Unc | Conc                        | Unc | Conc               | Unc |
|                               | %                        | %   | %                 | %   | %                  | %   | %                 | %   | %                            | %   | %                  | %   | %                           | %   | %                  | %   |
| <b>Majors</b>                 |                          |     |                   |     |                    |     |                   |     |                              |     |                    |     |                             |     |                    |     |
| Si                            | 16.707 ± 0.042           |     | 18.592 ± 0.054    |     | 13.032 ± 0.030     |     | 17.571 ± 0.050    |     | 10.809 ± 0.027               |     | 14.302 ± 0.040     |     | 1.728 ± 0.010               |     | 2.833 ± 0.026      |     |
| Ti                            | 0.378 ± 0.005            |     | 0.373 ± 0.007     |     | 0.262 ± 0.003      |     | 0.246 ± 0.006     |     | 0.046 ± 0.002                |     | 0.051 ± 0.003      |     | 0.020 ± 0.001               |     | 0.017 ± 0.004      |     |
| Al                            | 4.912 ± 0.034            |     | 5.607 ± 0.048     |     | 2.637 ± 0.022      |     | 3.452 ± 0.042     |     | 0.202 ± 0.018                |     | 0.177 ± 0.028      |     | 0.342 ± 0.012               |     | 0.650 ± 0.034      |     |
| Fe                            | 3.970 ± 0.009            |     | 3.997 ± 0.011     |     | 3.517 ± 0.007      |     | 3.968 ± 0.011     |     | 0.551 ± 0.002                |     | 0.669 ± 0.003      |     | 0.187 ± 0.001               |     | 0.265 ± 0.003      |     |
| Mg                            | 0.066 ± 0.010            |     | 0.184 ± 0.014     |     | 1.639 ± 0.008      |     | 3.421 ± 0.018     |     | 5.745 ± 0.014                |     | 8.673 ± 0.022      |     | 0.789 ± 0.006               |     | 1.227 ± 0.018      |     |
| Ca                            | 0.519 ± 0.003            |     | 0.416 ± 0.004     |     | 6.580 ± 0.012      |     | 3.225 ± 0.009     |     | 6.142 ± 0.012                |     | 5.487 ± 0.012      |     | 2.569 ± 0.005               |     | 2.225 ± 0.009      |     |
| K                             | 2.379 ± 0.007            |     | 2.525 ± 0.009     |     | 2.762 ± 0.007      |     | 3.336 ± 0.010     |     | 0.501 ± 0.003                |     | 0.546 ± 0.004      |     | 0.492 ± 0.002               |     | 0.639 ± 0.006      |     |
| <b>Traces</b>                 |                          |     |                   |     |                    |     |                   |     |                              |     |                    |     |                             |     |                    |     |
| As                            | 0.00811 ± 0.00057        |     | 0.00171 ± 0.00101 |     | 0.00447 ± 0.00021  |     | 0.00629 ± 0.00089 |     | 0.00519 ± 0.00042            |     | 0.00735 ± 0.00069  |     | 0.00303 ± 0.00032           |     | 0.01247 ± 0.00143  |     |
| Be                            | 0.00013 ± 0.00014        |     | 0.00018 ± 0.00025 |     | 0.00009 ± 0.00005  |     | 0.00013 ± 0.00022 |     | 0.00003 ± 0.00009            |     | 0.00004 ± 0.00017  |     | 0.00001 ± 0.00008           |     | 0.00001 ± 0.00036  |     |
| Cd                            | 0.00000 ± 0.00014        |     | 0.00000 ± 0.00025 |     | 0.00003 ± 0.00005  |     | 0.00002 ± 0.00022 |     | 0.00001 ± 0.00009            |     | 0.00001 ± 0.00017  |     | 0.00000 ± 0.00008           |     | -0.00001 ± 0.00036 |     |
| Cr                            | 0.01524 ± 0.00029        |     | 0.03785 ± 0.00050 |     | 0.00706 ± 0.00011  |     | 0.02327 ± 0.00045 |     | 0.00719 ± 0.00018            |     | 0.00992 ± 0.00035  |     | 0.00519 ± 0.00016           |     | 0.02691 ± 0.00071  |     |
| Hg                            | 0.00000 ± 0.00029        |     | 0.00006 ± 0.00050 |     | 0.00007 ± 0.00011  |     | 0.00019 ± 0.00045 |     | 0.00000 ± 0.00018            |     | -0.00002 ± 0.00035 |     | 0.00006 ± 0.00016           |     | -0.00001 ± 0.00071 |     |
| Mn                            | 0.03405 ± 0.00057        |     | 0.03913 ± 0.00101 |     | 0.05881 ± 0.00040  |     | 0.07501 ± 0.00089 |     | 0.01189 ± 0.00036            |     | 0.01384 ± 0.00069  |     | 0.00515 ± 0.00032           |     | 0.00643 ± 0.00143  |     |
| Ni                            | 0.00282 ± 0.00057        |     | 0.00248 ± 0.00101 |     | 0.00163 ± 0.00021  |     | 0.00236 ± 0.00089 |     | 0.00103 ± 0.00036            |     | 0.00134 ± 0.00069  |     | 0.00071 ± 0.00032           |     | 0.00128 ± 0.00143  |     |
| Pb                            | 0.00260 ± 0.00014        |     | 0.00306 ± 0.00025 |     | 0.00112 ± 0.00005  |     | 0.00131 ± 0.00022 |     | 0.00082 ± 0.00009            |     | 0.00082 ± 0.00017  |     | 0.00040 ± 0.00008           |     | 0.00042 ± 0.00036  |     |
| Sb                            | 0.00021 ± 0.00014        |     | 0.00026 ± 0.00025 |     | 0.00051 ± 0.00005  |     | 0.00069 ± 0.00022 |     | 0.00014 ± 0.00009            |     | 0.00010 ± 0.00017  |     | 0.00004 ± 0.00008           |     | 0.00021 ± 0.00036  |     |
| Sr                            | 0.01578 ± 0.00014        |     | 0.02115 ± 0.00025 |     | 0.05371 ± 0.00010  |     | 0.03071 ± 0.00095 |     | 0.15095 ± 0.00061            |     | 0.13643 ± 0.00030  |     | 0.14974 ± 0.00082           |     | 0.09670 ± 0.00036  |     |
| V                             | 0.00402 ± 0.00014        |     | 0.00357 ± 0.00036 |     | 0.00654 ± 0.00006  |     | 0.00771 ± 0.00022 |     | 0.00737 ± 0.00009            |     | 0.00820 ± 0.00017  |     | 0.00237 ± 0.00008           |     | 0.00259 ± 0.00036  |     |
| Zn                            | 0.01055 ± 0.00057        |     | 0.01088 ± 0.00101 |     | 0.00664 ± 0.00021  |     | 0.01812 ± 0.00089 |     | 0.01076 ± 0.00036            |     | 0.01155 ± 0.00069  |     | 0.00254 ± 0.00032           |     | 0.00545 ± 0.00143  |     |
| <b>Ions</b>                   |                          |     |                   |     |                    |     |                   |     |                              |     |                    |     |                             |     |                    |     |
| CL <sup>-</sup>               | 1.067 ± 0.054            |     | 0.349 ± 0.019     |     | 0.732 ± 0.037      |     | 1.496 ± 0.077     |     | 2.842 ± 0.143                |     | 1.718 ± 0.087      |     | 2.398 ± 0.123               |     | 1.486 ± 0.077      |     |
| NO <sub>3</sub> <sup>-</sup>  | 0.585 ± 0.033            |     | 0.941 ± 0.053     |     | 0.082 ± 0.006      |     | 0.132 ± 0.013     |     | 0.043 ± 0.004                |     | 0.061 ± 0.007      |     | 0.541 ± 0.038               |     | 0.452 ± 0.031      |     |
| PO <sub>4</sub> <sup>3-</sup> | 0.098 ± 0.010            |     | 0.000 ± 0.008     |     | 0.038 ± 0.004      |     | 0.121 ± 0.014     |     | 0.015 ± 0.003                |     | 0.023 ± 0.006      |     | 0.000 ± 0.013               |     | 0.000 ± 0.011      |     |
| SO <sub>4</sub> <sup>2-</sup> | 1.124 ± 0.060            |     | 1.264 ± 0.070     |     | 0.698 ± 0.037      |     | 0.840 ± 0.049     |     | 1.500 ± 0.077                |     | 1.242 ± 0.066      |     | 47.268 ± 2.375              |     | 37.445 ± 1.882     |     |
| NH <sub>4</sub> <sup>+</sup>  | 0.318 ± 0.017            |     | 0.068 ± 0.005     |     | 0.004 ± 0.001      |     | 0.020 ± 0.002     |     | 0.006 ± 0.001                |     | 0.015 ± 0.002      |     | 0.000 ± 0.002               |     | 0.000 ± 0.002      |     |
| Ca <sup>2+</sup>              | 0.252 ± 0.063            |     | 0.343 ± 0.095     |     | 5.114 ± 0.197      |     | 2.806 ± 0.253     |     | 6.356 ± 0.057                |     | 5.367 ± 0.066      |     | 4.482 ± 0.163               |     | 2.444 ± 0.136      |     |
| K <sup>+</sup>                | 0.190 ± 0.063            |     | 0.175 ± 0.095     |     | 0.908 ± 0.027      |     | 1.321 ± 0.100     |     | 0.121 ± 0.031                |     | 0.150 ± 0.065      |     | 0.289 ± 0.163               |     | 0.226 ± 0.136      |     |
| Mg <sup>2+</sup>              | 0.269 ± 0.063            |     | 0.336 ± 0.095     |     | 0.133 ± 0.027      |     | 0.539 ± 0.100     |     | 2.203 ± 0.031                |     | 3.396 ± 0.065      |     | 2.040 ± 0.163               |     | 1.260 ± 0.136      |     |
| Na <sup>+</sup>               | 0.903 ± 0.063            |     | 1.205 ± 0.095     |     | 2.544 ± 0.028      |     | 2.683 ± 0.100     |     | 3.263 ± 0.031                |     | 2.383 ± 0.081      |     | 28.576 ± 0.934              |     | 22.155 ± 1.063     |     |



Supplement S4.1 - Chemical Concentrations (mass %) of Grab Soil Samples Re-suspended onto Filters, for PM<sub>10</sub> and PM<sub>2.5</sub> Fractions

| Sample #                      | S1024                    |     |                   |     | S1025               |     |                   |     | S1027                       |     |                   |     | S1033                               |     |                   |     |
|-------------------------------|--------------------------|-----|-------------------|-----|---------------------|-----|-------------------|-----|-----------------------------|-----|-------------------|-----|-------------------------------------|-----|-------------------|-----|
|                               | Namibia, Etosha, Lookout |     |                   |     | Morocco, Lake Iriki |     |                   |     | Spain, Gran Canaria, Galdar |     |                   |     | Fuerteventura, Pozo Negro, Sample 1 |     |                   |     |
|                               | PM <sub>10</sub>         |     | PM <sub>2.5</sub> |     | PM <sub>10</sub>    |     | PM <sub>2.5</sub> |     | PM <sub>10</sub>            |     | PM <sub>2.5</sub> |     | PM <sub>10</sub>                    |     | PM <sub>2.5</sub> |     |
|                               | Conc                     | Unc | Conc              | Unc | Conc                | Unc | Conc              | Unc | Conc                        | Unc | Conc              | Unc | Conc                                | Unc | Conc              | Unc |
| %                             | %                        | %   | %                 | %   | %                   | %   | %                 | %   | %                           | %   | %                 | %   | %                                   | %   | %                 |     |
| <b>Majors</b>                 |                          |     |                   |     |                     |     |                   |     |                             |     |                   |     |                                     |     |                   |     |
| Si                            | 3.098 ± 0.012            |     | 4.638 ± 0.030     |     | 14.172 ± 0.033      |     | 15.156 ± 0.049    |     | 18.159 ± 0.045              |     | 17.560 ± 0.050    |     | 11.491 ± 0.028                      |     | 13.885 ± 0.050    |     |
| Ti                            | 0.027 ± 0.001            |     | 0.028 ± 0.004     |     | 0.459 ± 0.005       |     | 0.412 ± 0.008     |     | 0.936 ± 0.008               |     | 0.823 ± 0.009     |     | 0.471 ± 0.004                       |     | 0.451 ± 0.009     |     |
| Al                            | 0.531 ± 0.013            |     | 0.730 ± 0.036     |     | 6.141 ± 0.029       |     | 7.228 ± 0.054     |     | 5.969 ± 0.038               |     | 6.250 ± 0.047     |     | 4.442 ± 0.024                       |     | 5.992 ± 0.053     |     |
| Fe                            | 0.443 ± 0.002            |     | 0.589 ± 0.005     |     | 4.928 ± 0.010       |     | 4.860 ± 0.013     |     | 5.299 ± 0.011               |     | 4.856 ± 0.012     |     | 4.331 ± 0.008                       |     | 4.464 ± 0.013     |     |
| Mg                            | 1.296 ± 0.007            |     | 2.375 ± 0.019     |     | 0.457 ± 0.008       |     | 0.739 ± 0.016     |     | 0.262 ± 0.009               |     | 0.380 ± 0.013     |     | 0.823 ± 0.007                       |     | 1.482 ± 0.017     |     |
| Ca                            | 4.860 ± 0.009            |     | 3.189 ± 0.010     |     | 4.772 ± 0.010       |     | 3.057 ± 0.009     |     | 0.645 ± 0.003               |     | 0.595 ± 0.004     |     | 3.088 ± 0.007                       |     | 3.258 ± 0.010     |     |
| K                             | 0.472 ± 0.002            |     | 0.493 ± 0.006     |     | 2.664 ± 0.007       |     | 2.671 ± 0.010     |     | 2.531 ± 0.007               |     | 2.374 ± 0.008     |     | 2.051 ± 0.005                       |     | 2.322 ± 0.010     |     |
| <b>Traces</b>                 |                          |     |                   |     |                     |     |                   |     |                             |     |                   |     |                                     |     |                   |     |
| As                            | 0.00031 ± 0.00023        |     | 0.00075 ± 0.00133 |     | 0.00119 ± 0.00034   |     | 0.00123 ± 0.00106 |     | 0.00528 ± 0.00058           |     | 0.00016 ± 0.00089 |     | 0.00031 ± 0.00031                   |     | 0.00022 ± 0.00122 |     |
| Be                            | 0.00002 ± 0.00006        |     | 0.00004 ± 0.00033 |     | 0.00015 ± 0.00009   |     | 0.00021 ± 0.00027 |     | 0.00026 ± 0.00014           |     | 0.00033 ± 0.00022 |     | 0.00015 ± 0.00008                   |     | 0.00020 ± 0.00030 |     |
| Cd                            | 0.00002 ± 0.00006        |     | 0.00001 ± 0.00033 |     | 0.00002 ± 0.00009   |     | 0.00002 ± 0.00027 |     | 0.00002 ± 0.00014           |     | 0.00002 ± 0.00022 |     | 0.00009 ± 0.00008                   |     | 0.00011 ± 0.00030 |     |
| Cr                            | 0.00605 ± 0.00011        |     | 0.01141 ± 0.00066 |     | 0.01600 ± 0.00017   |     | 0.02863 ± 0.00053 |     | 0.01385 ± 0.00029           |     | 0.03831 ± 0.00044 |     | 0.01496 ± 0.00016                   |     | 0.05442 ± 0.00061 |     |
| Hg                            | 0.00003 ± 0.00011        |     | 0.00020 ± 0.00066 |     | 0.00007 ± 0.00017   |     | 0.00006 ± 0.00053 |     | 0.00012 ± 0.00029           |     | 0.00010 ± 0.00044 |     | 0.00010 ± 0.00016                   |     | 0.00006 ± 0.00061 |     |
| Mn                            | 0.00611 ± 0.00023        |     | 0.00725 ± 0.00133 |     | 0.06818 ± 0.00034   |     | 0.08851 ± 0.00106 |     | 0.21091 ± 0.00058           |     | 0.18788 ± 0.00089 |     | 0.07137 ± 0.00031                   |     | 0.10775 ± 0.00122 |     |
| Ni                            | 0.00043 ± 0.00023        |     | 0.00071 ± 0.00133 |     | 0.00300 ± 0.00034   |     | 0.00397 ± 0.00106 |     | 0.00593 ± 0.00058           |     | 0.00639 ± 0.00089 |     | 0.00422 ± 0.00031                   |     | 0.00606 ± 0.00122 |     |
| Pb                            | 0.00038 ± 0.00006        |     | 0.00048 ± 0.00033 |     | 0.00217 ± 0.00009   |     | 0.00301 ± 0.00027 |     | 0.00156 ± 0.00014           |     | 0.00186 ± 0.00022 |     | 0.00119 ± 0.00008                   |     | 0.00157 ± 0.00030 |     |
| Sb                            | 0.00002 ± 0.00006        |     | 0.00004 ± 0.00033 |     | 0.00009 ± 0.00009   |     | 0.00015 ± 0.00027 |     | 0.00011 ± 0.00014           |     | 0.00015 ± 0.00022 |     | 0.00005 ± 0.00008                   |     | 0.00013 ± 0.00030 |     |
| Sr                            | 0.09180 ± 0.00069        |     | 0.06735 ± 0.00045 |     | 0.01137 ± 0.00018   |     | 0.01373 ± 0.00027 |     | 0.00412 ± 0.00014           |     | 0.00649 ± 0.00022 |     | 0.01102 ± 0.00008                   |     | 0.01457 ± 0.00030 |     |
| V                             | 0.00133 ± 0.00006        |     | 0.00148 ± 0.00033 |     | 0.00507 ± 0.00009   |     | 0.00772 ± 0.00039 |     | 0.00550 ± 0.00014           |     | 0.00482 ± 0.00022 |     | 0.00344 ± 0.00008                   |     | 0.00353 ± 0.00030 |     |
| Zn                            | 0.00211 ± 0.00023        |     | 0.00573 ± 0.00133 |     | 0.00811 ± 0.00034   |     | 0.12645 ± 0.00106 |     | 0.00579 ± 0.00058           |     | 0.01161 ± 0.00089 |     | 0.00834 ± 0.00031                   |     | 0.02622 ± 0.00122 |     |
| <b>Ions</b>                   |                          |     |                   |     |                     |     |                   |     |                             |     |                   |     |                                     |     |                   |     |
| CL <sup>-</sup>               | 1.667 ± 0.084            |     | 1.604 ± 0.083     |     | 0.253 ± 0.013       |     | 0.326 ± 0.018     |     | 0.110 ± 0.007               |     | 0.088 ± 0.006     |     | 0.079 ± 0.005                       |     | 0.120 ± 0.009     |     |
| NO <sub>3</sub> <sup>-</sup>  | 0.071 ± 0.006            |     | 0.212 ± 0.021     |     | 0.028 ± 0.004       |     | 0.065 ± 0.010     |     | 0.126 ± 0.010               |     | 0.074 ± 0.010     |     | 0.039 ± 0.004                       |     | 0.075 ± 0.014     |     |
| PO <sub>4</sub> <sup>3-</sup> | 0.022 ± 0.004            |     | 0.085 ± 0.017     |     | 0.145 ± 0.010       |     | 0.104 ± 0.014     |     | 0.000 ± 0.005               |     | 0.044 ± 0.011     |     | 0.147 ± 0.010                       |     | 0.581 ± 0.041     |     |
| SO <sub>4</sub> <sup>2-</sup> | 37.047 ± 1.855           |     | 41.492 ± 2.085    |     | 0.141 ± 0.010       |     | 0.000 ± 0.008     |     | 0.089 ± 0.009               |     | 0.179 ± 0.016     |     | 0.073 ± 0.006                       |     | 0.201 ± 0.020     |     |
| NH <sub>4</sub> <sup>+</sup>  | 0.004 ± 0.001            |     | 0.028 ± 0.003     |     | 0.029 ± 0.002       |     | 0.052 ± 0.004     |     | 0.101 ± 0.006               |     | 0.143 ± 0.008     |     | 0.021 ± 0.001                       |     | 0.047 ± 0.004     |     |
| Ca <sup>2+</sup>              | 5.208 ± 0.191            |     | 4.239 ± 0.212     |     | 5.234 ± 0.078       |     | 3.070 ± 0.111     |     | 0.381 ± 0.061               |     | 0.426 ± 0.104     |     | 2.725 ± 0.151                       |     | 3.706 ± 0.242     |     |
| K <sup>+</sup>                | 0.126 ± 0.035            |     | 0.155 ± 0.157     |     | 0.252 ± 0.038       |     | 0.316 ± 0.111     |     | 0.371 ± 0.061               |     | 0.296 ± 0.104     |     | 0.275 ± 0.035                       |     | 0.400 ± 0.151     |     |
| Mg <sup>2+</sup>              | 2.058 ± 0.070            |     | 2.184 ± 0.157     |     | 0.626 ± 0.038       |     | 0.477 ± 0.111     |     | 0.318 ± 0.061               |     | 0.300 ± 0.104     |     | 0.339 ± 0.035                       |     | 0.720 ± 0.151     |     |
| Na <sup>+</sup>               | 18.809 ± 0.051           |     | 21.085 ± 0.256    |     | 0.248 ± 0.038       |     | 0.296 ± 0.111     |     | 0.080 ± 0.061               |     | 0.112 ± 0.104     |     | 0.127 ± 0.035                       |     | 0.118 ± 0.151     |     |

Supplement S4.1 - Chemical Concentrations (mass %) of Grab Soil Samples Re-suspended onto Filters, for PM<sub>10</sub> and PM<sub>2.5</sub> Fractions

| Sample #                      | S1034                               |     |                   |     | S1035                              |     |                   |     | S1038                          |     |                   |     | S1039                          |     |                   |     |
|-------------------------------|-------------------------------------|-----|-------------------|-----|------------------------------------|-----|-------------------|-----|--------------------------------|-----|-------------------|-----|--------------------------------|-----|-------------------|-----|
| Locality                      | Fuerteventura, Pozo Negro, Sample 2 |     |                   |     | Spain, Fuerteventura, La Ampuyenta |     |                   |     | Botswana, Makgadikgadi, Mopipi |     |                   |     | Botswana, Makgadikgadi, Rakops |     |                   |     |
| Particle Size                 | PM <sub>10</sub>                    |     | PM <sub>2.5</sub> |     | PM <sub>10</sub>                   |     | PM <sub>2.5</sub> |     | PM <sub>10</sub>               |     | PM <sub>2.5</sub> |     | PM <sub>10</sub>               |     | PM <sub>2.5</sub> |     |
|                               | Conc                                | Unc | Conc              | Unc | Conc                               | Unc | Conc              | Unc | Conc                           | Unc | Conc              | Unc | Conc                           | Unc | Conc              | Unc |
|                               | %                                   | %   | %                 | %   | %                                  | %   | %                 | %   | %                              | %   | %                 | %   | %                              | %   | %                 | %   |
| <b>Majors</b>                 |                                     |     |                   |     |                                    |     |                   |     |                                |     |                   |     |                                |     |                   |     |
| Si                            | 13.208 ± 0.032                      |     | 15.467 ± 0.058    |     | 11.033 ± 0.028                     |     | 16.653 ± 0.057    |     | 11.739 ± 0.027                 |     | 17.066 ± 0.038    |     | 8.251 ± 0.021                  |     | 11.805 ± 0.031    |     |
| Ti                            | 0.704 ± 0.006                       |     | 0.668 ± 0.011     |     | 0.396 ± 0.004                      |     | 0.519 ± 0.010     |     | 0.119 ± 0.002                  |     | 0.133 ± 0.003     |     | 0.036 ± 0.002                  |     | 0.043 ± 0.003     |     |
| Al                            | 5.257 ± 0.027                       |     | 6.820 ± 0.064     |     | 4.619 ± 0.026                      |     | 7.327 ± 0.061     |     | 1.511 ± 0.015                  |     | 2.373 ± 0.022     |     | 0.677 ± 0.017                  |     | 0.881 ± 0.022     |     |
| Fe                            | 5.327 ± 0.010                       |     | 5.466 ± 0.016     |     | 3.870 ± 0.008                      |     | 5.032 ± 0.014     |     | 1.988 ± 0.004                  |     | 2.291 ± 0.005     |     | 0.991 ± 0.003                  |     | 1.192 ± 0.004     |     |
| Mg                            | 0.320 ± 0.007                       |     | 0.641 ± 0.019     |     | 0.000 ± 0.007                      |     | 0.071 ± 0.017     |     | 0.552 ± 0.004                  |     | 1.252 ± 0.008     |     | 1.787 ± 0.005                  |     | 3.383 ± 0.011     |     |
| Ca                            | 1.277 ± 0.004                       |     | 1.183 ± 0.007     |     | 1.711 ± 0.004                      |     | 2.134 ± 0.009     |     | 8.062 ± 0.014                  |     | 7.081 ± 0.013     |     | 13.299 ± 0.023                 |     | 12.500 ± 0.023    |     |
| K                             | 2.094 ± 0.006                       |     | 2.302 ± 0.010     |     | 1.988 ± 0.005                      |     | 2.686 ± 0.011     |     | 1.449 ± 0.004                  |     | 1.810 ± 0.005     |     | 0.715 ± 0.004                  |     | 0.909 ± 0.004     |     |
| <b>Traces</b>                 |                                     |     |                   |     |                                    |     |                   |     |                                |     |                   |     |                                |     |                   |     |
| As                            | 0.00041 ± 0.00036                   |     | 0.00019 ± 0.00157 |     | 0.00454 ± 0.00042                  |     | 0.01316 ± 0.00140 |     | 0.00014 ± 0.00009              |     | 0.00028 ± 0.00034 |     | 0.00125 ± 0.00014              |     | 0.00369 ± 0.00045 |     |
| Be                            | 0.00017 ± 0.00009                   |     | 0.00021 ± 0.00039 |     | 0.00020 ± 0.00009                  |     | 0.00024 ± 0.00035 |     | 0.00007 ± 0.00002              |     | 0.00008 ± 0.00008 |     | 0.00006 ± 0.00003              |     | 0.00007 ± 0.00011 |     |
| Cd                            | 0.00008 ± 0.00009                   |     | 0.00009 ± 0.00039 |     | 0.00002 ± 0.00009                  |     | 0.00001 ± 0.00035 |     | 0.00001 ± 0.00002              |     | 0.00001 ± 0.00008 |     | 0.00000 ± 0.00003              |     | 0.00000 ± 0.00011 |     |
| Cr                            | 0.01781 ± 0.00018                   |     | 0.05959 ± 0.00079 |     | 0.02490 ± 0.00022                  |     | 0.03586 ± 0.00070 |     | 0.00406 ± 0.00005              |     | 0.00998 ± 0.00017 |     | 0.00292 ± 0.00007              |     | 0.00618 ± 0.00022 |     |
| Hg                            | 0.00032 ± 0.00018                   |     | 0.00029 ± 0.00079 |     | 0.00000 ± 0.00019                  |     | 0.00011 ± 0.00070 |     | 0.00002 ± 0.00005              |     | 0.00006 ± 0.00017 |     | 0.00005 ± 0.00007              |     | 0.00004 ± 0.00022 |     |
| Mn                            | 0.07208 ± 0.00042                   |     | 0.09868 ± 0.00157 |     | 0.06527 ± 0.00038                  |     | 0.06874 ± 0.00140 |     | 0.02774 ± 0.00009              |     | 0.03917 ± 0.00045 |     | 0.03738 ± 0.00014              |     | 0.04182 ± 0.00045 |     |
| Ni                            | 0.00482 ± 0.00036                   |     | 0.00607 ± 0.00157 |     | 0.01128 ± 0.00038                  |     | 0.01271 ± 0.00140 |     | 0.00122 ± 0.00009              |     | 0.00176 ± 0.00034 |     | 0.00097 ± 0.00014              |     | 0.00124 ± 0.00045 |     |
| Pb                            | 0.00156 ± 0.00009                   |     | 0.00183 ± 0.00039 |     | 0.00117 ± 0.00009                  |     | 0.00128 ± 0.00035 |     | 0.00085 ± 0.00002              |     | 0.00094 ± 0.00008 |     | 0.00031 ± 0.00003              |     | 0.00034 ± 0.00011 |     |
| Sb                            | 0.00010 ± 0.00009                   |     | 0.00015 ± 0.00039 |     | 0.00013 ± 0.00009                  |     | 0.00149 ± 0.00035 |     | 0.00001 ± 0.00002              |     | 0.00002 ± 0.00008 |     | 0.00004 ± 0.00003              |     | 0.00005 ± 0.00011 |     |
| Sr                            | 0.00823 ± 0.00009                   |     | 0.00936 ± 0.00039 |     | 0.00751 ± 0.00009                  |     | 0.00831 ± 0.00035 |     | 0.03843 ± 0.00009              |     | 0.03614 ± 0.00014 |     | 0.13219 ± 0.00013              |     | 0.12057 ± 0.00052 |     |
| V                             | 0.00576 ± 0.00011                   |     | 0.00419 ± 0.00039 |     | 0.00751 ± 0.00009                  |     | 0.00759 ± 0.00035 |     | 0.00456 ± 0.00002              |     | 0.00498 ± 0.00008 |     | 0.00137 ± 0.00003              |     | 0.00151 ± 0.00011 |     |
| Zn                            | 0.00971 ± 0.00036                   |     | 0.01891 ± 0.00157 |     | 0.00521 ± 0.00038                  |     | 0.00957 ± 0.00140 |     | 0.00225 ± 0.00009              |     | 0.00403 ± 0.00034 |     | 0.00189 ± 0.00014              |     | 0.00413 ± 0.00045 |     |
| <b>Ions</b>                   |                                     |     |                   |     |                                    |     |                   |     |                                |     |                   |     |                                |     |                   |     |
| CL <sup>-</sup>               | 0.051 ± 0.003                       |     | 0.141 ± 0.011     |     | 0.158 ± 0.009                      |     | 0.401 ± 0.023     |     | 0.076 ± 0.004                  |     | 0.467 ± 0.024     |     | 0.201 ± 0.010                  |     | 0.455 ± 0.024     |     |
| NO <sub>3</sub> <sup>-</sup>  | 0.022 ± 0.004                       |     | 0.080 ± 0.017     |     | 0.049 ± 0.005                      |     | 0.199 ± 0.019     |     | 0.026 ± 0.002                  |     | 0.057 ± 0.006     |     | 0.069 ± 0.004                  |     | 0.128 ± 0.009     |     |
| PO <sub>4</sub> <sup>3-</sup> | 0.159 ± 0.011                       |     | 0.441 ± 0.039     |     | 0.019 ± 0.004                      |     | 0.057 ± 0.015     |     | 0.029 ± 0.003                  |     | 0.068 ± 0.007     |     | 0.020 ± 0.002                  |     | 0.044 ± 0.006     |     |
| SO <sub>4</sub> <sup>2-</sup> | 0.035 ± 0.005                       |     | 0.112 ± 0.020     |     | 0.194 ± 0.012                      |     | 0.353 ± 0.028     |     | 0.320 ± 0.017                  |     | 0.517 ± 0.029     |     | 0.186 ± 0.010                  |     | 0.320 ± 0.019     |     |
| NH <sub>4</sub> <sup>+</sup>  | 0.042 ± 0.003                       |     | 0.125 ± 0.009     |     | 0.048 ± 0.003                      |     | 0.151 ± 0.009     |     | 0.017 ± 0.001                  |     | 0.071 ± 0.004     |     | 0.000 ± 0.000                  |     | 0.000 ± 0.001     |     |
| Ca <sup>2+</sup>              | 0.893 ± 0.041                       |     | 1.243 ± 0.207     |     | 1.590 ± 0.040                      |     | 2.033 ± 0.146     |     | 4.633 ± 0.146                  |     | 11.040 ± 0.264    |     | 3.836 ± 0.107                  |     | 10.786 ± 0.156    |     |
| K <sup>+</sup>                | 0.147 ± 0.041                       |     | 0.261 ± 0.207     |     | 0.384 ± 0.040                      |     | 0.672 ± 0.146     |     | 0.315 ± 0.015                  |     | 0.458 ± 0.046     |     | 0.179 ± 0.016                  |     | 0.315 ± 0.046     |     |
| Mg <sup>2+</sup>              | 0.191 ± 0.041                       |     | 0.387 ± 0.207     |     | 0.257 ± 0.040                      |     | 0.415 ± 0.146     |     | 0.175 ± 0.015                  |     | 0.267 ± 0.046     |     | 0.109 ± 0.016                  |     | 0.436 ± 0.046     |     |
| Na <sup>+</sup>               | 0.048 ± 0.041                       |     | 0.000 ± 0.207     |     | 0.219 ± 0.040                      |     | 0.385 ± 0.146     |     | 0.189 ± 0.015                  |     | 0.346 ± 0.046     |     | 1.118 ± 0.030                  |     | 1.563 ± 0.046     |     |

Supplement S4.1 - Chemical Concentrations (mass %) of Grab Soil Samples Re-suspended onto Filters, for PM<sub>10</sub> and PM<sub>2.5</sub> Fractions

| Sample #                      | S1040                              |     |                   |     | S1041              |     |                   |     | S1042                       |     |                   |     | S1045                     |     |                   |     |
|-------------------------------|------------------------------------|-----|-------------------|-----|--------------------|-----|-------------------|-----|-----------------------------|-----|-------------------|-----|---------------------------|-----|-------------------|-----|
| Locality                      | Botswana, Nxai Pan, Baines Baobabs |     |                   |     | Botswana, Nxai Pan |     |                   |     | Chile, Atacama, Rock Garden |     |                   |     | USA, Black Rock playa, NV |     |                   |     |
| Particle Size                 | PM <sub>10</sub>                   |     | PM <sub>2.5</sub> |     | PM <sub>10</sub>   |     | PM <sub>2.5</sub> |     | PM <sub>10</sub>            |     | PM <sub>2.5</sub> |     | PM <sub>10</sub>          |     | PM <sub>2.5</sub> |     |
|                               | Conc                               | Unc | Conc              | Unc | Conc               | Unc | Conc              | Unc | Conc                        | Unc | Conc              | Unc | Conc                      | Unc | Conc              | Unc |
|                               | %                                  | %   | %                 | %   | %                  | %   | %                 | %   | %                           | %   | %                 | %   | %                         | %   | %                 | %   |
| <b>Majors</b>                 |                                    |     |                   |     |                    |     |                   |     |                             |     |                   |     |                           |     |                   |     |
| Si                            | 7.831 ± 0.018                      |     | 12.789 ± 0.037    |     | 14.400 ± 0.043     |     | 18.741 ± 0.052    |     | 14.858 ± 0.037              |     | 16.578 ± 0.044    |     | 14.110 ± 0.033            |     | 16.332 ± 0.042    |     |
| Ti                            | 0.081 ± 0.001                      |     | 0.093 ± 0.003     |     | 0.059 ± 0.004      |     | 0.051 ± 0.004     |     | 0.271 ± 0.004               |     | 0.265 ± 0.005     |     | 0.255 ± 0.003             |     | 0.259 ± 0.005     |     |
| Al                            | 0.773 ± 0.010                      |     | 1.533 ± 0.028     |     | 0.205 ± 0.030      |     | 0.346 ± 0.034     |     | 5.275 ± 0.031               |     | 6.513 ± 0.041     |     | 3.991 ± 0.024             |     | 4.664 ± 0.035     |     |
| Fe                            | 0.774 ± 0.002                      |     | 0.908 ± 0.004     |     | 0.694 ± 0.004      |     | 0.799 ± 0.004     |     | 3.826 ± 0.008               |     | 4.291 ± 0.010     |     | 3.654 ± 0.008             |     | 3.820 ± 0.010     |     |
| Mg                            | 0.704 ± 0.005                      |     | 1.627 ± 0.012     |     | 5.621 ± 0.018      |     | 7.894 ± 0.023     |     | 0.562 ± 0.009               |     | 0.989 ± 0.013     |     | 0.439 ± 0.008             |     | 0.684 ± 0.011     |     |
| Ca                            | 1.417 ± 0.003                      |     | 1.220 ± 0.005     |     | 2.076 ± 0.007      |     | 2.748 ± 0.008     |     | 3.745 ± 0.008               |     | 3.120 ± 0.008     |     | 3.652 ± 0.008             |     | 3.600 ± 0.009     |     |
| K                             | 2.119 ± 0.005                      |     | 3.250 ± 0.009     |     | 0.730 ± 0.005      |     | 1.007 ± 0.006     |     | 1.912 ± 0.006               |     | 2.193 ± 0.007     |     | 2.175 ± 0.006             |     | 2.350 ± 0.007     |     |
| <b>Traces</b>                 |                                    |     |                   |     |                    |     |                   |     |                             |     |                   |     |                           |     |                   |     |
| As                            | 0.00016 ± 0.00015                  |     | 0.00031 ± 0.00068 |     | 0.00252 ± 0.00134  |     | 0.00754 ± 0.00090 |     | 0.00448 ± 0.00044           |     | 0.00494 ± 0.00064 |     | 0.00641 ± 0.00033         |     | 0.00951 ± 0.00061 |     |
| Be                            | 0.00002 ± 0.00004                  |     | 0.00003 ± 0.00017 |     | 0.00002 ± 0.00023  |     | 0.00003 ± 0.00022 |     | 0.00013 ± 0.00011           |     | 0.00016 ± 0.00016 |     | 0.00015 ± 0.00008         |     | 0.00017 ± 0.00015 |     |
| Cd                            | 0.00000 ± 0.00004                  |     | 0.00001 ± 0.00017 |     | -0.00001 ± 0.00023 |     | 0.00001 ± 0.00022 |     | 0.00011 ± 0.00011           |     | 0.00013 ± 0.00016 |     | 0.00008 ± 0.00008         |     | 0.00007 ± 0.00015 |     |
| Cr                            | 0.00445 ± 0.00008                  |     | 0.01652 ± 0.00034 |     | 0.02997 ± 0.00046  |     | 0.01437 ± 0.00045 |     | 0.01058 ± 0.00022           |     | 0.01441 ± 0.00032 |     | 0.01365 ± 0.00017         |     | 0.01543 ± 0.00031 |     |
| Hg                            | 0.00006 ± 0.00008                  |     | 0.00009 ± 0.00034 |     | 0.00007 ± 0.00046  |     | 0.00001 ± 0.00045 |     | 0.00005 ± 0.00022           |     | 0.00006 ± 0.00032 |     | 0.00012 ± 0.00017         |     | 0.00006 ± 0.00031 |     |
| Mn                            | 0.01858 ± 0.00020                  |     | 0.02408 ± 0.00068 |     | 0.03065 ± 0.00093  |     | 0.04137 ± 0.00090 |     | 0.05553 ± 0.00044           |     | 0.06383 ± 0.00064 |     | 0.05551 ± 0.00033         |     | 0.05987 ± 0.00061 |     |
| Ni                            | 0.00063 ± 0.00015                  |     | 0.00103 ± 0.00068 |     | 0.00134 ± 0.00093  |     | 0.00201 ± 0.00090 |     | 0.00238 ± 0.00044           |     | 0.00281 ± 0.00064 |     | 0.00610 ± 0.00033         |     | 0.00468 ± 0.00061 |     |
| Pb                            | 0.00025 ± 0.00004                  |     | 0.00036 ± 0.00017 |     | 0.00032 ± 0.00023  |     | 0.00042 ± 0.00022 |     | 0.00387 ± 0.00011           |     | 0.00429 ± 0.00016 |     | 0.00131 ± 0.00008         |     | 0.00230 ± 0.00015 |     |
| Sb                            | 0.00001 ± 0.00004                  |     | 0.00002 ± 0.00017 |     | 0.00001 ± 0.00023  |     | 0.00009 ± 0.00022 |     | 0.00035 ± 0.00011           |     | 0.00041 ± 0.00016 |     | 0.00032 ± 0.00008         |     | 0.00036 ± 0.00015 |     |
| Sr                            | 0.01876 ± 0.00024                  |     | 0.01248 ± 0.00017 |     | 0.02548 ± 0.00023  |     | 0.02612 ± 0.00022 |     | 0.02845 ± 0.00064           |     | 0.02560 ± 0.00080 |     | 0.02525 ± 0.00008         |     | 0.02592 ± 0.00015 |     |
| V                             | 0.00162 ± 0.00004                  |     | 0.00188 ± 0.00017 |     | 0.00266 ± 0.00023  |     | 0.00315 ± 0.00022 |     | 0.00630 ± 0.00011           |     | 0.00727 ± 0.00016 |     | 0.00578 ± 0.00008         |     | 0.00624 ± 0.00015 |     |
| Zn                            | 0.00169 ± 0.00015                  |     | 0.00618 ± 0.00068 |     | 0.00219 ± 0.00093  |     | 0.00991 ± 0.00090 |     | 0.01286 ± 0.00044           |     | 0.01734 ± 0.00064 |     | 0.01013 ± 0.00033         |     | 0.01164 ± 0.00061 |     |
| <b>Ions</b>                   |                                    |     |                   |     |                    |     |                   |     |                             |     |                   |     |                           |     |                   |     |
| Cl <sup>-</sup>               | 2.434 ± 0.122                      |     | 1.714 ± 0.087     |     | 0.065 ± 0.005      |     | 0.180 ± 0.011     |     | 0.136 ± 0.007               |     | 0.392 ± 0.021     |     | 0.887 ± 0.045             |     | 0.608 ± 0.031     |     |
| NO <sub>3</sub> <sup>-</sup>  | 0.112 ± 0.007                      |     | 0.182 ± 0.014     |     | 0.034 ± 0.007      |     | 0.083 ± 0.010     |     | 0.081 ± 0.006               |     | 0.112 ± 0.010     |     | 0.068 ± 0.006             |     | 0.074 ± 0.008     |     |
| PO <sub>4</sub> <sup>3-</sup> | 0.000 ± 0.002                      |     | 0.000 ± 0.006     |     | 0.000 ± 0.007      |     | 0.000 ± 0.008     |     | 0.121 ± 0.008               |     | 0.185 ± 0.015     |     | 0.046 ± 0.005             |     | 0.078 ± 0.009     |     |
| SO <sub>4</sub> <sup>2-</sup> | 1.344 ± 0.069                      |     | 1.479 ± 0.079     |     | 0.039 ± 0.008      |     | 0.390 ± 0.026     |     | 7.380 ± 0.371               |     | 6.212 ± 0.315     |     | 0.772 ± 0.041             |     | 0.560 ± 0.032     |     |
| NH <sub>4</sub> <sup>+</sup>  | 0.002 ± 0.000                      |     | 0.017 ± 0.002     |     | 0.028 ± 0.002      |     | 0.030 ± 0.003     |     | 0.086 ± 0.005               |     | 0.220 ± 0.012     |     | 0.005 ± 0.001             |     | 0.000 ± 0.001     |     |
| Ca <sup>2+</sup>              | 1.150 ± 0.059                      |     | 1.064 ± 0.075     |     | 2.151 ± 0.217      |     | 2.849 ± 0.096     |     | 3.427 ± 0.059               |     | 3.010 ± 0.072     |     | 2.981 ± 0.062             |     | 3.173 ± 0.059     |     |
| K <sup>+</sup>                | 0.713 ± 0.021                      |     | 0.776 ± 0.075     |     | 0.055 ± 0.082      |     | 0.143 ± 0.096     |     | 0.136 ± 0.028               |     | 0.189 ± 0.069     |     | 0.334 ± 0.032             |     | 0.483 ± 0.059     |     |
| Mg <sup>2+</sup>              | 0.971 ± 0.021                      |     | 1.098 ± 0.075     |     | 0.796 ± 0.082      |     | 1.230 ± 0.096     |     | 0.092 ± 0.028               |     | 0.139 ± 0.069     |     | 0.221 ± 0.032             |     | 0.362 ± 0.059     |     |
| Na <sup>+</sup>               | 13.685 ± 0.023                     |     | 12.389 ± 0.075    |     | 0.026 ± 0.082      |     | 0.308 ± 0.096     |     | 0.101 ± 0.028               |     | 0.140 ± 0.069     |     | 1.976 ± 0.043             |     | 2.043 ± 0.059     |     |

Supplement S4.1 - Chemical Concentrations (mass %) of Grab Soil Samples Re-suspended onto Filters, for PM<sub>10</sub> and PM<sub>2.5</sub> Fractions

| Sample #                      | S1049                              |     |                   |     | S1050                               |     |                   |     | S1051                               |     |                    |     | S1052                                 |     |                   |     |
|-------------------------------|------------------------------------|-----|-------------------|-----|-------------------------------------|-----|-------------------|-----|-------------------------------------|-----|--------------------|-----|---------------------------------------|-----|-------------------|-----|
| Locality                      | Chad, Bodélé Depression, Sample 44 |     |                   |     | Chad, Bodélé Depression, Sample 44B |     |                   |     | Chad, Bodélé Depression, Sample 44C |     |                    |     | USA, Reno NV, Peavine Mtn, white clay |     |                   |     |
| Particle Size                 | PM <sub>10</sub>                   |     | PM <sub>2.5</sub> |     | PM <sub>10</sub>                    |     | PM <sub>2.5</sub> |     | PM <sub>10</sub>                    |     | PM <sub>2.5</sub>  |     | PM <sub>10</sub>                      |     | PM <sub>2.5</sub> |     |
|                               | Conc                               | Unc | Conc              | Unc | Conc                                | Unc | Conc              | Unc | Conc                                | Unc | Conc               | Unc | Conc                                  | Unc | Conc              | Unc |
|                               | %                                  | %   | %                 | %   | %                                   | %   | %                 | %   | %                                   | %   | %                  | %   | %                                     | %   | %                 | %   |
| <b>Majors</b>                 |                                    |     |                   |     |                                     |     |                   |     |                                     |     |                    |     |                                       |     |                   |     |
| Si                            | 7.854 ± 0.019                      |     | 16.631 ± 0.047    |     | 12.059 ± 0.029                      |     | 17.026 ± 0.046    |     | 26.503 ± 0.064                      |     | 26.206 ± 0.089     |     | 23.743 ± 0.063                        |     | 25.194 ± 0.068    |     |
| Ti                            | 0.101 ± 0.002                      |     | 0.181 ± 0.005     |     | 0.133 ± 0.002                       |     | 0.152 ± 0.004     |     | 0.361 ± 0.006                       |     | 0.323 ± 0.010      |     | 0.173 ± 0.005                         |     | 0.176 ± 0.006     |     |
| Al                            | 1.729 ± 0.014                      |     | 3.547 ± 0.037     |     | 2.118 ± 0.020                       |     | 2.995 ± 0.033     |     | 5.070 ± 0.042                       |     | 5.300 ± 0.073      |     | 3.309 ± 0.040                         |     | 3.857 ± 0.046     |     |
| Fe                            | 1.065 ± 0.003                      |     | 1.863 ± 0.006     |     | 1.504 ± 0.003                       |     | 1.779 ± 0.006     |     | 2.853 ± 0.008                       |     | 2.715 ± 0.012      |     | 1.650 ± 0.007                         |     | 1.752 ± 0.007     |     |
| Mg                            | 0.046 ± 0.003                      |     | 0.007 ± 0.010     |     | 0.085 ± 0.004                       |     | 0.029 ± 0.009     |     | 0.000 ± 0.011                       |     | 0.000 ± 0.020      |     | 0.000 ± 0.011                         |     | 0.000 ± 0.013     |     |
| Ca                            | 7.986 ± 0.014                      |     | 9.077 ± 0.018     |     | 12.575 ± 0.022                      |     | 9.307 ± 0.018     |     | 0.176 ± 0.003                       |     | 0.135 ± 0.007      |     | 0.442 ± 0.003                         |     | 0.413 ± 0.004     |     |
| K                             | 0.181 ± 0.002                      |     | 0.318 ± 0.004     |     | 0.236 ± 0.002                       |     | 0.267 ± 0.004     |     | 0.576 ± 0.004                       |     | 0.499 ± 0.010      |     | 0.426 ± 0.004                         |     | 0.381 ± 0.005     |     |
| <b>Traces</b>                 |                                    |     |                   |     |                                     |     |                   |     |                                     |     |                    |     |                                       |     |                   |     |
| As                            | 0.00358 ± 0.00023                  |     | 0.00871 ± 0.00079 |     | 0.00232 ± 0.00022                   |     | 0.00683 ± 0.00071 |     | 0.00000 ± 0.00084                   |     | 0.00000 ± 0.00225  |     | 0.01085 ± 0.00101                     |     | 0.00021 ± 0.00115 |     |
| Be                            | 0.00009 ± 0.00006                  |     | 0.00013 ± 0.00020 |     | 0.00006 ± 0.00005                   |     | 0.00009 ± 0.00018 |     | 0.00014 ± 0.00021                   |     | 0.00011 ± 0.00056  |     | 0.00006 ± 0.00025                     |     | 0.00006 ± 0.00029 |     |
| Cd                            | 0.00001 ± 0.00006                  |     | 0.00001 ± 0.00020 |     | 0.00000 ± 0.00005                   |     | 0.00000 ± 0.00018 |     | 0.00000 ± 0.00021                   |     | 0.00001 ± 0.00056  |     | 0.00000 ± 0.00025                     |     | 0.00000 ± 0.00029 |     |
| Cr                            | 0.00609 ± 0.00012                  |     | 0.01218 ± 0.00040 |     | 0.00360 ± 0.00011                   |     | 0.00959 ± 0.00035 |     | 0.01140 ± 0.00042                   |     | 0.05111 ± 0.00113  |     | 0.02238 ± 0.00051                     |     | 0.04159 ± 0.00058 |     |
| Hg                            | 0.00000 ± 0.00012                  |     | 0.00000 ± 0.00040 |     | 0.00000 ± 0.00011                   |     | 0.00000 ± 0.00035 |     | 0.00009 ± 0.00042                   |     | 0.00017 ± 0.00113  |     | 0.00000 ± 0.00051                     |     | 0.00045 ± 0.00058 |     |
| Mn                            | 0.02698 ± 0.00023                  |     | 0.02524 ± 0.00079 |     | 0.02259 ± 0.00022                   |     | 0.03057 ± 0.00071 |     | 0.03802 ± 0.00084                   |     | 0.03785 ± 0.00225  |     | 0.00618 ± 0.00101                     |     | 0.00531 ± 0.00115 |     |
| Ni                            | 0.00112 ± 0.00023                  |     | 0.00131 ± 0.00079 |     | 0.00086 ± 0.00022                   |     | 0.00125 ± 0.00071 |     | 0.00140 ± 0.00084                   |     | 0.00143 ± 0.00225  |     | 0.00170 ± 0.00101                     |     | 0.00139 ± 0.00115 |     |
| Pb                            | 0.00049 ± 0.00006                  |     | 0.00088 ± 0.00020 |     | 0.00033 ± 0.00005                   |     | 0.00061 ± 0.00018 |     | 0.00056 ± 0.00021                   |     | 0.00065 ± 0.00056  |     | 0.00069 ± 0.00025                     |     | 0.00081 ± 0.00029 |     |
| Sb                            | 0.00008 ± 0.00006                  |     | 0.00009 ± 0.00020 |     | 0.00006 ± 0.00005                   |     | 0.00007 ± 0.00018 |     | 0.00002 ± 0.00021                   |     | -0.00002 ± 0.00056 |     | 0.00013 ± 0.00025                     |     | 0.00016 ± 0.00029 |     |
| Sr                            | 0.04243 ± 0.00011                  |     | 0.03150 ± 0.00020 |     | 0.03469 ± 0.00006                   |     | 0.03346 ± 0.00018 |     | 0.00199 ± 0.00021                   |     | 0.00167 ± 0.00056  |     | 0.00417 ± 0.00025                     |     | 0.00697 ± 0.00029 |     |
| V                             | 0.00186 ± 0.00006                  |     | 0.00216 ± 0.00020 |     | 0.00132 ± 0.00005                   |     | 0.00199 ± 0.00018 |     | 0.00303 ± 0.00021                   |     | 0.00289 ± 0.00056  |     | 0.00283 ± 0.00025                     |     | 0.00432 ± 0.00037 |     |
| Zn                            | 0.00261 ± 0.00023                  |     | 0.01036 ± 0.00079 |     | 0.00185 ± 0.00022                   |     | 0.00357 ± 0.00071 |     | 0.00325 ± 0.00084                   |     | 0.00631 ± 0.00225  |     | 0.01014 ± 0.00101                     |     | 0.01461 ± 0.00115 |     |
| <b>Ions</b>                   |                                    |     |                   |     |                                     |     |                   |     |                                     |     |                    |     |                                       |     |                   |     |
| CL <sup>-</sup>               | 0.042 ± 0.003                      |     | 0.249 ± 0.014     |     | 0.092 ± 0.005                       |     | 0.104 ± 0.006     |     | 0.179 ± 0.011                       |     | 0.274 ± 0.017      |     | 0.689 ± 0.037                         |     | 0.143 ± 0.010     |     |
| NO <sub>3</sub> <sup>-</sup>  | 0.249 ± 0.014                      |     | 0.353 ± 0.023     |     | 1.107 ± 0.057                       |     | 1.289 ± 0.069     |     | 0.490 ± 0.031                       |     | 0.654 ± 0.046      |     | 0.096 ± 0.013                         |     | 0.130 ± 0.018     |     |
| PO <sub>4</sub> <sup>3-</sup> | 0.015 ± 0.003                      |     | 0.000 ± 0.006     |     | 0.020 ± 0.003                       |     | 0.000 ± 0.006     |     | 0.000 ± 0.008                       |     | 0.119 ± 0.022      |     | 0.101 ± 0.015                         |     | 0.087 ± 0.018     |     |
| SO <sub>4</sub> <sup>2-</sup> | 0.096 ± 0.006                      |     | 0.131 ± 0.012     |     | 0.059 ± 0.005                       |     | 0.073 ± 0.009     |     | 0.130 ± 0.013                       |     | 0.186 ± 0.023      |     | 0.185 ± 0.018                         |     | 0.184 ± 0.021     |     |
| NH <sub>4</sub> <sup>+</sup>  | 0.030 ± 0.002                      |     | 0.114 ± 0.007     |     | 0.039 ± 0.002                       |     | 0.046 ± 0.003     |     | 0.151 ± 0.009                       |     | 0.183 ± 0.012      |     | 0.183 ± 0.011                         |     | 0.180 ± 0.011     |     |
| Ca <sup>2+</sup>              | 8.095 ± 0.092                      |     | 9.644 ± 0.141     |     | 8.352 ± 0.115                       |     | 9.041 ± 0.072     |     | 0.100 ± 0.095                       |     | 0.149 ± 0.200      |     | 4.229 ± 0.121                         |     | 0.283 ± 0.172     |     |
| K <sup>+</sup>                | 0.020 ± 0.025                      |     | 0.068 ± 0.081     |     | 0.023 ± 0.025                       |     | 0.051 ± 0.072     |     | 0.106 ± 0.095                       |     | 0.024 ± 0.200      |     | 0.389 ± 0.121                         |     | 0.047 ± 0.172     |     |
| Mg <sup>2+</sup>              | 0.397 ± 0.024                      |     | 0.475 ± 0.081     |     | 0.417 ± 0.025                       |     | 0.451 ± 0.072     |     | 0.076 ± 0.095                       |     | 0.085 ± 0.200      |     | 0.600 ± 0.121                         |     | 0.101 ± 0.172     |     |
| Na <sup>+</sup>               | 0.090 ± 0.024                      |     | 0.190 ± 0.081     |     | 0.156 ± 0.025                       |     | 0.208 ± 0.072     |     | 0.330 ± 0.095                       |     | 0.268 ± 0.200      |     | 0.247 ± 0.121                         |     | 0.096 ± 0.172     |     |

Supplement S4.1 - Chemical Concentrations (mass %) of Grab Soil Samples Re-suspended onto Filters, for PM<sub>10</sub> and PM<sub>2.5</sub> Fractions

| Sample #                      | S1053                                  |     |                   |     | S1055                                 |     |                   |     | S1056                              |     |                   |     | S1057                                 |     |                   |     |
|-------------------------------|----------------------------------------|-----|-------------------|-----|---------------------------------------|-----|-------------------|-----|------------------------------------|-----|-------------------|-----|---------------------------------------|-----|-------------------|-----|
|                               | USA, Reno NV, Peavine Mtn, yellow soil |     |                   |     | China, Lanzhou, Jiuzhoutai Mtn, loess |     |                   |     | Australia, Lake Eyre, Cooper Creek |     |                   |     | Australia, Lake Eyre, Warburton River |     |                   |     |
|                               | PM <sub>10</sub>                       |     | PM <sub>2.5</sub> |     | PM <sub>10</sub>                      |     | PM <sub>2.5</sub> |     | PM <sub>10</sub>                   |     | PM <sub>2.5</sub> |     | PM <sub>10</sub>                      |     | PM <sub>2.5</sub> |     |
|                               | Conc                                   | Unc | Conc              | Unc | Conc                                  | Unc | Conc              | Unc | Conc                               | Unc | Conc              | Unc | Conc                                  | Unc | Conc              | Unc |
| %                             |                                        | %   |                   | %   |                                       | %   |                   | %   |                                    | %   |                   | %   |                                       | %   |                   |     |
| <b>Majors</b>                 |                                        |     |                   |     |                                       |     |                   |     |                                    |     |                   |     |                                       |     |                   |     |
| Si                            | 11.531 ± 0.032                         |     | 16.871 ± 0.073    |     | 12.330 ± 0.029                        |     | 13.611 ± 0.042    |     | 13.164 ± 0.028                     |     | 16.591 ± 0.045    |     | 15.925 ± 0.043                        |     | 18.895 ± 0.062    |     |
| Ti                            | 0.401 ± 0.005                          |     | 0.414 ± 0.012     |     | 0.335 ± 0.003                         |     | 0.305 ± 0.006     |     | 0.368 ± 0.003                      |     | 0.355 ± 0.006     |     | 0.477 ± 0.006                         |     | 0.484 ± 0.009     |     |
| Al                            | 4.602 ± 0.029                          |     | 7.167 ± 0.079     |     | 4.237 ± 0.024                         |     | 5.642 ± 0.043     |     | 5.182 ± 0.023                      |     | 6.723 ± 0.042     |     | 6.753 ± 0.039                         |     | 8.058 ± 0.064     |     |
| Fe                            | 4.522 ± 0.010                          |     | 6.080 ± 0.020     |     | 4.172 ± 0.008                         |     | 4.149 ± 0.011     |     | 4.680 ± 0.009                      |     | 4.728 ± 0.011     |     | 5.102 ± 0.012                         |     | 5.436 ± 0.015     |     |
| Mg                            | 0.000 ± 0.007                          |     | 0.000 ± 0.022     |     | 0.449 ± 0.006                         |     | 0.958 ± 0.013     |     | 0.007 ± 0.006                      |     | 0.123 ± 0.012     |     | 0.000 ± 0.010                         |     | 0.000 ± 0.018     |     |
| Ca                            | 0.279 ± 0.002                          |     | 0.339 ± 0.007     |     | 7.793 ± 0.014                         |     | 8.392 ± 0.017     |     | 3.879 ± 0.007                      |     | 3.459 ± 0.008     |     | 0.712 ± 0.003                         |     | 0.675 ± 0.005     |     |
| K                             | 0.704 ± 0.003                          |     | 0.831 ± 0.011     |     | 2.168 ± 0.006                         |     | 2.357 ± 0.008     |     | 1.419 ± 0.004                      |     | 1.582 ± 0.006     |     | 1.231 ± 0.005                         |     | 1.311 ± 0.007     |     |
| <b>Traces</b>                 |                                        |     |                   |     |                                       |     |                   |     |                                    |     |                   |     |                                       |     |                   |     |
| As                            | 0.00088 ± 0.00053                      |     | 0.02618 ± 0.00245 |     | 0.00152 ± 0.00019                     |     | 0.00224 ± 0.00080 |     | 0.00115 ± 0.00020                  |     | 0.00143 ± 0.00068 |     | 0.00081 ± 0.00063                     |     | 0.00110 ± 0.00142 |     |
| Be                            | 0.00005 ± 0.00013                      |     | 0.00005 ± 0.00061 |     | 0.00011 ± 0.00005                     |     | 0.00015 ± 0.00020 |     | 0.00010 ± 0.00005                  |     | 0.00009 ± 0.00017 |     | 0.00012 ± 0.00016                     |     | 0.00010 ± 0.00035 |     |
| Cd                            | 0.00003 ± 0.00013                      |     | 0.00002 ± 0.00061 |     | 0.00003 ± 0.00005                     |     | 0.00003 ± 0.00020 |     | 0.00001 ± 0.00005                  |     | 0.00002 ± 0.00017 |     | 0.00001 ± 0.00016                     |     | 0.00002 ± 0.00035 |     |
| Cr                            | 0.02202 ± 0.00027                      |     | 0.04981 ± 0.00122 |     | 0.00628 ± 0.00009                     |     | 0.02031 ± 0.00048 |     | 0.01057 ± 0.00010                  |     | 0.01469 ± 0.00034 |     | 0.02271 ± 0.00032                     |     | 0.03445 ± 0.00071 |     |
| Hg                            | 0.00004 ± 0.00027                      |     | 0.00147 ± 0.00122 |     | 0.00003 ± 0.00009                     |     | 0.00010 ± 0.00040 |     | 0.00004 ± 0.00010                  |     | 0.00008 ± 0.00034 |     | 0.00008 ± 0.00031                     |     | 0.00018 ± 0.00071 |     |
| Mn                            | 0.03013 ± 0.00151                      |     | 0.03215 ± 0.00245 |     | 0.06171 ± 0.00019                     |     | 0.07614 ± 0.00080 |     | 0.04074 ± 0.00020                  |     | 0.04243 ± 0.00068 |     | 0.07703 ± 0.00063                     |     | 0.06893 ± 0.00142 |     |
| Ni                            | 0.00155 ± 0.00053                      |     | 0.00253 ± 0.00245 |     | 0.00315 ± 0.00019                     |     | 0.00424 ± 0.00080 |     | 0.00390 ± 0.00020                  |     | 0.00456 ± 0.00068 |     | 0.00495 ± 0.00063                     |     | 0.00464 ± 0.00142 |     |
| Pb                            | 0.00184 ± 0.00013                      |     | 0.00157 ± 0.00061 |     | 0.00208 ± 0.00005                     |     | 0.00261 ± 0.00020 |     | 0.00101 ± 0.00005                  |     | 0.00114 ± 0.00017 |     | 0.00095 ± 0.00016                     |     | 0.00102 ± 0.00035 |     |
| Sb                            | 0.00017 ± 0.00013                      |     | 0.00025 ± 0.00061 |     | 0.00010 ± 0.00005                     |     | 0.00014 ± 0.00020 |     | 0.00003 ± 0.00005                  |     | 0.00005 ± 0.00017 |     | 0.00003 ± 0.00016                     |     | 0.00006 ± 0.00035 |     |
| Sr                            | 0.00801 ± 0.00013                      |     | 0.00324 ± 0.00061 |     | 0.03266 ± 0.00012                     |     | 0.04704 ± 0.00099 |     | 0.04890 ± 0.00024                  |     | 0.04883 ± 0.00243 |     | 0.01269 ± 0.00016                     |     | 0.01233 ± 0.00057 |     |
| V                             | 0.00684 ± 0.00020                      |     | 0.00804 ± 0.00061 |     | 0.00409 ± 0.00005                     |     | 0.00460 ± 0.00020 |     | 0.00882 ± 0.00005                  |     | 0.00822 ± 0.00017 |     | 0.00873 ± 0.00016                     |     | 0.00861 ± 0.00035 |     |
| Zn                            | 0.01077 ± 0.00053                      |     | 0.01434 ± 0.00245 |     | 0.00671 ± 0.00019                     |     | 0.01201 ± 0.00080 |     | 0.00529 ± 0.00020                  |     | 0.00847 ± 0.00068 |     | 0.01070 ± 0.00063                     |     | 0.01341 ± 0.00142 |     |
| <b>Ions</b>                   |                                        |     |                   |     |                                       |     |                   |     |                                    |     |                   |     |                                       |     |                   |     |
| Cl <sup>-</sup>               | 0.068 ± 0.004                          |     | 0.421 ± 0.026     |     | 0.401 ± 0.021                         |     | 1.084 ± 0.056     |     | 0.439 ± 0.022                      |     | 0.776 ± 0.040     |     | 0.629 ± 0.032                         |     | 0.797 ± 0.042     |     |
| NO <sub>3</sub> <sup>-</sup>  | 0.040 ± 0.006                          |     | 0.470 ± 0.040     |     | 0.036 ± 0.004                         |     | 0.146 ± 0.014     |     | 0.031 ± 0.003                      |     | 0.082 ± 0.009     |     | 0.059 ± 0.006                         |     | 0.083 ± 0.013     |     |
| PO <sub>4</sub> <sup>3-</sup> | 0.000 ± 0.005                          |     | 0.000 ± 0.020     |     | 0.035 ± 0.004                         |     | 0.167 ± 0.017     |     | 0.110 ± 0.007                      |     | 0.159 ± 0.014     |     | 0.087 ± 0.009                         |     | 0.109 ± 0.017     |     |
| SO <sub>4</sub> <sup>2-</sup> | 0.053 ± 0.006                          |     | 0.102 ± 0.022     |     | 0.691 ± 0.036                         |     | 0.784 ± 0.047     |     | 0.989 ± 0.051                      |     | 1.326 ± 0.071     |     | 0.331 ± 0.020                         |     | 0.415 ± 0.030     |     |
| NH <sub>4</sub> <sup>+</sup>  | 0.131 ± 0.007                          |     | 0.355 ± 0.021     |     | 0.027 ± 0.002                         |     | 0.097 ± 0.006     |     | 0.025 ± 0.002                      |     | 0.083 ± 0.005     |     | 0.094 ± 0.005                         |     | 0.201 ± 0.012     |     |
| Ca <sup>2+</sup>              | 0.086 ± 0.056                          |     | 0.445 ± 0.250     |     | 7.658 ± 0.434                         |     | 12.605 ± 0.868    |     | 3.407 ± 0.211                      |     | 3.366 ± 0.073     |     | 0.446 ± 0.055                         |     | 0.471 ± 0.138     |     |
| K <sup>+</sup>                | 0.049 ± 0.056                          |     | 0.149 ± 0.250     |     | 0.129 ± 0.027                         |     | 0.238 ± 0.110     |     | 0.237 ± 0.023                      |     | 0.312 ± 0.073     |     | 0.229 ± 0.055                         |     | 0.221 ± 0.138     |     |
| Mg <sup>2+</sup>              | 0.063 ± 0.056                          |     | 0.186 ± 0.250     |     | 0.474 ± 0.027                         |     | 1.147 ± 0.110     |     | 0.401 ± 0.023                      |     | 0.541 ± 0.073     |     | 0.268 ± 0.055                         |     | 0.250 ± 0.138     |     |
| Na <sup>+</sup>               | 0.010 ± 0.056                          |     | 0.056 ± 0.250     |     | 0.257 ± 0.027                         |     | 0.479 ± 0.110     |     | 0.904 ± 0.023                      |     | 1.093 ± 0.073     |     | 0.562 ± 0.055                         |     | 0.599 ± 0.138     |     |

Supplement S4.1 - Chemical Concentrations (mass %) of Grab Soil Samples Re-suspended onto Filters, for PM<sub>10</sub> and PM<sub>2.5</sub> Fractions

| Sample #                      | S1058                 |     |                   |     | S1060                              |     |                   |     | S1062                                |     |                   |     | S1064                          |     |                   |     |
|-------------------------------|-----------------------|-----|-------------------|-----|------------------------------------|-----|-------------------|-----|--------------------------------------|-----|-------------------|-----|--------------------------------|-----|-------------------|-----|
|                               | Australia, Lake Frome |     |                   |     | Serbia, Batajnica, Danube R, loess |     |                   |     | Serbia, Kostolac, Lignite pit, loess |     |                   |     | Serbia, Stari Slankamen, loess |     |                   |     |
|                               | PM <sub>10</sub>      |     | PM <sub>2.5</sub> |     | PM <sub>10</sub>                   |     | PM <sub>2.5</sub> |     | PM <sub>10</sub>                     |     | PM <sub>2.5</sub> |     | PM <sub>10</sub>               |     | PM <sub>2.5</sub> |     |
|                               | Conc                  | Unc | Conc              | Unc | Conc                               | Unc | Conc              | Unc | Conc                                 | Unc | Conc              | Unc | Conc                           | Unc | Conc              | Unc |
| %                             |                       | %   |                   | %   |                                    | %   |                   | %   |                                      | %   |                   | %   |                                | %   |                   |     |
| <b>Majors</b>                 |                       |     |                   |     |                                    |     |                   |     |                                      |     |                   |     |                                |     |                   |     |
| Si                            | 8.109 ± 0.027         |     | 16.095 ± 0.085    |     | 14.169 ± 0.031                     |     | 16.949 ± 0.050    |     | 14.047 ± 0.032                       |     | 17.341 ± 0.052    |     | 14.189 ± 0.034                 |     | 14.699 ± 0.051    |     |
| Ti                            | 0.217 ± 0.004         |     | 0.377 ± 0.015     |     | 0.495 ± 0.004                      |     | 0.422 ± 0.007     |     | 0.450 ± 0.004                        |     | 0.454 ± 0.008     |     | 0.398 ± 0.004                  |     | 0.329 ± 0.008     |     |
| Al                            | 2.850 ± 0.027         |     | 5.740 ± 0.095     |     | 6.053 ± 0.024                      |     | 7.761 ± 0.050     |     | 5.861 ± 0.027                        |     | 7.732 ± 0.054     |     | 6.042 ± 0.030                  |     | 6.404 ± 0.056     |     |
| Fe                            | 2.591 ± 0.007         |     | 4.701 ± 0.021     |     | 6.628 ± 0.011                      |     | 6.741 ± 0.015     |     | 5.665 ± 0.010                        |     | 6.488 ± 0.016     |     | 5.697 ± 0.011                  |     | 5.323 ± 0.014     |     |
| Mg                            | 0.760 ± 0.010         |     | 2.136 ± 0.036     |     | 0.026 ± 0.006                      |     | 0.159 ± 0.014     |     | 0.302 ± 0.007                        |     | 0.538 ± 0.016     |     | 0.208 ± 0.007                  |     | 0.359 ± 0.016     |     |
| Ca                            | 0.549 ± 0.003         |     | 0.907 ± 0.011     |     | 0.737 ± 0.002                      |     | 0.775 ± 0.004     |     | 1.411 ± 0.004                        |     | 1.394 ± 0.006     |     | 3.794 ± 0.008                  |     | 4.940 ± 0.013     |     |
| K                             | 1.077 ± 0.005         |     | 1.887 ± 0.016     |     | 2.237 ± 0.005                      |     | 2.234 ± 0.008     |     | 2.176 ± 0.005                        |     | 2.419 ± 0.009     |     | 2.139 ± 0.006                  |     | 1.939 ± 0.009     |     |
| <b>Traces</b>                 |                       |     |                   |     |                                    |     |                   |     |                                      |     |                   |     |                                |     |                   |     |
| As                            | 0.01044 ± 0.00061     |     | 0.00170 ± 0.00354 |     | 0.00150 ± 0.00018                  |     | 0.00234 ± 0.00089 |     | 0.00161 ± 0.00032                    |     | 0.00213 ± 0.00100 |     | 0.00166 ± 0.00038              |     | 0.00223 ± 0.00124 |     |
| Be                            | 0.00011 ± 0.00015     |     | 0.00008 ± 0.00088 |     | 0.00016 ± 0.00005                  |     | 0.00018 ± 0.00022 |     | 0.00016 ± 0.00008                    |     | 0.00017 ± 0.00025 |     | 0.00013 ± 0.00009              |     | 0.00016 ± 0.00031 |     |
| Cd                            | 0.00006 ± 0.00015     |     | 0.00002 ± 0.00088 |     | 0.00003 ± 0.00005                  |     | 0.00004 ± 0.00022 |     | 0.00002 ± 0.00008                    |     | 0.00004 ± 0.00025 |     | 0.00003 ± 0.00009              |     | 0.00003 ± 0.00031 |     |
| Cr                            | 0.01924 ± 0.00031     |     | 0.08515 ± 0.00177 |     | 0.00849 ± 0.00009                  |     | 0.02801 ± 0.00044 |     | 0.01169 ± 0.00016                    |     | 0.02451 ± 0.00050 |     | 0.01147 ± 0.00019              |     | 0.02906 ± 0.00062 |     |
| Hg                            | 0.00006 ± 0.00031     |     | 0.00038 ± 0.00177 |     | 0.00005 ± 0.00009                  |     | 0.00012 ± 0.00044 |     | 0.00004 ± 0.00016                    |     | 0.00011 ± 0.00050 |     | 0.00005 ± 0.00019              |     | 0.00012 ± 0.00062 |     |
| Mn                            | 0.06269 ± 0.00061     |     | 0.13220 ± 0.00354 |     | 0.11513 ± 0.00056                  |     | 0.15961 ± 0.00102 |     | 0.07738 ± 0.00032                    |     | 0.09150 ± 0.00100 |     | 0.08833 ± 0.00038              |     | 0.09929 ± 0.00215 |     |
| Ni                            | 0.00236 ± 0.00061     |     | 0.01094 ± 0.00354 |     | 0.00594 ± 0.00018                  |     | 0.00778 ± 0.00089 |     | 0.00647 ± 0.00032                    |     | 0.00759 ± 0.00100 |     | 0.00594 ± 0.00038              |     | 0.00663 ± 0.00124 |     |
| Pb                            | 0.00247 ± 0.00015     |     | 0.00181 ± 0.00088 |     | 0.00275 ± 0.00005                  |     | 0.00330 ± 0.00022 |     | 0.00250 ± 0.00008                    |     | 0.00288 ± 0.00025 |     | 0.00226 ± 0.00009              |     | 0.00258 ± 0.00031 |     |
| Sb                            | 0.00028 ± 0.00015     |     | 0.00028 ± 0.00088 |     | 0.00009 ± 0.00005                  |     | 0.00013 ± 0.00022 |     | 0.00009 ± 0.00008                    |     | 0.00012 ± 0.00025 |     | 0.00009 ± 0.00009              |     | 0.00012 ± 0.00031 |     |
| Sr                            | 0.09034 ± 0.00018     |     | 0.01071 ± 0.00088 |     | 0.00399 ± 0.00005                  |     | 0.00594 ± 0.00024 |     | 0.00409 ± 0.00008                    |     | 0.00533 ± 0.00025 |     | 0.00508 ± 0.00009              |     | 0.00780 ± 0.00031 |     |
| V                             | 0.00266 ± 0.00015     |     | 0.00554 ± 0.00088 |     | 0.00651 ± 0.00005                  |     | 0.00731 ± 0.00022 |     | 0.00621 ± 0.00008                    |     | 0.00652 ± 0.00025 |     | 0.00579 ± 0.00009              |     | 0.00588 ± 0.00031 |     |
| Zn                            | 0.00982 ± 0.00061     |     | 0.01962 ± 0.00354 |     | 0.00908 ± 0.00018                  |     | 0.01428 ± 0.00089 |     | 0.01068 ± 0.00032                    |     | 0.01724 ± 0.00100 |     | 0.00918 ± 0.00038              |     | 0.01454 ± 0.00124 |     |
| <b>Ions</b>                   |                       |     |                   |     |                                    |     |                   |     |                                      |     |                   |     |                                |     |                   |     |
| Cl <sup>-</sup>               | 2.626 ± 0.132         |     | 4.136 ± 0.216     |     | 0.187 ± 0.010                      |     | 0.616 ± 0.033     |     | 0.037 ± 0.002                        |     | 0.785 ± 0.043     |     | 0.503 ± 0.026                  |     | 0.577 ± 0.032     |     |
| NO <sub>3</sub> <sup>-</sup>  | 0.034 ± 0.005         |     | 0.445 ± 0.054     |     | 0.113 ± 0.007                      |     | 0.228 ± 0.020     |     | 0.017 ± 0.003                        |     | 0.114 ± 0.017     |     | 0.048 ± 0.005                  |     | 0.097 ± 0.015     |     |
| PO <sub>4</sub> <sup>3-</sup> | 0.050 ± 0.007         |     | 0.000 ± 0.040     |     | 0.035 ± 0.004                      |     | 0.100 ± 0.015     |     | 0.024 ± 0.004                        |     | 0.000 ± 0.015     |     | 0.039 ± 0.005                  |     | 0.071 ± 0.017     |     |
| SO <sub>4</sub> <sup>2-</sup> | 0.644 ± 0.036         |     | 1.251 ± 0.096     |     | 0.126 ± 0.008                      |     | 0.225 ± 0.020     |     | 0.033 ± 0.004                        |     | 0.112 ± 0.018     |     | 0.187 ± 0.012                  |     | 0.242 ± 0.023     |     |
| NH <sub>4</sub> <sup>+</sup>  | 0.017 ± 0.002         |     | 0.340 ± 0.023     |     | 0.064 ± 0.004                      |     | 0.266 ± 0.015     |     | 0.053 ± 0.003                        |     | 0.342 ± 0.019     |     | 0.178 ± 0.009                  |     | 0.231 ± 0.014     |     |
| Ca <sup>2+</sup>              | 0.716 ± 0.056         |     | 1.440 ± 0.493     |     | 0.283 ± 0.027                      |     | 0.564 ± 0.127     |     | 1.380 ± 0.120                        |     | 1.933 ± 0.182     |     | 4.174 ± 0.044                  |     | 7.074 ± 0.676     |     |
| K <sup>+</sup>                | 0.079 ± 0.056         |     | 0.170 ± 0.493     |     | 0.076 ± 0.027                      |     | 0.075 ± 0.127     |     | 0.072 ± 0.030                        |     | 0.213 ± 0.182     |     | 0.088 ± 0.044                  |     | 0.134 ± 0.162     |     |
| Mg <sup>2+</sup>              | 0.598 ± 0.056         |     | 2.407 ± 0.493     |     | 0.171 ± 0.027                      |     | 0.229 ± 0.127     |     | 0.573 ± 0.030                        |     | 0.867 ± 0.182     |     | 0.535 ± 0.044                  |     | 0.582 ± 0.162     |     |
| Na <sup>+</sup>               | 2.308 ± 0.056         |     | 2.764 ± 0.493     |     | 0.091 ± 0.027                      |     | 0.231 ± 0.127     |     | 0.033 ± 0.030                        |     | 0.100 ± 0.182     |     | 0.121 ± 0.044                  |     | 0.285 ± 0.162     |     |

Supplement S4.1 - Chemical Concentrations (mass %) of Grab Soil Samples Re-suspended onto Filters, for PM<sub>10</sub> and PM<sub>2.5</sub> Fractions

| Sample #                      | S1065                                 |     |                   |     | S1066                  |     |                   |     | S2001                    |     |                   |     | S2002               |     |                   |     |
|-------------------------------|---------------------------------------|-----|-------------------|-----|------------------------|-----|-------------------|-----|--------------------------|-----|-------------------|-----|---------------------|-----|-------------------|-----|
| Locality                      | USA, Carbondale, California, red clay |     |                   |     | USA, Arizona Road Dust |     |                   |     | Djibouti, Camp Lemonnier |     |                   |     | Afghanistan, Bagram |     |                   |     |
| Particle Size                 | PM <sub>10</sub>                      |     | PM <sub>2.5</sub> |     | PM <sub>10</sub>       |     | PM <sub>2.5</sub> |     | PM <sub>10</sub>         |     | PM <sub>2.5</sub> |     | PM <sub>10</sub>    |     | PM <sub>2.5</sub> |     |
|                               | Conc                                  | Unc | Conc              | Unc | Conc                   | Unc | Conc              | Unc | Conc                     | Unc | Conc              | Unc | Conc                | Unc | Conc              | Unc |
|                               | %                                     | %   | %                 | %   | %                      | %   | %                 | %   | %                        | %   | %                 | %   | %                   | %   | %                 | %   |
| <b>Majors</b>                 |                                       |     |                   |     |                        |     |                   |     |                          |     |                   |     |                     |     |                   |     |
| Si                            | 13.119 ± 0.043                        |     | 12.499 ± 0.046    |     | 24.352 ± 0.056         |     | 24.424 ± 0.049    |     | 8.701 ± 0.061            |     | 10.775 ± 0.083    |     | 8.409 ± 0.059       |     | 10.034 ± 0.079    |     |
| Ti                            | 0.572 ± 0.009                         |     | 0.532 ± 0.010     |     | 0.183 ± 0.004          |     | 0.223 ± 0.003     |     | 0.466 ± 0.002            |     | 0.461 ± 0.003     |     | 0.320 ± 0.001       |     | 0.351 ± 0.003     |     |
| Al                            | 10.803 ± 0.056                        |     | 11.267 ± 0.064    |     | 2.975 ± 0.031          |     | 4.022 ± 0.026     |     | 3.590 ± 0.027            |     | 4.754 ± 0.043     |     | 4.016 ± 0.030       |     | 5.381 ± 0.048     |     |
| Fe                            | 9.912 ± 0.021                         |     | 10.051 ± 0.021    |     | 1.384 ± 0.005          |     | 2.198 ± 0.005     |     | 4.969 ± 0.012            |     | 5.248 ± 0.016     |     | 4.183 ± 0.011       |     | 4.645 ± 0.015     |     |
| Mg                            | 0.000 ± 0.011                         |     | 0.000 ± 0.013     |     | 0.000 ± 0.008          |     | 0.000 ± 0.007     |     | 1.677 ± 0.037            |     | 2.534 ± 0.105     |     | 1.385 ± 0.036       |     | 1.889 ± 0.103     |     |
| Ca                            | 0.180 ± 0.003                         |     | 0.164 ± 0.003     |     | 1.309 ± 0.005          |     | 1.511 ± 0.004     |     | 12.530 ± 0.027           |     | 10.640 ± 0.025    |     | 15.144 ± 0.033      |     | 15.571 ± 0.035    |     |
| K                             | 0.358 ± 0.004                         |     | 0.364 ± 0.005     |     | 1.753 ± 0.006          |     | 2.209 ± 0.006     |     | 1.371 ± 0.004            |     | 1.531 ± 0.006     |     | 2.007 ± 0.006       |     | 2.274 ± 0.008     |     |
| <b>Traces</b>                 |                                       |     |                   |     |                        |     |                   |     |                          |     |                   |     |                     |     |                   |     |
| As                            | 0.01175 ± 0.00093                     |     | 0.00152 ± 0.00116 |     | 0.00000 ± 0.00064      |     | 0.00068 ± 0.00035 |     | 0.00034 ± 0.00008        |     | 0.00058 ± 0.00000 |     | 0.00132 ± 0.00006   |     | 0.00227 ± 0.00007 |     |
| Be                            | 0.00010 ± 0.00023                     |     | 0.00011 ± 0.00029 |     | 0.00006 ± 0.00016      |     | 0.00007 ± 0.00009 |     | 0.00010 ± 0.00002        |     | 0.00029 ± 0.00002 |     | 0.00009 ± 0.00002   |     | 0.00030 ± 0.00001 |     |
| Cd                            | 0.00000 ± 0.00023                     |     | 0.00001 ± 0.00029 |     | 0.00001 ± 0.00016      |     | 0.00002 ± 0.00009 |     | 0.00003 ± 0.00000        |     | 0.00012 ± 0.00001 |     | 0.00005 ± 0.00000   |     | 0.00544 ± 0.00009 |     |
| Cr                            | 0.03260 ± 0.00046                     |     | 0.05279 ± 0.00058 |     | 0.02284 ± 0.00032      |     | 0.00963 ± 0.00017 |     | 0.00000 ± 0.00006        |     | 0.00002 ± 0.00032 |     | 0.00001 ± 0.00009   |     | 0.00002 ± 0.00036 |     |
| Hg                            | 0.00000 ± 0.00046                     |     | 0.00003 ± 0.00058 |     | 0.00006 ± 0.00032      |     | 0.00006 ± 0.00017 |     | 0.00003 ± 0.00000        |     | 0.00012 ± 0.00001 |     | 0.00003 ± 0.00000   |     | 0.00012 ± 0.00001 |     |
| Mn                            | 0.01252 ± 0.00093                     |     | 0.01324 ± 0.00116 |     | 0.02540 ± 0.00064      |     | 0.03986 ± 0.00035 |     | 0.06199 ± 0.00007        |     | 0.14153 ± 0.00102 |     | 0.05296 ± 0.00017   |     | 0.08065 ± 0.00043 |     |
| Ni                            | 0.00178 ± 0.00093                     |     | 0.00112 ± 0.00116 |     | 0.00182 ± 0.00064      |     | 0.00154 ± 0.00035 |     | 0.00311 ± 0.00004        |     | 0.00642 ± 0.00015 |     | 0.00427 ± 0.00005   |     | 0.03606 ± 0.00005 |     |
| Pb                            | 0.00144 ± 0.00023                     |     | 0.00155 ± 0.00029 |     | 0.00095 ± 0.00016      |     | 0.00146 ± 0.00009 |     | 0.00076 ± 0.00000        |     | 0.00230 ± 0.00001 |     | 0.00413 ± 0.00003   |     | 0.00639 ± 0.00004 |     |
| Sb                            | 0.00021 ± 0.00023                     |     | 0.00018 ± 0.00029 |     | 0.00006 ± 0.00016      |     | 0.00009 ± 0.00009 |     | 0.00008 ± 0.00000        |     | 0.00029 ± 0.00000 |     | 0.00012 ± 0.00000   |     | 0.00030 ± 0.00001 |     |
| Sr                            | 0.00899 ± 0.00023                     |     | 0.00931 ± 0.00029 |     | 0.01017 ± 0.00016      |     | 0.01070 ± 0.00040 |     | 0.03524 ± 0.00026        |     | 0.06787 ± 0.00053 |     | 0.02374 ± 0.00032   |     | 0.03077 ± 0.00020 |     |
| V                             | 0.03201 ± 0.00023                     |     | 0.02395 ± 0.00029 |     | 0.00223 ± 0.00016      |     | 0.00261 ± 0.00009 |     | 0.00396 ± 0.00003        |     | 0.00813 ± 0.00010 |     | 0.00495 ± 0.00015   |     | 0.00695 ± 0.00013 |     |
| Zn                            | 0.01576 ± 0.00093                     |     | 0.01518 ± 0.00116 |     | 0.00449 ± 0.00064      |     | 0.00587 ± 0.00035 |     | 0.01252 ± 0.00031        |     | 0.04571 ± 0.00025 |     | 0.01568 ± 0.00008   |     | 0.04651 ± 0.00037 |     |
| <b>Ions</b>                   |                                       |     |                   |     |                        |     |                   |     |                          |     |                   |     |                     |     |                   |     |
| Cl <sup>-</sup>               | 0.617 ± 0.033                         |     | 0.081 ± 0.006     |     | 0.053 ± 0.004          |     | 0.271 ± 0.014     |     | 0.084 ± 0.018            |     | 0.115 ± 0.052     |     | 0.023 ± 0.018       |     | 0.040 ± 0.053     |     |
| NO <sub>3</sub> <sup>-</sup>  | 0.092 ± 0.011                         |     | 0.061 ± 0.011     |     | 0.041 ± 0.006          |     | 0.035 ± 0.004     |     | 0.071 ± 0.019            |     | 0.070 ± 0.052     |     | 0.011 ± 0.018       |     | 0.010 ± 0.053     |     |
| PO <sub>4</sub> <sup>3-</sup> | 0.000 ± 0.008                         |     | 0.000 ± 0.010     |     | 0.030 ± 0.006          |     | 0.052 ± 0.006     |     | 0.000 ± 0.000            |     | 0.000 ± 0.000     |     | 0.000 ± 0.000       |     | 0.000 ± 0.000     |     |
| SO <sub>4</sub> <sup>2-</sup> | 0.289 ± 0.021                         |     | 0.239 ± 0.020     |     | 0.159 ± 0.012          |     | 0.082 ± 0.007     |     | 2.740 ± 0.195            |     | 1.778 ± 0.136     |     | 0.342 ± 0.030       |     | 0.278 ± 0.057     |     |
| NH <sub>4</sub> <sup>+</sup>  | 0.278 ± 0.015                         |     | 0.129 ± 0.008     |     | 0.021 ± 0.002          |     | 0.061 ± 0.004     |     | 0.053 ± 0.019            |     | 0.084 ± 0.053     |     | 0.043 ± 0.020       |     | 0.071 ± 0.055     |     |
| Ca <sup>2+</sup>              | 0.270 ± 0.099                         |     | 0.156 ± 0.124     |     | 0.857 ± 0.184          |     | 0.910 ± 0.039     |     | 15.331 ± 1.096           |     | 11.727 ± 0.843    |     | 15.605 ± 1.118      |     | 13.807 ± 0.996    |     |
| K <sup>+</sup>                | 0.023 ± 0.099                         |     | 0.038 ± 0.124     |     | 0.467 ± 0.059          |     | 0.146 ± 0.039     |     | 0.271 ± 0.019            |     | 0.391 ± 0.028     |     | 0.268 ± 0.019       |     | 0.387 ± 0.028     |     |
| Mg <sup>2+</sup>              | 0.058 ± 0.099                         |     | 0.053 ± 0.124     |     | 0.179 ± 0.059          |     | 0.115 ± 0.039     |     | 0.268 ± 0.019            |     | 0.451 ± 0.032     |     | 0.285 ± 0.020       |     | 0.399 ± 0.029     |     |
| Na <sup>+</sup>               | 0.066 ± 0.099                         |     | 0.025 ± 0.124     |     | 0.427 ± 0.059          |     | 0.138 ± 0.039     |     | 0.070 ± 0.005            |     | 0.083 ± 0.007     |     | 0.027 ± 0.002       |     | 0.037 ± 0.004     |     |

Supplement S4.1 - Chemical Concentrations (mass %) of Grab Soil Samples Re-suspended onto Filters, for PM<sub>10</sub> and PM<sub>2.5</sub> Fractions

| Sample #                      | S2003               |     |                   |     | S2004             |     |                   |     | S2005             |     |                   |     | S2006             |     |                   |     |             |  |  |  |
|-------------------------------|---------------------|-----|-------------------|-----|-------------------|-----|-------------------|-----|-------------------|-----|-------------------|-----|-------------------|-----|-------------------|-----|-------------|--|--|--|
|                               | Afghanistan, Khowst |     |                   |     |                   |     |                   |     | Qatar, Al Udeid   |     |                   |     | UAE, Al Dhafra    |     |                   |     | Iraq, Balad |  |  |  |
|                               | PM <sub>10</sub>    |     | PM <sub>2.5</sub> |     | PM <sub>10</sub>  |     | PM <sub>2.5</sub> |     | PM <sub>10</sub>  |     | PM <sub>2.5</sub> |     | PM <sub>10</sub>  |     | PM <sub>2.5</sub> |     |             |  |  |  |
|                               | Conc                | Unc | Conc              | Unc | Conc              | Unc | Conc              | Unc | Conc              | Unc | Conc              | Unc | Conc              | Unc | Conc              | Unc |             |  |  |  |
| %                             |                     | %   |                   | %   |                   | %   |                   | %   |                   | %   |                   | %   |                   | %   |                   |     |             |  |  |  |
| <b>Majors</b>                 |                     |     |                   |     |                   |     |                   |     |                   |     |                   |     |                   |     |                   |     |             |  |  |  |
| Si                            | 14.263 ± 0.098      |     | 17.287 ± 0.133    |     | 10.831 ± 0.076    |     | 13.351 ± 0.103    |     | 3.470 ± 0.030     |     | 5.239 ± 0.058     |     | 9.393 ± 0.066     |     | 10.878 ± 0.098    |     |             |  |  |  |
| Ti                            | 0.529 ± 0.002       |     | 0.690 ± 0.005     |     | 0.381 ± 0.002     |     | 0.438 ± 0.003     |     | 0.090 ± 0.001     |     | 0.135 ± 0.004     |     | 0.329 ± 0.001     |     | 0.336 ± 0.005     |     |             |  |  |  |
| Al                            | 5.254 ± 0.038       |     | 7.989 ± 0.071     |     | 4.375 ± 0.034     |     | 5.641 ± 0.052     |     | 1.380 ± 0.016     |     | 2.117 ± 0.036     |     | 3.451 ± 0.026     |     | 4.348 ± 0.054     |     |             |  |  |  |
| Fe                            | 6.357 ± 0.015       |     | 7.184 ± 0.023     |     | 4.446 ± 0.012     |     | 4.976 ± 0.017     |     | 1.233 ± 0.005     |     | 1.706 ± 0.012     |     | 3.656 ± 0.009     |     | 3.644 ± 0.018     |     |             |  |  |  |
| Mg                            | 2.083 ± 0.041       |     | 3.291 ± 0.156     |     | 2.668 ± 0.055     |     | 3.487 ± 0.131     |     | 3.374 ± 0.074     |     | 3.823 ± 0.177     |     | 1.674 ± 0.039     |     | 2.323 ± 0.193     |     |             |  |  |  |
| Ca                            | 4.328 ± 0.010       |     | 3.713 ± 0.012     |     | 11.592 ± 0.025    |     | 7.026 ± 0.018     |     | 21.264 ± 0.046    |     | 23.176 ± 0.053    |     | 9.733 ± 0.021     |     | 8.564 ± 0.024     |     |             |  |  |  |
| K                             | 1.603 ± 0.005       |     | 2.257 ± 0.009     |     | 1.391 ± 0.004     |     | 1.486 ± 0.007     |     | 0.679 ± 0.003     |     | 0.867 ± 0.007     |     | 1.366 ± 0.004     |     | 1.448 ± 0.009     |     |             |  |  |  |
| <b>Traces</b>                 |                     |     |                   |     |                   |     |                   |     |                   |     |                   |     |                   |     |                   |     |             |  |  |  |
| As                            | 0.00073 ± 0.00003   |     | 0.00089 ± 0.00042 |     | 0.00078 ± 0.00007 |     | 0.00091 ± 0.00009 |     | 0.00064 ± 0.00006 |     | 0.00120 ± 0.00003 |     | 0.00039 ± 0.00005 |     | 0.00148 ± 0.00025 |     |             |  |  |  |
| Be                            | 0.00008 ± 0.00001   |     | 0.00044 ± 0.00005 |     | 0.00011 ± 0.00000 |     | 0.00035 ± 0.00002 |     | 0.00016 ± 0.00001 |     | 0.00050 ± 0.00005 |     | 0.00009 ± 0.00001 |     | 0.00059 ± 0.00007 |     |             |  |  |  |
| Cd                            | 0.00003 ± 0.00000   |     | 0.00018 ± 0.00001 |     | 0.00005 ± 0.00000 |     | 0.00014 ± 0.00002 |     | 0.00006 ± 0.00000 |     | 0.00020 ± 0.00001 |     | 0.00003 ± 0.00000 |     | 0.00024 ± 0.00001 |     |             |  |  |  |
| Cr                            | 0.00001 ± 0.00013   |     | 0.00004 ± 0.00022 |     | 0.00002 ± 0.00022 |     | 0.00003 ± 0.00026 |     | 0.00001 ± 0.00024 |     | 0.00004 ± 0.00046 |     | 0.00001 ± 0.00008 |     | 0.00004 ± 0.00009 |     |             |  |  |  |
| Hg                            | 0.00003 ± 0.00000   |     | 0.00018 ± 0.00002 |     | 0.00005 ± 0.00001 |     | 0.00014 ± 0.00002 |     | 0.00006 ± 0.00000 |     | 0.00020 ± 0.00001 |     | 0.00003 ± 0.00000 |     | 0.00024 ± 0.00002 |     |             |  |  |  |
| Mn                            | 0.08249 ± 0.00054   |     | 0.14103 ± 0.00073 |     | 0.06167 ± 0.00026 |     | 0.08286 ± 0.00041 |     | 0.02683 ± 0.00012 |     | 0.03527 ± 0.00027 |     | 0.03396 ± 0.00022 |     | 0.04964 ± 0.00016 |     |             |  |  |  |
| Ni                            | 0.02201 ± 0.00024   |     | 0.03481 ± 0.00035 |     | 0.01101 ± 0.00013 |     | 0.01416 ± 0.00005 |     | 0.00701 ± 0.00018 |     | 0.00988 ± 0.00024 |     | 0.00676 ± 0.00004 |     | 0.01074 ± 0.00008 |     |             |  |  |  |
| Pb                            | 0.00146 ± 0.00001   |     | 0.00291 ± 0.00002 |     | 0.00182 ± 0.00002 |     | 0.00234 ± 0.00001 |     | 0.00060 ± 0.00000 |     | 0.00080 ± 0.00000 |     | 0.00057 ± 0.00000 |     | 0.00122 ± 0.00001 |     |             |  |  |  |
| Sb                            | 0.00059 ± 0.00000   |     | 0.00090 ± 0.00000 |     | 0.00011 ± 0.00000 |     | 0.00035 ± 0.00001 |     | 0.00016 ± 0.00000 |     | 0.00050 ± 0.00001 |     | 0.00009 ± 0.00000 |     | 0.00059 ± 0.00001 |     |             |  |  |  |
| Sr                            | 0.01073 ± 0.00005   |     | 0.01476 ± 0.00027 |     | 0.03577 ± 0.00007 |     | 0.02960 ± 0.00031 |     | 0.12683 ± 0.00098 |     | 0.14810 ± 0.00149 |     | 0.03075 ± 0.00012 |     | 0.04727 ± 0.00026 |     |             |  |  |  |
| V                             | 0.00443 ± 0.00002   |     | 0.00895 ± 0.00026 |     | 0.00704 ± 0.00007 |     | 0.00943 ± 0.00014 |     | 0.00279 ± 0.00004 |     | 0.00407 ± 0.00008 |     | 0.00372 ± 0.00008 |     | 0.00705 ± 0.00019 |     |             |  |  |  |
| Zn                            | 0.01294 ± 0.00013   |     | 0.04139 ± 0.00030 |     | 0.01603 ± 0.00023 |     | 0.03159 ± 0.00043 |     | 0.01721 ± 0.00028 |     | 0.04168 ± 0.00072 |     | 0.01000 ± 0.00005 |     | 0.05178 ± 0.00046 |     |             |  |  |  |
| <b>Ions</b>                   |                     |     |                   |     |                   |     |                   |     |                   |     |                   |     |                   |     |                   |     |             |  |  |  |
| Cl <sup>-</sup>               | 0.029 ± 0.017       |     | 0.072 ± 0.079     |     | 0.021 ± 0.024     |     | 0.038 ± 0.063     |     | 0.243 ± 0.038     |     | 0.357 ± 0.092     |     | 2.145 ± 0.156     |     | 1.784 ± 0.169     |     |             |  |  |  |
| NO <sub>3</sub> <sup>-</sup>  | 0.014 ± 0.017       |     | 0.031 ± 0.078     |     | 0.011 ± 0.024     |     | 0.090 ± 0.063     |     | 0.026 ± 0.034     |     | 0.000 ± 0.088     |     | 0.161 ± 0.026     |     | 0.138 ± 0.106     |     |             |  |  |  |
| PO <sub>4</sub> <sup>3-</sup> | 0.000 ± 0.000       |     | 0.000 ± 0.000     |     | 0.000 ± 0.000     |     | 0.000 ± 0.000     |     | 0.000 ± 0.000     |     | 0.000 ± 0.000     |     | 0.000 ± 0.000     |     | 0.000 ± 0.000     |     |             |  |  |  |
| SO <sub>4</sub> <sup>2-</sup> | 0.239 ± 0.024       |     | 0.342 ± 0.082     |     | 0.226 ± 0.029     |     | 0.173 ± 0.064     |     | 1.584 ± 0.118     |     | 1.490 ± 0.139     |     | 1.119 ± 0.082     |     | 1.783 ± 0.167     |     |             |  |  |  |
| NH <sub>4</sub> <sup>+</sup>  | 0.030 ± 0.018       |     | 0.084 ± 0.080     |     | 0.044 ± 0.026     |     | 0.093 ± 0.065     |     | 0.040 ± 0.035     |     | 0.071 ± 0.089     |     | 0.037 ± 0.019     |     | 0.139 ± 0.108     |     |             |  |  |  |
| Ca <sup>2+</sup>              | 5.192 ± 0.372       |     | 3.316 ± 0.244     |     | 12.403 ± 0.898    |     | 6.979 ± 0.510     |     | 13.203 ± 0.953    |     | 20.539 ± 1.498    |     | 13.934 ± 1.000    |     | 10.719 ± 0.789    |     |             |  |  |  |
| K <sup>+</sup>                | 0.124 ± 0.009       |     | 0.229 ± 0.018     |     | 0.142 ± 0.011     |     | 0.260 ± 0.020     |     | 0.070 ± 0.006     |     | 0.119 ± 0.012     |     | 0.202 ± 0.015     |     | 0.282 ± 0.023     |     |             |  |  |  |
| Mg <sup>2+</sup>              | 0.256 ± 0.018       |     | 0.248 ± 0.018     |     | 0.491 ± 0.035     |     | 0.931 ± 0.067     |     | 1.942 ± 0.139     |     | 3.369 ± 0.243     |     | 0.611 ± 0.043     |     | 0.945 ± 0.069     |     |             |  |  |  |
| Na <sup>+</sup>               | 0.035 ± 0.003       |     | 0.047 ± 0.006     |     | 0.021 ± 0.002     |     | 0.052 ± 0.006     |     | 0.145 ± 0.011     |     | 0.205 ± 0.017     |     | 0.223 ± 0.017     |     | 0.168 ± 0.014     |     |             |  |  |  |



Supplement S4.1 - Chemical Concentrations (mass %) of Grab Soil Samples Re-suspended onto Filters, for PM<sub>10</sub> and PM<sub>2.5</sub> Fractions

| Sample #                      | S2007                       |     |                   |     | S2008                    |     |                   |     | S2009                  |     |                   |     | S2010             |     |                   |     |
|-------------------------------|-----------------------------|-----|-------------------|-----|--------------------------|-----|-------------------|-----|------------------------|-----|-------------------|-----|-------------------|-----|-------------------|-----|
|                               | Iraq, Baghdad, Camp Victory |     |                   |     | Iraq, Tallil, Camp Adder |     |                   |     | Iraq, Tikrit, Speicher |     |                   |     | Iraq, Taji        |     |                   |     |
|                               | PM <sub>10</sub>            |     | PM <sub>2.5</sub> |     | PM <sub>10</sub>         |     | PM <sub>2.5</sub> |     | PM <sub>10</sub>       |     | PM <sub>2.5</sub> |     | PM <sub>10</sub>  |     | PM <sub>2.5</sub> |     |
|                               | Conc                        | Unc | Conc              | Unc | Conc                     | Unc | Conc              | Unc | Conc                   | Unc | Conc              | Unc | Conc              | Unc | Conc              | Unc |
| %                             | %                           | %   | %                 | %   | %                        | %   | %                 | %   | %                      | %   | %                 | %   | %                 | %   | %                 | %   |
| <b>Majors</b>                 |                             |     |                   |     |                          |     |                   |     |                        |     |                   |     |                   |     |                   |     |
| Si                            | 10.093 ± 0.071              |     | 12.120 ± 0.092    |     | 7.208 ± 0.056            |     | 10.135 ± 0.095    |     | 10.050 ± 0.072         |     | 12.654 ± 0.101    |     | 7.185 ± 0.052     |     | 6.528 ± 0.135     |     |
| Ti                            | 0.366 ± 0.001               |     | 0.384 ± 0.003     |     | 0.257 ± 0.002            |     | 0.364 ± 0.005     |     | 0.354 ± 0.002          |     | 0.405 ± 0.004     |     | 0.268 ± 0.001     |     | 0.225 ± 0.014     |     |
| Al                            | 4.044 ± 0.031               |     | 5.119 ± 0.045     |     | 2.569 ± 0.025            |     | 3.818 ± 0.052     |     | 4.152 ± 0.033          |     | 5.311 ± 0.051     |     | 2.557 ± 0.021     |     | 2.712 ± 0.102     |     |
| Fe                            | 4.936 ± 0.013               |     | 5.342 ± 0.016     |     | 2.236 ± 0.008            |     | 3.125 ± 0.017     |     | 4.217 ± 0.011          |     | 4.769 ± 0.017     |     | 3.071 ± 0.008     |     | 2.088 ± 0.037     |     |
| Mg                            | 2.227 ± 0.048               |     | 2.913 ± 0.105     |     | 1.489 ± 0.069            |     | 2.373 ± 0.205     |     | 1.775 ± 0.051          |     | 2.555 ± 0.136     |     | 1.464 ± 0.044     |     | 1.338 ± 0.544     |     |
| Ca                            | 11.567 ± 0.025              |     | 9.329 ± 0.022     |     | 17.632 ± 0.039           |     | 16.919 ± 0.041    |     | 12.418 ± 0.027         |     | 10.171 ± 0.025    |     | 14.796 ± 0.032    |     | 15.677 ± 0.051    |     |
| K                             | 1.147 ± 0.004               |     | 1.183 ± 0.005     |     | 0.932 ± 0.004            |     | 1.180 ± 0.009     |     | 1.362 ± 0.004          |     | 1.512 ± 0.007     |     | 1.032 ± 0.004     |     | 0.768 ± 0.019     |     |
| <b>Traces</b>                 |                             |     |                   |     |                          |     |                   |     |                        |     |                   |     |                   |     |                   |     |
| As                            | 0.00115 ± 0.00007           |     | 0.00140 ± 0.00010 |     | 0.00120 ± 0.00003        |     | 0.00174 ± 0.00019 |     | 0.00097 ± 0.00007      |     | 0.00152 ± 0.00012 |     | 0.00073 ± 0.00008 |     | 0.00360 ± 0.00112 |     |
| Be                            | 0.00010 ± 0.00003           |     | 0.00028 ± 0.00002 |     | 0.00020 ± 0.00004        |     | 0.00063 ± 0.00002 |     | 0.00013 ± 0.00002      |     | 0.00039 ± 0.00004 |     | 0.00011 ± 0.00003 |     | 0.00180 ± 0.00015 |     |
| Cd                            | 0.00004 ± 0.00001           |     | 0.00011 ± 0.00001 |     | 0.00008 ± 0.00000        |     | 0.00025 ± 0.00001 |     | 0.00006 ± 0.00000      |     | 0.00016 ± 0.00001 |     | 0.00006 ± 0.00000 |     | 0.00072 ± 0.00003 |     |
| Cr                            | 0.00002 ± 0.00006           |     | 0.00002 ± 0.00002 |     | 0.00002 ± 0.00012        |     | 0.00004 ± 0.00026 |     | 0.00001 ± 0.00012      |     | 0.00003 ± 0.00020 |     | 0.00001 ± 0.00006 |     | 0.00008 ± 0.00036 |     |
| Hg                            | 0.00004 ± 0.00001           |     | 0.00011 ± 0.00002 |     | 0.00008 ± 0.00001        |     | 0.00025 ± 0.00002 |     | 0.00005 ± 0.00000      |     | 0.00016 ± 0.00001 |     | 0.00004 ± 0.00000 |     | 0.00072 ± 0.00008 |     |
| Mn                            | 0.07003 ± 0.00038           |     | 0.08213 ± 0.00113 |     | 0.05141 ± 0.00059        |     | 0.05392 ± 0.00078 |     | 0.04960 ± 0.00039      |     | 0.06667 ± 0.00037 |     | 0.04770 ± 0.00043 |     | 0.05086 ± 0.00026 |     |
| Ni                            | 0.01801 ± 0.00013           |     | 0.02146 ± 0.00017 |     | 0.00665 ± 0.00012        |     | 0.00914 ± 0.00023 |     | 0.01112 ± 0.00006      |     | 0.01503 ± 0.00013 |     | 0.01038 ± 0.00013 |     | 0.01007 ± 0.00030 |     |
| Pb                            | 0.00122 ± 0.00000           |     | 0.00144 ± 0.00002 |     | 0.00132 ± 0.00001        |     | 0.00175 ± 0.00003 |     | 0.00161 ± 0.00000      |     | 0.00233 ± 0.00004 |     | 0.00208 ± 0.00001 |     | 0.00314 ± 0.00003 |     |
| Sb                            | 0.00010 ± 0.00000           |     | 0.00028 ± 0.00001 |     | 0.00020 ± 0.00000        |     | 0.00063 ± 0.00001 |     | 0.00014 ± 0.00000      |     | 0.00039 ± 0.00000 |     | 0.00011 ± 0.00000 |     | 0.00180 ± 0.00003 |     |
| Sr                            | 0.04202 ± 0.00087           |     | 0.04146 ± 0.00025 |     | 0.12618 ± 0.00055        |     | 0.09418 ± 0.00028 |     | 0.02068 ± 0.00014      |     | 0.02201 ± 0.00011 |     | 0.05433 ± 0.00017 |     | 0.07410 ± 0.00009 |     |
| V                             | 0.00780 ± 0.00002           |     | 0.01001 ± 0.00011 |     | 0.00713 ± 0.00007        |     | 0.01038 ± 0.00018 |     | 0.00637 ± 0.00006      |     | 0.00936 ± 0.00024 |     | 0.00459 ± 0.00005 |     | 0.00542 ± 0.00020 |     |
| Zn                            | 0.01285 ± 0.00006           |     | 0.02090 ± 0.00027 |     | 0.02633 ± 0.00033        |     | 0.04456 ± 0.00107 |     | 0.01481 ± 0.00025      |     | 0.03066 ± 0.00023 |     | 0.01577 ± 0.00015 |     | 0.09281 ± 0.00195 |     |
| <b>Ions</b>                   |                             |     |                   |     |                          |     |                   |     |                        |     |                   |     |                   |     |                   |     |
| CL <sup>-</sup>               | 1.292 ± 0.096               |     | 1.150 ± 0.097     |     | 0.117 ± 0.043            |     | 0.111 ± 0.112     |     | 0.104 ± 0.028          |     | 0.107 ± 0.070     |     | 3.260 ± 0.239     |     | 2.237 ± 0.373     |     |
| NO <sub>3</sub> <sup>-</sup>  | 0.055 ± 0.022               |     | 0.054 ± 0.050     |     | 0.012 ± 0.042            |     | 0.000 ± 0.112     |     | 0.089 ± 0.029          |     | 0.106 ± 0.070     |     | 0.155 ± 0.030     |     | 0.141 ± 0.318     |     |
| PO <sub>4</sub> <sup>3-</sup> | 0.000 ± 0.000               |     | 0.000 ± 0.000     |     | 0.000 ± 0.000            |     | 0.000 ± 0.000     |     | 0.000 ± 0.000          |     | 0.000 ± 0.000     |     | 0.000 ± 0.000     |     | 0.000 ± 0.000     |     |
| SO <sub>4</sub> <sup>2-</sup> | 0.841 ± 0.064               |     | 0.696 ± 0.070     |     | 4.133 ± 0.297            |     | 1.561 ± 0.159     |     | 2.350 ± 0.168          |     | 2.603 ± 0.199     |     | 7.898 ± 0.567     |     | 10.249 ± 0.945    |     |
| NH <sub>4</sub> <sup>+</sup>  | 0.050 ± 0.023               |     | 0.091 ± 0.052     |     | 0.060 ± 0.043            |     | 0.138 ± 0.114     |     | 0.047 ± 0.028          |     | 0.115 ± 0.072     |     | 0.039 ± 0.025     |     | 0.451 ± 0.328     |     |
| Ca <sup>2+</sup>              | 14.865 ± 1.071              |     | 9.874 ± 0.711     |     | 24.524 ± 1.760           |     | 7.304 ± 0.540     |     | 14.071 ± 1.004         |     | 9.810 ± 0.712     |     | 16.362 ± 1.185    |     | 14.656 ± 1.291    |     |
| K <sup>+</sup>                | 0.160 ± 0.012               |     | 0.213 ± 0.016     |     | 0.127 ± 0.010            |     | 0.088 ± 0.013     |     | 0.127 ± 0.009          |     | 0.218 ± 0.017     |     | 0.090 ± 0.007     |     | 0.152 ± 0.034     |     |
| Mg <sup>2+</sup>              | 0.639 ± 0.046               |     | 1.121 ± 0.080     |     | 0.482 ± 0.034            |     | 0.332 ± 0.025     |     | 0.132 ± 0.009          |     | 0.253 ± 0.018     |     | 0.524 ± 0.038     |     | 0.654 ± 0.058     |     |
| Na <sup>+</sup>               | 0.534 ± 0.040               |     | 0.457 ± 0.035     |     | 0.103 ± 0.008            |     | 0.067 ± 0.008     |     | 0.062 ± 0.005          |     | 0.084 ± 0.008     |     | 0.222 ± 0.017     |     | 0.169 ± 0.024     |     |

Supplement S4.1 - Chemical Concentrations (mass %) of Grab Soil Samples Re-suspended onto Filters, for PM<sub>10</sub> and PM<sub>2.5</sub> Fractions

| Sample #                      | S2011             |     |                   |     | S2012                        |     |                   |     | S2013                              |     |                   |     | S2014                           |     |                   |     |
|-------------------------------|-------------------|-----|-------------------|-----|------------------------------|-----|-------------------|-----|------------------------------------|-----|-------------------|-----|---------------------------------|-----|-------------------|-----|
|                               | Iraq, Al Asad     |     |                   |     | Kuwait, North, Camp Buehring |     |                   |     | Kuwait, Central, Camp Ali Al Salem |     |                   |     | Kuwait, Coastal, Ash Shu Ayabah |     |                   |     |
|                               | PM <sub>10</sub>  |     | PM <sub>2.5</sub> |     | PM <sub>10</sub>             |     | PM <sub>2.5</sub> |     | PM <sub>10</sub>                   |     | PM <sub>2.5</sub> |     | PM <sub>10</sub>                |     | PM <sub>2.5</sub> |     |
|                               | Conc              | Unc | Conc              | Unc | Conc                         | Unc | Conc              | Unc | Conc                               | Unc | Conc              | Unc | Conc                            | Unc | Conc              | Unc |
| %                             |                   | %   |                   | %   |                              | %   |                   | %   |                                    | %   |                   | %   |                                 | %   |                   |     |
| <b>Majors</b>                 |                   |     |                   |     |                              |     |                   |     |                                    |     |                   |     |                                 |     |                   |     |
| Si                            | 2.323 ± 0.020     |     | 3.918 ± 0.074     |     | 11.066 ± 0.077               |     | 13.782 ± 0.100    |     | 10.352 ± 0.072                     |     | 12.695 ± 0.097    |     | 9.465 ± 0.066                   |     | 11.832 ± 0.090    |     |
| Ti                            | 0.092 ± 0.001     |     | 0.168 ± 0.007     |     | 0.368 ± 0.001                |     | 0.428 ± 0.003     |     | 0.287 ± 0.001                      |     | 0.319 ± 0.003     |     | 0.305 ± 0.001                   |     | 0.352 ± 0.003     |     |
| Al                            | 1.095 ± 0.012     |     | 2.036 ± 0.057     |     | 4.252 ± 0.032                |     | 5.638 ± 0.046     |     | 4.222 ± 0.031                      |     | 5.319 ± 0.047     |     | 3.474 ± 0.026                   |     | 4.674 ± 0.042     |     |
| Fe                            | 1.007 ± 0.004     |     | 1.543 ± 0.020     |     | 4.462 ± 0.011                |     | 5.023 ± 0.015     |     | 3.655 ± 0.009                      |     | 3.930 ± 0.013     |     | 3.619 ± 0.009                   |     | 3.954 ± 0.013     |     |
| Mg                            | 3.393 ± 0.061     |     | 4.765 ± 0.317     |     | 2.282 ± 0.043                |     | 3.021 ± 0.090     |     | 1.665 ± 0.037                      |     | 2.338 ± 0.107     |     | 2.168 ± 0.041                   |     | 2.965 ± 0.105     |     |
| Ca                            | 16.963 ± 0.037    |     | 17.258 ± 0.045    |     | 11.079 ± 0.024               |     | 8.371 ± 0.020     |     | 13.265 ± 0.029                     |     | 10.044 ± 0.024    |     | 13.581 ± 0.029                  |     | 12.950 ± 0.030    |     |
| K                             | 0.692 ± 0.003     |     | 0.964 ± 0.012     |     | 1.401 ± 0.004                |     | 1.547 ± 0.006     |     | 1.262 ± 0.004                      |     | 1.321 ± 0.006     |     | 1.265 ± 0.004                   |     | 1.354 ± 0.006     |     |
| <b>Traces</b>                 |                   |     |                   |     |                              |     |                   |     |                                    |     |                   |     |                                 |     |                   |     |
| As                            | 0.00022 ± 0.00001 |     | 0.00190 ± 0.00012 |     | 0.00117 ± 0.00003            |     | 0.00137 ± 0.00011 |     | 0.00073 ± 0.00001                  |     | 0.00063 ± 0.00004 |     | 0.00086 ± 0.00003               |     | 0.00099 ± 0.00011 |     |
| Be                            | 0.00011 ± 0.00001 |     | 0.00095 ± 0.00007 |     | 0.00008 ± 0.00002            |     | 0.00023 ± 0.00002 |     | 0.00009 ± 0.00000                  |     | 0.00030 ± 0.00006 |     | 0.00008 ± 0.00001               |     | 0.00028 ± 0.00001 |     |
| Cd                            | 0.00004 ± 0.00001 |     | 0.00038 ± 0.00004 |     | 0.00003 ± 0.00000            |     | 0.00009 ± 0.00001 |     | 0.00009 ± 0.00001                  |     | 0.00013 ± 0.00003 |     | 0.00005 ± 0.00000               |     | 0.00011 ± 0.00002 |     |
| Cr                            | 0.00001 ± 0.00004 |     | 0.00006 ± 0.00603 |     | 0.00002 ± 0.00009            |     | 0.00003 ± 0.00018 |     | 0.00001 ± 0.00007                  |     | 0.00002 ± 0.00015 |     | 0.00001 ± 0.00005               |     | 0.00002 ± 0.00007 |     |
| Hg                            | 0.00004 ± 0.00001 |     | 0.00038 ± 0.00003 |     | 0.00003 ± 0.00000            |     | 0.00009 ± 0.00001 |     | 0.00003 ± 0.00000                  |     | 0.00012 ± 0.00000 |     | 0.00003 ± 0.00000               |     | 0.00011 ± 0.00001 |     |
| Mn                            | 0.01883 ± 0.00006 |     | 0.02449 ± 0.00012 |     | 0.06290 ± 0.00062            |     | 0.08315 ± 0.00060 |     | 0.05207 ± 0.00023                  |     | 0.06058 ± 0.00004 |     | 0.04699 ± 0.00089               |     | 0.05458 ± 0.00038 |     |
| Ni                            | 0.00268 ± 0.00002 |     | 0.00540 ± 0.00008 |     | 0.01372 ± 0.00005            |     | 0.01721 ± 0.00018 |     | 0.00720 ± 0.00002                  |     | 0.00938 ± 0.00006 |     | 0.01216 ± 0.00001               |     | 0.01451 ± 0.00009 |     |
| Pb                            | 0.00054 ± 0.00001 |     | 0.00126 ± 0.00002 |     | 0.00125 ± 0.00001            |     | 0.00157 ± 0.00001 |     | 0.00149 ± 0.00001                  |     | 0.00184 ± 0.00001 |     | 0.00177 ± 0.00001               |     | 0.00227 ± 0.00001 |     |
| Sb                            | 0.00011 ± 0.00003 |     | 0.00095 ± 0.00000 |     | 0.00008 ± 0.00000            |     | 0.00028 ± 0.00001 |     | 0.00469 ± 0.00002                  |     | 0.00474 ± 0.00003 |     | 0.00024 ± 0.00000               |     | 0.00029 ± 0.00000 |     |
| Sr                            | 0.03528 ± 0.00018 |     | 0.04905 ± 0.00002 |     | 0.05353 ± 0.00031            |     | 0.04393 ± 0.00013 |     | 0.02591 ± 0.00009                  |     | 0.02837 ± 0.00012 |     | 0.03289 ± 0.00010               |     | 0.03795 ± 0.00030 |     |
| V                             | 0.00324 ± 0.00005 |     | 0.00498 ± 0.00027 |     | 0.00746 ± 0.00003            |     | 0.00960 ± 0.00003 |     | 0.00781 ± 0.00010                  |     | 0.00887 ± 0.00014 |     | 0.00714 ± 0.00003               |     | 0.00884 ± 0.00014 |     |
| Zn                            | 0.00733 ± 0.00017 |     | 0.21103 ± 0.00254 |     | 0.00923 ± 0.00013            |     | 0.01848 ± 0.00027 |     | 0.02311 ± 0.00025                  |     | 0.03930 ± 0.00018 |     | 0.01635 ± 0.00003               |     | 0.03337 ± 0.00031 |     |
| <b>Ions</b>                   |                   |     |                   |     |                              |     |                   |     |                                    |     |                   |     |                                 |     |                   |     |
| CL <sup>-</sup>               | 0.688 ± 0.056     |     | 1.073 ± 0.187     |     | 0.064 ± 0.018                |     | 0.067 ± 0.040     |     | 0.110 ± 0.019                      |     | 0.099 ± 0.053     |     | 0.031 ± 0.017                   |     | 0.037 ± 0.049     |     |
| NO <sub>3</sub> <sup>-</sup>  | 0.042 ± 0.024     |     | 0.084 ± 0.168     |     | 0.018 ± 0.018                |     | 0.014 ± 0.040     |     | 0.080 ± 0.020                      |     | 0.060 ± 0.053     |     | 0.014 ± 0.017                   |     | 0.013 ± 0.049     |     |
| PO <sub>4</sub> <sup>3-</sup> | 0.000 ± 0.000     |     | 0.000 ± 0.000     |     | 0.000 ± 0.000                |     | 0.000 ± 0.000     |     | 0.000 ± 0.000                      |     | 0.000 ± 0.000     |     | 0.000 ± 0.000                   |     | 0.000 ± 0.000     |     |
| SO <sub>4</sub> <sup>2-</sup> | 1.470 ± 0.109     |     | 2.057 ± 0.229     |     | 1.528 ± 0.109                |     | 0.595 ± 0.058     |     | 0.466 ± 0.037                      |     | 0.567 ± 0.067     |     | 0.799 ± 0.060                   |     | 0.769 ± 0.074     |     |
| NH <sub>4</sub> <sup>+</sup>  | 0.042 ± 0.025     |     | 0.226 ± 0.172     |     | 0.033 ± 0.019                |     | 0.068 ± 0.042     |     | 0.081 ± 0.022                      |     | 0.111 ± 0.057     |     | 0.040 ± 0.018                   |     | 0.078 ± 0.051     |     |
| Ca <sup>2+</sup>              | 11.161 ± 0.817    |     | 31.589 ± 2.409    |     | 13.298 ± 0.948               |     | 7.545 ± 0.543     |     | 14.778 ± 1.054                     |     | 7.640 ± 0.552     |     | 11.464 ± 0.830                  |     | 12.236 ± 0.891    |     |
| K <sup>+</sup>                | 0.086 ± 0.007     |     | 0.222 ± 0.024     |     | 0.202 ± 0.014                |     | 0.264 ± 0.019     |     | 0.116 ± 0.008                      |     | 0.133 ± 0.011     |     | 0.105 ± 0.008                   |     | 0.128 ± 0.010     |     |
| Mg <sup>2+</sup>              | 3.348 ± 0.242     |     | 13.953 ± 1.052    |     | 0.339 ± 0.024                |     | 0.433 ± 0.031     |     | 0.189 ± 0.013                      |     | 0.284 ± 0.020     |     | 0.223 ± 0.016                   |     | 0.784 ± 0.056     |     |
| Na <sup>+</sup>               | 0.144 ± 0.011     |     | 0.202 ± 0.019     |     | 0.043 ± 0.003                |     | 0.042 ± 0.004     |     | 0.066 ± 0.005                      |     | 0.057 ± 0.005     |     | 0.016 ± 0.002                   |     | 0.021 ± 0.003     |     |

Supplement S4.1 - Chemical Concentrations (mass %) of Grab Soil Samples Re-suspended onto Filters, for PM<sub>10</sub> and PM<sub>2.5</sub> Fractions

| Sample #                      | S2015                       |     |                   |     | S2016                         |     |                   |     | S2017                  |     |                    |     | S3003                         |     |                   |     |
|-------------------------------|-----------------------------|-----|-------------------|-----|-------------------------------|-----|-------------------|-----|------------------------|-----|--------------------|-----|-------------------------------|-----|-------------------|-----|
|                               | Kuwait, South, Camp Arifjan |     |                   |     | Afghanistan, Camp Leatherneck |     |                   |     | Kuwait, Ash Shu Ayabah |     |                    |     | USA, YPG, Yuma AZ, Area 3835Z |     |                   |     |
|                               | PM <sub>10</sub>            |     | PM <sub>2.5</sub> |     | PM <sub>10</sub>              |     | PM <sub>2.5</sub> |     | PM <sub>10</sub>       |     | PM <sub>2.5</sub>  |     | PM <sub>10</sub>              |     | PM <sub>2.5</sub> |     |
|                               | Conc                        | Unc | Conc              | Unc | Conc                          | Unc | Conc              | Unc | Conc                   | Unc | Conc               | Unc | Conc                          | Unc | Conc              | Unc |
| %                             |                             | %   |                   | %   |                               | %   |                   | %   |                        | %   |                    | %   |                               | %   |                   |     |
| <b>Majors</b>                 |                             |     |                   |     |                               |     |                   |     |                        |     |                    |     |                               |     |                   |     |
| Si                            | 10.174 ± 0.071              |     | 12.260 ± 0.092    |     | 11.556 ± 0.027                |     | 14.603 ± 0.042    |     | 9.281 ± 0.027          |     | 12.744 ± 0.059     |     | 12.736 ± 0.035                |     | 16.144 ± 0.054    |     |
| Ti                            | 0.295 ± 0.001               |     | 0.332 ± 0.003     |     | 0.254 ± 0.003                 |     | 0.307 ± 0.006     |     | 0.207 ± 0.004          |     | 0.240 ± 0.009      |     | 0.224 ± 0.004                 |     | 0.247 ± 0.007     |     |
| Al                            | 3.561 ± 0.027               |     | 4.709 ± 0.042     |     | 3.884 ± 0.022                 |     | 5.338 ± 0.041     |     | 2.725 ± 0.025          |     | 3.903 ± 0.062      |     | 4.048 ± 0.031                 |     | 5.315 ± 0.054     |     |
| Fe                            | 3.190 ± 0.008               |     | 3.631 ± 0.012     |     | 3.710 ± 0.007                 |     | 4.311 ± 0.011     |     | 3.051 ± 0.007          |     | 3.736 ± 0.014      |     | 2.707 ± 0.007                 |     | 3.143 ± 0.010     |     |
| Mg                            | 2.159 ± 0.045               |     | 2.941 ± 0.103     |     | 0.968 ± 0.007                 |     | 1.562 ± 0.014     |     | 1.124 ± 0.008          |     | 1.961 ± 0.023      |     | 0.530 ± 0.009                 |     | 0.941 ± 0.017     |     |
| Ca                            | 12.613 ± 0.027              |     | 12.814 ± 0.029    |     | 6.162 ± 0.012                 |     | 4.132 ± 0.010     |     | 5.756 ± 0.012          |     | 5.311 ± 0.016      |     | 7.687 ± 0.015                 |     | 4.080 ± 0.012     |     |
| K                             | 1.309 ± 0.004               |     | 1.419 ± 0.006     |     | 1.566 ± 0.004                 |     | 1.958 ± 0.007     |     | 0.942 ± 0.004          |     | 1.177 ± 0.009      |     | 1.843 ± 0.006                 |     | 2.189 ± 0.010     |     |
| <b>Traces</b>                 |                             |     |                   |     |                               |     |                   |     |                        |     |                    |     |                               |     |                   |     |
| As                            | 0.00058 ± 0.00006           |     | 0.00054 ± 0.00011 |     | 0.00124 ± 0.00024             |     | 0.00181 ± 0.00075 |     | 0.00087 ± 0.00046      |     | 0.00051 ± 0.000210 |     | 0.00791 ± 0.00052             |     | 0.00161 ± 0.00127 |     |
| Be                            | 0.00009 ± 0.00001           |     | 0.00027 ± 0.00002 |     | 0.00011 ± 0.00006             |     | 0.00016 ± 0.00019 |     | 0.00011 ± 0.00011      |     | 0.00015 ± 0.00052  |     | 0.00012 ± 0.00013             |     | 0.00016 ± 0.00032 |     |
| Cd                            | 0.00004 ± 0.00000           |     | 0.00011 ± 0.00000 |     | 0.00001 ± 0.00006             |     | 0.00001 ± 0.00019 |     | 0.00005 ± 0.00011      |     | 0.00006 ± 0.00052  |     | 0.00007 ± 0.00013             |     | 0.00006 ± 0.00032 |     |
| Cr                            | 0.00001 ± 0.00001           |     | 0.00002 ± 0.00016 |     | 0.01455 ± 0.00014             |     | 0.02473 ± 0.00037 |     | 0.02657 ± 0.00023      |     | 0.08785 ± 0.00105  |     | 0.01386 ± 0.00026             |     | 0.04553 ± 0.00064 |     |
| Hg                            | 0.00004 ± 0.00000           |     | 0.00011 ± 0.00001 |     | 0.00002 ± 0.00012             |     | 0.00010 ± 0.00037 |     | 0.00015 ± 0.00023      |     | 0.00044 ± 0.00105  |     | -0.00014 ± 0.00026            |     | 0.00000 ± 0.00064 |     |
| Mn                            | 0.03936 ± 0.00006           |     | 0.04425 ± 0.00028 |     | 0.05816 ± 0.00024             |     | 0.08144 ± 0.00075 |     | 0.04822 ± 0.00046      |     | 0.06155 ± 0.00210  |     | 0.03995 ± 0.00052             |     | 0.05476 ± 0.00127 |     |
| Ni                            | 0.01255 ± 0.00005           |     | 0.01443 ± 0.00025 |     | 0.00534 ± 0.00024             |     | 0.00772 ± 0.00075 |     | 0.01189 ± 0.00046      |     | 0.01525 ± 0.00210  |     | 0.00263 ± 0.00052             |     | 0.00314 ± 0.00127 |     |
| Pb                            | 0.00182 ± 0.00001           |     | 0.00139 ± 0.00001 |     | 0.00177 ± 0.00006             |     | 0.00228 ± 0.00019 |     | 0.00373 ± 0.00011      |     | 0.00435 ± 0.00052  |     | 0.00173 ± 0.00013             |     | 0.00400 ± 0.00032 |     |
| Sb                            | 0.00017 ± 0.00000           |     | 0.00027 ± 0.00000 |     | 0.00008 ± 0.00006             |     | 0.00013 ± 0.00019 |     | 0.00024 ± 0.00011      |     | 0.00375 ± 0.00052  |     | 0.00017 ± 0.00013             |     | 0.00021 ± 0.00032 |     |
| Sr                            | 0.05793 ± 0.00007           |     | 0.07256 ± 0.00062 |     | 0.04076 ± 0.00020             |     | 0.03861 ± 0.00021 |     | 0.02441 ± 0.00013      |     | 0.02787 ± 0.00052  |     | 0.02627 ± 0.00015             |     | 0.02188 ± 0.00032 |     |
| V                             | 0.00613 ± 0.00007           |     | 0.00743 ± 0.00015 |     | 0.00549 ± 0.00007             |     | 0.00821 ± 0.00019 |     | 0.00770 ± 0.00011      |     | 0.00946 ± 0.00052  |     | 0.00554 ± 0.00013             |     | 0.00511 ± 0.00032 |     |
| Zn                            | 0.01051 ± 0.00005           |     | 0.01822 ± 0.00007 |     | 0.00730 ± 0.00024             |     | 0.01022 ± 0.00075 |     | 0.02809 ± 0.00046      |     | 0.04336 ± 0.00210  |     | 0.00799 ± 0.00052             |     | 0.01450 ± 0.00127 |     |
| <b>Ions</b>                   |                             |     |                   |     |                               |     |                   |     |                        |     |                    |     |                               |     |                   |     |
| CL <sup>-</sup>               | 0.070 ± 0.020               |     | 0.081 ± 0.048     |     | 0.126 ± 0.007                 |     | 0.183 ± 0.011     |     | 0.106 ± 0.006          |     | 0.198 ± 0.013      |     | 0.729 ± 0.038                 |     | 1.398 ± 0.074     |     |
| NO <sub>3</sub> <sup>-</sup>  | 0.042 ± 0.020               |     | 0.044 ± 0.048     |     | 0.024 ± 0.003                 |     | 0.054 ± 0.008     |     | 0.050 ± 0.005          |     | 0.126 ± 0.018      |     | 0.116 ± 0.010                 |     | 0.273 ± 0.030     |     |
| PO <sub>4</sub> <sup>3-</sup> | 0.000 ± 0.000               |     | 0.000 ± 0.000     |     | 0.024 ± 0.004                 |     | 0.057 ± 0.010     |     | 0.035 ± 0.005          |     | 0.000 ± 0.015      |     | 0.045 ± 0.007                 |     | 0.103 ± 0.025     |     |
| SO <sub>4</sub> <sup>2-</sup> | 1.461 ± 0.105               |     | 1.756 ± 0.134     |     | 0.298 ± 0.017                 |     | 0.398 ± 0.026     |     | 0.204 ± 0.013          |     | 0.413 ± 0.033      |     | 1.443 ± 0.076                 |     | 2.128 ± 0.123     |     |
| NH <sub>4</sub> <sup>+</sup>  | 0.043 ± 0.021               |     | 0.066 ± 0.049     |     | 0.021 ± 0.001                 |     | 0.045 ± 0.003     |     | 0.074 ± 0.004          |     | 0.157 ± 0.010      |     | 0.076 ± 0.005                 |     | 0.147 ± 0.010     |     |
| Ca <sup>2+</sup>              | 12.623 ± 0.904              |     | 12.088 ± 0.873    |     | 6.613 ± 0.327                 |     | 5.023 ± 0.340     |     | 6.757 ± 0.045          |     | 6.384 ± 0.183      |     | 7.012 ± 0.191                 |     | 7.888 ± 0.246     |     |
| K <sup>+</sup>                | 0.109 ± 0.008               |     | 0.125 ± 0.010     |     | 0.148 ± 0.029                 |     | 0.342 ± 0.090     |     | 0.098 ± 0.040          |     | 0.154 ± 0.183      |     | 0.234 ± 0.063                 |     | 0.318 ± 0.246     |     |
| Mg <sup>2+</sup>              | 0.254 ± 0.018               |     | 0.877 ± 0.063     |     | 0.282 ± 0.029                 |     | 0.734 ± 0.090     |     | 0.383 ± 0.040          |     | 0.726 ± 0.183      |     | 0.561 ± 0.063                 |     | 1.119 ± 0.246     |     |
| Na <sup>+</sup>               | 0.056 ± 0.004               |     | 0.053 ± 0.005     |     | 0.139 ± 0.029                 |     | 0.184 ± 0.090     |     | 0.018 ± 0.040          |     | 0.022 ± 0.183      |     | 0.124 ± 0.063                 |     | 0.236 ± 0.246     |     |

Supplement S4.1 - Chemical Concentrations (mass %) of Grab Soil Samples Re-suspended onto Filters, for PM<sub>10</sub> and PM<sub>2.5</sub> Fractions

| Sample #                      | S3004                           |     |                   |     | S3008                              |     |                   |     | S3011             |     |                   |     | S3016                           |     |                   |     |
|-------------------------------|---------------------------------|-----|-------------------|-----|------------------------------------|-----|-------------------|-----|-------------------|-----|-------------------|-----|---------------------------------|-----|-------------------|-----|
| Locality                      | USA, YPG, Yuma, AZ, Area 26500R |     |                   |     | USA, YPG, Yuma AZ, Roadrunner Site |     |                   |     | USA, Ft Carson CO |     |                   |     | USA, Dugway PG, Utah, Lima Site |     |                   |     |
| Particle Size                 | PM <sub>10</sub>                |     | PM <sub>2.5</sub> |     | PM <sub>10</sub>                   |     | PM <sub>2.5</sub> |     | PM <sub>10</sub>  |     | PM <sub>2.5</sub> |     | PM <sub>10</sub>                |     | PM <sub>2.5</sub> |     |
|                               | Conc                            | Unc | Conc              | Unc | Conc                               | Unc | Conc              | Unc | Conc              | Unc | Conc              | Unc | Conc                            | Unc | Conc              | Unc |
|                               | %                               | %   | %                 | %   | %                                  | %   | %                 | %   | %                 | %   | %                 | %   | %                               | %   | %                 | %   |
| <b>Majors</b>                 |                                 |     |                   |     |                                    |     |                   |     |                   |     |                   |     |                                 |     |                   |     |
| Si                            | 14.229 ± 0.032                  |     | 17.224 ± 0.047    |     | 13.278 ± 0.028                     |     | 18.331 ± 0.043    |     | 18.052 ± 0.043    |     | 18.959 ± 0.066    |     | 8.267 ± 0.024                   |     | 9.329 ± 0.035     |     |
| Ti                            | 0.255 ± 0.003                   |     | 0.299 ± 0.006     |     | 0.365 ± 0.003                      |     | 0.375 ± 0.005     |     | 0.399 ± 0.005     |     | 0.351 ± 0.009     |     | 0.140 ± 0.003                   |     | 0.130 ± 0.005     |     |
| Al                            | 4.975 ± 0.024                   |     | 6.195 ± 0.043     |     | 4.365 ± 0.019                      |     | 6.381 ± 0.035     |     | 6.250 ± 0.035     |     | 6.727 ± 0.064     |     | 1.882 ± 0.022                   |     | 2.508 ± 0.036     |     |
| Fe                            | 3.647 ± 0.007                   |     | 3.897 ± 0.010     |     | 4.009 ± 0.007                      |     | 4.458 ± 0.009     |     | 4.306 ± 0.009     |     | 3.954 ± 0.013     |     | 1.427 ± 0.004                   |     | 1.659 ± 0.006     |     |
| Mg                            | 0.420 ± 0.007                   |     | 0.658 ± 0.013     |     | 0.241 ± 0.005                      |     | 0.566 ± 0.010     |     | 0.224 ± 0.009     |     | 0.378 ± 0.019     |     | 1.187 ± 0.007                   |     | 1.852 ± 0.014     |     |
| Ca                            | 4.196 ± 0.008                   |     | 1.967 ± 0.006     |     | 3.075 ± 0.006                      |     | 2.239 ± 0.006     |     | 1.855 ± 0.005     |     | 1.594 ± 0.008     |     | 15.593 ± 0.028                  |     | 17.691 ± 0.032    |     |
| K                             | 2.077 ± 0.005                   |     | 2.353 ± 0.008     |     | 2.007 ± 0.005                      |     | 2.350 ± 0.007     |     | 2.505 ± 0.007     |     | 2.277 ± 0.011     |     | 1.164 ± 0.005                   |     | 1.297 ± 0.007     |     |
| <b>Traces</b>                 |                                 |     |                   |     |                                    |     |                   |     |                   |     |                   |     |                                 |     |                   |     |
| As                            | 0.00067 ± 0.00028               |     | 0.00053 ± 0.00075 |     | 0.00053 ± 0.00013                  |     | 0.00088 ± 0.00047 |     | 0.00094 ± 0.00050 |     | 0.00150 ± 0.00162 |     | 0.00450 ± 0.00031               |     | 0.00937 ± 0.00088 |     |
| Be                            | 0.00017 ± 0.00007               |     | 0.00020 ± 0.00019 |     | 0.00013 ± 0.00003                  |     | 0.00018 ± 0.00012 |     | 0.00016 ± 0.00012 |     | 0.00017 ± 0.00040 |     | 0.00006 ± 0.00008               |     | 0.00018 ± 0.00022 |     |
| Cd                            | 0.00003 ± 0.00007               |     | 0.00003 ± 0.00019 |     | 0.00004 ± 0.00003                  |     | 0.00004 ± 0.00012 |     | 0.00003 ± 0.00012 |     | 0.00003 ± 0.00040 |     | 0.00004 ± 0.00008               |     | 0.00000 ± 0.00022 |     |
| Cr                            | 0.01166 ± 0.00014               |     | 0.02794 ± 0.00038 |     | 0.00386 ± 0.00006                  |     | 0.01188 ± 0.00024 |     | 0.01368 ± 0.00025 |     | 0.03786 ± 0.00081 |     | 0.00682 ± 0.00015               |     | 0.03178 ± 0.00044 |     |
| Hg                            | 0.00000 ± 0.00014               |     | 0.00000 ± 0.00038 |     | 0.00003 ± 0.00006                  |     | 0.00008 ± 0.00024 |     | 0.00009 ± 0.00025 |     | 0.00032 ± 0.00081 |     | 0.00005 ± 0.00015               |     | 0.00003 ± 0.00044 |     |
| Mn                            | 0.05215 ± 0.00028               |     | 0.06545 ± 0.00075 |     | 0.03939 ± 0.00013                  |     | 0.05436 ± 0.00047 |     | 0.03786 ± 0.00050 |     | 0.03965 ± 0.00162 |     | 0.04938 ± 0.00031               |     | 0.11912 ± 0.00088 |     |
| Ni                            | 0.00236 ± 0.00028               |     | 0.00292 ± 0.00075 |     | 0.00181 ± 0.00013                  |     | 0.00260 ± 0.00047 |     | 0.00223 ± 0.00050 |     | 0.00252 ± 0.00162 |     | 0.00161 ± 0.00031               |     | 0.00846 ± 0.00088 |     |
| Pb                            | 0.00214 ± 0.00007               |     | 0.00269 ± 0.00019 |     | 0.00230 ± 0.00003                  |     | 0.00247 ± 0.00012 |     | 0.00259 ± 0.00012 |     | 0.00279 ± 0.00040 |     | 0.00181 ± 0.00008               |     | 0.00157 ± 0.00022 |     |
| Sb                            | 0.00007 ± 0.00007               |     | 0.00016 ± 0.00019 |     | 0.00004 ± 0.00003                  |     | 0.00007 ± 0.00012 |     | 0.00009 ± 0.00012 |     | 0.00027 ± 0.00040 |     | 0.00020 ± 0.00008               |     | 0.00011 ± 0.00022 |     |
| Sr                            | 0.01143 ± 0.00007               |     | 0.01155 ± 0.00019 |     | 0.00421 ± 0.00006                  |     | 0.00596 ± 0.00012 |     | 0.00637 ± 0.00012 |     | 0.00771 ± 0.00040 |     | 0.06904 ± 0.00028               |     | 0.00738 ± 0.00022 |     |
| V                             | 0.00403 ± 0.00008               |     | 0.00465 ± 0.00019 |     | 0.00395 ± 0.00003                  |     | 0.00422 ± 0.00012 |     | 0.00579 ± 0.00012 |     | 0.00604 ± 0.00040 |     | 0.00197 ± 0.00008               |     | 0.00664 ± 0.00022 |     |
| Zn                            | 0.00821 ± 0.00028               |     | 0.01892 ± 0.00075 |     | 0.00613 ± 0.00013                  |     | 0.00965 ± 0.00047 |     | 0.01124 ± 0.00050 |     | 0.01571 ± 0.00162 |     | 0.00528 ± 0.00031               |     | 0.01868 ± 0.00088 |     |
| <b>Ions</b>                   |                                 |     |                   |     |                                    |     |                   |     |                   |     |                   |     |                                 |     |                   |     |
| CL <sup>-</sup>               | 0.078 ± 0.005                   |     | 0.149 ± 0.009     |     | 0.078 ± 0.004                      |     | 0.428 ± 0.022     |     | 1.538 ± 0.078     |     | 2.523 ± 0.131     |     | 0.364 ± 0.019                   |     | 0.493 ± 0.026     |     |
| NO <sub>3</sub> <sup>-</sup>  | 0.038 ± 0.004                   |     | 0.073 ± 0.010     |     | 0.015 ± 0.002                      |     | 0.060 ± 0.006     |     | 0.145 ± 0.013     |     | 0.340 ± 0.035     |     | 0.023 ± 0.003                   |     | 0.045 ± 0.008     |     |
| PO <sub>4</sub> <sup>3-</sup> | 0.033 ± 0.004                   |     | 0.132 ± 0.014     |     | 0.034 ± 0.003                      |     | 0.123 ± 0.010     |     | 0.070 ± 0.010     |     | 0.197 ± 0.032     |     | 0.049 ± 0.005                   |     | 0.104 ± 0.013     |     |
| SO <sub>4</sub> <sup>2-</sup> | 0.087 ± 0.007                   |     | 0.179 ± 0.015     |     | 0.020 ± 0.002                      |     | 0.036 ± 0.005     |     | 0.172 ± 0.014     |     | 0.357 ± 0.037     |     | 0.149 ± 0.010                   |     | 0.294 ± 0.021     |     |
| NH <sub>4</sub> <sup>+</sup>  | 0.043 ± 0.003                   |     | 0.085 ± 0.005     |     | 0.052 ± 0.003                      |     | 0.191 ± 0.010     |     | 0.179 ± 0.010     |     | 0.365 ± 0.022     |     | 0.010 ± 0.001                   |     | 0.020 ± 0.002     |     |
| Ca <sup>2+</sup>              | 3.653 ± 0.085                   |     | 1.794 ± 0.092     |     | 2.592 ± 0.097                      |     | 1.801 ± 0.051     |     | 1.831 ± 0.082     |     | 2.608 ± 0.280     |     | 10.967 ± 0.154                  |     | 16.028 ± 0.226    |     |
| K <sup>+</sup>                | 0.205 ± 0.035                   |     | 0.268 ± 0.092     |     | 0.111 ± 0.015                      |     | 0.154 ± 0.051     |     | 0.191 ± 0.082     |     | 0.380 ± 0.280     |     | 0.200 ± 0.033                   |     | 0.324 ± 0.093     |     |
| Mg <sup>2+</sup>              | 0.090 ± 0.035                   |     | 0.131 ± 0.092     |     | 0.085 ± 0.015                      |     | 0.131 ± 0.051     |     | 0.915 ± 0.082     |     | 1.310 ± 0.280     |     | 0.418 ± 0.033                   |     | 0.698 ± 0.093     |     |
| Na <sup>+</sup>               | 0.184 ± 0.035                   |     | 0.246 ± 0.092     |     | 0.135 ± 0.015                      |     | 0.169 ± 0.051     |     | 0.053 ± 0.082     |     | 0.147 ± 0.280     |     | 0.312 ± 0.033                   |     | 0.435 ± 0.093     |     |

Supplement S4.1 - Chemical Concentrations (mass %) of Grab Soil Samples Re-suspended onto Filters, for PM<sub>10</sub> and PM<sub>2.5</sub> Fractions

| <u>Sample #</u>               | <u>S3017</u>                            |            |                         |            |
|-------------------------------|-----------------------------------------|------------|-------------------------|------------|
| <u>Locality</u>               | <u>USA, Dugway PG, Utah, X-ray Site</u> |            |                         |            |
| <u>Particle Size</u>          | <u>PM<sub>10</sub></u>                  |            | <u>PM<sub>2.5</sub></u> |            |
|                               | <u>Conc</u>                             | <u>Unc</u> | <u>Conc</u>             | <u>Unc</u> |
|                               | <u>%</u>                                | <u>%</u>   | <u>%</u>                | <u>%</u>   |
| <b><u>Majors</u></b>          |                                         |            |                         |            |
| Si                            | 8.134 ± 0.022                           |            | 9.952 ± 0.030           |            |
| Ti                            | 0.141 ± 0.002                           |            | 0.157 ± 0.004           |            |
| Al                            | 1.982 ± 0.020                           |            | 2.547 ± 0.029           |            |
| Fe                            | 1.631 ± 0.004                           |            | 1.837 ± 0.006           |            |
| Mg                            | 0.978 ± 0.005                           |            | 1.652 ± 0.010           |            |
| Ca                            | 13.354 ± 0.024                          |            | 14.881 ± 0.027          |            |
| K                             | 1.221 ± 0.005                           |            | 1.378 ± 0.006           |            |
|                               |                                         |            |                         |            |
| <b><u>Traces</u></b>          |                                         |            |                         |            |
| As                            | 0.00241 ± 0.00018                       |            | 0.00617 ± 0.00056       |            |
| Be                            | 0.00009 ± 0.00005                       |            | 0.00009 ± 0.00014       |            |
| Cd                            | 0.00006 ± 0.00005                       |            | 0.00006 ± 0.00014       |            |
| Cr                            | 0.00479 ± 0.00009                       |            | 0.00987 ± 0.00028       |            |
| Hg                            | 0.00001 ± 0.00009                       |            | 0.00023 ± 0.00028       |            |
| Mn                            | 0.04834 ± 0.00021                       |            | 0.05520 ± 0.00056       |            |
| Ni                            | 0.00194 ± 0.00018                       |            | 0.00221 ± 0.00056       |            |
| Pb                            | 0.00142 ± 0.00005                       |            | 0.00161 ± 0.00014       |            |
| Sb                            | 0.00013 ± 0.00005                       |            | 0.00013 ± 0.00014       |            |
| Sr                            | 0.07118 ± 0.00019                       |            | 0.08853 ± 0.00063       |            |
| V                             | 0.00337 ± 0.00005                       |            | 0.00290 ± 0.00014       |            |
| Zn                            | 0.00552 ± 0.00018                       |            | 0.00799 ± 0.00056       |            |
|                               |                                         |            |                         |            |
| <b><u>Ions</u></b>            |                                         |            |                         |            |
| CL <sup>-</sup>               | 0.122 ± 0.007                           |            | 0.241 ± 0.013           |            |
| NO <sub>3</sub> <sup>-</sup>  | 0.015 ± 0.002                           |            | 0.053 ± 0.006           |            |
| PO <sub>4</sub> <sup>3-</sup> | 0.050 ± 0.005                           |            | 0.078 ± 0.008           |            |
| SO <sub>4</sub> <sup>2-</sup> | 0.069 ± 0.005                           |            | 0.117 ± 0.009           |            |
| NH <sub>4</sub> <sup>+</sup>  | 0.019 ± 0.001                           |            | 0.041 ± 0.003           |            |
| Ca <sup>2+</sup>              | 7.367 ± 0.067                           |            | 11.221 ± 0.115          |            |
| K <sup>+</sup>                | 0.186 ± 0.027                           |            | 0.337 ± 0.046           |            |
| Mg <sup>2+</sup>              | 0.338 ± 0.027                           |            | 0.650 ± 0.046           |            |
| Na <sup>+</sup>               | 0.114 ± 0.027                           |            | 0.155 ± 0.046           |            |

Supplement S4.2 – Normative Mineral Concentrations (mass %) Calculated from Filter Chemistry

| Sample #                                                                    | S1000            |                   | S1005                                  |                   | S1006                                  |                   | S1007                                |                   | S1008                              |                   | S1009              |                   |
|-----------------------------------------------------------------------------|------------------|-------------------|----------------------------------------|-------------------|----------------------------------------|-------------------|--------------------------------------|-------------------|------------------------------------|-------------------|--------------------|-------------------|
|                                                                             | Hematite         |                   | Spain, Lanzarote, La Mala,<br>Sample 1 |                   | Spain, Lanzarote, La Mala,<br>Sample 2 |                   | Spain, Lanzarote, Mirador<br>del Rio |                   | Spain, Lanzarote, Vega de<br>Femes |                   | Mali, above Bamako |                   |
|                                                                             | PM <sub>10</sub> | PM <sub>2.5</sub> | PM <sub>10</sub>                       | PM <sub>2.5</sub> | PM <sub>10</sub>                       | PM <sub>2.5</sub> | PM <sub>10</sub>                     | PM <sub>2.5</sub> | PM <sub>10</sub>                   | PM <sub>2.5</sub> | PM <sub>10</sub>   | PM <sub>2.5</sub> |
| Particle Size                                                               | wt %             | wt %              | wt %                                   | wt %              | wt %                                   | wt %              | wt %                                 | wt %              | wt %                               | wt %              | wt %               | wt %              |
| <b>Silicates</b>                                                            |                  |                   |                                        |                   |                                        |                   |                                      |                   |                                    |                   |                    |                   |
| Quartz, SiO <sub>2</sub>                                                    | 0.349            | 0.260             | 9.571                                  | 13.452            | 4.979                                  | 8.070             | 11.570                               | 14.442            | 30.158                             | 34.671            | 14.715             | 17.458            |
| Kaolinite, Al <sub>2</sub> Si <sub>2</sub> O <sub>5</sub> (OH) <sub>4</sub> | 0.360            | 0.306             | 1.805                                  | 2.877             | 1.108                                  | 1.884             | 2.007                                | 2.631             | 6.201                              | 7.669             | 8.871              | 10.379            |
| <b>Carbonates</b>                                                           |                  |                   |                                        |                   |                                        |                   |                                      |                   |                                    |                   |                    |                   |
| Calcite, CaCO <sub>3</sub>                                                  | 0.000            | 0.000             | 31.262                                 | 39.764            | 46.537                                 | 56.526            | 21.299                               | 27.071            | 2.873                              | 2.452             | 1.439              | 1.134             |
| Dolomite, CaMg(CO <sub>3</sub> ) <sub>2</sub>                               | 0.000            | 0.000             | 7.480                                  | 11.818            | 4.589                                  | 9.596             | 11.035                               | 21.453            | 1.696                              | 2.570             | 0.615              | 0.587             |
| Magnesite, MgCO <sub>3</sub>                                                | 0.000            | 0.000             | 0.000                                  | 0.000             | 0.000                                  | 0.000             | 0.000                                | 0.000             | 0.000                              | 0.000             | 0.000              | 0.000             |
| Soda Ash, Na <sub>2</sub> CO <sub>3</sub>                                   | 0.000            | 0.000             | 0.000                                  | 0.000             | 0.095                                  | 0.092             | 0.492                                | 0.298             | 0.000                              | 0.000             | 0.000              | 0.000             |
| Potash, K <sub>2</sub> CO <sub>3</sub>                                      | 0.000            | 0.000             | 0.323                                  | 0.175             | 0.148                                  | 0.291             | 0.426                                | 0.638             | 0.198                              | 0.338             | 0.000              | 0.095             |
| <b>Sulfate &amp; Phosphate</b>                                              |                  |                   |                                        |                   |                                        |                   |                                      |                   |                                    |                   |                    |                   |
| CaSO <sub>4</sub> ·2H <sub>2</sub> O                                        | 0.385            | 0.002             | 0.289                                  | 0.221             | 0.399                                  | 0.484             | 0.679                                | 0.769             | 0.000                              | 0.000             | 0.000              | 0.000             |
| Apatite, Ca <sub>5</sub> (PO <sub>4</sub> ) <sub>3</sub> (F)                | 0.000            | 0.000             | 0.201                                  | 0.531             | 0.063                                  | 0.186             | 0.170                                | 0.360             | 0.083                              | 0.146             | 0.000              | 0.000             |
| <b>Evaporites</b>                                                           |                  |                   |                                        |                   |                                        |                   |                                      |                   |                                    |                   |                    |                   |
| Halite, NaCl                                                                | 0.116            | 0.111             | 0.367                                  | 0.659             | 0.123                                  | 0.343             | 0.845                                | 1.169             | 0.364                              | 0.600             | 0.090              | 0.017             |
| Sylvite, KCl                                                                | 0.050            | 0.012             | 0.047                                  | 0.580             | 0.000                                  | 0.000             | 0.000                                | 0.000             | 0.141                              | 0.226             | 0.182              | 0.009             |
| CaCl <sub>2</sub>                                                           | 0.000            | 0.097             | 0.000                                  | 0.000             | 0.000                                  | 0.000             | 0.000                                | 0.000             | 0.000                              | 0.000             | 0.000              | 0.000             |
| Bischofite, MgCl <sub>2</sub> ·6H <sub>2</sub> O                            | 0.099            | 0.207             | 0.000                                  | 0.000             | 0.000                                  | 0.000             | 0.000                                | 0.000             | 0.000                              | 0.000             | 0.008              | 0.000             |
| Thenardite, Na <sub>2</sub> SO <sub>4</sub>                                 | 0.000            | 0.000             | 0.000                                  | 0.000             | 0.000                                  | 0.000             | 0.000                                | 0.000             | 0.000                              | 0.000             | 0.000              | 0.000             |
| MgSO <sub>4</sub>                                                           | 0.047            | 0.000             | 0.000                                  | 0.000             | 0.000                                  | 0.000             | 0.000                                | 0.000             | 0.000                              | 0.000             | 0.000              | 0.000             |
| <b>Ammonium Salts</b>                                                       |                  |                   |                                        |                   |                                        |                   |                                      |                   |                                    |                   |                    |                   |
| Amm Sulf, (NH <sub>4</sub> ) <sub>2</sub> SO <sub>4</sub>                   | 0.181            | 0.260             | 0.082                                  | 0.261             | 0.041                                  | 0.081             | 0.044                                | 0.156             | 0.108                              | 0.128             | 0.116              | 0.078             |
| Amm Nitr, NH <sub>4</sub> NO <sub>3</sub>                                   | 0.000            | 0.000             | 0.000                                  | 0.000             | 0.000                                  | 0.000             | 0.000                                | 0.000             | 0.067                              | 0.824             | 0.000              | 0.211             |
| <b>Oxides</b>                                                               |                  |                   |                                        |                   |                                        |                   |                                      |                   |                                    |                   |                    |                   |
| Hematite, Fe <sub>2</sub> O <sub>3</sub>                                    | 86.731           | 81.107            | 2.296                                  | 3.015             | 1.516                                  | 2.250             | 4.304                                | 4.570             | 9.601                              | 9.881             | 23.127             | 19.966            |
| Rutile, TiO <sub>2</sub>                                                    | 0.000            | 0.000             | 0.211                                  | 0.253             | 0.156                                  | 0.205             | 0.676                                | 0.700             | 1.716                              | 1.741             | 0.703              | 0.744             |
| Pyrolusite, MnO <sub>2</sub>                                                | 0.021            | 0.023             | 0.051                                  | 0.053             | 0.026                                  | 0.034             | 0.037                                | 0.039             | 0.097                              | 0.125             | 0.052              | 0.064             |
| <b>Total</b>                                                                | <b>88.337</b>    | <b>82.386</b>     | <b>53.985</b>                          | <b>73.659</b>     | <b>59.781</b>                          | <b>80.044</b>     | <b>53.586</b>                        | <b>74.296</b>     | <b>53.302</b>                      | <b>61.370</b>     | <b>49.919</b>      | <b>50.741</b>     |

Supplement S4.2 – Normative Mineral Concentrations (mass %) Calculated from Filter Chemistry

| <u>Sample #</u>                                                             | <u>S1010</u>           |                         | <u>S1011</u>             |                         | <u>S1013</u>                                    |                         | <u>S1014</u>                                    |                         | <u>S1016</u>                                    |                         | <u>S1017</u>                                                   |                         |
|-----------------------------------------------------------------------------|------------------------|-------------------------|--------------------------|-------------------------|-------------------------------------------------|-------------------------|-------------------------------------------------|-------------------------|-------------------------------------------------|-------------------------|----------------------------------------------------------------|-------------------------|
| <u>Locality</u>                                                             | <u>Mali, Bamako</u>    |                         | <u>Mali, West Bamako</u> |                         | <u>Cape Verde, Sala Is, Ponta Fiure, Site A</u> |                         | <u>China (far northwest), Karamay, Sample 1</u> |                         | <u>China (far northwest), Karamay, Sample 2</u> |                         | <u>China (far northwest), Xinjiang (Daemon City), Sample 1</u> |                         |
| <u>Particle Size</u>                                                        | <u>PM<sub>10</sub></u> | <u>PM<sub>2.5</sub></u> | <u>PM<sub>10</sub></u>   | <u>PM<sub>2.5</sub></u> | <u>PM<sub>10</sub></u>                          | <u>PM<sub>2.5</sub></u> | <u>PM<sub>10</sub></u>                          | <u>PM<sub>2.5</sub></u> | <u>PM<sub>10</sub></u>                          | <u>PM<sub>2.5</sub></u> | <u>PM<sub>10</sub></u>                                         | <u>PM<sub>2.5</sub></u> |
|                                                                             | wt %                   | wt %                    | wt %                     | wt %                    | wt %                                            | wt %                    | wt %                                            | wt %                    | wt %                                            | wt %                    | wt %                                                           | wt %                    |
| <b>Silicates</b>                                                            |                        |                         |                          |                         |                                                 |                         |                                                 |                         |                                                 |                         |                                                                |                         |
| Quartz, SiO <sub>2</sub>                                                    | 17.842                 | 19.628                  | 15.250                   | 18.380                  | 13.923                                          | 18.417                  | 28.504                                          | 31.578                  | 30.466                                          | 31.442                  | 26.336                                                         | 33.014                  |
| Kaolinite, Al <sub>2</sub> Si <sub>2</sub> O <sub>5</sub> (OH) <sub>4</sub> | 7.841                  | 9.427                   | 8.874                    | 11.075                  | 3.092                                           | 4.303                   | 5.604                                           | 6.728                   | 5.625                                           | 6.245                   | 3.060                                                          | 3.863                   |
| <b>Carbonates</b>                                                           |                        |                         |                          |                         |                                                 |                         |                                                 |                         |                                                 |                         |                                                                |                         |
| Calcite, CaCO <sub>3</sub>                                                  | 0.868                  | 0.558                   | 0.283                    | 0.188                   | 25.133                                          | 16.612                  | 9.572                                           | 8.176                   | 4.474                                           | 4.114                   | 10.404                                                         | 4.942                   |
| Dolomite, CaMg(CO <sub>3</sub> ) <sub>2</sub>                               | 0.395                  | 0.921                   | 0.504                    | 0.700                   | 4.121                                           | 7.516                   | 1.190                                           | 2.131                   | 2.241                                           | 2.859                   | 2.465                                                          | 2.578                   |
| Magnesite, MgCO <sub>3</sub>                                                | 0.000                  | 0.000                   | 0.000                    | 0.000                   | 0.000                                           | 0.000                   | 0.000                                           | 0.000                   | 0.000                                           | 0.000                   | 0.000                                                          | 0.000                   |
| Soda Ash, Na <sub>2</sub> CO <sub>3</sub>                                   | 0.000                  | 0.000                   | 0.006                    | 0.017                   | 0.368                                           | 0.861                   | 0.298                                           | 0.475                   | 0.088                                           | 0.000                   | 3.787                                                          | 4.662                   |
| Potash, K <sub>2</sub> CO <sub>3</sub>                                      | 0.000                  | 0.146                   | 0.101                    | 0.130                   | 0.403                                           | 0.674                   | 0.173                                           | 0.394                   | 0.257                                           | 0.311                   | 1.399                                                          | 2.260                   |
| <b>Sulfate &amp; Phosphate</b>                                              |                        |                         |                          |                         |                                                 |                         |                                                 |                         |                                                 |                         |                                                                |                         |
| CaSO <sub>4</sub> ·2H <sub>2</sub> O                                        | 0.000                  | 0.000                   | 0.000                    | 0.000                   | 2.922                                           | 3.317                   | 0.097                                           | 0.100                   | 0.000                                           | 0.000                   | 1.071                                                          | 0.963                   |
| Apatite, Ca <sub>5</sub> (PO <sub>4</sub> ) <sub>3</sub> (F)                | 0.096                  | 0.123                   | 0.191                    | 0.325                   | 2.958                                           | 11.066                  | 0.000                                           | 0.156                   | 0.133                                           | 0.000                   | 0.069                                                          | 0.000                   |
| <b>Evaporites</b>                                                           |                        |                         |                          |                         |                                                 |                         |                                                 |                         |                                                 |                         |                                                                |                         |
| Halite, NaCl                                                                | 0.144                  | 0.064                   | 0.060                    | 0.180                   | 1.962                                           | 2.434                   | 0.331                                           | 0.490                   | 0.836                                           | 0.924                   | 0.854                                                          | 0.857                   |
| Sylvite, KCl                                                                | 0.190                  | 0.125                   | 0.000                    | 0.000                   | 0.000                                           | 0.000                   | 0.000                                           | 0.000                   | 0.000                                           | 0.084                   | 0.000                                                          | 0.000                   |
| CaCl <sub>2</sub>                                                           | 0.000                  | 0.000                   | 0.000                    | 0.000                   | 0.000                                           | 0.000                   | 0.000                                           | 0.000                   | 0.000                                           | 0.000                   | 0.000                                                          | 0.000                   |
| Bischofite, MgCl <sub>2</sub> ·6H <sub>2</sub> O                            | 0.374                  | 0.000                   | 0.000                    | 0.000                   | 0.000                                           | 0.000                   | 0.000                                           | 0.000                   | 0.000                                           | 0.000                   | 0.000                                                          | 0.000                   |
| Thenardite, Na <sub>2</sub> SO <sub>4</sub>                                 | 0.000                  | 0.000                   | 0.000                    | 0.000                   | 0.000                                           | 0.000                   | 0.000                                           | 0.000                   | 0.000                                           | 0.000                   | 0.000                                                          | 0.000                   |
| MgSO <sub>4</sub>                                                           | 0.000                  | 0.000                   | 0.000                    | 0.000                   | 0.000                                           | 0.000                   | 0.000                                           | 0.000                   | 0.000                                           | 0.000                   | 0.000                                                          | 0.000                   |
| <b>Ammonium Salts</b>                                                       |                        |                         |                          |                         |                                                 |                         |                                                 |                         |                                                 |                         |                                                                |                         |
| Amm Sulf, (NH <sub>4</sub> ) <sub>2</sub> SO <sub>4</sub>                   | 0.158                  | 0.155                   | 0.059                    | 0.036                   | 0.112                                           | 0.188                   | 0.071                                           | 0.136                   | 0.086                                           | 0.115                   | 0.000                                                          | 0.043                   |
| Amm Nitr, NH <sub>4</sub> NO <sub>3</sub>                                   | 0.715                  | 0.083                   | 0.209                    | 0.297                   | 0.000                                           | 0.000                   | 0.000                                           | 0.000                   | 0.000                                           | 0.000                   | 0.000                                                          | 0.000                   |
| <b>Oxides</b>                                                               |                        |                         |                          |                         |                                                 |                         |                                                 |                         |                                                 |                         |                                                                |                         |
| Hematite, Fe <sub>2</sub> O <sub>3</sub>                                    | 18.328                 | 18.099                  | 25.823                   | 26.101                  | 4.318                                           | 4.880                   | 6.448                                           | 6.927                   | 5.783                                           | 5.778                   | 4.553                                                          | 5.366                   |
| Rutile, TiO <sub>2</sub>                                                    | 0.855                  | 0.873                   | 0.906                    | 0.875                   | 0.470                                           | 0.501                   | 0.572                                           | 0.601                   | 0.577                                           | 0.574                   | 0.356                                                          | 0.378                   |
| Pyrolusite, MnO <sub>2</sub>                                                | 0.069                  | 0.088                   | 0.054                    | 0.056                   | 0.081                                           | 0.106                   | 0.108                                           | 0.135                   | 0.107                                           | 0.136                   | 0.109                                                          | 0.110                   |
| <b>Total</b>                                                                | <b>47.875</b>          | <b>50.291</b>           | <b>52.319</b>            | <b>58.362</b>           | <b>59.862</b>                                   | <b>70.878</b>           | <b>52.968</b>                                   | <b>58.026</b>           | <b>50.674</b>                                   | <b>52.583</b>           | <b>54.462</b>                                                  | <b>59.035</b>           |

Supplement S4.2 – Normative Mineral Concentrations (mass %) Calculated from Filter Chemistry

| Sample #                                                                    | S1018                                                         |                   | S1019              |                   | S1022                           |                   | S1023                          |                   | S1024                    |                   | S1025               |                   |
|-----------------------------------------------------------------------------|---------------------------------------------------------------|-------------------|--------------------|-------------------|---------------------------------|-------------------|--------------------------------|-------------------|--------------------------|-------------------|---------------------|-------------------|
|                                                                             | China (far northwest),<br>Xinjiang (Daemon City),<br>Sample 2 |                   | USA, Owens Lake CA |                   | Namibia, Etosha, Fischer<br>Pan |                   | Namibia, Etosha,<br>Stinkwater |                   | Namibia, Etosha, Lookout |                   | Morocco, Lake Iriki |                   |
|                                                                             | PM <sub>10</sub>                                              | PM <sub>2.5</sub> | PM <sub>10</sub>   | PM <sub>2.5</sub> | PM <sub>10</sub>                | PM <sub>2.5</sub> | PM <sub>10</sub>               | PM <sub>2.5</sub> | PM <sub>10</sub>         | PM <sub>2.5</sub> | PM <sub>10</sub>    | PM <sub>2.5</sub> |
| Particle Size                                                               | wt %                                                          | wt %              | wt %               | wt %              | wt %                            | wt %              | wt %                           | wt %              | wt %                     | wt %              | wt %                | wt %              |
| <b>Silicates</b>                                                            |                                                               |                   |                    |                   |                                 |                   |                                |                   |                          |                   |                     |                   |
| Quartz, SiO <sub>2</sub>                                                    | 33.006                                                        | 36.653            | 26.412             | 35.668            | 23.012                          | 30.497            | 7.637                          | 5.699             | 6.331                    | 9.516             | 25.796              | 28.400            |
| Kaolinite, Al <sub>2</sub> Si <sub>2</sub> O <sub>5</sub> (OH) <sub>4</sub> | 5.469                                                         | 6.243             | 2.936              | 3.843             | 0.225                           | 0.197             | 0.747                          | 0.723             | 0.591                    | 0.813             | 6.715               | 8.048             |
| <b>Carbonates</b>                                                           |                                                               |                   |                    |                   |                                 |                   |                                |                   |                          |                   |                     |                   |
| Calcite, CaCO <sub>3</sub>                                                  | 0.000                                                         | 0.000             | 15.163             | 4.992             | 6.242                           | 0.000             | 2.297                          | 0.367             | 3.623                    | 0.000             | 10.378              | 5.438             |
| Dolomite, CaMg(CO <sub>3</sub> ) <sub>2</sub>                               | 1.140                                                         | 0.121             | 1.006              | 4.090             | 16.712                          | 25.169            | 13.122                         | 9.561             | 15.614                   | 14.396            | 0.000               | 3.616             |
| Magnesite, MgCO <sub>3</sub>                                                | 0.413                                                         | 1.112             | 0.000              | 0.000             | 0.000                           | 0.272             | 0.000                          | 0.000             | 0.000                    | 0.994             | 0.000               | 0.000             |
| Soda Ash, Na <sub>2</sub> CO <sub>3</sub>                                   | 0.486                                                         | 2.257             | 4.770              | 3.949             | 1.940                           | 1.743             | 5.320                          | 11.889            | 8.607                    | 11.864            | 0.000               | 0.194             |
| Potash, K <sub>2</sub> CO <sub>3</sub>                                      | 0.335                                                         | 0.310             | 1.605              | 2.335             | 0.215                           | 0.265             | 0.273                          | 0.399             | 0.222                    | 0.274             | 0.000               | 0.559             |
| <b>Sulfate &amp; Phosphate</b>                                              |                                                               |                   |                    |                   |                                 |                   |                                |                   |                          |                   |                     |                   |
| CaSO <sub>4</sub> ·2H <sub>2</sub> O                                        | 0.868                                                         | 1.676             | 1.128              | 1.083             | 0.000                           | 0.000             | 0.000                          | 0.000             | 0.000                    | 0.000             | 0.008               | 0.089             |
| Apatite, Ca <sub>5</sub> (PO <sub>4</sub> ) <sub>3</sub> (F)                | 0.173                                                         | 0.000             | 0.068              | 0.214             | 0.026                           | 0.041             | 0.000                          | 0.000             | 0.040                    | 0.151             | 0.000               | 0.184             |
| <b>Evaporites</b>                                                           |                                                               |                   |                    |                   |                                 |                   |                                |                   |                          |                   |                     |                   |
| Halite, NaCl                                                                | 1.760                                                         | 0.575             | 1.206              | 2.466             | 4.685                           | 2.832             | 3.811                          | 2.449             | 2.748                    | 2.644             | 0.056               | 0.538             |
| Sylvite, KCl                                                                | 0.000                                                         | 0.000             | 0.000              | 0.000             | 0.000                           | 0.000             | 0.000                          | 0.000             | 0.000                    | 0.000             | 0.065               | 0.000             |
| CaCl <sub>2</sub>                                                           | 0.000                                                         | 0.000             | 0.000              | 0.000             | 0.000                           | 0.000             | 0.000                          | 0.000             | 0.000                    | 0.000             | 0.037               | 0.000             |
| Bischofite, MgCl <sub>2</sub> ·6H <sub>2</sub> O                            | 0.000                                                         | 0.000             | 0.000              | 0.000             | 0.000                           | 0.000             | 0.000                          | 0.000             | 0.000                    | 0.000             | 0.159               | 0.000             |
| Thenardite, Na <sub>2</sub> SO <sub>4</sub>                                 | 0.000                                                         | 0.000             | 0.000              | 0.000             | 1.787                           | 1.585             | 37.165                         | 49.536            | 43.233                   | 46.027            | 0.000               | 0.000             |
| MgSO <sub>4</sub>                                                           | 0.000                                                         | 0.000             | 0.000              | 0.000             | 0.000                           | 0.000             | 0.000                          | 0.000             | 0.000                    | 0.000             | 0.000               | 0.000             |
| <b>Ammonium Salts</b>                                                       |                                                               |                   |                    |                   |                                 |                   |                                |                   |                          |                   |                     |                   |
| Amm Sulf, (NH <sub>4</sub> ) <sub>2</sub> SO <sub>4</sub>                   | 1.163                                                         | 0.249             | 0.014              | 0.073             | 0.021                           | 0.055             | 0.082                          | 0.000             | 0.015                    | 0.104             | 0.242               | 0.190             |
| Amm Nitr, NH <sub>4</sub> NO <sub>3</sub>                                   | 0.000                                                         | 0.000             | 0.000              | 0.000             | 0.000                           | 0.000             | 0.000                          | 0.000             | 0.000                    | 0.000             | 0.000               | 0.000             |
| <b>Oxides</b>                                                               |                                                               |                   |                    |                   |                                 |                   |                                |                   |                          |                   |                     |                   |
| Hematite, Fe <sub>2</sub> O <sub>3</sub>                                    | 5.676                                                         | 5.714             | 5.028              | 5.673             | 0.787                           | 0.957             | 0.601                          | 0.379             | 0.633                    | 0.842             | 6.382               | 6.949             |
| Rutile, TiO <sub>2</sub>                                                    | 0.630                                                         | 0.622             | 0.438              | 0.410             | 0.077                           | 0.085             | 0.089                          | 0.028             | 0.045                    | 0.047             | 0.666               | 0.687             |
| Pyrolusite, MnO <sub>2</sub>                                                | 0.054                                                         | 0.062             | 0.093              | 0.119             | 0.019                           | 0.022             | 0.012                          | 0.010             | 0.010                    | 0.011             | 0.137               | 0.140             |
| <b>Total</b>                                                                | <b>51.173</b>                                                 | <b>55.594</b>     | <b>59.867</b>      | <b>64.916</b>     | <b>55.747</b>                   | <b>63.720</b>     | <b>71.157</b>                  | <b>81.040</b>     | <b>81.712</b>            | <b>87.684</b>     | <b>50.642</b>       | <b>55.032</b>     |



Supplement S4.2 – Normative Mineral Concentrations (mass %) Calculated from Filter Chemistry

| Sample #                                                                    | S1027                       |                   | S1033                                      |                   | S1034                                      |                   | S1035                              |                   | S1038                          |                   | S1039                          |                   |
|-----------------------------------------------------------------------------|-----------------------------|-------------------|--------------------------------------------|-------------------|--------------------------------------------|-------------------|------------------------------------|-------------------|--------------------------------|-------------------|--------------------------------|-------------------|
|                                                                             | Spain, Gran Canaria, Galdar |                   | Spain, Fuerteventura, Pozo Negro, Sample 1 |                   | Spain, Fuerteventura, Pozo Negro, Sample 2 |                   | Spain, Fuerteventura, La Ampuyenta |                   | Botswana, Makgadikgadi, Mopipi |                   | Botswana, Makgadikgadi, Rakops |                   |
|                                                                             | PM <sub>10</sub>            | PM <sub>2.5</sub> | PM <sub>10</sub>                           | PM <sub>2.5</sub> | PM <sub>10</sub>                           | PM <sub>2.5</sub> | PM <sub>10</sub>                   | PM <sub>2.5</sub> | PM <sub>10</sub>               | PM <sub>2.5</sub> | PM <sub>10</sub>               | PM <sub>2.5</sub> |
| Particle Size                                                               | wt %                        | wt %              | wt %                                       | wt %              | wt %                                       | wt %              | wt %                               | wt %              | wt %                           | wt %              | wt %                           | wt %              |
| <b>Silicates</b>                                                            |                             |                   |                                            |                   |                                            |                   |                                    |                   |                                |                   |                                |                   |
| Quartz, SiO <sub>2</sub>                                                    | 35.524                      | 34.086            | 22.109                                     | 26.368            | 25.329                                     | 29.292            | 21.033                             | 31.546            | 24.272                         | 35.188            | 17.275                         | 24.764            |
| Kaolinite, Al <sub>2</sub> Si <sub>2</sub> O <sub>5</sub> (OH) <sub>4</sub> | 6.647                       | 6.959             | 4.946                                      | 6.671             | 5.854                                      | 7.594             | 5.143                              | 8.158             | 1.683                          | 2.642             | 0.753                          | 0.981             |
| <b>Carbonates</b>                                                           |                             |                   |                                            |                   |                                            |                   |                                    |                   |                                |                   |                                |                   |
| Calcite, CaCO <sub>3</sub>                                                  | 0.301                       | 0.176             | 5.956                                      | 4.079             | 2.095                                      | 0.588             | 3.159                              | 3.521             | 19.097                         | 16.229            | 32.456                         | 29.043            |
| Dolomite, CaMg(CO <sub>3</sub> ) <sub>2</sub>                               | 2.412                       | 2.273             | 2.576                                      | 5.463             | 1.453                                      | 2.933             | 1.952                              | 3.147             | 1.330                          | 2.025             | 0.830                          | 3.309             |
| Magnesite, MgCO <sub>3</sub>                                                | 0.000                       | 0.000             | 0.000                                      | 0.000             | 0.000                                      | 0.000             | 0.000                              | 0.000             | 0.000                          | 0.000             | 0.000                          | 0.000             |
| Soda Ash, Na <sub>2</sub> CO <sub>3</sub>                                   | 0.185                       | 0.258             | 0.175                                      | 0.094             | 0.035                                      | 0.000             | 0.269                              | 0.288             | 0.322                          | 0.101             | 2.277                          | 2.925             |
| Potash, K <sub>2</sub> CO <sub>3</sub>                                      | 0.655                       | 0.524             | 0.486                                      | 0.707             | 0.259                                      | 0.349             | 0.680                              | 1.188             | 0.557                          | 0.810             | 0.317                          | 0.557             |
| <b>Sulfate &amp; Phosphate</b>                                              |                             |                   |                                            |                   |                                            |                   |                                    |                   |                                |                   |                                |                   |
| CaSO <sub>4</sub> ·2H <sub>2</sub> O                                        | 0.000                       | 0.000             | 0.172                                      | 0.124             | 0.042                                      | 0.000             | 0.035                              | 0.000             | 0.453                          | 0.404             | 0.464                          | 0.517             |
| Apatite, Ca <sub>5</sub> (PO <sub>4</sub> ) <sub>3</sub> (F)                | 0.000                       | 0.077             | 0.260                                      | 1.028             | 0.282                                      | 0.780             | 0.033                              | 0.101             | 0.051                          | 0.120             | 0.035                          | 0.078             |
| <b>Evaporites</b>                                                           |                             |                   |                                            |                   |                                            |                   |                                    |                   |                                |                   |                                |                   |
| Halite, NaCl                                                                | 0.000                       | 0.000             | 0.130                                      | 0.197             | 0.084                                      | 0.000             | 0.260                              | 0.661             | 0.125                          | 0.769             | 0.331                          | 0.749             |
| Sylvite, KCl                                                                | 0.000                       | 0.000             | 0.000                                      | 0.000             | 0.000                                      | 0.121             | 0.000                              | 0.000             | 0.000                          | 0.000             | 0.000                          | 0.000             |
| CaCl <sub>2</sub>                                                           | 0.000                       | 0.000             | 0.000                                      | 0.000             | 0.000                                      | 0.000             | 0.000                              | 0.000             | 0.000                          | 0.000             | 0.000                          | 0.000             |
| Bischofite, MgCl <sub>2</sub> ·6H <sub>2</sub> O                            | 0.000                       | 0.000             | 0.000                                      | 0.000             | 0.000                                      | 0.000             | 0.000                              | 0.000             | 0.000                          | 0.000             | 0.000                          | 0.000             |
| Thenardite, Na <sub>2</sub> SO <sub>4</sub>                                 | 0.000                       | 0.000             | 0.000                                      | 0.000             | 0.000                                      | 0.000             | 0.000                              | 0.000             | 0.000                          | 0.000             | 0.000                          | 0.000             |
| MgSO <sub>4</sub>                                                           | 0.000                       | 0.000             | 0.000                                      | 0.000             | 0.000                                      | 0.000             | 0.000                              | 0.000             | 0.000                          | 0.000             | 0.000                          | 0.000             |
| <b>Ammonium Salts</b>                                                       |                             |                   |                                            |                   |                                            |                   |                                    |                   |                                |                   |                                |                   |
| Amm Sulf, (NH <sub>4</sub> ) <sub>2</sub> SO <sub>4</sub>                   | 0.015                       | 0.058             | 0.077                                      | 0.174             | 0.155                                      | 0.219             | 0.177                              | 0.354             | 0.062                          | 0.261             | 0.000                          | 0.000             |
| Amm Nitr, NH <sub>4</sub> NO <sub>3</sub>                                   | 0.248                       | 0.198             | 0.000                                      | 0.000             | 0.000                                      | 0.189             | 0.000                              | 0.000             | 0.000                          | 0.000             | 0.000                          | 0.000             |
| <b>Oxides</b>                                                               |                             |                   |                                            |                   |                                            |                   |                                    |                   |                                |                   |                                |                   |
| Hematite, Fe <sub>2</sub> O <sub>3</sub>                                    | 7.576                       | 6.942             | 6.192                                      | 6.382             | 7.617                                      | 7.815             | 5.533                              | 7.195             | 2.843                          | 3.275             | 1.417                          | 1.704             |
| Rutile, TiO <sub>2</sub>                                                    | 1.561                       | 1.373             | 0.786                                      | 0.753             | 1.174                                      | 1.114             | 0.660                              | 0.866             | 0.198                          | 0.221             | 0.060                          | 0.072             |
| Pyrolusite, MnO <sub>2</sub>                                                | 0.334                       | 0.297             | 0.113                                      | 0.171             | 0.114                                      | 0.156             | 0.103                              | 0.109             | 0.044                          | 0.062             | 0.059                          | 0.066             |
| <b>Total</b>                                                                | <b>55.458</b>               | <b>53.223</b>     | <b>43.976</b>                              | <b>52.211</b>     | <b>44.491</b>                              | <b>51.149</b>     | <b>39.036</b>                      | <b>57.133</b>     | <b>51.036</b>                  | <b>62.109</b>     | <b>56.274</b>                  | <b>64.765</b>     |

Supplement S4.2 – Normative Mineral Concentrations (mass %) Calculated from Filter Chemistry

| Sample #                                                                    | S1040                                 |                   | S1041              |                   | S1042                          |                   | S1045                     |                   | S1049                                 |                   | S1050                                  |                   |
|-----------------------------------------------------------------------------|---------------------------------------|-------------------|--------------------|-------------------|--------------------------------|-------------------|---------------------------|-------------------|---------------------------------------|-------------------|----------------------------------------|-------------------|
|                                                                             | Botswana, Nxai Pan,<br>Baines Baobabs |                   | Botswana, Nxai Pan |                   | Chile, Atacama, Rock<br>Garden |                   | USA, Black Rock playa, NV |                   | Chad, Bodélé Depression,<br>Sample 44 |                   | Chad, Bodélé Depression,<br>Sample 44B |                   |
|                                                                             | PM <sub>10</sub>                      | PM <sub>2.5</sub> | PM <sub>10</sub>   | PM <sub>2.5</sub> | PM <sub>10</sub>               | PM <sub>2.5</sub> | PM <sub>10</sub>          | PM <sub>2.5</sub> | PM <sub>10</sub>                      | PM <sub>2.5</sub> | PM <sub>10</sub>                       | PM <sub>2.5</sub> |
| Particle Size                                                               | wt %                                  | wt %              | wt %               | wt %              | wt %                           | wt %              | wt %                      | wt %              | wt %                                  | wt %              | wt %                                   | wt %              |
| <b>Silicates</b>                                                            |                                       |                   |                    |                   |                                |                   |                           |                   |                                       |                   |                                        |                   |
| Quartz, SiO <sub>2</sub>                                                    | 16.324                                | 26.506            | 30.691             | 39.900            | 28.850                         | 31.841            | 27.964                    | 32.343            | 15.839                                | 33.604            | 24.619                                 | 34.756            |
| Kaolinite, Al <sub>2</sub> Si <sub>2</sub> O <sub>5</sub> (OH) <sub>4</sub> | 0.860                                 | 1.707             | 0.229              | 0.386             | 5.873                          | 7.252             | 4.444                     | 5.194             | 1.925                                 | 3.949             | 2.358                                  | 3.335             |
| <b>Carbonates</b>                                                           |                                       |                   |                    |                   |                                |                   |                           |                   |                                       |                   |                                        |                   |
| Calcite, CaCO <sub>3</sub>                                                  | 0.000                                 | 0.000             | 1.908              | 1.552             | 2.768                          | 2.272             | 7.536                     | 6.923             | 18.282                                | 20.713            | 29.650                                 | 21.385            |
| Dolomite, CaMg(CO <sub>3</sub> ) <sub>2</sub>                               | 4.659                                 | 3.475             | 6.036              | 9.332             | 0.694                          | 1.038             | 1.679                     | 2.750             | 3.014                                 | 3.601             | 3.165                                  | 3.422             |
| Magnesite, MgCO <sub>3</sub>                                                | 1.238                                 | 2.222             | 0.000              | 0.000             | 0.000                          | 0.000             | 0.000                     | 0.000             | 0.000                                 | 0.000             | 0.000                                  | 0.000             |
| Soda Ash, Na <sub>2</sub> CO <sub>3</sub>                                   | 27.909                                | 25.997            | 0.000              | 0.442             | 0.029                          | 0.000             | 3.229                     | 3.801             | 0.145                                 | 0.066             | 0.223                                  | 0.324             |
| Potash, K <sub>2</sub> CO <sub>3</sub>                                      | 1.261                                 | 1.372             | 0.048              | 0.253             | 0.240                          | 0.000             | 0.591                     | 0.854             | 0.036                                 | 0.120             | 0.040                                  | 0.091             |
| <b>Sulfate &amp; Phosphate</b>                                              |                                       |                   |                    |                   |                                |                   |                           |                   |                                       |                   |                                        |                   |
| CaSO <sub>4</sub> ·2H <sub>2</sub> O                                        | 1.735                                 | 1.997             | 0.000              | 0.422             | 10.311                         | 7.966             | 1.015                     | 0.752             | 0.000                                 | 0.000             | 0.000                                  | 0.000             |
| Apatite, Ca <sub>5</sub> (PO <sub>4</sub> ) <sub>3</sub> (F)                | 0.000                                 | 0.000             | 0.000              | 0.000             | 0.214                          | 0.328             | 0.082                     | 0.138             | 0.026                                 | 0.000             | 0.035                                  | 0.000             |
| <b>Evaporites</b>                                                           |                                       |                   |                    |                   |                                |                   |                           |                   |                                       |                   |                                        |                   |
| Halite, NaCl                                                                | 4.012                                 | 2.826             | 0.065              | 0.296             | 0.225                          | 0.355             | 1.463                     | 1.003             | 0.068                                 | 0.411             | 0.151                                  | 0.171             |
| Sylvite, KCl                                                                | 0.000                                 | 0.000             | 0.053              | 0.000             | 0.000                          | 0.361             | 0.000                     | 0.000             | 0.000                                 | 0.000             | 0.000                                  | 0.000             |
| CaCl <sub>2</sub>                                                           | 0.000                                 | 0.000             | 0.000              | 0.000             | 0.000                          | 0.000             | 0.000                     | 0.000             | 0.000                                 | 0.000             | 0.000                                  | 0.000             |
| Bischofite, MgCl <sub>2</sub> ·6H <sub>2</sub> O                            | 0.000                                 | 0.000             | 0.000              | 0.000             | 0.000                          | 0.016             | 0.000                     | 0.000             | 0.000                                 | 0.000             | 0.000                                  | 0.000             |
| Thenardite, Na <sub>2</sub> SO <sub>4</sub>                                 | 0.000                                 | 0.000             | 0.000              | 0.000             | 0.000                          | 0.000             | 0.000                     | 0.000             | 0.000                                 | 0.000             | 0.000                                  | 0.000             |
| MgSO <sub>4</sub>                                                           | 0.000                                 | 0.000             | 0.000              | 0.000             | 0.000                          | 0.000             | 0.000                     | 0.000             | 0.000                                 | 0.000             | 0.000                                  | 0.000             |
| <b>Ammonium Salts</b>                                                       |                                       |                   |                    |                   |                                |                   |                           |                   |                                       |                   |                                        |                   |
| Amm Sulf, (NH <sub>4</sub> ) <sub>2</sub> SO <sub>4</sub>                   | 0.008                                 | 0.063             | 0.079              | 0.111             | 0.314                          | 0.805             | 0.019                     | 0.000             | 0.110                                 | 0.127             | 0.078                                  | 0.062             |
| Amm Nitr, NH <sub>4</sub> NO <sub>3</sub>                                   | 0.000                                 | 0.000             | 0.000              | 0.000             | 0.000                          | 0.000             | 0.000                     | 0.000             | 0.000                                 | 0.000             | 0.000                                  | 0.000             |
| <b>Oxides</b>                                                               |                                       |                   |                    |                   |                                |                   |                           |                   |                                       |                   |                                        |                   |
| Hematite, Fe <sub>2</sub> O <sub>3</sub>                                    | 1.107                                 | 1.298             | 0.992              | 1.143             | 5.471                          | 6.136             | 5.224                     | 5.462             | 1.522                                 | 2.664             | 2.150                                  | 2.544             |
| Rutile, TiO <sub>2</sub>                                                    | 0.135                                 | 0.154             | 0.098              | 0.085             | 0.452                          | 0.442             | 0.425                     | 0.433             | 0.169                                 | 0.302             | 0.221                                  | 0.253             |
| Pyrolusite, MnO <sub>2</sub>                                                | 0.029                                 | 0.038             | 0.049              | 0.065             | 0.088                          | 0.101             | 0.088                     | 0.095             | 0.043                                 | 0.040             | 0.036                                  | 0.048             |
| <b>Total</b>                                                                | <b>59.277</b>                         | <b>67.655</b>     | <b>40.246</b>      | <b>53.988</b>     | <b>55.529</b>                  | <b>58.911</b>     | <b>53.760</b>             | <b>59.747</b>     | <b>41.180</b>                         | <b>65.597</b>     | <b>62.727</b>                          | <b>66.392</b>     |

Supplement S4.2 – Normative Mineral Concentrations (mass %) Calculated from Filter Chemistry

| Sample #                                                                    | S1051                                  |                   | S1052                                    |                   | S1053                                     |                   | S1055                                    |                   | S1056                                 |                   | S1057                                    |                   |
|-----------------------------------------------------------------------------|----------------------------------------|-------------------|------------------------------------------|-------------------|-------------------------------------------|-------------------|------------------------------------------|-------------------|---------------------------------------|-------------------|------------------------------------------|-------------------|
|                                                                             | Chad, Bodélé Depression,<br>Sample 44C |                   | USA, Reno NV, Peavine<br>Mtn, white clay |                   | USA, Reno NV, Peavine<br>Mtn, yellow soil |                   | China, Lanzhou, Jiuzhoutai<br>Mtn, loess |                   | Australia, Lake Eyre,<br>Cooper Creek |                   | Australia, Lake Eyre,<br>Warburton River |                   |
|                                                                             | PM <sub>10</sub>                       | PM <sub>2.5</sub> | PM <sub>10</sub>                         | PM <sub>2.5</sub> | PM <sub>10</sub>                          | PM <sub>2.5</sub> | PM <sub>10</sub>                         | PM <sub>2.5</sub> | PM <sub>10</sub>                      | PM <sub>2.5</sub> | PM <sub>10</sub>                         | PM <sub>2.5</sub> |
| Particle Size                                                               | wt %                                   | wt %              | wt %                                     | wt %              | wt %                                      | wt %              | wt %                                     | wt %              | wt %                                  | wt %              | wt %                                     | wt %              |
| <b>Silicates</b>                                                            |                                        |                   |                                          |                   |                                           |                   |                                          |                   |                                       |                   |                                          |                   |
| Quartz, SiO <sub>2</sub>                                                    | 53.876                                 | 53.113            | 48.951                                   | 51.750            | 22.106                                    | 31.437            | 24.019                                   | 25.976            | 25.278                                | 31.750            | 30.309                                   | 35.937            |
| Kaolinite, Al <sub>2</sub> Si <sub>2</sub> O <sub>5</sub> (OH) <sub>4</sub> | 5.645                                  | 5.901             | 3.684                                    | 4.295             | 5.124                                     | 7.781             | 4.718                                    | 6.282             | 5.770                                 | 7.486             | 7.519                                    | 8.972             |
| <b>Carbonates</b>                                                           |                                        |                   |                                          |                   |                                           |                   |                                          |                   |                                       |                   |                                          |                   |
| Calcite, CaCO <sub>3</sub>                                                  | 0.127                                  | 0.000             | 0.000                                    | 0.465             | 0.437                                     | 0.196             | 16.888                                   | 15.869            | 6.881                                 | 5.086             | 0.434                                    | 0.465             |
| Dolomite, CaMg(CO <sub>3</sub> ) <sub>2</sub>                               | 0.574                                  | 0.234             | 1.707                                    | 0.763             | 0.479                                     | 1.084             | 3.598                                    | 8.366             | 3.045                                 | 4.105             | 2.032                                    | 1.895             |
| Magnesite, MgCO <sub>3</sub>                                                | 0.000                                  | 0.188             | 1.300                                    | 0.000             | 0.000                                     | 0.000             | 0.000                                    | 0.000             | 0.000                                 | 0.000             | 0.000                                    | 0.000             |
| Soda Ash, Na <sub>2</sub> CO <sub>3</sub>                                   | 0.494                                  | 0.208             | 0.000                                    | 0.220             | 0.022                                     | 0.199             | 0.000                                    | 0.000             | 1.427                                 | 1.359             | 0.355                                    | 0.323             |
| Potash, K <sub>2</sub> CO <sub>3</sub>                                      | 0.187                                  | 0.042             | 0.681                                    | 0.082             | 0.086                                     | 0.177             | 0.221                                    | 0.000             | 0.420                                 | 0.552             | 0.404                                    | 0.391             |
| <b>Sulfate &amp; Phosphate</b>                                              |                                        |                   |                                          |                   |                                           |                   |                                          |                   |                                       |                   |                                          |                   |
| CaSO <sub>4</sub> ·2H <sub>2</sub> O                                        | 0.000                                  | 0.000             | 0.000                                    | 0.000             | 0.000                                     | 0.000             | 0.960                                    | 0.436             | 1.651                                 | 1.798             | 0.154                                    | 0.000             |
| Apatite, Ca <sub>5</sub> (PO <sub>4</sub> ) <sub>3</sub> (F)                | 0.000                                  | 0.211             | 0.179                                    | 0.154             | 0.000                                     | 0.000             | 0.062                                    | 0.295             | 0.194                                 | 0.281             | 0.155                                    | 0.193             |
| <b>Evaporites</b>                                                           |                                        |                   |                                          |                   |                                           |                   |                                          |                   |                                       |                   |                                          |                   |
| Halite, NaCl                                                                | 0.295                                  | 0.451             | 0.627                                    | 0.000             | 0.000                                     | 0.000             | 0.654                                    | 1.219             | 0.724                                 | 1.280             | 1.038                                    | 1.166             |
| Sylvite, KCl                                                                | 0.000                                  | 0.000             | 0.007                                    | 0.000             | 0.000                                     | 0.000             | 0.008                                    | 0.454             | 0.000                                 | 0.000             | 0.000                                    | 0.000             |
| CaCl <sub>2</sub>                                                           | 0.000                                  | 0.000             | 0.000                                    | 0.000             | 0.000                                     | 0.000             | 0.000                                    | 0.000             | 0.000                                 | 0.000             | 0.000                                    | 0.000             |
| Bischofite, MgCl <sub>2</sub> ·6H <sub>2</sub> O                            | 0.000                                  | 0.000             | 0.000                                    | 0.000             | 0.000                                     | 0.000             | 0.000                                    | 0.368             | 0.000                                 | 0.000             | 0.000                                    | 0.000             |
| Thenardite, Na <sub>2</sub> SO <sub>4</sub>                                 | 0.000                                  | 0.000             | 0.000                                    | 0.000             | 0.000                                     | 0.000             | 0.000                                    | 0.000             | 0.000                                 | 0.000             | 0.000                                    | 0.000             |
| MgSO <sub>4</sub>                                                           | 0.000                                  | 0.000             | 0.000                                    | 0.000             | 0.000                                     | 0.000             | 0.000                                    | 0.000             | 0.000                                 | 0.000             | 0.000                                    | 0.000             |
| <b>Ammonium Salts</b>                                                       |                                        |                   |                                          |                   |                                           |                   |                                          |                   |                                       |                   |                                          |                   |
| Amm Sulf, (NH <sub>4</sub> ) <sub>2</sub> SO <sub>4</sub>                   | 0.033                                  | 0.047             | 0.000                                    | 0.007             | 0.108                                     | 0.142             | 0.099                                    | 0.357             | 0.093                                 | 0.305             | 0.343                                    | 0.482             |
| Amm Nitr, NH <sub>4</sub> NO <sub>3</sub>                                   | 0.000                                  | 0.000             | 0.690                                    | 0.324             | 0.153                                     | 0.479             | 0.000                                    | 0.000             | 0.000                                 | 0.000             | 0.000                                    | 0.202             |
| <b>Oxides</b>                                                               |                                        |                   |                                          |                   |                                           |                   |                                          |                   |                                       |                   |                                          |                   |
| Hematite, Fe <sub>2</sub> O <sub>3</sub>                                    | 4.079                                  | 3.882             | 2.359                                    | 2.504             | 6.466                                     | 8.123             | 5.965                                    | 5.931             | 6.691                                 | 6.759             | 7.295                                    | 7.771             |
| Rutile, TiO <sub>2</sub>                                                    | 0.602                                  | 0.538             | 0.289                                    | 0.294             | 0.670                                     | 0.667             | 0.558                                    | 0.509             | 0.614                                 | 0.593             | 0.795                                    | 0.808             |
| Pyrolusite, MnO <sub>2</sub>                                                | 0.060                                  | 0.060             | 0.010                                    | 0.008             | 0.048                                     | 0.053             | 0.098                                    | 0.121             | 0.064                                 | 0.067             | 0.122                                    | 0.109             |
| <b>Total</b>                                                                | <b>65.974</b>                          | <b>64.876</b>     | <b>60.484</b>                            | <b>60.867</b>     | <b>35.699</b>                             | <b>50.338</b>     | <b>57.847</b>                            | <b>66.183</b>     | <b>52.851</b>                         | <b>61.420</b>     | <b>50.954</b>                            | <b>58.715</b>     |

Supplement S4.2 – Normative Mineral Concentrations (mass %) Calculated from Filter Chemistry

| Sample #<br>Locality                                                        | S1058                    |                           | S1060                                 |                           | S1062                                   |                           | S1064                             |                           | S1065                                    |                           | S1066                    |                           |
|-----------------------------------------------------------------------------|--------------------------|---------------------------|---------------------------------------|---------------------------|-----------------------------------------|---------------------------|-----------------------------------|---------------------------|------------------------------------------|---------------------------|--------------------------|---------------------------|
|                                                                             | Australia, Lake Frome    |                           | Serbia, Batajnica, Danube<br>R, loess |                           | Serbia, Kostolac, Lignite<br>pit, loess |                           | Serbia, Stari Slankamen,<br>loess |                           | USA, Carbondale,<br>California, red clay |                           | USA, Arizona Road Dust   |                           |
|                                                                             | PM <sub>10</sub><br>wt % | PM <sub>2.5</sub><br>wt % | PM <sub>10</sub><br>wt %              | PM <sub>2.5</sub><br>wt % | PM <sub>10</sub><br>wt %                | PM <sub>2.5</sub><br>wt % | PM <sub>10</sub><br>wt %          | PM <sub>2.5</sub><br>wt % | PM <sub>10</sub><br>wt %                 | PM <sub>2.5</sub><br>wt % | PM <sub>10</sub><br>wt % | PM <sub>2.5</sub><br>wt % |
| <b>Silicates</b>                                                            |                          |                           |                                       |                           |                                         |                           |                                   |                           |                                          |                           |                          |                           |
| Quartz, SiO <sub>2</sub>                                                    | 15.761                   | 31.237                    | 26.942                                | 31.938                    | 26.788                                  | 32.794                    | 26.990                            | 27.880                    | 22.052                                   | 20.466                    | 50.441                   | 50.012                    |
| Kaolinite, Al <sub>2</sub> Si <sub>2</sub> O <sub>5</sub> (OH) <sub>4</sub> | 3.173                    | 6.391                     | 6.740                                 | 8.641                     | 6.526                                   | 8.609                     | 6.727                             | 7.130                     | 12.029                                   | 12.545                    | 3.313                    | 4.478                     |
| <b>Carbonates</b>                                                           |                          |                           |                                       |                           |                                         |                           |                                   |                           |                                          |                           |                          |                           |
| Calcite, CaCO <sub>3</sub>                                                  | 0.000                    | 0.000                     | 1.077                                 | 0.818                     | 1.124                                   | 0.000                     | 7.202                             | 9.816                     | 0.366                                    | 0.191                     | 2.478                    | 3.207                     |
| Dolomite, CaMg(CO <sub>3</sub> ) <sub>2</sub>                               | 1.721                    | 4.173                     | 1.295                                 | 1.735                     | 4.344                                   | 6.413                     | 4.062                             | 4.415                     | 0.153                                    | 0.402                     | 1.360                    | 0.874                     |
| Magnesite, MgCO <sub>3</sub>                                                | 1.287                    | 6.442                     | 0.000                                 | 0.000                     | 0.000                                   | 0.074                     | 0.000                             | 0.000                     | 0.000                                    | 0.000                     | 0.000                    | 0.000                     |
| Soda Ash, Na <sub>2</sub> CO <sub>3</sub>                                   | 1.396                    | 0.188                     | 0.000                                 | 0.134                     | 0.076                                   | 0.000                     | 0.000                             | 0.293                     | 0.000                                    | 0.057                     | 0.909                    | 0.064                     |
| Potash, K <sub>2</sub> CO <sub>3</sub>                                      | 0.140                    | 0.301                     | 0.044                                 | 0.133                     | 0.126                                   | 0.329                     | 0.069                             | 0.237                     | 0.000                                    | 0.067                     | 0.826                    | 0.259                     |
| <b>Sulfate &amp; Phosphate</b>                                              |                          |                           |                                       |                           |                                         |                           |                                   |                           |                                          |                           |                          |                           |
| CaSO <sub>4</sub> ·2H <sub>2</sub> O                                        | 0.602                    | 0.000                     | 0.000                                 | 0.000                     | 0.000                                   | 0.000                     | 0.000                             | 0.000                     | 0.000                                    | 0.000                     | 0.000                    | 0.000                     |
| Apatite, Ca <sub>5</sub> (PO <sub>4</sub> ) <sub>3</sub> (F)                | 0.088                    | 0.000                     | 0.061                                 | 0.177                     | 0.043                                   | 0.000                     | 0.069                             | 0.125                     | 0.000                                    | 0.000                     | 0.053                    | 0.091                     |
| <b>Evaporites</b>                                                           |                          |                           |                                       |                           |                                         |                           |                                   |                           |                                          |                           |                          |                           |
| Halite, NaCl                                                                | 4.328                    | 6.819                     | 0.232                                 | 0.441                     | 0.000                                   | 0.253                     | 0.307                             | 0.401                     | 0.167                                    | 0.000                     | 0.082                    | 0.281                     |
| Sylvite, KCl                                                                | 0.000                    | 0.000                     | 0.097                                 | 0.000                     | 0.000                                   | 0.051                     | 0.093                             | 0.000                     | 0.044                                    | 0.000                     | 0.000                    | 0.000                     |
| CaCl <sub>2</sub>                                                           | 0.000                    | 0.000                     | 0.000                                 | 0.000                     | 0.000                                   | 0.000                     | 0.000                             | 0.000                     | 0.000                                    | 0.000                     | 0.000                    | 0.000                     |
| Bischofite, MgCl <sub>2</sub> ·6H <sub>2</sub> O                            | 0.000                    | 0.000                     | 0.000                                 | 0.000                     | 0.000                                   | 0.000                     | 0.000                             | 0.000                     | 0.318                                    | 0.000                     | 0.000                    | 0.000                     |
| Thenardite, Na <sub>2</sub> SO <sub>4</sub>                                 | 0.000                    | 0.000                     | 0.000                                 | 0.000                     | 0.000                                   | 0.000                     | 0.000                             | 0.000                     | 0.000                                    | 0.000                     | 0.000                    | 0.000                     |
| MgSO <sub>4</sub>                                                           | 0.000                    | 0.000                     | 0.000                                 | 0.000                     | 0.000                                   | 0.000                     | 0.000                             | 0.000                     | 0.000                                    | 0.000                     | 0.000                    | 0.000                     |
| <b>Ammonium Salts</b>                                                       |                          |                           |                                       |                           |                                         |                           |                                   |                           |                                          |                           |                          |                           |
| Amm Sulf, (NH <sub>4</sub> ) <sub>2</sub> SO <sub>4</sub>                   | 0.063                    | 1.127                     | 0.076                                 | 0.080                     | 0.000                                   | 0.000                     | 0.093                             | 0.122                     | 0.204                                    | 0.198                     | 0.026                    | 0.000                     |
| Amm Nitr, NH <sub>4</sub> NO <sub>3</sub>                                   | 0.000                    | 0.000                     | 0.000                                 | 0.787                     | 0.083                                   | 1.371                     | 0.615                             | 0.753                     | 0.868                                    | 0.183                     | 0.007                    | 0.226                     |
| <b>Oxides</b>                                                               |                          |                           |                                       |                           |                                         |                           |                                   |                           |                                          |                           |                          |                           |
| Hematite, Fe <sub>2</sub> O <sub>3</sub>                                    | 3.705                    | 6.720                     | 9.476                                 | 9.638                     | 8.099                                   | 9.276                     | 8.145                             | 7.610                     | 14.172                                   | 14.370                    | 1.979                    | 3.142                     |
| Rutile, TiO <sub>2</sub>                                                    | 0.362                    | 0.629                     | 0.825                                 | 0.703                     | 0.750                                   | 0.757                     | 0.663                             | 0.549                     | 0.955                                    | 0.888                     | 0.304                    | 0.372                     |
| Pyrolusite, MnO <sub>2</sub>                                                | 0.099                    | 0.209                     | 0.182                                 | 0.253                     | 0.122                                   | 0.145                     | 0.140                             | 0.157                     | 0.020                                    | 0.021                     | 0.040                    | 0.063                     |
| <b>Total</b>                                                                | <b>32.725</b>            | <b>64.237</b>             | <b>47.048</b>                         | <b>55.477</b>             | <b>48.082</b>                           | <b>60.071</b>             | <b>55.176</b>                     | <b>59.488</b>             | <b>51.347</b>                            | <b>49.388</b>             | <b>61.819</b>            | <b>63.069</b>             |

Supplement S4.2 – Normative Mineral Concentrations (mass %) Calculated from Filter Chemistry

| Sample #<br>Locality                                                        | S2001                    |                           | S2001                    |                           | S2002                    |                           | S2003                    |                           | S2004                    |                           | S2005                           |                           |
|-----------------------------------------------------------------------------|--------------------------|---------------------------|--------------------------|---------------------------|--------------------------|---------------------------|--------------------------|---------------------------|--------------------------|---------------------------|---------------------------------|---------------------------|
|                                                                             | Djibouti, Camp Lemonnier |                           | Djibouti, Camp Lemonnier |                           | Afghanistan, Bagram      |                           | Afghanistan, Khowst      |                           | Qatar, Al Udeid          |                           | United Arab Emirates, Al Dhafra |                           |
|                                                                             | PM <sub>10</sub><br>wt % | PM <sub>2.5</sub><br>wt % | PM <sub>10</sub><br>wt %        | PM <sub>2.5</sub><br>wt % |
| <b>Silicates</b>                                                            |                          |                           |                          |                           |                          |                           |                          |                           |                          |                           |                                 |                           |
| Quartz, SiO <sub>2</sub>                                                    | 18.059                   | 23.390                    | 16.616                   | 20.404                    | 15.753                   | 18.471                    | 27.587                   | 32.534                    | 20.735                   | 25.423                    | 6.655                           | 10.029                    |
| Kaolinite, Al <sub>2</sub> Si <sub>2</sub> O <sub>5</sub> (OH) <sub>4</sub> | 3.394                    | 4.513                     | 3.998                    | 5.293                     | 4.471                    | 5.992                     | 5.851                    | 8.895                     | 4.871                    | 6.281                     | 1.537                           | 2.357                     |
| <b>Carbonates</b>                                                           |                          |                           |                          |                           |                          |                           |                          |                           |                          |                           |                                 |                           |
| Calcite, CaCO <sub>3</sub>                                                  | 22.138                   | 18.815                    | 28.636                   | 23.866                    | 36.627                   | 37.243                    | 9.677                    | 8.211                     | 26.927                   | 13.713                    | 43.806                          | 42.944                    |
| Dolomite, CaMg(CO <sub>3</sub> ) <sub>2</sub>                               | 2.628                    | 4.889                     | 2.033                    | 3.424                     | 2.163                    | 3.026                     | 1.943                    | 1.882                     | 3.724                    | 7.060                     | 14.736                          | 25.559                    |
| Magnesite, MgCO <sub>3</sub>                                                | 0.000                    | 0.000                     | 0.000                    | 0.000                     | 0.000                    | 0.000                     | 0.000                    | 0.000                     | 0.000                    | 0.000                     | 0.000                           | 0.000                     |
| Soda Ash, Na <sub>2</sub> CO <sub>3</sub>                                   | -0.432                   | -0.542                    | 0.034                    | 0.020                     | 0.028                    | 0.085                     | 0.038                    | 0.001                     | 0.048                    | 0.064                     | 0.000                           | 0.000                     |
| Potash, K <sub>2</sub> CO <sub>3</sub>                                      | 0.000                    | 0.000                     | 0.479                    | 0.691                     | 0.474                    | 0.685                     | 0.220                    | 0.404                     | 0.252                    | 0.460                     | 0.086                           | 0.128                     |
| <b>Sulfate &amp; Phosphate</b>                                              |                          |                           |                          |                           |                          |                           |                          |                           |                          |                           |                                 |                           |
| CaSO <sub>4</sub> ·2H <sub>2</sub> O                                        | -0.179                   | -0.484                    | 2.667                    | 1.454                     | 0.030                    | 0.000                     | 0.132                    | 0.068                     | 0.000                    | 0.000                     | 2.231                           | 1.822                     |
| Apatite, Ca <sub>5</sub> (PO <sub>4</sub> ) <sub>3</sub> (F)                |                          |                           | 0.000                    | 0.000                     | 0.000                    | 0.000                     | 0.000                    | 0.000                     | 0.000                    | 0.000                     | 0.000                           | 0.000                     |
| <b>Evaporites</b>                                                           |                          |                           |                          |                           |                          |                           |                          |                           |                          |                           |                                 |                           |
| Halite, NaCl                                                                | 0.637                    | 0.850                     | 0.139                    | 0.190                     | 0.038                    | 0.000                     | 0.047                    | 0.119                     | 0.000                    | 0.063                     | 0.368                           | 0.520                     |
| Sylvite, KCl                                                                | 0.449                    | 0.568                     | 0.000                    | 0.000                     | 0.000                    | 0.000                     | 0.000                    | 0.000                     | 0.000                    | 0.000                     | 0.040                           | 0.088                     |
| CaCl <sub>2</sub>                                                           | 0.000                    | 0.000                     | 0.000                    | 0.000                     | 0.000                    | 0.000                     | 0.000                    | 0.000                     | 0.000                    | 0.000                     | 0.000                           | 0.000                     |
| Bischofite, MgCl <sub>2</sub> ·6H <sub>2</sub> O                            | -0.613                   | -0.775                    | 0.000                    | 0.000                     | 0.000                    | 0.000                     | 0.000                    | 0.000                     | 0.000                    | 0.000                     | 0.000                           | 0.000                     |
| Thenardite, Na <sub>2</sub> SO <sub>4</sub>                                 | 0.000                    | 0.000                     | 0.000                    | 0.000                     | 0.000                    | 0.000                     | 0.000                    | 0.000                     | 0.000                    | 0.000                     | 0.000                           | 0.000                     |
| MgSO <sub>4</sub>                                                           | 0.000                    | 0.000                     | 0.000                    | 0.000                     | 0.000                    | 0.000                     | 0.000                    | 0.000                     | 0.000                    | 0.000                     | 0.000                           | 0.000                     |
| <b>Ammonium Salts</b>                                                       |                          |                           |                          |                           |                          |                           |                          |                           |                          |                           |                                 |                           |
| Amm Sulf, (NH <sub>4</sub> ) <sub>2</sub> SO <sub>4</sub>                   | 0.362                    | 0.622                     | 0.195                    | 0.308                     | 0.156                    | 0.115                     | 0.108                    | 0.306                     | 0.073                    | 0.271                     | 0.145                           | 0.260                     |
| Amm Nitr, NH <sub>4</sub> NO <sub>3</sub>                                   | 0.000                    | 0.000                     | 0.000                    | 0.000                     | 0.000                    | 0.090                     | 0.000                    | 0.000                     | 0.047                    | 0.000                     | 0.000                           | 0.000                     |
| <b>Oxides</b>                                                               |                          |                           |                          |                           |                          |                           |                          |                           |                          |                           |                                 |                           |
| Hematite, Fe <sub>2</sub> O <sub>3</sub>                                    | 6.384                    | 6.734                     | 7.104                    | 7.503                     | 5.980                    | 6.641                     | 9.089                    | 10.271                    | 6.357                    | 7.114                     | 1.763                           | 2.439                     |
| Rutile, TiO <sub>2</sub>                                                    | 0.639                    | 0.591                     | 0.777                    | 0.769                     | 0.533                    | 0.586                     | 0.883                    | 1.151                     | 0.636                    | 0.731                     | 0.150                           | 0.225                     |
| Pyrolusite, MnO <sub>2</sub>                                                | 0.126                    | 0.191                     | 0.098                    | 0.224                     | 0.084                    | 0.128                     | 0.131                    | 0.223                     | 0.098                    | 0.131                     | 0.042                           | 0.056                     |
| <b>Total</b>                                                                | <b>53.592</b>            | <b>59.362</b>             | <b>62.777</b>            | <b>64.145</b>             | <b>66.338</b>            | <b>73.060</b>             | <b>55.705</b>            | <b>64.066</b>             | <b>63.768</b>            | <b>61.309</b>             | <b>71.560</b>                   | <b>86.427</b>             |

Supplement S4.2 – Normative Mineral Concentrations (mass %) Calculated from Filter Chemistry

| Sample #<br>Locality                                                        | S2006                    |                           | S2007                       |                           | S2008                    |                           | S2009                    |                           | S2010                    |                           | S2011                    |                           |
|-----------------------------------------------------------------------------|--------------------------|---------------------------|-----------------------------|---------------------------|--------------------------|---------------------------|--------------------------|---------------------------|--------------------------|---------------------------|--------------------------|---------------------------|
|                                                                             | Iraq, Balad              |                           | Iraq, Baghdad, Camp Victory |                           | Iraq, Tallil, Camp Adder |                           | Iraq, Tikrit, Speicher   |                           | Iraq, Taji               |                           | Iraq, Al Asad            |                           |
|                                                                             | PM <sub>10</sub><br>wt % | PM <sub>2.5</sub><br>wt % | PM <sub>10</sub><br>wt %    | PM <sub>2.5</sub><br>wt % | PM <sub>10</sub><br>wt % | PM <sub>2.5</sub><br>wt % | PM <sub>10</sub><br>wt % | PM <sub>2.5</sub><br>wt % | PM <sub>10</sub><br>wt % | PM <sub>2.5</sub><br>wt % | PM <sub>10</sub><br>wt % | PM <sub>2.5</sub><br>wt % |
| <b>Silicates</b>                                                            |                          |                           |                             |                           |                          |                           |                          |                           |                          |                           |                          |                           |
| Quartz, SiO <sub>2</sub>                                                    | 18.174                   | 20.850                    | 19.342                      | 23.079                    | 13.990                   | 19.558                    | 19.188                   | 24.115                    | 13.947                   | 12.456                    | 4.359                    | 7.249                     |
| Kaolinite, Al <sub>2</sub> Si <sub>2</sub> O <sub>5</sub> (OH) <sub>4</sub> | 3.842                    | 4.841                     | 4.502                       | 5.700                     | 2.860                    | 4.251                     | 4.623                    | 5.913                     | 2.847                    | 3.020                     | 1.220                    | 2.267                     |
| <b>Carbonates</b>                                                           |                          |                           |                             |                           |                          |                           |                          |                           |                          |                           |                          |                           |
| Calcite, CaCO <sub>3</sub>                                                  | 23.291                   | 17.986                    | 26.278                      | 18.898                    | 38.880                   | 38.813                    | 28.148                   | 21.861                    | 27.139                   | 28.301                    | 27.833                   | 23.893                    |
| Dolomite, CaMg(CO <sub>3</sub> ) <sub>2</sub>                               | 0.429                    | 3.873                     | 4.003                       | 7.846                     | 3.655                    | 2.519                     | 0.999                    | 1.920                     | 0.000                    | 0.184                     | 24.393                   | 34.692                    |
| Magnesite, MgCO <sub>3</sub>                                                | 0.000                    | 0.000                     | 0.000                       | 0.000                     | 0.000                    | 0.000                     | 0.000                    | 0.000                     | 0.000                    | 0.000                     | 0.000                    | 0.000                     |
| Soda Ash, Na <sub>2</sub> CO <sub>3</sub>                                   | 0.000                    | 0.000                     | 0.000                       | 0.000                     | 0.063                    | 0.000                     | 0.000                    | 0.035                     | 0.000                    | 0.000                     | 0.000                    | 0.000                     |
| Potash, K <sub>2</sub> CO <sub>3</sub>                                      | 0.000                    | 0.000                     | 0.000                       | 0.000                     | 0.225                    | 0.140                     | 0.209                    | 0.385                     | 0.000                    | 0.000                     | 0.000                    | 0.000                     |
| <b>Sulfate &amp; Phosphate</b>                                              |                          |                           |                             |                           |                          |                           |                          |                           |                          |                           |                          |                           |
| CaSO <sub>4</sub> ·2H <sub>2</sub> O                                        | 1.347                    | 2.231                     | 0.746                       | 0.241                     | 5.451                    | 3.562                     | 3.993                    | 4.291                     | 13.701                   | 18.490                    | 2.215                    | 0.646                     |
| Apatite, Ca <sub>5</sub> (PO <sub>4</sub> ) <sub>3</sub> (F)                | 0.000                    | 0.000                     | 0.000                       | 0.000                     | 0.000                    | 0.000                     | 0.000                    | 0.000                     | 0.000                    | 0.000                     | 0.000                    | 0.000                     |
| <b>Evaporites</b>                                                           |                          |                           |                             |                           |                          |                           |                          |                           |                          |                           |                          |                           |
| Halite, NaCl                                                                | 0.568                    | 0.428                     | 1.357                       | 1.160                     | 0.193                    | 0.170                     | 0.158                    | 0.176                     | 0.565                    | 0.430                     | 0.366                    | 0.514                     |
| Sylvite, KCl                                                                | 0.385                    | 0.538                     | 0.305                       | 0.406                     | 0.000                    | 0.017                     | 0.017                    | 0.000                     | 0.171                    | 0.290                     | 0.165                    | 0.423                     |
| CaCl <sub>2</sub>                                                           | 0.000                    | 0.000                     | 0.000                       | 0.000                     | 0.000                    | 0.000                     | 0.000                    | 0.000                     | 2.045                    | 0.000                     | 0.000                    | 0.000                     |
| Bischofite, MgCl <sub>2</sub> ·6H <sub>2</sub> O                            | 4.637                    | 3.638                     | 0.929                       | 0.725                     | 0.000                    | 0.000                     | 0.000                    | 0.000                     | 4.385                    | 5.269                     | 1.112                    | 1.605                     |
| Thenardite, Na <sub>2</sub> SO <sub>4</sub>                                 | 0.000                    | 0.000                     | 0.000                       | 0.000                     | 0.000                    | 0.000                     | 0.000                    | 0.000                     | 0.000                    | 0.000                     | 0.000                    | 0.000                     |
| MgSO <sub>4</sub>                                                           | 0.000                    | 0.000                     | 0.000                       | 0.000                     | 0.000                    | 0.000                     | 0.000                    | 0.000                     | 0.000                    | 0.000                     | 0.000                    | 0.000                     |
| <b>Ammonium Salts</b>                                                       |                          |                           |                             |                           |                          |                           |                          |                           |                          |                           |                          |                           |
| Amm Sulf, (NH <sub>4</sub> ) <sub>2</sub> SO <sub>4</sub>                   | 0.135                    | 0.509                     | 0.183                       | 0.334                     | 0.219                    | 0.505                     | 0.174                    | 0.420                     | 0.144                    | 1.651                     | 0.152                    | 0.829                     |
| Amm Nitr, NH <sub>4</sub> NO <sub>3</sub>                                   | 0.000                    | 0.000                     | 0.000                       | 0.000                     | 0.000                    | 0.000                     | 0.000                    | 0.000                     | 0.000                    | 0.000                     | 0.000                    | 0.000                     |
| <b>Oxides</b>                                                               |                          |                           |                             |                           |                          |                           |                          |                           |                          |                           |                          |                           |
| Hematite, Fe <sub>2</sub> O <sub>3</sub>                                    | 5.227                    | 5.209                     | 7.057                       | 7.637                     | 3.197                    | 4.468                     | 6.029                    | 6.818                     | 4.391                    | 2.986                     | 1.440                    | 2.206                     |
| Rutile, TiO <sub>2</sub>                                                    | 0.549                    | 0.560                     | 0.611                       | 0.640                     | 0.428                    | 0.607                     | 0.591                    | 0.675                     | 0.447                    | 0.375                     | 0.153                    | 0.280                     |
| Pyrolusite, MnO <sub>2</sub>                                                | 0.054                    | 0.079                     | 0.111                       | 0.130                     | 0.081                    | 0.085                     | 0.078                    | 0.106                     | 0.075                    | 0.080                     | 0.030                    | 0.039                     |
| <b>Total</b>                                                                | <b>58.637</b>            | <b>60.741</b>             | <b>65.426</b>               | <b>66.797</b>             | <b>69.241</b>            | <b>74.695</b>             | <b>64.207</b>            | <b>66.716</b>             | <b>69.857</b>            | <b>73.533</b>             | <b>63.438</b>            | <b>74.643</b>             |

Supplement S4.2 – Normative Mineral Concentrations (mass %) Calculated from Filter Chemistry

| Sample #                                                                    | S2012                       |                   | S2013                             |                   | S2014                          |                   | S2015                      |                   | S2016                                           |                   | S2017                  |                   |
|-----------------------------------------------------------------------------|-----------------------------|-------------------|-----------------------------------|-------------------|--------------------------------|-------------------|----------------------------|-------------------|-------------------------------------------------|-------------------|------------------------|-------------------|
|                                                                             | Kuwait North, Camp Buehring |                   | Kuwait Central, Camp Ali Al Salem |                   | Kuwait Coastal, Ash Shu Ayabah |                   | Kuwait South, Camp Arifjan |                   | Afghanistan, Helmand Province, Camp Leatherneck |                   | Kuwait, Ash Shu Ayabah |                   |
|                                                                             | PM <sub>10</sub>            | PM <sub>2.5</sub> | PM <sub>10</sub>                  | PM <sub>2.5</sub> | PM <sub>10</sub>               | PM <sub>2.5</sub> | PM <sub>10</sub>           | PM <sub>2.5</sub> | PM <sub>10</sub>                                | PM <sub>2.5</sub> | PM <sub>10</sub>       | PM <sub>2.5</sub> |
| Particle Size                                                               | wt %                        | wt %              | wt %                              | wt %              | wt %                           | wt %              | wt %                       | wt %              | wt %                                            | wt %              | wt %                   | wt %              |
| <b>Silicates</b>                                                            |                             |                   |                                   |                   |                                |                   |                            |                   |                                                 |                   |                        |                   |
| Quartz, SiO <sub>2</sub>                                                    | 21.306                      | 26.346            | 19.795                            | 24.199            | 18.314                         | 22.710            | 19.783                     | 23.606            | 22.560                                          | 28.268            | 18.338                 | 25.091            |
| Kaolinite, Al <sub>2</sub> Si <sub>2</sub> O <sub>5</sub> (OH) <sub>4</sub> | 4.734                       | 6.277             | 4.701                             | 5.922             | 3.868                          | 5.204             | 3.964                      | 5.244             | 4.325                                           | 5.944             | 3.034                  | 4.346             |
| <b>Carbonates</b>                                                           |                             |                   |                                   |                   |                                |                   |                            |                   |                                                 |                   |                        |                   |
| Calcite, CaCO <sub>3</sub>                                                  | 25.223                      | 18.686            | 32.247                            | 23.556            | 32.584                         | 28.472            | 29.514                     | 26.747            | 14.009                                          | 7.119             | 12.639                 | 10.307            |
| Dolomite, CaMg(CO <sub>3</sub> ) <sub>2</sub>                               | 2.572                       | 3.288             | 1.435                             | 2.152             | 1.690                          | 5.945             | 1.929                      | 6.655             | 2.136                                           | 5.570             | 2.905                  | 5.447             |
| Magnesite, MgCO <sub>3</sub>                                                | 0.000                       | 0.000             | 0.000                             | 0.000             | 0.000                          | 0.000             | 0.000                      | 0.000             | 0.000                                           | 0.000             | 0.000                  | 0.000             |
| Soda Ash, Na <sub>2</sub> CO <sub>3</sub>                                   | 0.004                       | 0.000             | 0.000                             | 0.000             | 0.000                          | 0.000             | 0.024                      | 0.001             | 0.130                                           | 0.152             | 0.000                  | 0.000             |
| Potash, K <sub>2</sub> CO <sub>3</sub>                                      | 0.357                       | 0.462             | 0.188                             | 0.213             | 0.174                          | 0.216             | 0.193                      | 0.221             | 0.262                                           | 0.604             | 0.020                  | 0.000             |
| <b>Sulfate &amp; Phosphate</b>                                              |                             |                   |                                   |                   |                                |                   |                            |                   |                                                 |                   |                        |                   |
| CaSO <sub>4</sub> .2H <sub>2</sub> O                                        | 1.803                       | 0.745             | 0.174                             | 0.615             | 0.710                          | 1.100             | 1.613                      | 2.821             | 0.303                                           | 0.131             | 0.166                  | 0.000             |
| Apatite, Ca <sub>5</sub> (PO <sub>4</sub> ) <sub>3</sub> (F)                | 0.000                       | 0.000             | 0.000                             | 0.000             | 0.000                          | 0.000             | 0.000                      | 0.000             | 0.043                                           | 0.101             | 0.062                  | 0.000             |
| <b>Evaporites</b>                                                           |                             |                   |                                   |                   |                                |                   |                            |                   |                                                 |                   |                        |                   |
| Halite, NaCl                                                                | 0.106                       | 0.106             | 0.167                             | 0.144             | 0.041                          | 0.053             | 0.116                      | 0.134             | 0.208                                           | 0.301             | 0.045                  | 0.055             |
| Sylvite, KCl                                                                | 0.000                       | 0.005             | 0.018                             | 0.024             | 0.013                          | 0.010             | 0.000                      | 0.000             | 0.000                                           | 0.000             | 0.166                  | 0.294             |
| CaCl <sub>2</sub>                                                           | 0.000                       | 0.000             | 0.000                             | 0.000             | 0.000                          | 0.000             | 0.000                      | 0.000             | 0.000                                           | 0.000             | 0.000                  | 0.000             |
| Bischofite, MgCl <sub>2</sub> .6H <sub>2</sub> O                            | 0.000                       | 0.000             | 0.000                             | 0.000             | 0.000                          | 0.000             | 0.000                      | 0.000             | 0.000                                           | 0.000             | 0.000                  | 0.070             |
| Thenardite, Na <sub>2</sub> SO <sub>4</sub>                                 | 0.000                       | 0.000             | 0.000                             | 0.000             | 0.000                          | 0.000             | 0.000                      | 0.000             | 0.000                                           | 0.000             | 0.000                  | 0.000             |
| MgSO <sub>4</sub>                                                           | 0.000                       | 0.000             | 0.000                             | 0.000             | 0.000                          | 0.000             | 0.000                      | 0.000             | 0.000                                           | 0.000             | 0.000                  | 0.000             |
| <b>Ammonium Salts</b>                                                       |                             |                   |                                   |                   |                                |                   |                            |                   |                                                 |                   |                        |                   |
| Amm Sulf, (NH <sub>4</sub> ) <sub>2</sub> SO <sub>4</sub>                   | 0.122                       | 0.249             | 0.295                             | 0.405             | 0.146                          | 0.285             | 0.156                      | 0.241             | 0.078                                           | 0.166             | 0.273                  | 0.521             |
| Amm Nitr, NH <sub>4</sub> NO <sub>3</sub>                                   | 0.000                       | 0.000             | 0.000                             | 0.000             | 0.000                          | 0.000             | 0.000                      | 0.000             | 0.000                                           | 0.000             | 0.000                  | 0.000             |
| <b>Oxides</b>                                                               |                             |                   |                                   |                   |                                |                   |                            |                   |                                                 |                   |                        |                   |
| Hematite, Fe <sub>2</sub> O <sub>3</sub>                                    | 6.380                       | 7.182             | 5.226                             | 5.619             | 5.174                          | 5.654             | 4.561                      | 5.191             | 5.305                                           | 6.164             | 4.362                  | 5.341             |
| Rutile, TiO <sub>2</sub>                                                    | 0.614                       | 0.713             | 0.478                             | 0.533             | 0.508                          | 0.586             | 0.492                      | 0.554             | 0.424                                           | 0.511             | 0.345                  | 0.400             |
| Pyrolusite, MnO <sub>2</sub>                                                | 0.100                       | 0.132             | 0.082                             | 0.096             | 0.074                          | 0.086             | 0.062                      | 0.070             | 0.092                                           | 0.129             | 0.076                  | 0.097             |
| <b>Total</b>                                                                | <b>63.318</b>               | <b>64.192</b>     | <b>64.805</b>                     | <b>63.477</b>     | <b>63.297</b>                  | <b>70.323</b>     | <b>62.408</b>              | <b>71.484</b>     | <b>49.877</b>                                   | <b>55.159</b>     | <b>42.430</b>          | <b>51.969</b>     |

Supplement S4.2 – Normative Mineral Concentrations (mass %) Calculated from Filter Chemistry

| Sample #                                                                    | S3003                            |                   | S3004                              |                   | S3008                                 |                   | S3011             |                   | S3016                              |                   | S3017                                |                   |
|-----------------------------------------------------------------------------|----------------------------------|-------------------|------------------------------------|-------------------|---------------------------------------|-------------------|-------------------|-------------------|------------------------------------|-------------------|--------------------------------------|-------------------|
|                                                                             | USA, YPG, Yuma AZ, Area<br>3835Z |                   | USA, YPG, Yuma, AZ, Area<br>26500R |                   | USA, YPG, Yuma AZ,<br>Roadrunner Site |                   | USA, Ft Carson CO |                   | USA, Dugway PG, Utah,<br>Lima Site |                   | USA, Dugway PG, Utah, X-<br>ray Site |                   |
|                                                                             | PM <sub>10</sub>                 | PM <sub>2.5</sub> | PM <sub>10</sub>                   | PM <sub>2.5</sub> | PM <sub>10</sub>                      | PM <sub>2.5</sub> | PM <sub>10</sub>  | PM <sub>2.5</sub> | PM <sub>10</sub>                   | PM <sub>2.5</sub> | PM <sub>10</sub>                     | PM <sub>2.5</sub> |
| Particle Size                                                               | wt %                             | wt %              | wt %                               | wt %              | wt %                                  | wt %              | wt %              | wt %              | wt %                               | wt %              | wt %                                 | wt %              |
| <b>Silicates</b>                                                            |                                  |                   |                                    |                   |                                       |                   |                   |                   |                                    |                   |                                      |                   |
| Quartz, SiO <sub>2</sub>                                                    | 24.989                           | 31.578            | 27.670                             | 33.399            | 25.975                                | 35.664            | 35.139            | 36.814            | 16.637                             | 18.562            | 16.298                               | 19.873            |
| Kaolinite, Al <sub>2</sub> Si <sub>2</sub> O <sub>5</sub> (OH) <sub>4</sub> | 4.537                            | 5.918             | 5.540                              | 6.897             | 4.860                                 | 7.105             | 6.959             | 7.491             | 2.096                              | 2.793             | 2.207                                | 2.836             |
| <b>Carbonates</b>                                                           |                                  |                   |                                    |                   |                                       |                   |                   |                   |                                    |                   |                                      |                   |
| Calcite, CaCO <sub>3</sub>                                                  | 16.366                           | 5.943             | 10.049                             | 4.141             | 7.270                                 | 4.836             | 2.289             | 0.373             | 36.928                             | 40.851            | 31.781                               | 34.252            |
| Dolomite, CaMg(CO <sub>3</sub> ) <sub>2</sub>                               | 2.955                            | 6.553             | 0.685                              | 0.992             | 0.641                                 | 0.994             | 4.091             | 6.006             | 3.169                              | 5.294             | 2.563                                | 4.933             |
| Magnesite, MgCO <sub>3</sub>                                                | 0.000                            | 0.000             | 0.000                              | 0.000             | 0.000                                 | 0.000             | 0.000             | 0.000             | 0.000                              | 0.000             | 0.000                                | 0.000             |
| Soda Ash, Na <sub>2</sub> CO <sub>3</sub>                                   | 0.000                            | 0.000             | 0.359                              | 0.512             | 0.310                                 | 0.259             | 0.000             | 0.000             | 0.175                              | 0.267             | 0.081                                | 0.000             |
| Potash, K <sub>2</sub> CO <sub>3</sub>                                      | 0.000                            | 0.000             | 0.362                              | 0.474             | 0.195                                 | 0.272             | 0.000             | 0.000             | 0.354                              | 0.573             | 0.329                                | 0.593             |
| <b>Sulfate &amp; Phosphate</b>                                              |                                  |                   |                                    |                   |                                       |                   |                   |                   |                                    |                   |                                      |                   |
| CaSO <sub>4</sub> ·2H <sub>2</sub> O                                        | 1.850                            | 0.874             | 0.000                              | 0.000             | 0.000                                 | 0.000             | 0.000             | 0.000             | 0.352                              | 0.466             | 0.153                                | 0.162             |
| Apatite, Ca <sub>5</sub> (PO <sub>4</sub> ) <sub>3</sub> (F)                | 0.065                            | 0.182             | 0.058                              | 0.234             | 0.060                                 | 0.217             | 0.123             | 0.349             | 0.087                              | 0.184             | 0.088                                | 0.139             |
| <b>Evaporites</b>                                                           |                                  |                   |                                    |                   |                                       |                   |                   |                   |                                    |                   |                                      |                   |
| Halite, NaCl                                                                | 0.326                            | 0.601             | 0.073                              | 0.061             | 0.000                                 | 0.143             | 0.135             | 0.374             | 0.600                              | 0.812             | 0.201                                | 0.395             |
| Sylvite, KCl                                                                | 0.318                            | 0.606             | 0.000                              | 0.000             | 0.000                                 | 0.000             | 0.364             | 0.724             | 0.000                              | 0.000             | 0.000                                | 0.003             |
| CaCl <sub>2</sub>                                                           | 0.000                            | 0.000             | 0.000                              | 0.000             | 0.000                                 | 0.000             | 0.000             | 0.000             | 0.000                              | 0.000             | 0.000                                | 0.000             |
| Bischofite, MgCl <sub>2</sub> ·6H <sub>2</sub> O                            | 0.960                            | 2.139             | 0.000                              | 0.000             | 0.000                                 | 0.000             | 3.143             | 4.335             | 0.000                              | 0.000             | 0.000                                | 0.000             |
| Thenardite, Na <sub>2</sub> SO <sub>4</sub>                                 | 0.000                            | 0.000             | 0.000                              | 0.000             | 0.000                                 | 0.000             | 0.000             | 0.000             | 0.000                              | 0.000             | 0.000                                | 0.000             |
| MgSO <sub>4</sub>                                                           | 0.000                            | 0.000             | 0.000                              | 0.000             | 0.000                                 | 0.000             | 0.000             | 0.000             | 0.000                              | 0.000             | 0.000                                | 0.000             |
| <b>Ammonium Salts</b>                                                       |                                  |                   |                                    |                   |                                       |                   |                   |                   |                                    |                   |                                      |                   |
| Amm Sulf, (NH <sub>4</sub> ) <sub>2</sub> SO <sub>4</sub>                   | 0.159                            | 0.538             | 0.053                              | 0.028             | 0.000                                 | 0.000             | 0.154             | 0.153             | 0.037                              | 0.074             | 0.069                                | 0.150             |
| Amm Nitr, NH <sub>4</sub> NO <sub>3</sub>                                   | 0.000                            | 0.000             | 0.075                              | 0.251             | 0.175                                 | 0.771             | 0.421             | 0.994             | 0.000                              | 0.000             | 0.000                                | 0.000             |
| <b>Oxides</b>                                                               |                                  |                   |                                    |                   |                                       |                   |                   |                   |                                    |                   |                                      |                   |
| Hematite, Fe <sub>2</sub> O <sub>3</sub>                                    | 4.150                            | 4.493             | 5.215                              | 5.572             | 5.732                                 | 6.374             | 6.157             | 5.653             | 2.040                              | 2.372             | 2.331                                | 2.627             |
| Rutile, TiO <sub>2</sub>                                                    | 0.412                            | 0.412             | 0.425                              | 0.498             | 0.610                                 | 0.626             | 0.665             | 0.585             | 0.233                              | 0.216             | 0.235                                | 0.262             |
| Pyrolusite, MnO <sub>2</sub>                                                | 0.060                            | 0.087             | 0.083                              | 0.104             | 0.062                                 | 0.086             | 0.060             | 0.063             | 0.078                              | 0.189             | 0.077                                | 0.087             |
| <b>Total</b>                                                                | <b>57.148</b>                    | <b>59.924</b>     | <b>50.646</b>                      | <b>53.163</b>     | <b>45.892</b>                         | <b>57.347</b>     | <b>59.700</b>     | <b>63.913</b>     | <b>62.785</b>                      | <b>72.653</b>     | <b>56.413</b>                        | <b>66.313</b>     |



Supplement S4.3 – Plots of Normative Mineral Concentrations (mass %) Calculated from Filter Chemistry, Normalized to 100%

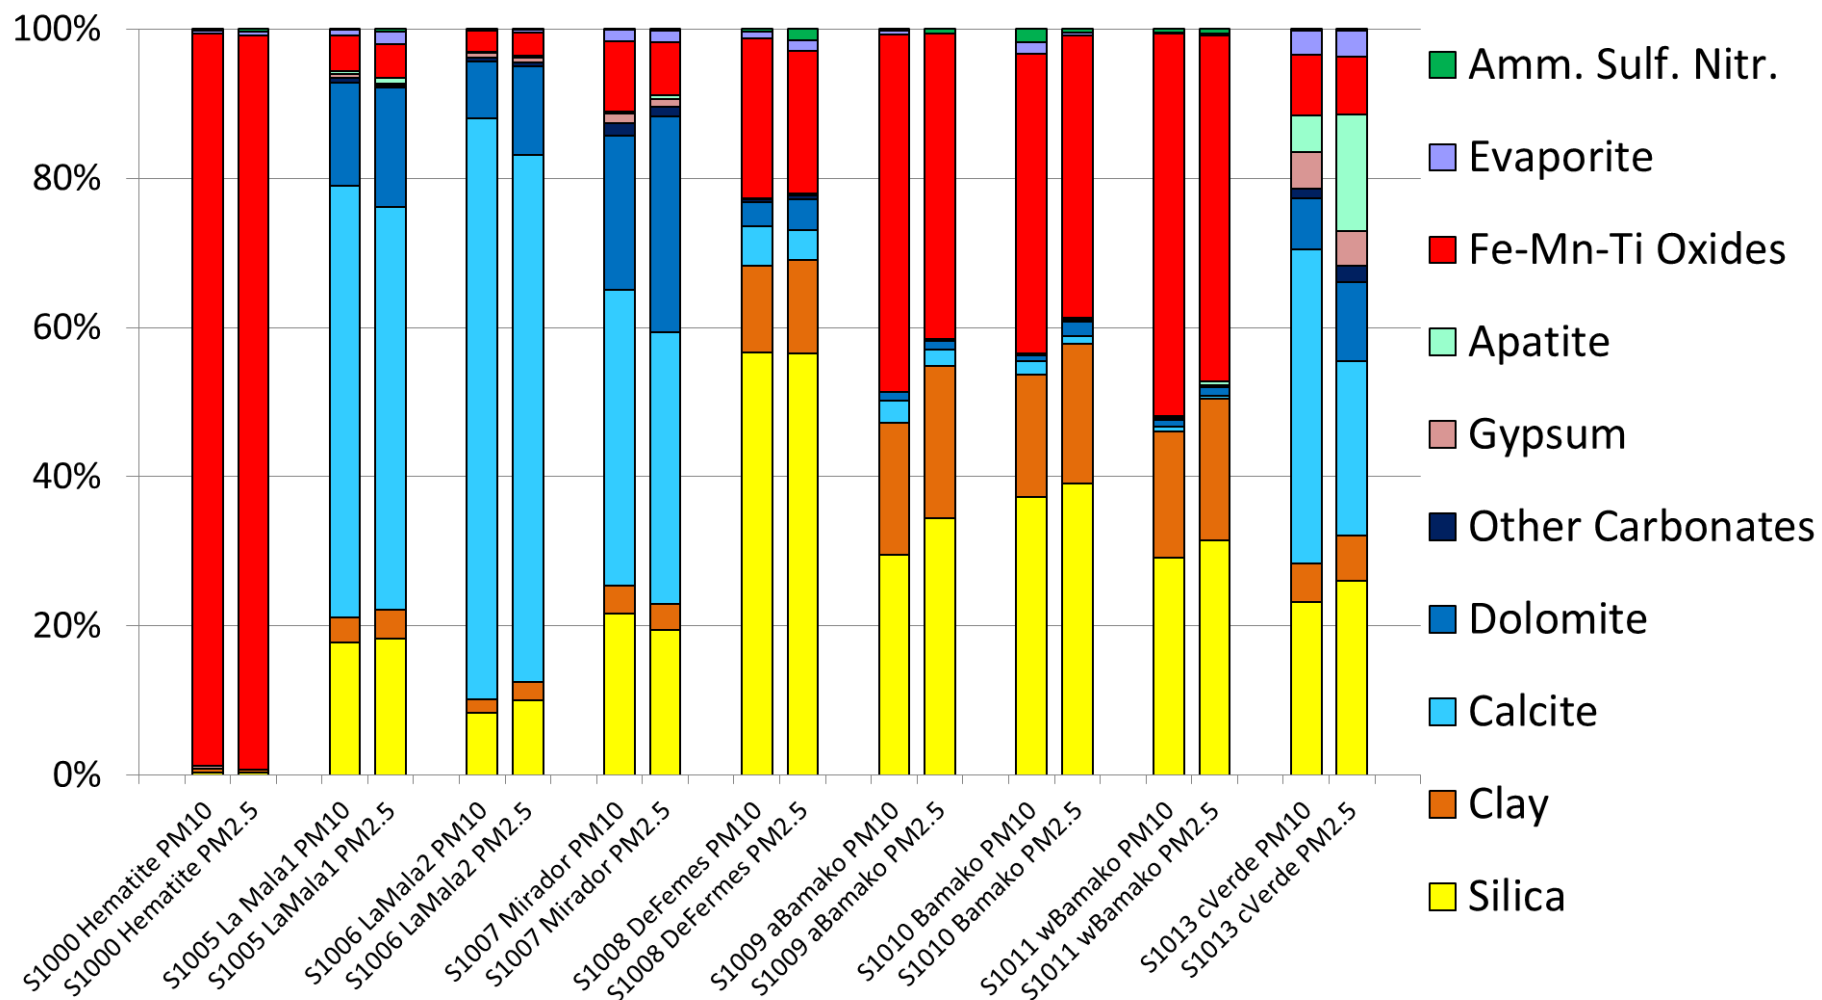

Supplement S4.3 – Plots of Normative Mineral Concentrations (mass %) Calculated from Filter Chemistry, Normalized to 100%

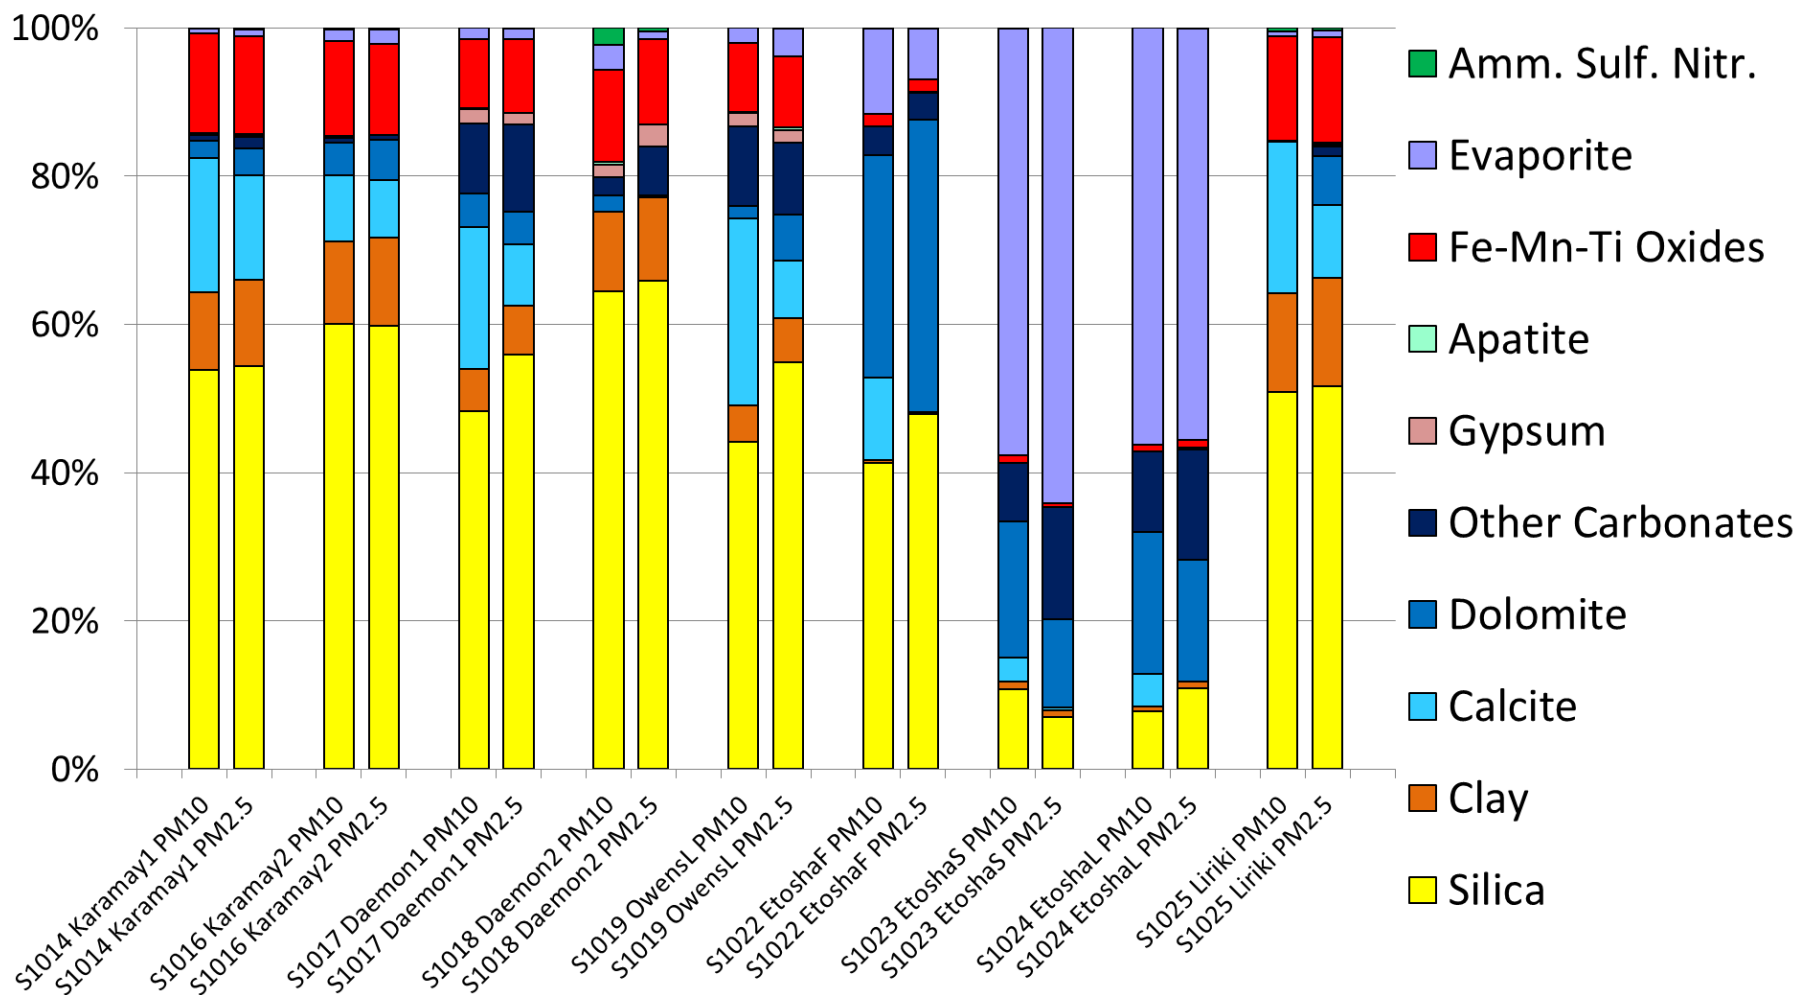

Supplement S4.3 – Plots of Normative Mineral Concentrations (mass %) Calculated from Filter Chemistry, Normalized to 100%

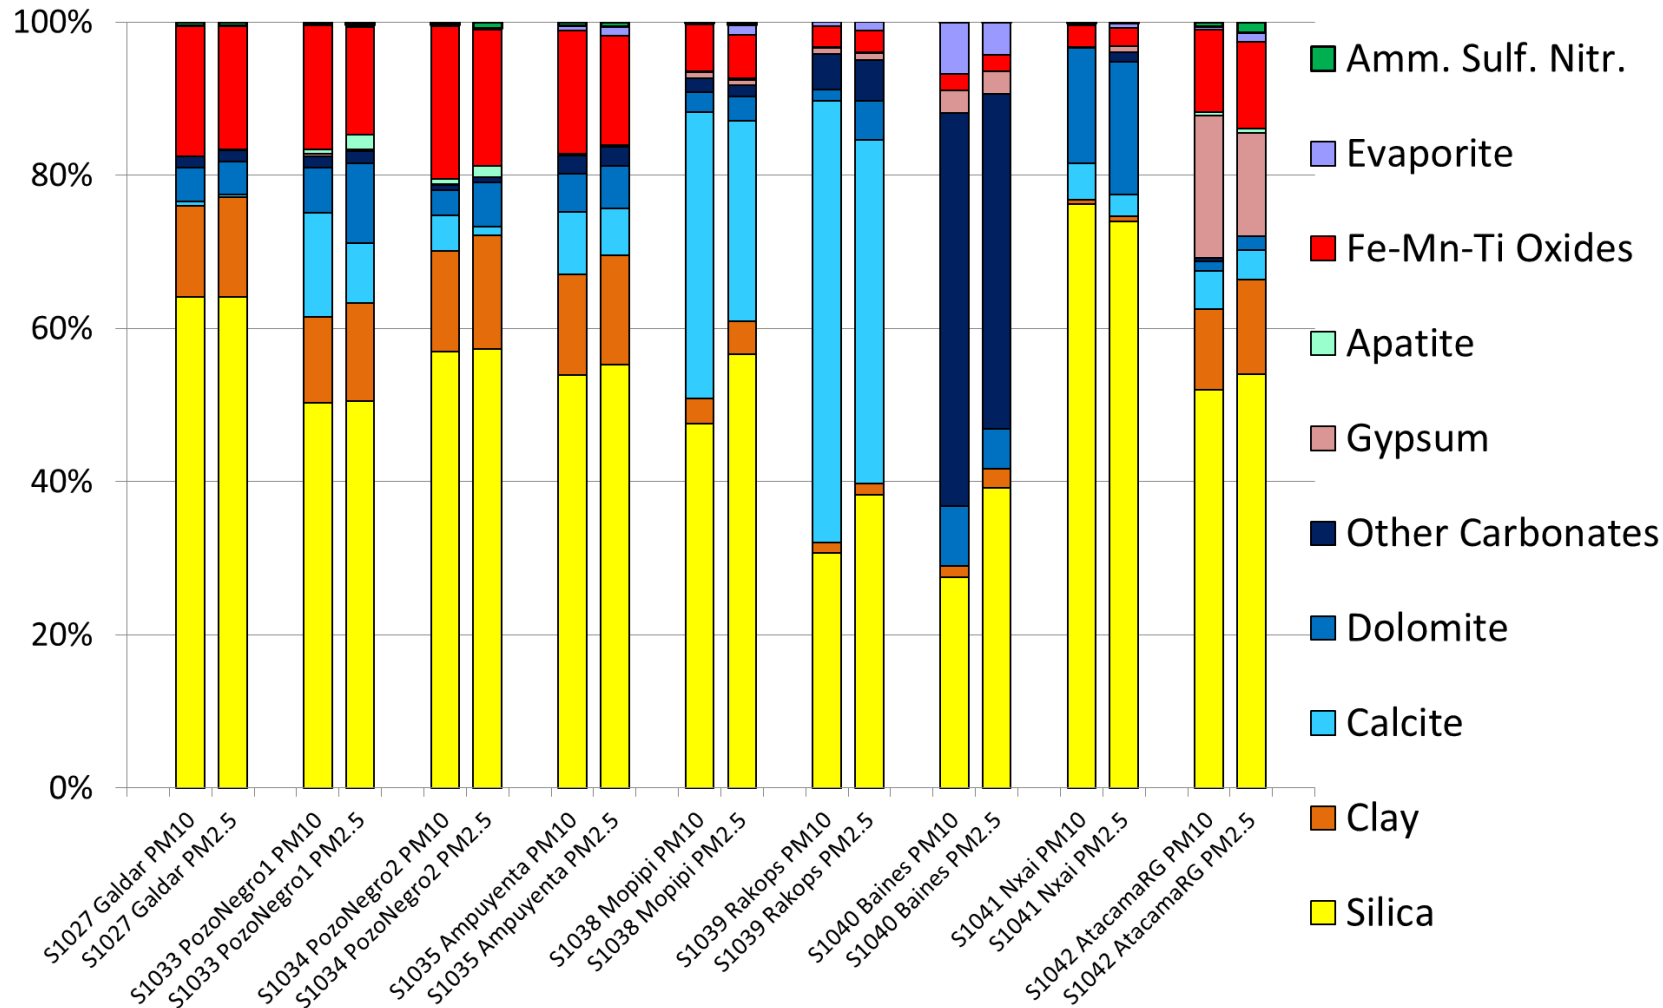

Supplement S4.3 – Plots of Normative Mineral Concentrations (mass %) Calculated from Filter Chemistry, Normalized to 100%

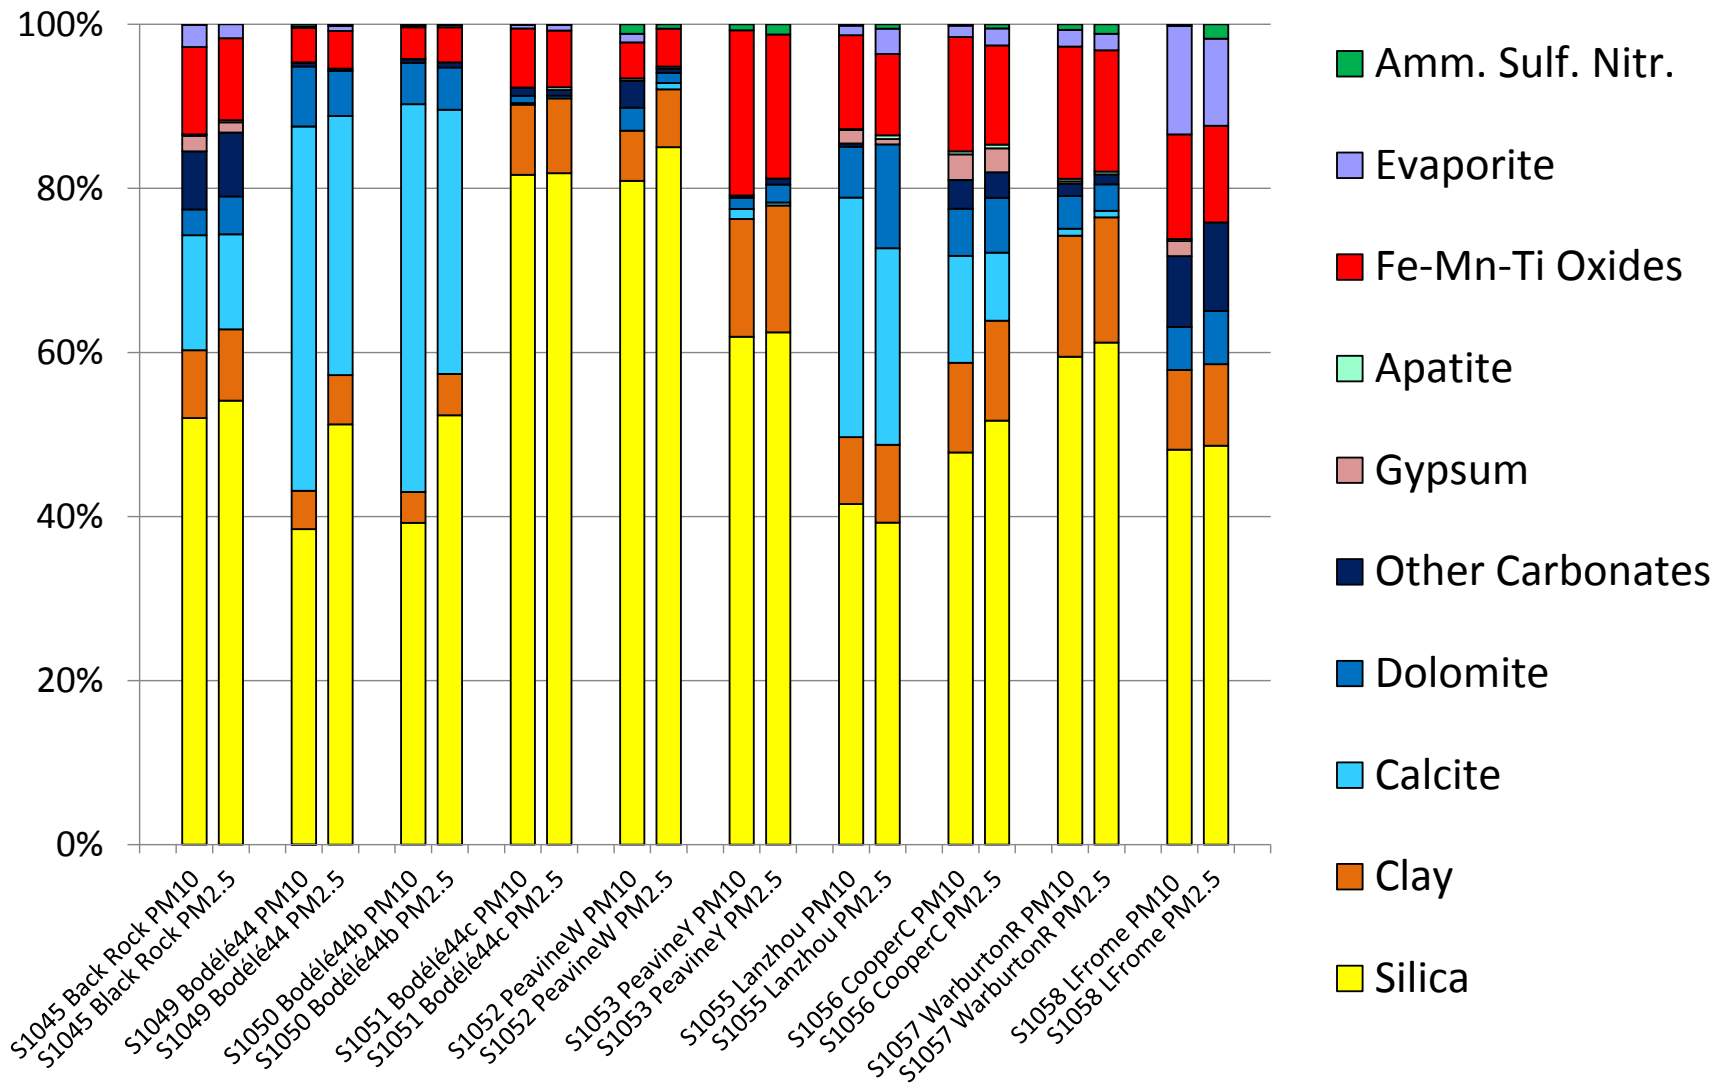

Supplement S4.3 – Plots of Normative Mineral Concentrations (mass %) Calculated from Filter Chemistry, Normalized to 100%

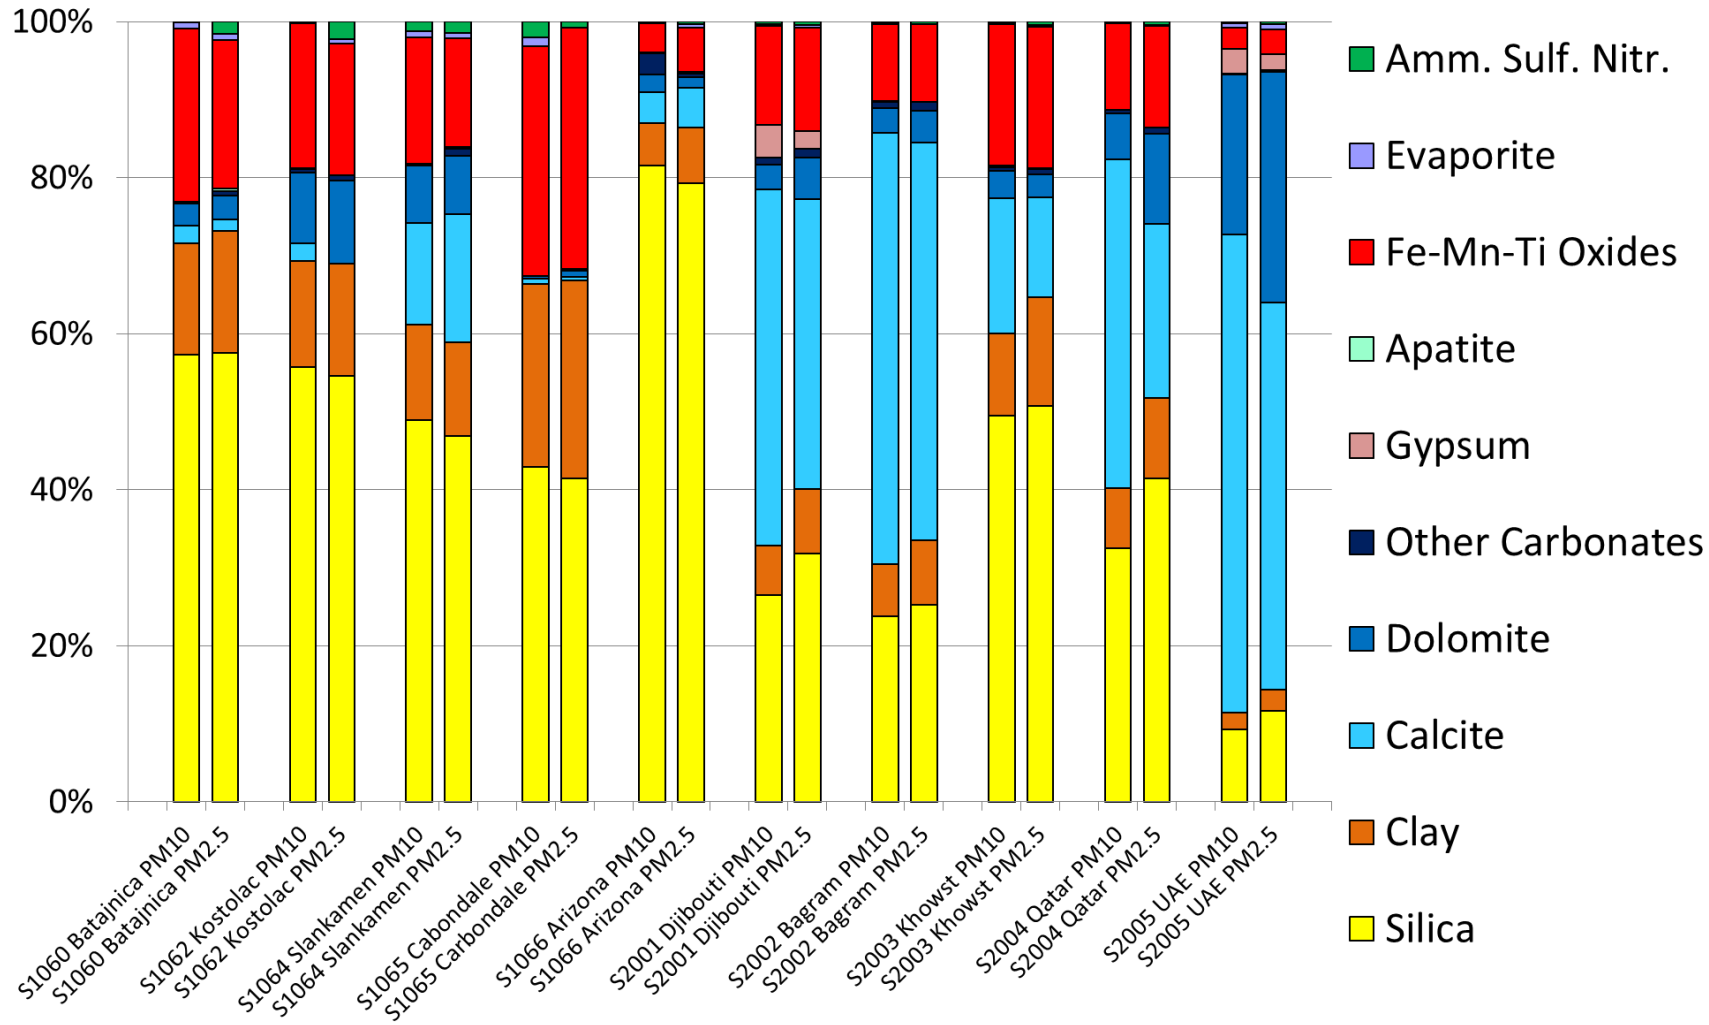

Supplement S4.3 – Plots of Normative Mineral Concentrations (mass %) Calculated from Filter Chemistry, Normalized to 100%

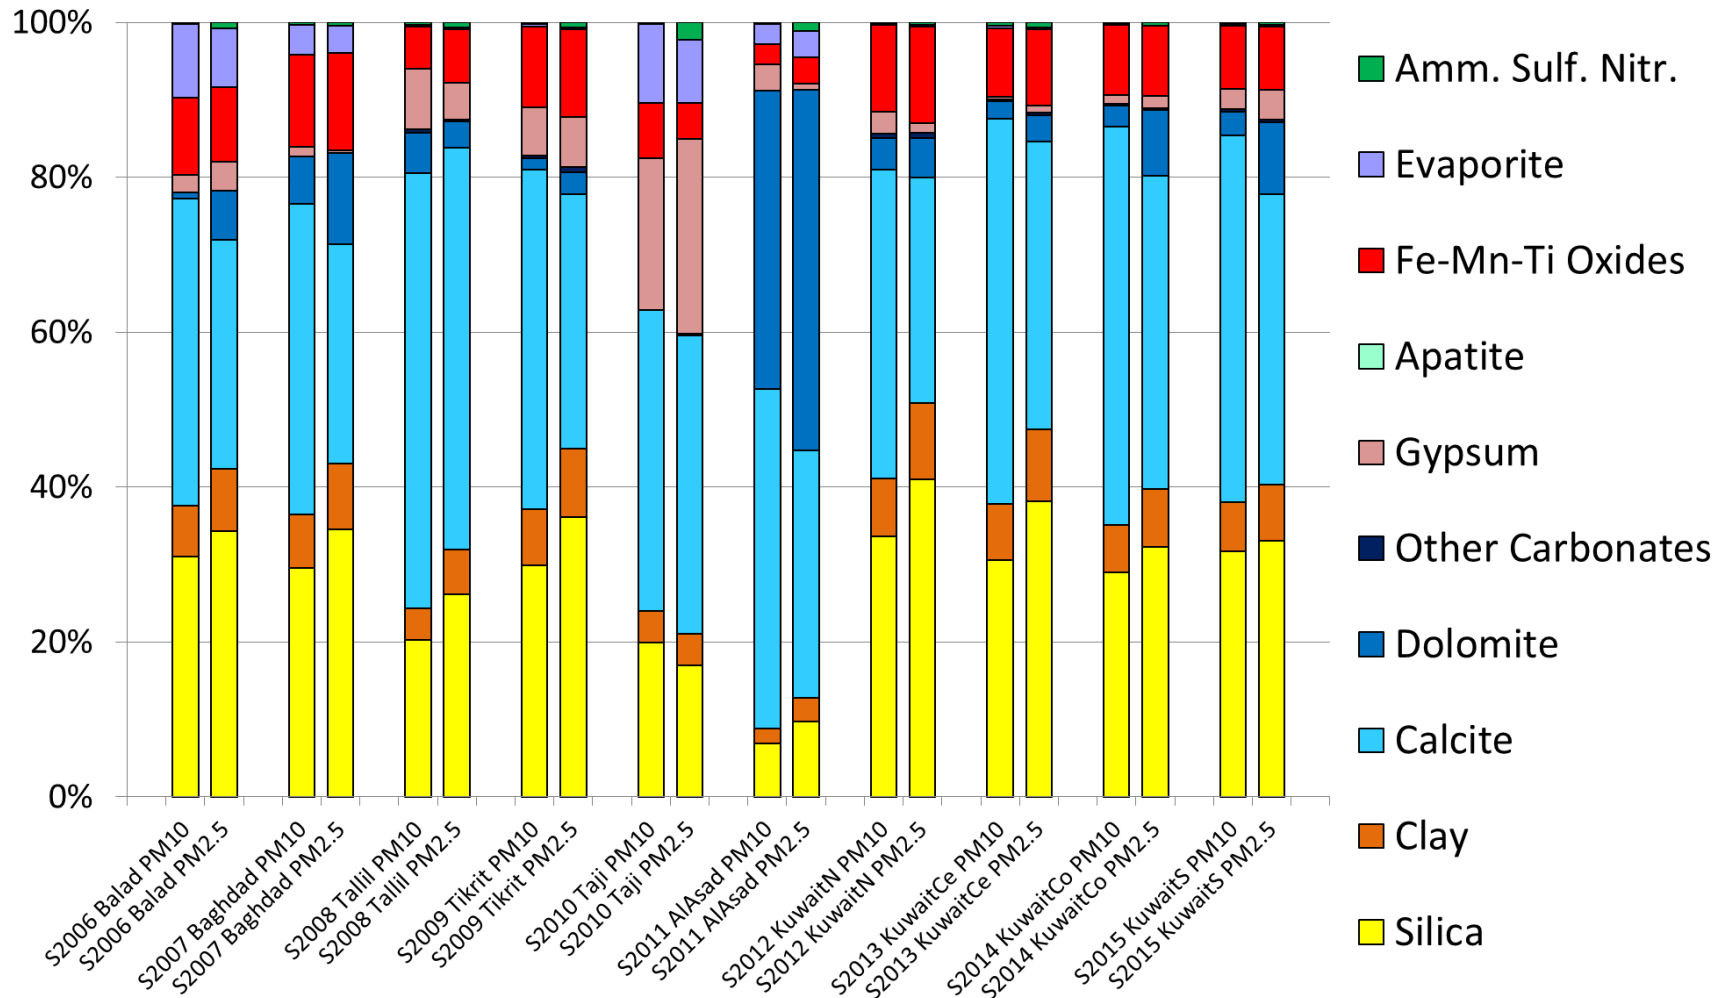

Supplement S4.3 – Plots of Normative Mineral Concentrations (mass %) Calculated from Filter Chemistry, Normalized to 100%

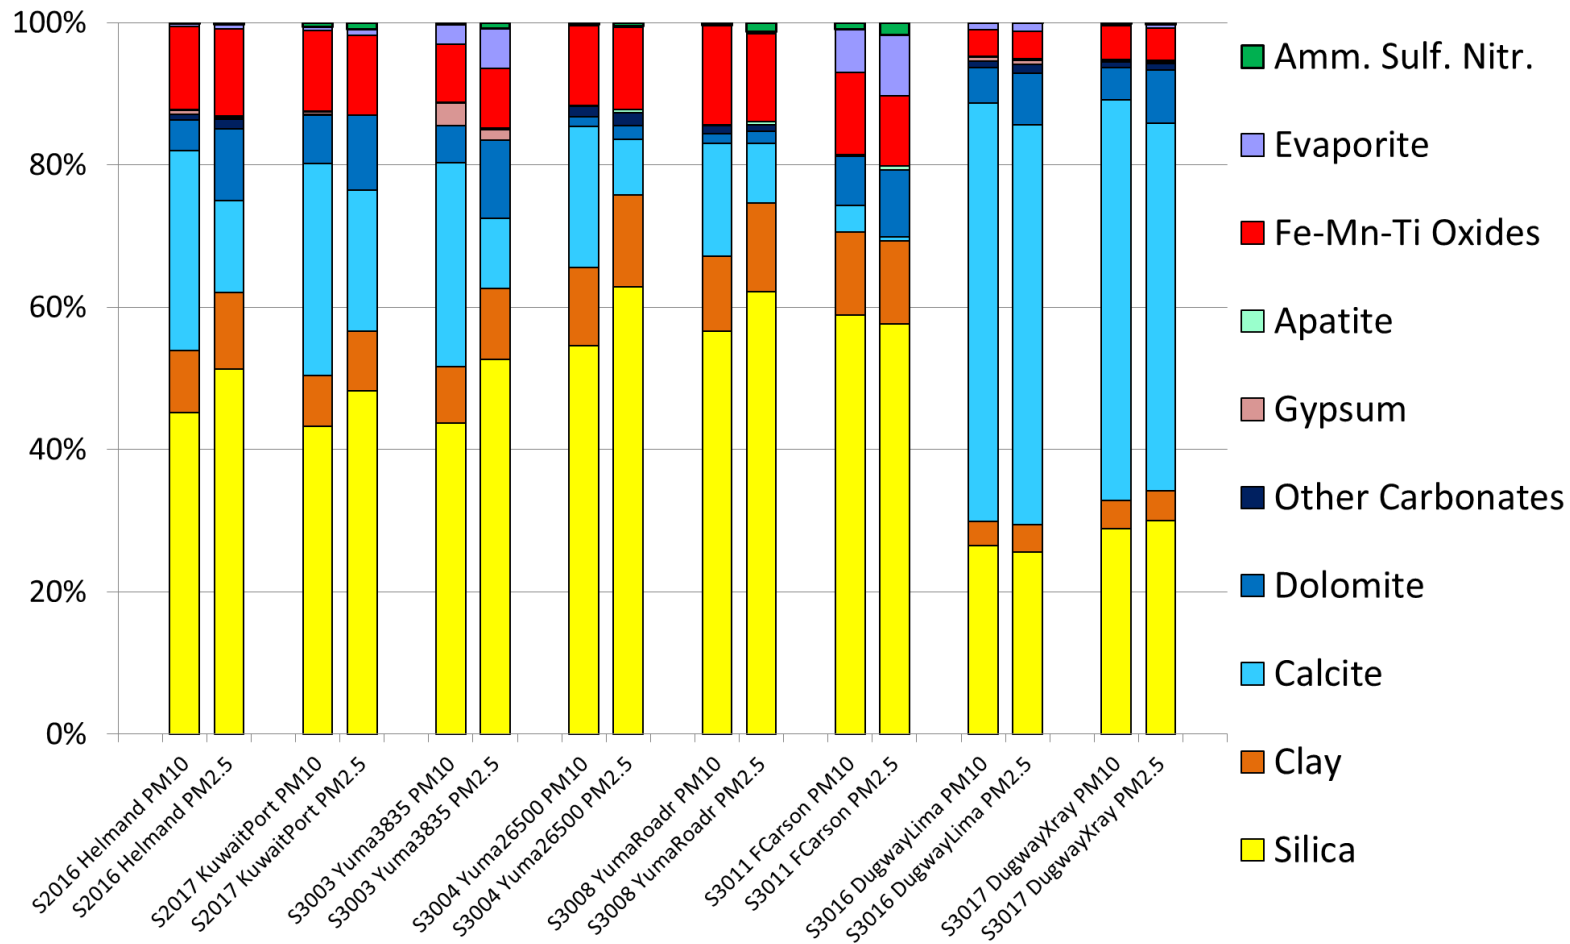

Supplement S4.4 – Scatter Plots of Major Chemical Mass Components

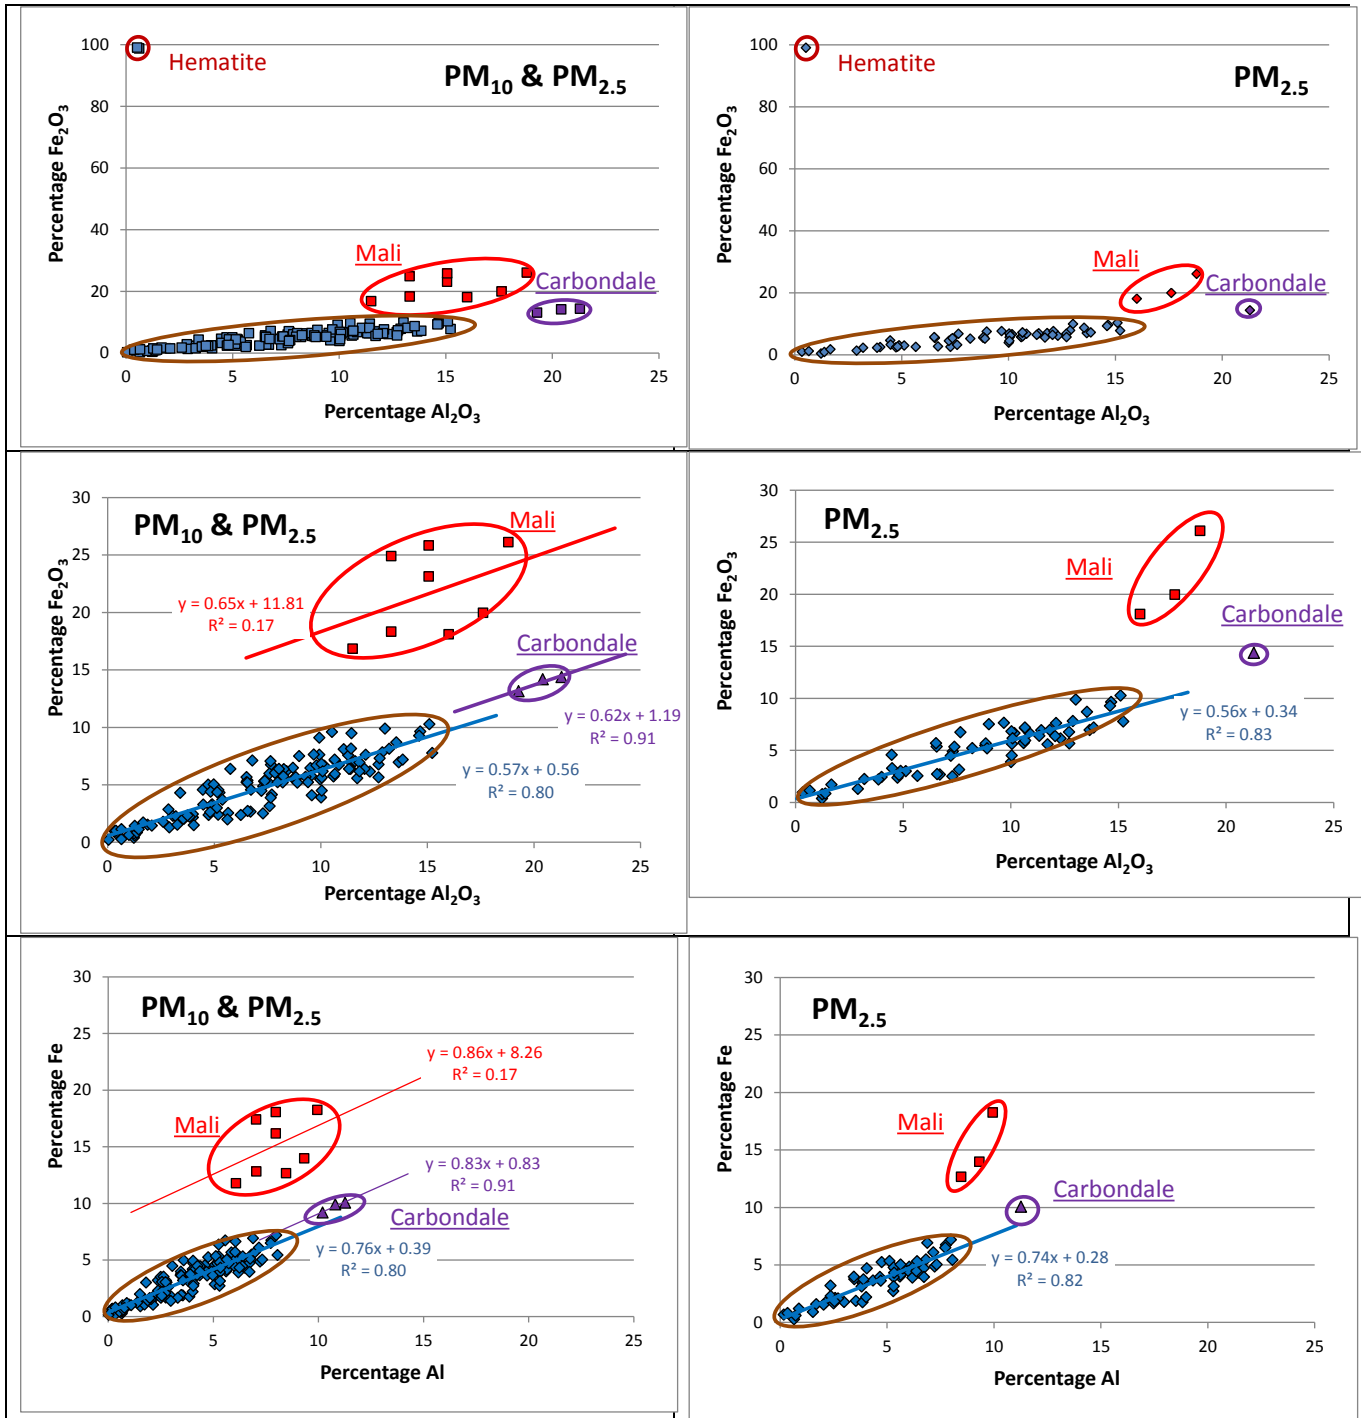



Supplement S4.4 – Scatter Plots of Major Chemical Mass Components

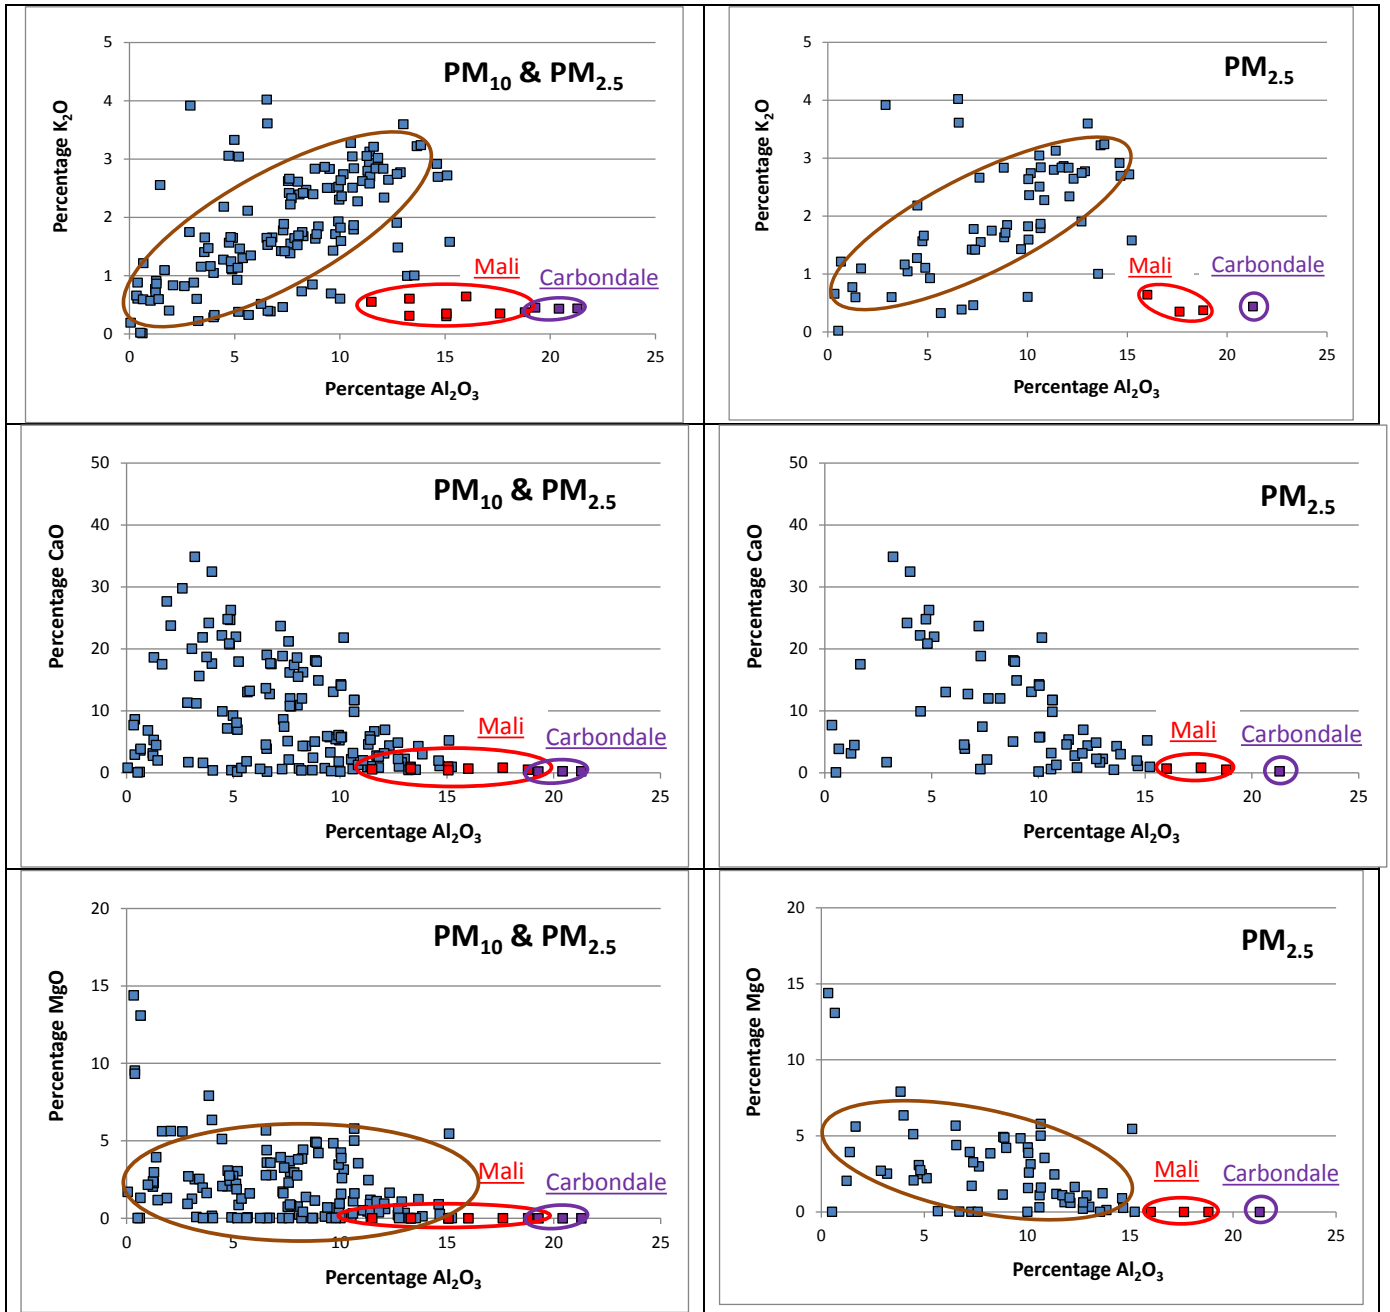

Supplement S4.4 – Scatter Plots of Major Chemical Mass Components

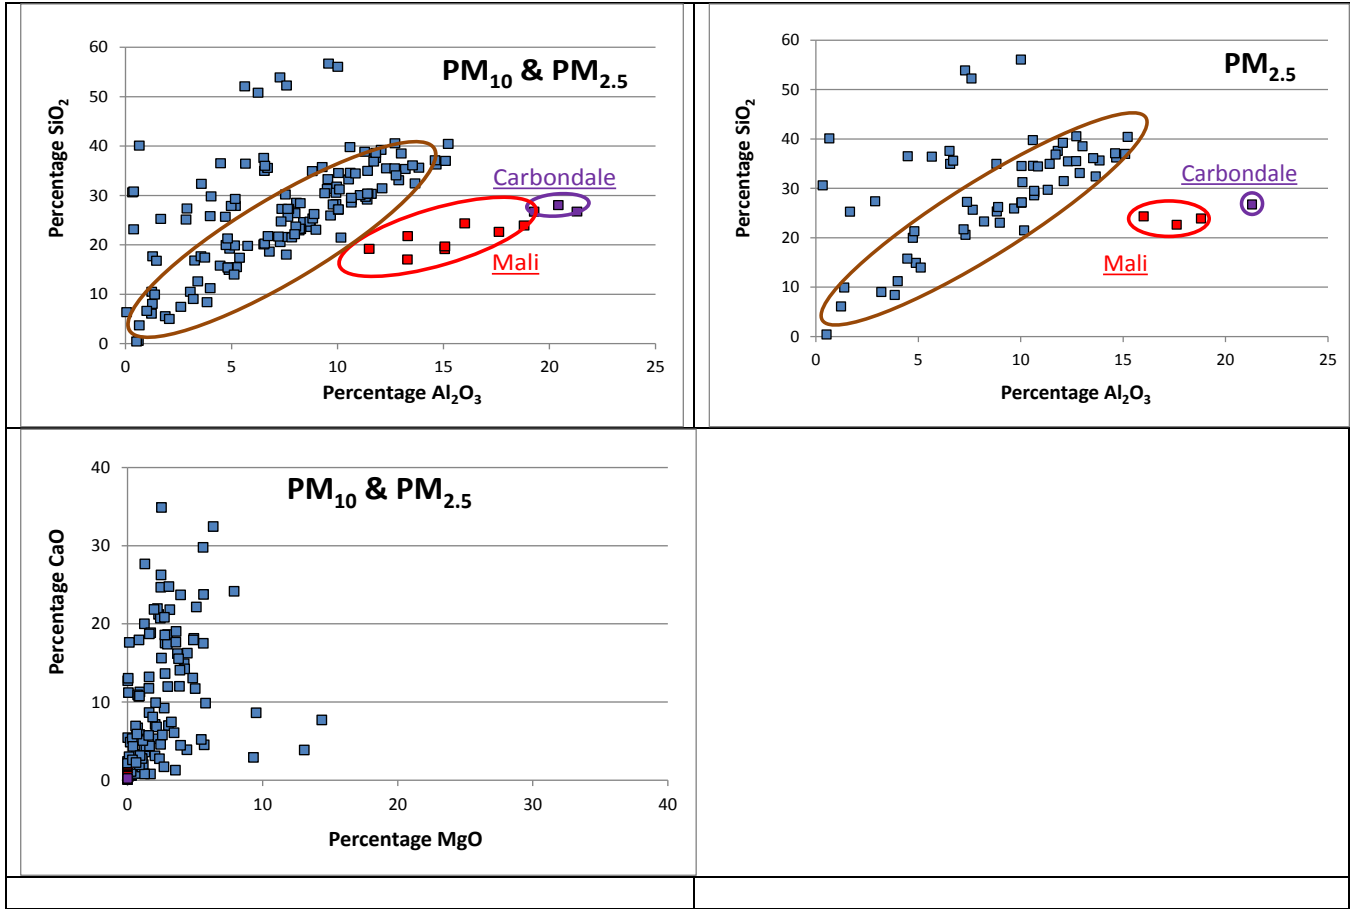

Supplement S4.5 – Relationships of SSA with Dust Chemical Mass Composition

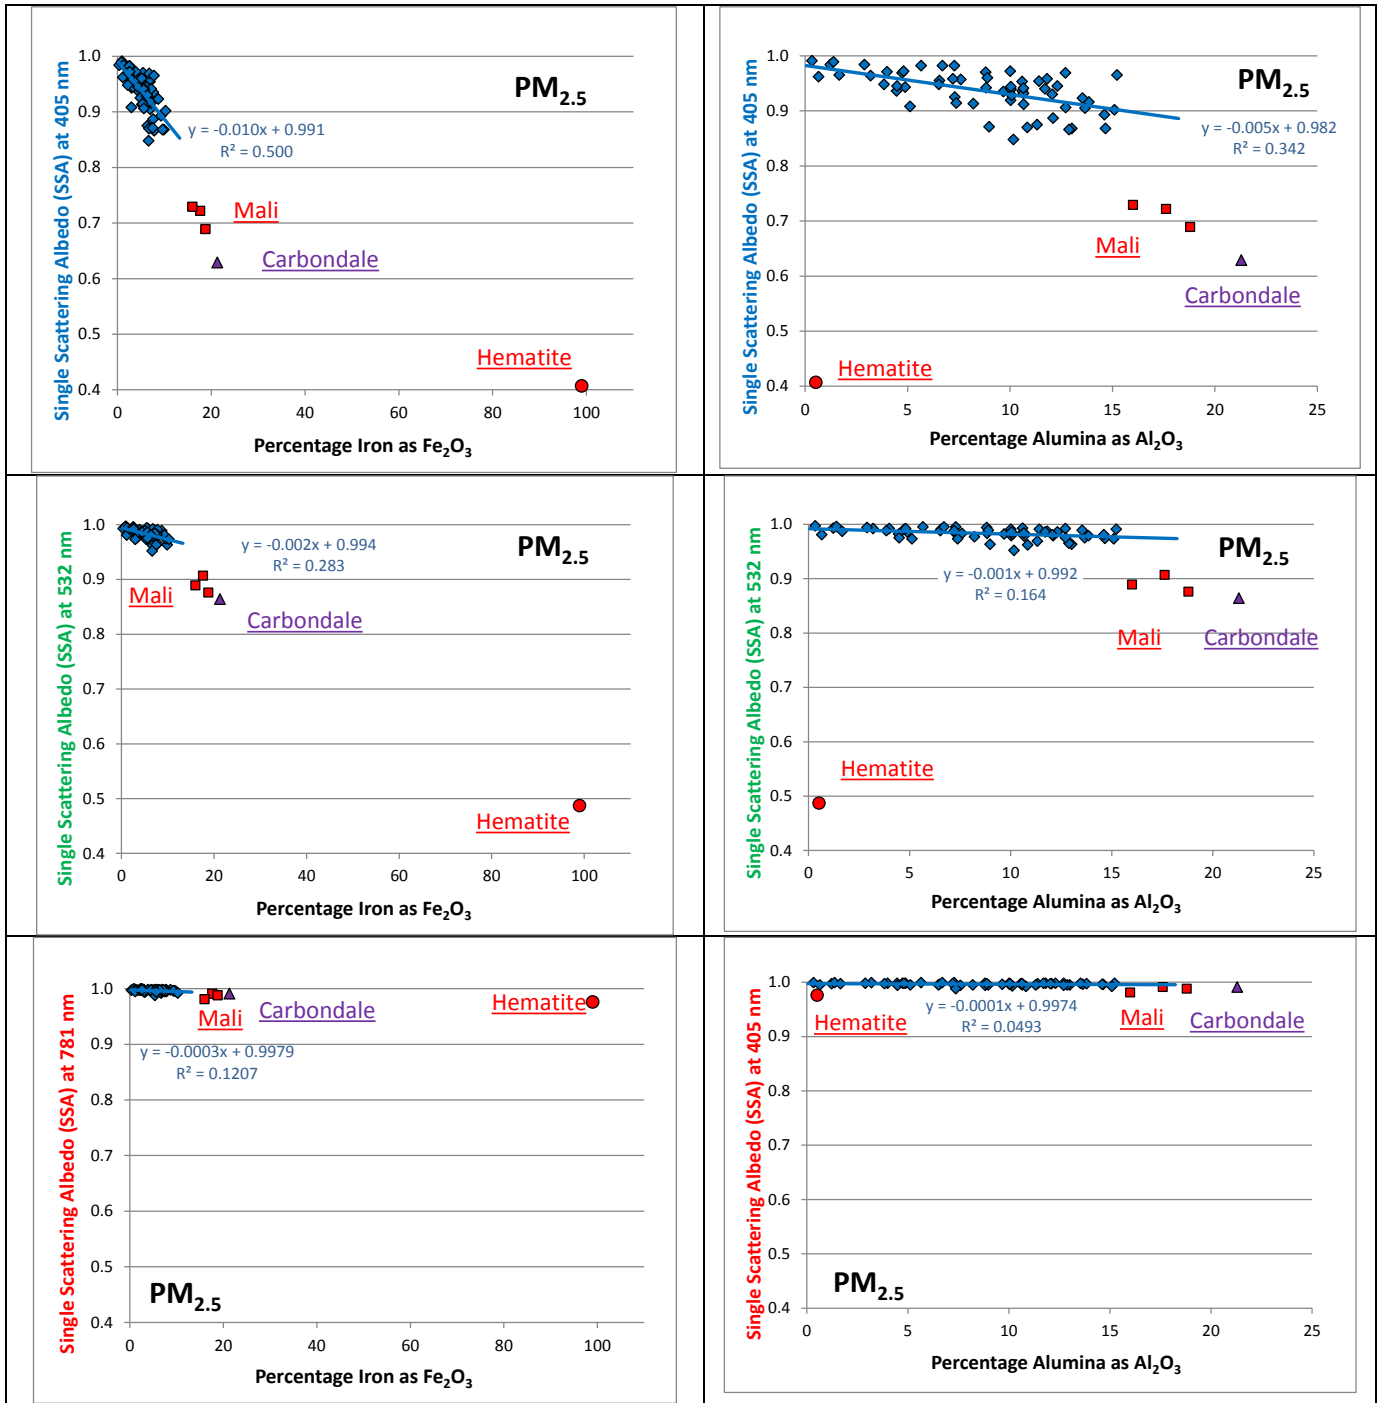

## Supplement S4.6 – Elemental Mass Ratios for PM10 & PM2.5

| Sample | Locality                                     | Si/Al |       | Ti/Al |       | Fe/Al  |        | Mg/Al |       | Ca/Al |       | K/Al |       |
|--------|----------------------------------------------|-------|-------|-------|-------|--------|--------|-------|-------|-------|-------|------|-------|
|        |                                              | PM10  | PM2.5 | PM10  | PM2.5 | PM10   | PM2.5  | PM10  | PM2.5 | PM10  | PM2.5 | PM10 | PM2.5 |
| S1000  | Unspecified                                  | 0.76  | 0.70  | 0.00  | 0.00  | 213.62 | 252.15 | 0.00  | 0.00  | 0.28  | 0.13  | 0.02 | 0.06  |
| S1005  | Spain, Lanzarote, La Mala, Sample 1          | 3.02  | 2.69  | 0.08  | 0.06  | 0.99   | 0.82   | 0.61  | 0.32  | 8.82  | 7.26  | 0.45 | 0.35  |
| S1006  | Spain, Lanzarote, La Mala, Sample 2          | 2.60  | 2.49  | 0.09  | 0.07  | 1.07   | 0.93   | 1.07  | 0.55  | 19.85 | 14.72 | 0.33 | 0.29  |
| S1007  | Spain, Lanzarote, Mirador del Rio            | 3.26  | 3.12  | 0.22  | 0.18  | 1.67   | 1.35   | 0.93  | 0.57  | 6.19  | 6.70  | 0.53 | 0.45  |
| S1008  | Spain, Lanzarote, Vega de Femes              | 2.79  | 2.61  | 0.18  | 0.15  | 1.21   | 1.00   | 0.22  | 0.15  | 0.28  | 0.23  | 0.49 | 0.43  |
| S1009  | Mali, above Bamako                           | 1.12  | 1.14  | 0.05  | 0.05  | 2.03   | 1.50   | 0.25  | 0.16  | 0.09  | 0.06  | 0.03 | 0.03  |
| S1010  | Mali, Bamako                                 | 1.44  | 1.34  | 0.07  | 0.06  | 1.82   | 1.50   | 0.26  | 0.18  | 0.07  | 0.06  | 0.07 | 0.06  |
| S1011  | Mali, West Bomako                            | 1.15  | 1.12  | 0.07  | 0.05  | 2.27   | 1.84   | 0.28  | 0.18  | 0.04  | 0.04  | 0.04 | 0.03  |
| S1013  | Cape Verde, Sala Is, Punta Fiure, Site A     | 2.60  | 2.49  | 0.10  | 0.08  | 1.09   | 0.88   | 0.39  | 0.23  | 4.62  | 3.48  | 0.44 | 0.38  |
| S1014  | China, Karamay 1                             | 2.91  | 2.70  | 0.07  | 0.06  | 0.90   | 0.80   | 0.18  | 0.13  | 0.82  | 0.63  | 0.47 | 0.43  |
| S1016  | China, Karamay 2                             | 3.08  | 2.88  | 0.07  | 0.06  | 0.80   | 0.72   | 0.16  | 0.13  | 0.46  | 0.40  | 0.41 | 0.37  |
| S1017  | China, Xinjiang Sample 1                     | 4.74  | 4.71  | 0.08  | 0.07  | 1.16   | 1.08   | 0.42  | 0.31  | 1.81  | 0.80  | 0.92 | 0.86  |
| S1018  | China, Xinjiang Sample 2                     | 3.40  | 3.32  | 0.08  | 0.07  | 0.81   | 0.71   | 0.16  | 0.13  | 0.11  | 0.07  | 0.48 | 0.45  |
| S1019  | USA, Owens Lake CA                           | 4.94  | 5.09  | 0.10  | 0.07  | 1.33   | 1.15   | 0.51  | 0.33  | 2.50  | 0.93  | 1.05 | 0.97  |
| S1022  | Namibia, Etosha, Fischer Pan                 | 53.39 | 80.76 | 0.23  | 0.29  | 2.72   | 3.78   | 13.43 | 21.35 | 30.34 | 30.98 | 2.48 | 3.08  |
| S1023  | Namibia, Etosha, Stinkwater                  | 5.05  | 4.36  | 0.06  | 0.03  | 0.55   | 0.41   | 1.59  | 0.63  | 7.50  | 3.42  | 1.44 | 0.98  |
| S1024  | Namibia, Etosha, Lookout                     | 5.83  | 6.35  | 0.05  | 0.04  | 0.83   | 0.81   | 1.57  | 1.11  | 9.15  | 4.37  | 0.89 | 0.68  |
| S1025  | Morocco, Lake Iriki                          | 2.26  | 2.10  | 0.07  | 0.06  | 0.74   | 0.67   | 0.12  | 0.09  | 0.69  | 0.42  | 0.40 | 0.37  |
| S1027  | Spain, Gran Canaria, Galdar                  | 3.04  | 2.81  | 0.16  | 0.13  | 0.89   | 0.78   | 0.15  | 0.12  | 0.11  | 0.10  | 0.42 | 0.38  |
| S1033  | Fuerteventura, Pozo Negro, Sample 1          | 2.59  | 2.32  | 0.11  | 0.08  | 0.98   | 0.74   | 0.22  | 0.12  | 0.70  | 0.54  | 0.46 | 0.39  |
| S1034  | Fuerteventura, Pozo Negro, Sample 2          | 2.51  | 2.27  | 0.13  | 0.10  | 1.01   | 0.80   | 0.19  | 0.12  | 0.24  | 0.17  | 0.40 | 0.34  |
| S1035  | Spain, Fuerteventura, La Ampuyenta           | 2.39  | 2.27  | 0.09  | 0.07  | 0.84   | 0.69   | 0.18  | 0.09  | 0.37  | 0.29  | 0.43 | 0.37  |
| S1038  | Botswana, Makgadikgadi, Mopipi               | 7.77  | 7.19  | 0.08  | 0.06  | 1.32   | 0.97   | 0.87  | 0.41  | 5.33  | 2.98  | 0.96 | 0.76  |
| S1039  | Botswana, Makgadikgadi, Rakops               | 12.20 | 13.40 | 0.05  | 0.05  | 1.47   | 1.35   | 2.17  | 1.54  | 19.66 | 14.19 | 1.06 | 1.03  |
| S1040  | Botswana, Nxai Pan, Baines Baobabs           | 10.14 | 8.34  | 0.10  | 0.06  | 1.00   | 0.59   | 1.30  | 0.39  | 1.83  | 0.80  | 2.74 | 2.12  |
| S1041  | Botswana, Nxai Pan                           | 70.13 | 54.13 | 0.29  | 0.15  | 3.38   | 2.31   | 16.45 | 6.67  | 10.11 | 7.94  | 3.56 | 2.91  |
| S1042  | Chile, Atacama, Rock Garden                  | 2.82  | 2.55  | 0.05  | 0.04  | 0.73   | 0.66   | 0.14  | 0.10  | 0.71  | 0.48  | 0.36 | 0.34  |
| S1045  | USA, Black Rock playa, NV                    | 3.54  | 3.50  | 0.06  | 0.06  | 0.92   | 0.82   | 0.23  | 0.18  | 0.91  | 0.77  | 0.54 | 0.50  |
| S1049  | Chad, Bodélé Depression, Sample 44           | 4.54  | 4.69  | 0.06  | 0.05  | 0.62   | 0.53   | 0.36  | 0.15  | 4.62  | 2.56  | 0.10 | 0.09  |
| S1050  | Chad, Bodélé Depression, Sample 44B          | 5.69  | 5.68  | 0.06  | 0.05  | 0.71   | 0.59   | 0.34  | 0.20  | 5.94  | 3.11  | 0.11 | 0.09  |
| S1051  | Chad, Bodélé Depression, Sample 44C          | 5.23  | 4.94  | 0.07  | 0.06  | 0.56   | 0.51   | 0.11  | 0.10  | 0.03  | 0.03  | 0.11 | 0.09  |
| S1052  | USA, Reno NV, Peavine Mtn, white clay        | 7.18  | 6.53  | 0.05  | 0.05  | 0.50   | 0.45   | 0.15  | 0.12  | 0.13  | 0.11  | 0.13 | 0.10  |
| S1053  | USA, Reno NV, Peavine Mtn, yellow soil       | 2.47  | 2.35  | 0.08  | 0.06  | 0.94   | 0.85   | 0.22  | 0.12  | 0.06  | 0.05  | 0.14 | 0.12  |
| S1055  | China, Lanzhou, Jiuzhoutai Mtn, loess        | 2.91  | 2.41  | 0.08  | 0.05  | 0.98   | 0.74   | 0.23  | 0.13  | 1.84  | 1.49  | 0.51 | 0.42  |
| S1056  | Australia, Lake Eyre, Cooper Creek           | 2.54  | 2.47  | 0.07  | 0.05  | 0.90   | 0.70   | 0.17  | 0.10  | 0.75  | 0.51  | 0.27 | 0.24  |
| S1057  | Australia, Lake Eyre, Warburton River        | 2.36  | 2.34  | 0.07  | 0.06  | 0.76   | 0.67   | 0.11  | 0.08  | 0.11  | 0.08  | 0.18 | 0.16  |
| S1058  | Australia, Lake Frome                        | 2.85  | 2.80  | 0.08  | 0.07  | 0.91   | 0.82   | 0.32  | 0.14  | 0.19  | 0.16  | 0.38 | 0.33  |
| S1060  | Serbia, Batajnica, Danube R, loess           | 2.34  | 2.18  | 0.08  | 0.05  | 1.09   | 0.87   | 0.18  | 0.11  | 0.12  | 0.10  | 0.37 | 0.29  |
| S1062  | Serbia, Kostolac, Lignite pit, loess         | 2.40  | 2.24  | 0.08  | 0.06  | 0.97   | 0.84   | 0.16  | 0.11  | 0.24  | 0.18  | 0.37 | 0.31  |
| S1064  | Serbia, Stari Slankamen, loess               | 2.35  | 2.30  | 0.07  | 0.05  | 0.94   | 0.83   | 0.16  | 0.13  | 0.63  | 0.77  | 0.35 | 0.30  |
| S1065  | USA, Carbondale, California, red clay        | 1.21  | 1.11  | 0.05  | 0.05  | 0.92   | 0.89   | 0.08  | 0.08  | 0.02  | 0.01  | 0.03 | 0.03  |
| S1066  | USA, Arizona Road Dust                       | 8.19  | 6.07  | 0.06  | 0.06  | 0.47   | 0.55   | 0.16  | 0.14  | 0.44  | 0.38  | 0.59 | 0.55  |
| S2001  | Djibouti, Camp Lemonnier                     | 2.42  | 2.27  | 0.13  | 0.10  | 1.38   | 1.10   | 0.39  | 0.23  | 3.49  | 2.24  | 0.38 | 0.32  |
| S2002  | Afghanistan, Bagram                          | 2.09  | 1.86  | 0.08  | 0.07  | 1.04   | 0.86   | 0.26  | 0.16  | 3.77  | 2.89  | 0.50 | 0.42  |
| S2003  | Afghanistan, Khowst                          | 2.71  | 2.16  | 0.10  | 0.09  | 1.21   | 0.90   | 0.23  | 0.11  | 0.82  | 0.46  | 0.31 | 0.28  |
| S2004  | Qatar, Al Udeid                              | 2.48  | 2.37  | 0.09  | 0.08  | 1.02   | 0.88   | 0.23  | 0.16  | 2.65  | 1.25  | 0.32 | 0.26  |
| S2005  | UAE, Al Dhafra                               | 2.51  | 2.47  | 0.07  | 0.06  | 0.89   | 0.81   | 0.65  | 0.38  | 15.41 | 10.95 | 0.49 | 0.41  |
| S2006  | Iraq, Balad                                  | 2.72  | 2.50  | 0.10  | 0.08  | 1.06   | 0.84   | 0.31  | 0.19  | 2.82  | 1.97  | 0.40 | 0.33  |
| S2007  | Iraq, Baghdad, Camp Victory                  | 2.50  | 2.37  | 0.09  | 0.07  | 1.22   | 1.04   | 0.30  | 0.20  | 2.86  | 1.82  | 0.28 | 0.23  |
| S2008  | Iraq, Tallil, Camp Adder                     | 2.81  | 2.65  | 0.10  | 0.10  | 0.87   | 0.82   | 0.34  | 0.21  | 6.86  | 4.43  | 0.36 | 0.31  |
| S2009  | Iraq, Tikrit, Speicher                       | 2.42  | 2.38  | 0.09  | 0.08  | 1.02   | 0.90   | 0.24  | 0.17  | 2.99  | 1.92  | 0.33 | 0.28  |
| S2010  | Iraq, Taji                                   | 2.81  | 2.41  | 0.10  | 0.08  | 1.20   | 0.77   | 0.47  | 0.28  | 5.79  | 5.78  | 0.40 | 0.28  |
| S2011  | Iraq, Al Asad                                | 2.12  | 1.92  | 0.08  | 0.08  | 0.92   | 0.76   | 0.84  | 0.37  | 15.48 | 8.48  | 0.63 | 0.47  |
| S2012  | Kuwait, North, Camp Buehring                 | 2.60  | 2.44  | 0.09  | 0.08  | 1.05   | 0.89   | 0.25  | 0.16  | 2.61  | 1.48  | 0.33 | 0.27  |
| S2013  | Kuwait, Central, Camp Ali Al Salem           | 2.45  | 2.39  | 0.07  | 0.06  | 0.87   | 0.74   | 0.21  | 0.14  | 3.14  | 1.89  | 0.30 | 0.25  |
| S2014  | Kuwait, Coastal, Ash Shu Ayabah              | 2.72  | 2.53  | 0.09  | 0.08  | 1.04   | 0.85   | 0.30  | 0.18  | 3.91  | 2.77  | 0.36 | 0.29  |
| S2015  | Kuwait, South, Camp Arifjan                  | 2.86  | 2.60  | 0.08  | 0.07  | 0.90   | 0.77   | 0.25  | 0.16  | 3.54  | 2.72  | 0.37 | 0.30  |
| S2016  | Afghanistan, Camp Leatherneck                | 2.98  | 2.74  | 0.07  | 0.06  | 0.96   | 0.81   | 0.25  | 0.15  | 1.59  | 0.77  | 0.40 | 0.37  |
| S2017  | Kuwait, Shuaiba Port                         | 3.41  | 3.27  | 0.08  | 0.06  | 1.12   | 0.96   | 0.41  | 0.25  | 2.11  | 1.36  | 0.35 | 0.30  |
| S3003  | USA, YPG, Yuma AZ, Area 3835Z                | 3.15  | 3.04  | 0.06  | 0.05  | 0.67   | 0.59   | 0.17  | 0.11  | 1.90  | 0.77  | 0.46 | 0.41  |
| S3004  | USA, YPG, Yuma, AZ, Area 26500R              | 2.86  | 2.78  | 0.05  | 0.05  | 0.73   | 0.63   | 0.15  | 0.10  | 0.84  | 0.32  | 0.42 | 0.38  |
| S3008  | USA, YPG, Yuma AZ, Roadrunner Site           | 3.04  | 2.87  | 0.08  | 0.06  | 0.92   | 0.70   | 0.21  | 0.11  | 0.70  | 0.35  | 0.46 | 0.37  |
| S3011  | USA, Ft Carson CO                            | 2.89  | 2.82  | 0.06  | 0.05  | 0.69   | 0.59   | 0.11  | 0.09  | 0.30  | 0.24  | 0.40 | 0.34  |
| S3016  | USA, Dugway PG, Utah, Lima Site              | 4.39  | 3.72  | 0.07  | 0.05  | 0.76   | 0.66   | 0.40  | 0.26  | 8.28  | 7.05  | 0.62 | 0.52  |
| S3017  | USA, Dugway PG, Utah, X-ray Site             | 4.10  | 3.91  | 0.07  | 0.06  | 0.82   | 0.72   | 0.41  | 0.28  | 6.74  | 5.84  | 0.62 | 0.54  |
|        | <b>Minimum</b>                               | 0.76  | 0.70  | 0.00  | 0.00  | 0.47   | 0.41   | 0.00  | 0.00  | 0.02  | 0.01  | 0.02 | 0.03  |
|        | <b>Maximum</b>                               | 70.13 | 80.76 | 0.29  | 0.29  | 213.62 | 252.15 | 16.45 | 21.35 | 30.34 | 30.98 | 3.56 | 3.08  |
|        | <b>Geometric Mean</b>                        | 3.31  | 3.11  | 0.07  | 0.06  | 1.08   | 0.92   | 0.28  | 0.18  | 1.21  | 0.83  | 0.37 | 0.32  |
|        | <b>Arithmetic Mean</b>                       | 5.21  | 5.19  | 0.09  | 0.07  | 4.33   | 4.77   | 0.83  | 0.65  | 3.80  | 2.77  | 0.54 | 0.47  |
|        | <b>Relative differences in PM10 vs PM2.5</b> |       | 6     |       | 19    |        | 15     |       | 36    |       | 31    |      | 13    |

Supplement S5.1 – SEM-based Individual Particle Analysis – Summary Tables – 29 Chemical Categories

| <b>29 Chemical categories</b>                                                           |                  |                  |                  |                  |              |              |              |                 |                |                |                 |                 |                 |                 |                 |                 |                |                     |                      |                      |
|-----------------------------------------------------------------------------------------|------------------|------------------|------------------|------------------|--------------|--------------|--------------|-----------------|----------------|----------------|-----------------|-----------------|-----------------|-----------------|-----------------|-----------------|----------------|---------------------|----------------------|----------------------|
| <b>Average weight percentage of approximately 1,000 individual particles per sample</b> |                  |                  |                  |                  |              |              |              |                 |                |                |                 |                 |                 |                 |                 |                 |                |                     |                      |                      |
|                                                                                         | S1005            | S1006            | S1007            | S1008            | S1009        | S1010        | S1011        | S1013           | S1014          | S1016          | S1017           | S1018           | S1019           | S1022           | S1023           | S1024           | S1025          | S1027               | S1033                | S1034                |
| Si-rich                                                                                 | 0.8              | 1.2              | 1.1              | 2.4              | 1.9          | 1.8          | 0.0          | 1.6             | 2.9            | 2.8            | 1.2             | 4.2             | 1.5             | 0.0             | 0.0             |                 | 4.0            | 1.2                 | 1.0                  | 1.9                  |
| Si/Al(Ca,Mg)                                                                            | 1.3              | 3.9              | 2.5              | 0.0              |              | 0.0          | 0.0          | 7.1             | 0.4            | 0.2            | 0.2             | 0.0             | 0.3             | 0.4             | 2.0             | 1.5             | 0.1            |                     | 4.1                  | 0.1                  |
| Si/Al(Ca,Mg,Fe)                                                                         | 0.3              | 1.5              | 1.2              | 0.2              | 0.2          | 0.0          |              | 6.3             | 0.8            | 1.0            | 0.3             | 0.6             | 1.1             | 2.6             |                 | 0.1             | 0.0            | 0.2                 | 0.9                  | 1.9                  |
| Si/Al(Ca,Mg,K,Fe)                                                                       | 8.8              | 1.9              | 17.1             | 3.2              |              |              |              | 8.2             | 6.2            | 1.8            | 1.4             | 0.0             | 0.4             |                 |                 | 0.0             | 4.5            | 1.6                 | 7.6                  | 1.6                  |
| Si/Al(K,Fe)                                                                             |                  |                  |                  | 10.3             | 2.2          | 0.1          | 2.4          | 0.2             | 1.7            | 1.0            | 0.3             | 1.5             | 0.0             |                 |                 |                 | 2.1            | 2.6                 | 0.3                  | 2.6                  |
| Si/Al(Mg,Fe)                                                                            | 0.4              | 0.6              | 0.9              | 0.8              | 0.6          | 1.3          | 0.2          | 1.3             | 8.2            | 6.8            | 5.6             | 10.6            | 0.4             | 0.0             | 0.1             | 0.0             | 2.2            | 5.6                 | 2.0                  | 4.6                  |
| Si/Al(Mg,K)                                                                             | 0.3              | 0.3              | 2.3              | 0.3              | 0.0          | 0.0          | 0.1          | 1.4             | 4.7            | 7.2            | 6.0             | 4.1             | 5.9             | 2.6             | 0.6             | 0.3             | 8.3            | 1.3                 | 8.4                  | 6.0                  |
| Si/Al(Mg,K,Fe)                                                                          | 2.1              | 0.8              | 9.3              | 44.7             | 0.2          | 1.1          | 0.1          | 3.7             | 28.6           | 32.7           | 24.7            | 27.6            | 23.1            | 0.0             |                 | 0.1             | 28.1           | 70.9                | 26.3                 | 29.1                 |
| Si/Al/Ca                                                                                | 8.3              | 0.7              | 5.0              | 1.6              | 0.1          | 1.6          | 0.0          | 7.5             | 1.1            | 1.6            | 1.1             | 0.2             | 0.5             | 0.0             | 0.0             | 0.0             | 1.8            | 0.0                 | 4.3                  | 1.7                  |
| Si/Al/Fe                                                                                | 2.1              | 0.3              | 0.7              | 3.9              | 49.2         | 45.5         | 50.5         | 0.2             | 0.6            | 0.9            | 0.5             | 0.5             | 0.1             |                 |                 | 0.2             | 2.6            | 0.9                 | 0.7                  | 7.6                  |
| Si/Al/K                                                                                 | 4.8              | 0.0              | 1.1              | 11.0             | 0.4          | 0.3          | 1.0          | 2.3             | 13.0           | 10.9           | 5.6             | 16.2            | 5.1             | 0.9             | 0.7             | 0.5             | 13.8           | 3.5                 | 4.2                  | 6.5                  |
| Si/Al/Mg                                                                                | 5.6              | 4.2              | 3.7              | 1.1              | 0.5          | 0.5          | 0.1          | 2.4             | 6.2            | 5.6            | 22.9            | 5.1             | 32.1            | 0.6             | 7.9             | 6.0             | 5.8            | 2.2                 | 22.2                 | 9.0                  |
| Si/Al/Na                                                                                | 0.6              | 0.2              | 0.1              | 1.2              | 0.0          | 0.0          | 0.0          | 2.5             | 7.3            | 5.7            | 3.5             | 12.5            | 3.8             | 0.1             | 1.3             | 1.2             | 0.7            | 0.5                 | 1.5                  | 3.6                  |
| Si/Al                                                                                   | 0.8              | 0.0              | 0.4              | 6.1              | 6.6          | 10.2         | 11.7         | 0.6             | 3.0            | 4.7            | 1.2             | 3.8             | 0.2             |                 | 0.0             | 0.0             | 4.3            | 1.9                 | 1.3                  | 5.4                  |
| Mixed Clays                                                                             | 0.4              | 0.4              | 1.4              | 4.7              | 2.4          | 4.3          | 2.3          | 1.1             | 7.5            | 8.4            | 8.0             | 10.6            | 3.1             | 0.0             | 1.0             | 1.5             | 5.0            | 6.9                 | 3.4                  | 5.3                  |
| Si/Mg                                                                                   |                  |                  |                  |                  |              | 0.0          | 0.0          |                 | 0.0            | 0.0            | 11.6            | 0.0             | 10.8            | 54.8            | 1.7             | 3.7             | 0.0            |                     | 0.0                  | 0.4                  |
| Si/Mg/Ca                                                                                |                  | 0.0              | 0.3              |                  |              | 0.0          |              | 0.0             | 0.0            | 0.0            | 0.5             | 0.0             | 0.1             | 14.3            | 0.0             | 2.9             |                |                     | 0.2                  | 0.0                  |
| Ca/Mg/Si                                                                                | 2.8              | 3.9              | 20.6             |                  |              |              |              | 0.0             | 0.2            | 0.0            | 0.2             | 0.2             |                 | 1.0             | 8.4             | 3.1             | 9.9            | 2.8                 |                      | 0.6                  |
| Ca-rich                                                                                 | 15.7             | 49.5             | 4.3              | 0.4              | 0.7          | 0.0          |              |                 | 2.0            | 0.4            | 2.4             | 0.1             | 2.9             | 2.6             | 0.6             | 4.6             | 2.3            |                     | 1.5                  | 0.2                  |
| Ca/Mg                                                                                   | 2.0              | 5.1              | 14.0             |                  |              | 0.0          |              | 0.0             | 0.0            | 0.0            |                 | 0.4             |                 | 0.5             | 6.0             | 7.5             | 0.0            |                     | 0.0                  | 0.0                  |
| Ca/Si/Al                                                                                | 17.6             | 8.2              | 2.4              | 0.1              | 0.1          | 0.8          | 0.1          | 5.1             | 1.5            | 3.2            | 0.0             | 0.1             | 0.0             | 0.0             | 0.0             | 0.0             | 5.6            |                     | 3.6                  | 0.3                  |
| Ca/Si                                                                                   | 23.8             | 13.4             | 4.4              | 0.6              | 0.0          | 0.0          | 0.1          | 6.4             | 2.9            | 3.0            | 1.7             | 0.0             | 3.8             | 5.9             | 0.4             | 1.9             | 1.8            | 0.1                 | 3.5                  | 0.1                  |
| Ca/P                                                                                    | 0.0              | 1.5              | 0.0              | 0.0              |              |              | 0.0          | 39.9            | 0.1            | 0.2            | 0.5             | 0.1             |                 |                 | 0.0             | 0.0             | 0.0            |                     | 0.0                  | 0.1                  |
| Fe/Si                                                                                   | 0.4              | 2.1              | 3.5              | 5.9              | 33.3         | 30.4         | 27.1         | 0.5             | 1.1            | 1.4            | 0.0             | 0.3             | 1.8             | 0.0             |                 | 0.1             | 1.2            | 0.5                 | 1.8                  | 3.3                  |
| Fe-rich                                                                                 | 0.6              | 0.3              | 1.8              | 0.4              | 0.5          | 1.3          | 3.2          | 0.0             | 0.0            | 0.0            |                 | 0.1             | 0.0             | 0.0             | 0.0             | 0.0             | 0.0            | 0.0                 | 0.0                  | 7.9                  |
| Na/S                                                                                    |                  |                  |                  |                  |              |              |              |                 |                | 0.0            | 0.3             | 0.4             | 1.5             | 2.7             | 69.8            | 54.4            |                |                     |                      |                      |
| Na-rich                                                                                 |                  |                  |                  |                  |              | 0.0          |              |                 |                |                |                 |                 | 0.3             | 1.0             | 3.2             | 1.9             |                |                     | 0.0                  | 0.0                  |
| C-rich                                                                                  | 0.0              | 0.0              | 0.0              |                  |              |              |              |                 | 0.1            | 0.0            | 0.1             | 0.0             |                 |                 | 0.1             | 0.0             | 0.0            |                     | 0.0                  | 0.0                  |
| Misc.                                                                                   | 0.3              | 0.3              | 2.0              | 1.1              | 1.1          | 0.5          | 1.1          | 1.5             | 0.1            | 0.4            | 0.5             | 1.0             | 0.0             | 2.6             | 1.5             | 1.6             | 2.7            | 0.2                 | 0.4                  | 0.9                  |
| Total                                                                                   | 100.0            | 100.0            | 100.0            | 100.0            | 100.0        | 100.0        | 100.0        | 100.0           | 100.0          | 100.0          | 100.0           | 100.0           | 100.0           | 100.0           | 100.0           | 100.0           | 100.0          | 100.0               | 100.0                | 100.0                |
| Country \Region                                                                         | Spain \Lanzarote | Spain \Lanzarote | Spain \Lanzarote | Spain \Lanzarote | Mali \Bamako | Mali \Bamako | Mali \Bamako | Cape Verde \Sal | China \Karamay | China \Karamay | China \Xinjiang | China \Xinjiang | USA \California | Namibia \Etosha | Namibia \Etosha | Namibia \Etosha | Morocco \Irkki | Spain \Gran Canaria | Spain \Fuerteventura | Spain \Fuerteventura |

Supplement S5.1 – SEM-based Individual Particle Analysis – Summary Tables – 29 Chemical Categories

| 29 Chemical categories                                                           |                     |                        |                        |                 |               |               |            |             |             |             |            |            |               |                |                |                 |                  |                 |                      |                |             |                    |      |
|----------------------------------------------------------------------------------|---------------------|------------------------|------------------------|-----------------|---------------|---------------|------------|-------------|-------------|-------------|------------|------------|---------------|----------------|----------------|-----------------|------------------|-----------------|----------------------|----------------|-------------|--------------------|------|
| Average weight percentage of approximately 1,000 individual particles per sample |                     |                        |                        |                 |               |               |            |             |             |             |            |            |               |                |                |                 |                  |                 |                      |                |             |                    |      |
|                                                                                  | S1035               | S1038                  | S1039                  | S1040           | S1041         | S1042         | S1045      | S1049       | S1050       | S1051       | S1052      | S1053      | S1055         | S1056          | S1057          | S1058           | S1060            | S1062           | S1064                | S1065          | S1066       | S2001              |      |
| Si-rich                                                                          | 1.0                 | 2.7                    | 4.0                    | 2.1             | 0.8           | 0.3           | 1.7        | 16.8        | 4.9         | 17.0        | 25.6       | 1.7        | 4.5           | 1.9            | 1.5            | 4.1             | 1.3              | 4.2             | 2.2                  | 0.1            | 36.9        | 0.5                |      |
| Si/Al(Ca,Mg)                                                                     | 0.3                 | 9.2                    | 7.8                    |                 | 0.4           | 8.4           | 0.4        | 0.4         | 0.0         | 0.0         |            | 0.0        | 0.4           | 0.3            | 0.1            | 0.0             | 0.0              | 0.0             | 0.0                  |                | 0.1         | 0.8                |      |
| Si/Al(Ca,Mg,Fe)                                                                  | 0.0                 | 2.1                    |                        |                 | 0.0           | 4.1           | 0.5        | 0.6         | 6.9         |             |            | 0.3        | 1.5           | 0.2            | 0.1            | 0.1             | 0.1              | 1.4             | 6.4                  |                | 0.3         | 7.3                |      |
| Si/Al(Ca,Mg,K,Fe)                                                                | 2.2                 | 3.4                    | 0.1                    | 0.0             |               | 9.6           | 6.0        | 1.1         |             |             |            |            | 4.9           | 2.2            |                | 1.3             | 0.0              | 3.2             | 9.0                  |                | 1.8         | 7.9                |      |
| Si/Al(K,Fe)                                                                      | 5.0                 |                        |                        |                 |               | 1.8           | 0.4        | 0.2         | 1.8         | 0.2         |            |            | 5.8           | 0.1            | 6.6            | 9.1             | 0.3              | 13.6            | 3.1                  | 6.1            | 2.0         | 0.2                | 0.4  |
| Si/Al(Mg,Fe)                                                                     | 1.9                 | 0.2                    | 0.1                    | 0.0             | 0.0           | 1.5           | 3.2        | 0.7         | 0.3         | 0.7         | 0.2        | 0.2        | 2.7           | 1.6            | 7.2            | 4.5             | 7.8              | 13.2            | 9.9                  | 10.0           | 0.4         | 1.5                | 10.6 |
| Si/Al(Mg,K)                                                                      | 1.2                 | 7.5                    | 0.4                    | 10.4            | 1.7           | 5.1           | 3.9        | 0.5         | 0.0         | 0.0         | 0.0        | 0.6        | 7.2           | 0.3            | 0.0            | 5.1             | 4.5              | 1.7             | 0.9                  | 0.0            | 0.2         | 1.7                |      |
| Si/Al(Mg,K,Fe)                                                                   | 53.4                | 4.3                    | 0.1                    | 3.1             |               | 16.8          | 44.8       | 0.6         |             | 4.9         |            | 4.2        | 13.8          | 29.2           | 21.2           | 24.9            | 33.7             | 42.6            | 24.7                 | 0.0            | 2.5         | 14.0               |      |
| Si/Al/Ca                                                                         | 5.3                 | 8.5                    | 0.3                    | 0.2             | 0.4           | 4.9           | 3.7        | 14.2        | 15.6        | 0.1         | 0.0        | 0.0        | 7.8           | 7.3            | 0.2            | 0.1             | 0.3              | 0.4             | 4.5                  |                | 3.8         | 3.0                |      |
| Si/Al/Fe                                                                         | 4.0                 | 0.0                    | 0.0                    |                 |               | 0.6           | 0.7        | 5.8         | 6.4         | 29.0        | 1.1        | 34.0       | 3.8           | 7.2            | 33.4           | 0.4             | 7.2              | 6.9             | 3.2                  | 65.5           | 0.3         | 2.8                |      |
| Si/Al/K                                                                          | 6.1                 | 1.3                    | 0.1                    | 15.1            | 5.9           | 3.6           | 4.7        | 1.1         | 2.7         | 2.2         | 2.3        | 6.7        | 12.6          | 2.6            | 2.8            | 4.8             | 16.2             | 10.3            | 4.8                  | 0.3            | 15.6        | 0.7                |      |
| Si/Al/Mg                                                                         | 2.0                 | 27.3                   | 27.9                   | 6.3             | 5.4           | 22.0          | 6.7        | 2.7         | 1.8         | 1.1         | 1.2        | 1.3        | 4.7           | 2.4            | 1.9            | 38.8            | 1.7              | 1.2             | 3.1                  | 0.2            | 0.6         | 18.6               |      |
| Si/Al/Na                                                                         | 2.8                 | 0.3                    | 0.0                    | 4.0             |               | 3.3           | 1.8        | 0.5         | 1.8         | 1.0         | 2.9        | 6.0        | 5.9           | 0.3            | 1.3            | 1.8             | 0.7              | 2.4             | 0.5                  | 0.1            | 13.9        | 0.2                |      |
| Si/Al                                                                            | 4.8                 | 3.4                    | 0.1                    | 0.3             | 0.0           | 2.7           | 3.4        | 15.4        | 21.9        | 38.8        | 64.5       | 18.9       | 0.7           | 7.4            | 6.5            | 1.3             | 2.9              | 4.3             | 4.7                  | 20.8           | 2.6         | 0.7                |      |
| Mixed Clays                                                                      | 3.2                 | 9.7                    | 0.7                    | 2.6             | 0.1           | 4.1           | 8.6        | 12.2        | 4.8         | 3.2         | 1.8        | 11.5       | 5.1           | 12.7           | 15.4           | 2.9             | 3.5              | 1.7             | 6.1                  | 2.9            | 15.0        | 8.7                |      |
| Si/Mg                                                                            | 0.1                 | 0.2                    | 12.7                   | 19.6            | 67.8          |               | 0.1        | 0.0         | 0.3         | 0.0         |            |            | 0.0           |                |                | 0.1             | 0.0              | 0.0             |                      | 0.0            | 0.1         | 0.7                |      |
| Si/Mg/Ca                                                                         |                     |                        | 8.9                    | 0.0             | 10.3          | 0.0           | 0.1        |             | 0.0         |             |            |            |               |                |                |                 |                  | 0.0             |                      | 1.1            |             | 0.0                |      |
| Ca/Mg/Si                                                                         | 0.0                 | 0.0                    | 4.2                    | 0.0             | 2.2           |               | 1.6        | 0.1         | 0.0         | 0.0         |            | 0.0        | 0.7           | 0.3            |                | 0.3             | 0.0              |                 |                      | 0.0            | 0.0         | 0.1                |      |
| Ca-rich                                                                          | 0.2                 | 3.5                    | 14.1                   | 7.3             | 1.9           | 2.5           | 0.4        | 11.9        | 8.5         |             |            | 0.0        | 5.3           | 2.0            | 0.0            | 0.1             | 0.0              | 1.3             | 3.3                  |                | 0.4         | 7.0                |      |
| Ca/Mg                                                                            |                     | 0.0                    | 1.7                    | 0.0             | 0.0           |               |            | 0.1         | 0.0         |             |            |            | 1.1           | 0.1            | 0.0            | 0.3             |                  | 0.1             | 0.2                  |                | 0.0         | 0.3                |      |
| Ca/Si/Al                                                                         | 3.5                 | 1.9                    | 0.0                    | 0.0             | 0.0           | 5.3           | 2.2        | 6.6         | 5.1         | 1.0         |            | 0.1        | 3.9           | 5.1            | 0.1            | 0.4             | 0.0              | 2.3             | 2.1                  |                | 0.0         | 1.7                |      |
| Ca/Si                                                                            | 1.4                 | 14.4                   | 16.5                   | 5.3             | 2.9           | 0.0           | 4.6        | 8.4         | 16.3        | 0.0         |            | 0.0        | 10.6          | 4.6            | 0.0            | 1.1             | 0.1              | 0.4             | 2.9                  | 0.0            | 1.2         | 10.4               |      |
| Ca/P                                                                             |                     |                        |                        |                 |               | 0.0           | 0.0        | 0.1         | 0.0         |             |            |            | 0.2           |                |                | 0.1             |                  | 0.1             | 0.1                  |                | 0.0         | 0.1                |      |
| Fe/Si                                                                            | 1.0                 | 0.1                    | 0.0                    | 0.0             | 0.0           | 1.4           | 0.0        |             | 0.0         | 0.5         |            | 2.8        | 2.3           | 0.0            | 1.2            | 1.9             | 0.6              | 2.1             | 2.8                  | 7.1            | 0.6         | 1.5                |      |
| Fe-rich                                                                          | 0.0                 |                        | 0.0                    |                 |               | 0.0           |            | 0.0         | 0.0         |             |            | 0.0        | 1.1           |                | 0.0            | 0.8             | 0.0              | 0.1             | 0.1                  | 0.4            | 0.9         | 0.1                |      |
| Na/S                                                                             | 0.2                 | 0.0                    | 0.4                    | 3.1             | 0.4           |               | 0.2        |             |             |             |            | 0.0        |               |                |                | 0.0             |                  | 0.0             |                      |                |             |                    |      |
| Na-rich                                                                          |                     |                        |                        | 19.0            |               |               |            |             |             |             |            |            |               |                |                | 0.0             |                  |                 |                      |                |             |                    |      |
| C-rich                                                                           |                     |                        | 0.0                    |                 |               |               |            | 0.0         | 0.0         | 0.0         | 0.0        | 0.0        | 3.0           |                |                | 0.0             |                  | 0.0             | 0.6                  | 0.0            |             | 0.0                |      |
| Misc.                                                                            | 0.2                 | 0.0                    | 0.1                    | 1.5             | 0.0           | 1.9           | 0.3        | 0.1         | 0.8         | 0.3         | 0.2        | 0.4        | 0.3           | 0.1            | 0.5            | 1.1             | 0.3              | 0.3             | 0.4                  | 0.2            | 0.9         | 0.3                |      |
| Total                                                                            | 100.0               | 100.0                  | 100.0                  | 100.0           | 100.0         | 100.0         | 100.0      | 100.0       | 100.0       | 100.0       | 100.0      | 100.0      | 100.0         | 100.0          | 100.0          | 100.0           | 100.0            | 100.0           | 100.0                | 100.0          | 100.0       | 100.0              |      |
| Country\Region                                                                   | Spain\Fuerteventura | Botswana\Matgadi\kgadi | Botswana\Matgadi\kgadi | Botswana\Baines | Botswana\Wkai | Chile\Atacama | USA\Nevada | Chad\Bodélé | Chad\Bodélé | Chad\Bodélé | USA\Nevada | USA\Nevada | China\Lanzhou | Australia\Eyre | Australia\Eyre | Australia\Frome | Serbia\Batajnica | Serbia\Kostolac | Serbia\Stan Sankamen | USA\California | USA\Arizona | Djibouti\Lemonnier |      |

Supplement S5.1 – SEM-based Individual Particle Analysis – Summary Tables – 29 Chemical Categories

| 29 Chemical categories                                                           |                    |                    |                    |            |              |            |              |              |             |           |              |                 |                 |                   |               |                         |                   |             |             |             |              |          |          |
|----------------------------------------------------------------------------------|--------------------|--------------------|--------------------|------------|--------------|------------|--------------|--------------|-------------|-----------|--------------|-----------------|-----------------|-------------------|---------------|-------------------------|-------------------|-------------|-------------|-------------|--------------|----------|----------|
| Average weight percentage of approximately 1,000 individual particles per sample |                    |                    |                    |            |              |            |              |              |             |           |              |                 |                 |                   |               |                         |                   |             |             |             |              |          |          |
|                                                                                  | S2001              | S2002              | S2003              | S2004      | S2005        | S2006      | S2007        | S2008        | S2009       | S2010     | S2011        | S2012           | S2013           | S2014             | S2015         | S2016                   | S2017             | S3003       | S3004       | S3008       | S3011        | S3016    | S3017    |
| Si-rich                                                                          | 1.3                | 4.0                | 12.0               | 1.2        | 0.5          | 3.5        | 1.2          | 2.5          | 4.8         | 5.2       | 1.2          | 1.3             | 1.5             | 2.2               | 5.5           | 2.2                     | 1.7               | 3.2         | 1.0         | 3.6         | 4.2          | 1.3      | 4.1      |
| Si/Al(Ca,Mg)                                                                     | 0.6                | 0.8                | 0.1                | 1.4        | 1.1          | 1.4        | 1.2          | 0.8          |             | 0.3       | 2.1          | 2.1             | 1.8             | 2.2               | 4.2           | 0.4                     | 0.9               | 0.8         | 0.0         | 0.4         | 0.9          | 3.0      | 2.3      |
| Si/Al(Ca,Mg,Fe)                                                                  | 2.7                | 3.4                | 0.4                | 3.6        | 2.9          | 3.2        | 12.2         | 1.5          | 2.0         | 7.7       | 1.0          | 2.7             | 15.1            | 9.2               | 11.7          | 1.6                     | 4.1               | 0.3         | 1.1         | 1.2         | 0.6          | 1.2      | 1.1      |
| Si/Al(Ca,Mg,K,Fe)                                                                | 5.4                | 14.3               | 0.5                | 7.3        | 0.2          | 11.9       | 11.4         | 3.8          | 1.3         | 5.9       | 1.5          | 5.1             | 6.7             | 9.9               | 11.5          | 5.0                     | 1.4               | 4.5         | 1.7         | 3.3         | 5.0          | 2.2      | 5.8      |
| Si/Al(K,Fe)                                                                      | 0.1                | 3.3                | 1.6                | 0.1        |              | 0.0        |              | 0.0          | 0.3         |           |              | 0.7             | 0.1             | 0.0               |               |                         | 1.2               | 0.3         | 2.1         | 0.5         | 5.5          | 0.0      | 0.0      |
| Si/Al(Mg,Fe)                                                                     | 5.6                | 3.3                | 14.3               | 1.9        | 0.3          | 1.9        | 5.5          | 1.9          | 9.3         | 2.3       | 0.0          | 4.7             | 3.3             | 2.1               | 0.4           | 18.1                    | 12.5              | 3.4         | 2.6         | 4.7         | 6.1          | 0.9      | 0.3      |
| Si/Al(Mg,K)                                                                      | 0.8                | 1.3                | 0.6                | 2.8        | 0.6          | 3.9        | 0.2          | 1.9          | 2.5         | 0.8       | 1.9          | 3.4             | 1.1             | 0.7               | 1.1           | 10.5                    | 2.4               | 14.9        | 8.5         | 5.6         | 1.5          | 2.6      | 2.8      |
| Si/Al(Mg,K,Fe)                                                                   | 14.0               | 6.7                | 23.5               | 9.8        | 0.9          | 13.3       | 6.7          | 2.1          | 13.8        | 4.0       | 1.1          | 6.1             | 9.9             | 5.2               | 1.6           | 17.2                    | 12.9              | 16.4        | 40.6        | 29.8        | 27.9         | 1.6      | 1.0      |
| Si/Al/Ca                                                                         | 9.7                | 7.5                | 0.8                | 1.7        | 0.3          | 4.9        | 5.5          | 3.7          | 1.4         | 2.6       | 1.3          | 5.1             | 6.0             | 6.4               | 8.0           | 1.0                     | 3.2               | 1.3         | 2.4         | 1.1         | 1.2          | 14.9     | 6.3      |
| Si/Al/Fe                                                                         | 1.4                | 1.0                | 1.6                | 0.7        |              | 0.4        | 0.2          | 0.2          | 1.9         | 0.1       |              | 0.5             | 1.2             | 0.7               | 0.1           | 1.7                     | 1.6               | 0.8         | 0.5         | 0.8         | 3.4          | 0.0      | 0.0      |
| Si/Al/K                                                                          | 3.9                | 12.9               | 18.3               | 3.6        | 3.3          | 5.3        | 3.1          | 8.1          | 5.5         | 3.9       | 1.7          | 2.3             | 4.6             | 2.3               | 5.2           | 2.9                     | 3.8               | 7.6         | 4.9         | 9.0         | 18.7         | 2.9      | 3.5      |
| Si/Al/Mg                                                                         | 15.5               | 3.8                | 7.8                | 35.2       | 5.8          | 18.0       | 15.0         | 17.3         | 36.5        | 11.1      | 4.2          | 37.4            | 19.6            | 14.9              | 9.2           | 22.3                    | 24.3              | 19.8        | 13.6        | 18.5        | 3.3          | 5.0      | 11.5     |
| Si/Al/Na                                                                         | 1.2                | 1.1                | 3.5                | 1.0        | 0.1          | 1.1        | 0.2          | 1.4          | 0.8         | 2.2       | 0.5          | 2.6             | 1.2             | 1.4               | 2.4           | 1.9                     | 1.4               | 3.9         | 1.7         | 0.8         | 2.6          | 0.3      | 0.5      |
| Si/Al                                                                            | 0.2                | 4.8                | 4.7                | 1.1        | 0.0          | 2.0        | 0.6          | 0.6          | 2.7         | 1.4       |              | 0.3             | 0.8             | 0.7               | 0.8           | 1.2                     | 1.6               | 2.8         | 5.7         | 6.5         | 7.3          | 0.4      | 0.5      |
| Mixed Clays                                                                      | 8.8                |                    | 2.9                | 2.7        | 2.1          | 0.2        | 4.0          | 2.6          | 1.6         | 3.2       | 1.6          | 0.1             | 2.7             | 4.0               | 3.0           | 2.8                     | 12.0              | 7.1         | 10.8        | 7.7         | 6.6          | 1.5      | 5.2      |
| Si/Mg                                                                            | 0.6                | 0.0                | 3.2                | 3.1        | 3.8          | 0.1        | 1.3          | 0.3          | 0.8         | 1.8       | 0.0          | 0.9             | 0.5             | 2.6               | 3.9           | 0.2                     | 1.9               | 0.0         |             |             |              | 0.0      | 0.1      |
| Si/Mg/Ca                                                                         | 0.1                | 0.3                | 0.0                | 0.3        | 1.3          | 0.1        | 0.5          | 0.4          | 0.1         | 0.3       | 1.8          | 0.4             | 0.4             | 2.1               | 1.4           | 0.0                     | 0.2               |             | 0.0         |             |              | 0.0      | 0.0      |
| Ca/Mg/Si                                                                         | 0.9                | 0.2                | 0.3                | 5.1        | 11.8         | 2.5        | 2.6          | 1.5          | 0.0         | 1.5       | 15.4         | 0.2             | 0.5             | 5.0               | 3.5           | 0.0                     | 1.7               | 0.0         |             |             | 0.4          | 11.5     | 6.6      |
| Ca-rich                                                                          | 7.8                | 2.9                | 0.6                | 1.4        | 23.0         | 3.7        | 3.3          | 27.7         | 4.1         | 26.2      | 8.3          | 2.7             | 5.8             | 7.0               | 5.6           | 3.2                     | 3.0               | 5.8         | 0.2         | 0.4         | 0.8          | 17.7     | 15.9     |
| Ca/Mg                                                                            | 0.2                | 0.0                | 0.0                | 0.4        | 32.9         | 0.4        | 0.4          | 0.1          | 0.4         | 1.4       | 54.1         |                 |                 | 2.4               | 1.2           | 0.0                     | 1.6               |             |             |             | 1.8          | 6.0      | 0.5      |
| Ca/Si/Al                                                                         | 3.4                | 9.4                | 0.7                | 1.4        |              | 1.4        | 6.3          | 2.4          | 0.9         | 1.7       | 0.1          | 1.7             | 2.6             | 1.1               | 1.8           | 1.4                     | 0.8               | 3.0         | 0.9         | 2.7         | 0.6          | 4.6      | 2.1      |
| Ca/Si                                                                            | 13.8               | 14.4               | 0.4                | 14.5       | 8.8          | 15.2       | 19.7         | 18.2         | 7.2         | 14.1      | 2.6          | 14.2            | 12.3            | 17.8              | 17.7          | 5.0                     | 3.7               | 2.9         | 1.1         | 2.3         | 0.1          | 21.3     | 29.2     |
| Ca/P                                                                             | 0.3                |                    | 0.0                | 0.1        | 0.0          | 0.1        | 0.0          | 0.4          | 0.2         | 0.0       | 0.0          | 0.1             | 0.1             | 0.0               | 0.0           | 0.0                     | 0.1               | 0.1         | 0.3         | 0.1         | 0.2          | 0.8      | 0.1      |
| Fe/Si                                                                            | 0.9                | 1.0                | 1.7                | 0.2        | 0.8          | 0.8        | 0.1          | 0.1          | 0.3         | 0.6       | 0.6          | 0.4             | 0.4             | 0.1               | 0.3           | 1.1                     | 0.5               | 0.8         | 0.3         | 0.3         | 0.8          | 0.1      | 0.1      |
| Fe-rich                                                                          | 0.4                |                    | 0.0                | 0.1        |              |            |              | 0.1          | 0.0         | 0.1       | 0.0          |                 |                 | 0.5               |               | 0.2                     | 0.0               | 0.0         | 0.0         | 0.0         | 0.0          | 0.1      | 0.0      |
| Na/S                                                                             | 0.0                |                    |                    |            |              |            |              |              |             |           |              |                 |                 |                   |               | 0.0                     | 0.0               |             |             |             |              |          |          |
| Na-rich                                                                          |                    |                    |                    |            |              |            |              |              |             |           |              |                 |                 |                   |               |                         |                   |             |             |             |              |          |          |
| C-rich                                                                           | 0.0                | 0.0                | 0.5                |            | 0.1          | 0.0        |              | 0.0          | 0.1         | 0.1       | 0.0          | 0.2             |                 | 0.0               |               | 0.0                     | 0.0               |             |             |             | 0.0          | 0.0      |          |
| Misc.                                                                            | 0.2                | 0.5                | 0.4                | 0.1        | 1.0          | 0.8        | 0.1          | 1.5          | 0.1         | 3.1       | 0.4          | 2.2             | 0.4             | 0.4               | 0.6           | 0.4                     | 1.7               | 0.3         | 0.0         | 0.8         | 0.6          | 0.0      | 0.3      |
| Total                                                                            | 100.0              | 97.1               | 100.2              | 100.6      | 101.8        | 96.2       | 101.4        | 101.0        | 98.4        | 101.6     | 101.5        | 97.4            | 98.7            | 101.0             | 100.5         | 100.0                   | 100.0             | 100.0       | 100.0       | 100.0       | 100.0        | 100.0    | 100.0    |
| Country\Region                                                                   | Djibouti\Lemonnier | Afghanistan\Bagram | Afghanistan\Khowst | Qatar\Doha | UAE\Al Udeid | Iraq\Balad | Iraq\Baghdad | Iraq\Trailil | Iraq\Tikrit | Iraq\Taji | Iraq\Al Asad | Kuwait\Buehring | Kuwait\Al Salem | Kuwait\Shu Ayabah | Kuwait\Arifan | Afghanistan\Leatherneck | Kuwait\Shu Ayabah | USA\Arizona | USA\Arizona | USA\Arizona | USA\Colorado | USA\Utah | USA\Utah |

Supplement S5.2 – SEM-based Individual Particle Analysis – Summary Tables – 15 Chemical Categories (Mineral names inferred)

| 15 Chemical categories                                                           |                     |                     |                     |                      |                     |                    |                     |                    |                      |                      |                     |                     |                    |                     |                     |                     |                    |                    |                        |                        |                       |                       |
|----------------------------------------------------------------------------------|---------------------|---------------------|---------------------|----------------------|---------------------|--------------------|---------------------|--------------------|----------------------|----------------------|---------------------|---------------------|--------------------|---------------------|---------------------|---------------------|--------------------|--------------------|------------------------|------------------------|-----------------------|-----------------------|
| Average weight percentage of approximately 1,000 individual particles per sample |                     |                     |                     |                      |                     |                    |                     |                    |                      |                      |                     |                     |                    |                     |                     |                     |                    |                    |                        |                        |                       |                       |
|                                                                                  | S1005               | S1006               | S1007               | S1008                | S1009               | S1010              | S1011               | S1013              | S1014                | S1016                | S1017               | S1018               | S1019              | S1022               | S1023               | S1024               | S1025              | S1027              | S1033                  | S1034                  | S1035                 | S1038                 |
| Si-rich (quartz)                                                                 | 2                   | 0                   | 1                   | 6                    | 0                   | 2                  | 0                   | 1                  | 7                    | 8                    | 3                   | 10                  | 2                  | 0                   | 0                   |                     | 5                  | 3                  | 4                      | 5                      | 2                     | 2                     |
| K-Al-Si (K feldspar/mica)                                                        | 2                   | 0                   | 1                   | 8                    | 0                   | 1                  | 1                   | 2                  | 14                   | 12                   | 8                   | 19                  | 7                  | 1                   | 3                   | 2                   | 10                 | 7                  | 5                      | 6                      | 13                    | 4                     |
| Na-Al-Si (Na feldspar)                                                           | 1                   | 0                   | 0                   | 2                    | 0                   | 0                  | 0                   | 1                  | 12                   | 9                    | 7                   | 20                  | 6                  | 0                   | 3                   | 2                   | 2                  | 2                  | 2                      | 3                      | 2                     | 1                     |
| Ca-Al-Si (Ca feldspar)                                                           | 5                   | 2                   | 3                   | 3                    | 0                   | 1                  | 0                   | 7                  | 3                    | 2                    | 3                   | 1                   | 3                  | 0                   |                     | 0                   | 2                  | 1                  | 4                      | 1                      | 1                     | 5                     |
| Si-Al-Mg (clay)                                                                  | 15                  | 7                   | 14                  | 70                   | 64                  | 56                 | 58                  | 31                 | 52                   | 57                   | 58                  | 41                  | 59                 | 9                   | 14                  | 13                  | 58                 | 86                 | 71                     | 72                     | 67                    | 64                    |
| Ca-Si                                                                            | 27                  | 19                  | 8                   | 2                    | 1                   | 1                  | 1                   | 6                  | 6                    | 6                    | 2                   | 1                   | 1                  | 4                   | 1                   | 1                   | 6                  | 0                  | 5                      | 1                      | 3                     | 11                    |
| Si-Mg                                                                            |                     | 0                   | 0                   |                      |                     | 0                  | 0                   | 0                  | 0                    | 0                    | 14                  | 0                   | 16                 | 67                  | 3                   | 7                   | 0                  |                    | 0                      | 0                      | 0                     | 0                     |
| Ca-rich (calcite)                                                                | 36                  | 51                  | 10                  | 1                    | 0                   | 0                  | 0                   | 45                 | 3                    | 2                    | 4                   | 1                   | 4                  | 4                   | 2                   | 3                   | 5                  |                    | 2                      | 1                      | 1                     | 9                     |
| Ca-Mg (dolomite)                                                                 | 10                  | 18                  | 55                  |                      |                     | 0                  | 0                   | 0                  | 0                    | 0                    | 0                   | 0                   | 0                  | 0                   | 11                  | 4                   | 13                 | 1                  |                        | 1                      | 0                     | 1                     |
| Ca-S (sulfates)                                                                  | 0                   |                     |                     |                      |                     |                    |                     | 0                  | 0                    | 0                    | 0                   |                     | 0                  |                     |                     |                     |                    |                    |                        |                        |                       | 0                     |
| Fe-rich (oxides)                                                                 | 1                   | 1                   | 4                   | 6                    | 30                  | 35                 | 33                  | 2                  | 2                    | 2                    | 0                   | 3                   | 1                  | 0                   | 0                   | 0                   | 8                  | 1                  | 3                      | 4                      | 6                     | 0                     |
| Salts                                                                            | 1                   | 1                   | 1                   |                      | 0                   | 0                  | 0                   | 1                  | 0                    | 0                    | 1                   | 1                   | 3                  | 2                   | 68                  | 58                  | 0                  | 0                  | 1                      | 1                      | 0                     | 1                     |
| Pb-bearing                                                                       |                     |                     |                     |                      |                     |                    |                     |                    |                      |                      |                     |                     |                    |                     |                     |                     |                    |                    |                        |                        |                       |                       |
| C-rich                                                                           |                     |                     | 0                   |                      |                     |                    |                     |                    | 1                    | 0                    | 0                   | 0                   |                    |                     | 0                   | 0                   | 0                  |                    | 1                      | 0                      |                       |                       |
| Misc.                                                                            | 1                   | 1                   | 2                   | 2                    | 2                   | 3                  | 6                   | 5                  | 1                    | 1                    | 1                   | 3                   |                    | 1                   | 2                   | 1                   | 3                  | 1                  | 1                      | 3                      | 4                     | 0                     |
| Totals                                                                           | 100                 | 100                 | 100                 | 100                  | 100                 | 100                | 100                 | 100                | 100                  | 100                  | 100                 | 100                 | 100                | 100                 | 100                 | 100                 | 100                | 100                | 100                    | 100                    | 100                   | 100                   |
| Site PM                                                                          | S1005 LaMaia1 PM2.5 | S1006 LaMaia2 PM2.5 | S1007 Mirador PM2.5 | S1008 DeFernes PM2.5 | S1009 aBamako PM2.5 | S1010 Bamako PM2.5 | S1011 wBamako PM2.5 | S1013 cVerde PM2.5 | S1014 Karamay1 PM2.5 | S1016 Karamay2 PM2.5 | S1017 Daemon1 PM2.5 | S1018 Daemon2 PM2.5 | S1019 OwensL PM2.5 | S1022 EtoshaF PM2.5 | S1023 EtoshaS PM2.5 | S1024 EtoshaL PM2.5 | S1025 Liriki PM2.5 | S1027 Galdar PM2.5 | S1033 PozoNegro1 PM2.5 | S1034 PozoNegro2 PM2.5 | S1035 Ampuyenta PM2.5 | S1038 Mopipi PM2.5    |
| Country\Region                                                                   | Spain\Lanzarote     | Spain\Lanzarote     | Spain\Lanzarote     | Spain\Lanzarote      | Mali\Bamako         | Mali\Bamako        | Mali\Bamako         | Cape Verde\Sal     | China\Karamay        | China\Karamay        | China\Xinjiang      | China\Xinjiang      | USA\California     | Namibia\Etosha      | Namibia\Etosha      | Namibia\Etosha      | Morocco\Liriki     | Spain\Gran Canaria | Spain\Fuerteventura    | Spain\Fuerteventura    | Spain\Fuerteventura   | Botswana\Makgadikgadi |



Supplement S5.2 – SEM-based Individual Particle Analysis – Summary Tables – 15 Chemical Categories (Mineral names inferred)

| 15 Chemical categories                                                           |                       |                    |                  |                       |                        |                      |                       |                       |                      |                      |                     |                     |                        |                    |                       |                      |                        |                        |                     |                      |                     |                    |     |
|----------------------------------------------------------------------------------|-----------------------|--------------------|------------------|-----------------------|------------------------|----------------------|-----------------------|-----------------------|----------------------|----------------------|---------------------|---------------------|------------------------|--------------------|-----------------------|----------------------|------------------------|------------------------|---------------------|----------------------|---------------------|--------------------|-----|
| Average weight percentage of approximately 1,000 individual particles per sample |                       |                    |                  |                       |                        |                      |                       |                       |                      |                      |                     |                     |                        |                    |                       |                      |                        |                        |                     |                      |                     |                    |     |
|                                                                                  | S1039                 | S1040              | S1041            | S1042                 | S1045                  | S1049                | S1050                 | S1051                 | S1052                | S1053                | S1055               | S1056               | S1057                  | S1058              | S1060                 | S1062                | S1064                  | S1065                  | S1066               | S2001                | S2001               | S2002              |     |
| Si-rich (quartz)                                                                 | 2                     | 8                  | 3                | 1                     | 5                      | 19                   | 16                    | 28                    | 21                   | 4                    | 6                   | 4                   | 2                      | 8                  | 3                     | 11                   | 7                      | 0                      | 32                  | 2                    | 1.3                 | 4.0                |     |
| K-Al-Si (K feldspar/mica)                                                        | 1                     | 38                 | 15               | 3                     | 7                      | 2                    | 1                     | 2                     | 2                    | 6                    | 7                   | 5                   | 4                      | 5                  | 10                    | 8                    | 6                      | 1                      | 18                  | 2                    | 3.9                 | 12.9               |     |
| Na-Al-Si (Na feldspar)                                                           | 0                     | 1                  |                  | 3                     | 3                      | 1                    | 1                     | 1                     | 4                    | 5                    | 6                   | 2                   | 3                      | 2                  | 1                     | 2                    | 1                      | 0                      | 12                  | 1                    | 1.2                 | 1.1                |     |
| Ca-Al-Si (Ca feldspar)                                                           | 1                     | 0                  | 0                | 4                     | 3                      | 6                    | 6                     | 0                     | 1                    | 1                    | 6                   | 3                   | 1                      | 0                  | 1                     | 1                    | 2                      |                        | 6                   | 2                    | 9.9                 | 8.9                |     |
| Si-Al-Mg (clay)                                                                  | 34                    | 22                 | 22               | 77                    | 74                     | 48                   | 53                    | 61                    | 72                   | 73                   | 30                  | 71                  | 86                     | 73                 | 77                    | 65                   | 47                     | 75                     | 20                  | 64                   | 54.9                | 44.4               |     |
| Ca-Si                                                                            | 13                    | 2                  | 3                | 6                     | 5                      | 11                   | 9                     | 0                     | 0                    | 1                    | 17                  | 7                   | 0                      | 1                  | 1                     | 3                    | 10                     | 0                      | 2                   | 10                   | 17.3                | 23.8               |     |
| Si-Mg                                                                            | 24                    | 9                  | 49               | 0                     | 0                      | 0                    | 1                     | 1                     | 0                    |                      | 0                   | 0                   | 0                      | 0                  | 0                     | 0                    | 0                      |                        | 1                   | 0                    | 0.7                 | 0.3                |     |
| Ca-rich (calcite)                                                                | 21                    | 3                  | 4                | 0                     | 2                      | 9                    | 7                     |                       |                      | 0                    | 19                  | 4                   | 0                      | 1                  | 0                     | 2                    | 16                     |                        | 2                   | 12                   | 8.1                 | 2.9                |     |
| Ca-Mg (dolomite)                                                                 | 4                     | 0                  | 2                |                       |                        | 1                    | 1                     | 0                     |                      | 0                    | 4                   | 2                   | 0                      | 1                  | 0                     | 1                    | 0                      |                        | 0                   | 0                    | 1.1                 | 0.2                |     |
| Ca-S (sulfates)                                                                  |                       |                    |                  | 3                     |                        |                      |                       |                       |                      |                      | 0                   | 0                   | 0                      | 0                  |                       |                      |                        |                        |                     |                      |                     | 0.0                | 0.0 |
| Fe-rich (oxides)                                                                 | 0                     | 0                  | 0                | 2                     | 0                      | 0                    | 0                     | 0                     | 0                    | 8                    | 3                   | 0                   | 1                      | 5                  | 5                     | 5                    | 8                      | 20                     | 4                   | 5                    | 1.3                 | 1.0                |     |
| Salts                                                                            | 0                     | 14                 | 1                |                       | 0                      | 0                    | 1                     | 1                     | 0                    | 0                    | 0                   | 1                   | 0                      | 1                  | 0                     | 0                    | 0                      | 0                      |                     | 0                    | 0.0                 | 0.0                |     |
| Pb-bearing                                                                       |                       |                    |                  |                       |                        |                      |                       |                       |                      |                      |                     |                     |                        |                    |                       |                      |                        |                        |                     |                      |                     | 0.0                | 0.0 |
| C-rich                                                                           |                       |                    |                  |                       |                        | 0                    | 2                     | 4                     |                      | 0                    |                     |                     |                        |                    |                       | 0                    | 0                      | 0                      |                     | 0                    | 0.0                 | 0.0                |     |
| Misc.                                                                            | 0                     | 2                  | 0                | 1                     | 1                      | 2                    | 2                     | 1                     |                      | 2                    | 2                   | 1                   | 2                      | 2                  | 2                     | 3                    | 1                      | 2                      | 2                   | 1                    | 0.2                 | 0.5                |     |
| Totals                                                                           | 100                   | 100                | 100              | 100                   | 100                    | 100                  | 100                   | 100                   | 100                  | 100                  | 100                 | 100                 | 100                    | 100                | 100                   | 100                  | 100                    | 100                    | 100                 | 100                  | 100                 | 100                |     |
| Site PM                                                                          | S1039 Rakops PM2.5    | S1040 Baines PM2.5 | S1041 Nxai PM2.5 | S1042 AtacamaRG PM2.5 | S1045 Black Rock PM2.5 | S1049 Bodélé44 PM2.5 | S1050 Bodélé44b PM2.5 | S1051 Bodélé44c PM2.5 | S1052 PeavineW PM2.5 | S1053 PeavineY PM2.5 | S1055 Lanzhou PM2.5 | S1056 CooperC PM2.5 | S1057 WarburtonR PM2.5 | S1058 LFrome PM2.5 | S1060 Batajnica PM2.5 | S1062 Kostolac PM2.5 | S1064 Slankamen PM2.5  | S1065 Carbondale PM2.5 | S1066 Arizona PM2.5 | S2001 Djibouti PM2.5 | S2001 Djibouti PM10 | S2002 Bagram PM10  |     |
| Country\Region                                                                   | Botswana\Makgadikgadi | Botswana\Baines    | Botswana\Nxai    | Chile\Atacama         | USA\Nevada             | Chad\Bodélé          | Chad\Bodélé           | Chad\Bodélé           | USA\Nevada           | USA\Nevada           | China\Lanzhou       | Australia\Eyre      | Australia\Eyre         | Australia\Frome    | Serbia\Batajnica      | Serbia\Kostolac      | Serbia\Stari Slankamen | USA\California         | USA\Arizona         | Djibouti\Lemmonier   | Djibouti\Lemmonier  | Afghanistan\Bagram |     |

Supplement S5.2 – SEM-based Individual Particle Analysis – Summary Tables – 15 Chemical Categories (Mineral names inferred)

| 15 Chemical categories                                                           |                    |                  |                |                  |                    |                   |                   |                 |                   |                    |                     |                     |                    |                         |                        |                      |                       |                       |                     |                        |                        |
|----------------------------------------------------------------------------------|--------------------|------------------|----------------|------------------|--------------------|-------------------|-------------------|-----------------|-------------------|--------------------|---------------------|---------------------|--------------------|-------------------------|------------------------|----------------------|-----------------------|-----------------------|---------------------|------------------------|------------------------|
| Average weight percentage of approximately 1,000 individual particles per sample |                    |                  |                |                  |                    |                   |                   |                 |                   |                    |                     |                     |                    |                         |                        |                      |                       |                       |                     |                        |                        |
|                                                                                  | S2003              | S2004            | S2005          | S2006            | S2007              | S2008             | S2009             | S2010           | S2011             | S2012              | S2013               | S2014               | S2015              | S2016                   | S2017                  | S3003                | S3004                 | S3008                 | S3011               | S3016                  | S3017                  |
| Si-rich (quartz)                                                                 | 12.0               | 1.2              | 0.5            | 3.5              | 1.2                | 2.5               | 4.8               | 5.2             | 1.2               | 1.3                | 1.5                 | 2.2                 | 5.5                | 6                       | 5                      | 10                   | 7                     | 9                     | 14                  | 4                      | 6                      |
| K-Al-Si (K feldspar/mica)                                                        | 18.3               | 3.6              | 3.3            | 5.3              | 3.1                | 8.1               | 5.5               | 3.9             | 1.7               | 2.3                | 4.6                 | 2.3                 | 5.2                | 4                       | 5                      | 10                   | 8                     | 9                     | 15                  | 3                      | 3                      |
| Na-Al-Si (Na feldspar)                                                           | 3.5                | 1.0              | 0.1            | 1.1              | 0.2                | 1.4               | 0.8               | 2.2             | 0.5               | 2.6                | 1.2                 | 1.4                 | 2.4                | 4                       | 2                      | 4                    | 2                     | 1                     | 6                   | 1                      | 1                      |
| Ca-Al-Si (Ca feldspar)                                                           | 1.5                | 2.2              | 0.6            | 5.9              | 5.8                | 4.1               | 1.6               | 2.8             | 2.6               | 5.2                | 6.6                 | 7.5                 | 9.4                | 2                       | 2                      | 2                    | 2                     | 2                     | 2                   | 4                      | 4                      |
| Si-Al-Mg (clay)                                                                  | 56.8               | 65.4             | 11.8           | 59.0             | 55.3               | 31.3              | 73.2              | 34.0            | 10.6              | 65.6               | 62.9                | 47.6                | 41.5               | 64                      | 62                     | 60                   | 76                    | 69                    | 52                  | 16                     | 20                     |
| Ca-Si                                                                            | 1.1                | 15.9             | 9.2            | 17.3             | 26.8               | 24.1              | 8.0               | 18.0            | 3.6               | 16.4               | 15.1                | 19.0                | 20.4               | 8                       | 7                      | 5                    | 1                     | 3                     | 1                   | 33                     | 35                     |
| Si-Mg                                                                            | 3.3                | 3.4              | 5.2            | 0.2              | 1.8                | 0.6               | 0.9               | 2.2             | 1.8               | 1.3                | 0.9                 | 4.7                 | 5.3                | 1                       | 3                      | 0                    | 0                     |                       |                     | 0                      | 1                      |
| Ca-rich (calcite)                                                                | 0.6                | 1.6              | 21.5           | 3.0              | 2.6                | 20.7              | 4.3               | 11.4            | 4.3               | 2.5                | 5.8                 | 6.8                 | 5.0                | 5                       | 5                      | 5                    | 1                     | 1                     | 3                   | 26                     | 22                     |
| Ca-Mg (dolomite)                                                                 | 0.3                | 5.4              | 44.8           | 2.9              | 3.0                | 1.6               | 0.4               | 3.0             | 67.7              | 0.2                | 0.5                 | 7.4                 | 4.6                | 0                       | 3                      | 0                    |                       |                       | 2                   | 10                     | 6                      |
| Ca-S (sulfates)                                                                  | 0.0                | 0.0              | 2.0            | 0.6              | 0.0                | 4.5               | 0.0               | 14.6            | 3.4               | 0.0                | 0.0                 | 0.4                 | 0.0                | 0                       | 0                      | 1                    |                       |                       | 0                   | 0                      |                        |
| Fe-rich (oxides)                                                                 | 1.7                | 0.3              | 0.8            | 0.8              | 0.1                | 0.2               | 0.3               | 0.2             | 0.6               | 0.4                | 0.4                 | 0.6                 | 0.3                | 4                       | 3                      | 2                    | 2                     | 3                     | 3                   | 1                      | 0                      |
| Salts                                                                            | 0.0                | 0.0              | 0.1            | 0.1              | 0.0                | 0.0               | 0.0               | 1.7             | 2.1               | 0.0                | 0.0                 | 0.0                 | 0.0                | 0                       | 1                      | 1                    | 0                     | 1                     | 0                   | 1                      | 0                      |
| Pb-bearing                                                                       | 0.0                | 0.0              | 0.0            | 0.0              | 0.0                | 0.0               | 0.0               | 0.0             | 0.0               | 0.0                | 0.0                 | 0.0                 | 0.0                |                         |                        |                      |                       |                       |                     |                        |                        |
| C-rich                                                                           | 0.5                | 0.0              | 0.1            | 0.0              | 0.0                | 0.0               | 0.1               | 0.1             | 0.0               | 0.2                | 0.0                 | 0.0                 | 0.0                |                         | 0                      |                      |                       |                       |                     | 0                      |                        |
| Misc.                                                                            | 0.4                | 0.1              | 0.2            | 0.2              | 0.1                | 0.7               | 0.1               | 0.7             | 0.1               | 1.8                | 0.4                 | 0.2                 | 0.2                | 2                       | 2                      | 1                    | 1                     | 1                     | 2                   | 0                      | 0                      |
| Totals                                                                           | 100                | 100              | 100            | 100              | 100                | 100               | 100               | 100             | 100               | 100                | 100                 | 100                 | 100                | 100                     | 100                    | 100                  | 100                   | 100                   | 100                 | 100                    | 100                    |
| Site PM                                                                          | S2003 Khowst PM10  | S2004 Qatar PM10 | S2005 UAE PM10 | S2006 Balad PM10 | S2007 Baghdad PM10 | S2008 Tallil PM10 | S2009 Tikrit PM10 | S2010 Taji PM10 | S2011 AlAsad PM10 | S2012 KuwaitN PM10 | S2013 KuwaitCe PM10 | S2014 KuwaitCo PM10 | S2015 KuwaitS PM10 | S2016 Helmand PM2.5     | S2017 KuwaitPort PM2.5 | S3003 Yuma3835 PM2.5 | S3004 Yuma26500 PM2.5 | S3008 YumaRoadr PM2.5 | S3011 FCarson PM2.5 | S3016 DugwayLima PM2.5 | S3017 DugwayXray PM2.5 |
| Country \ Region                                                                 | Afghanistan\Khowst | Qatar\Doha       | UAE\Al Udeid   | Iraq\Balad       | Iraq\Baghdad       | Iraq\Tallil       | Iraq\Tikrit       | Iraq\Taji       | Iraq\Al Asad      | Kuwait\Buehring    | Kuwait\Al Salem     | Kuwait\Shu Ayabah   | Kuwait\Arifjan     | Afghanistan\Leatherneck | Kuwait\Shu Ayabah      | USA\Arizona          | USA\Arizona           | USA\Arizona           | USA\Colorado        | USA\Utah               | USA\Utah               |

Supplement S5.3 – SEM-based Individual Particle Analysis, 15 Chemical Categories – Summary Mineral Plots

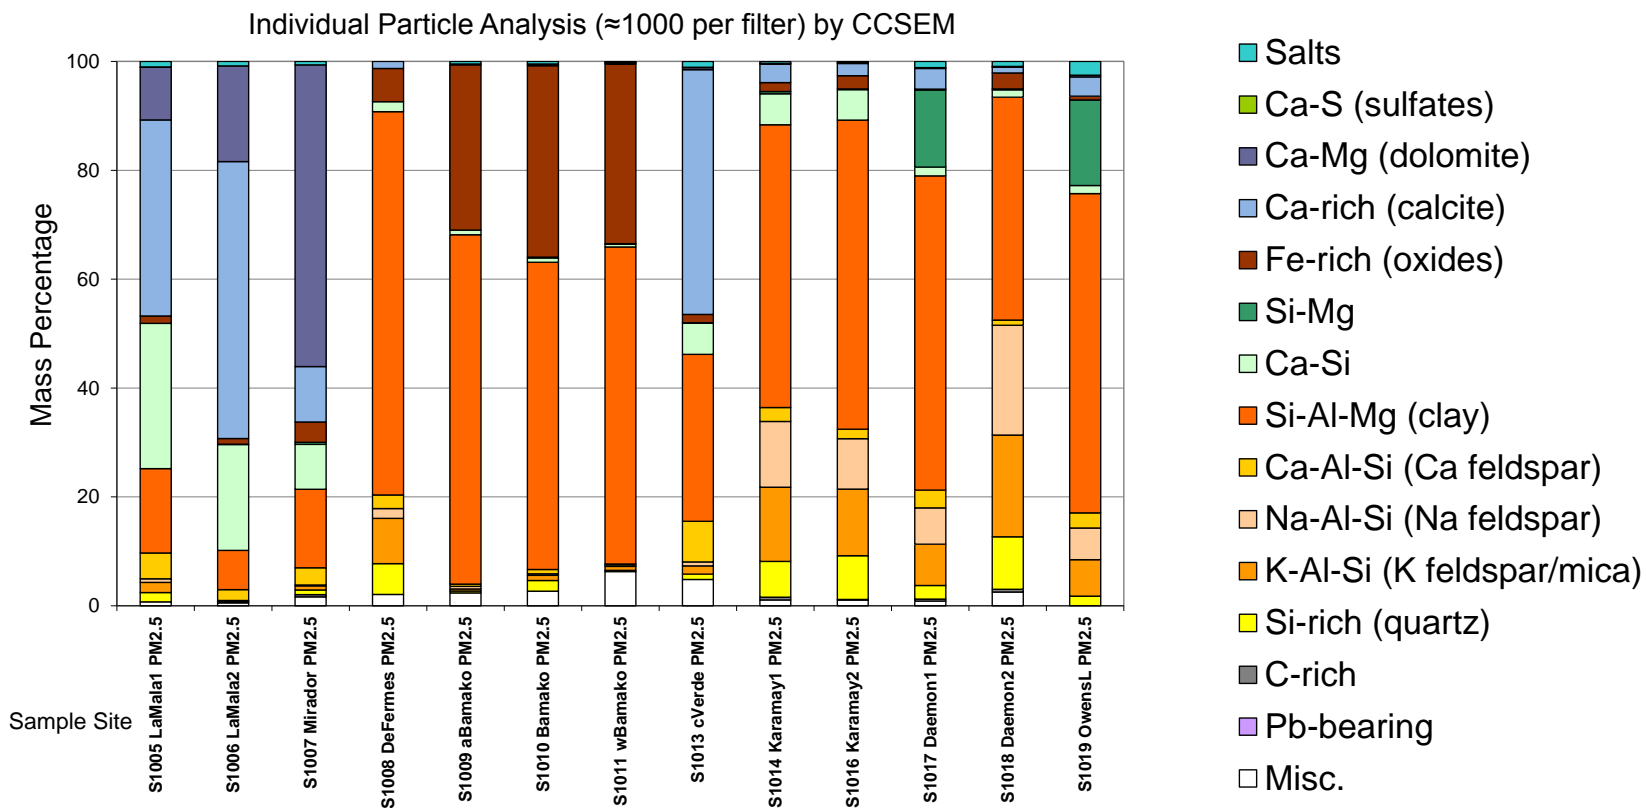

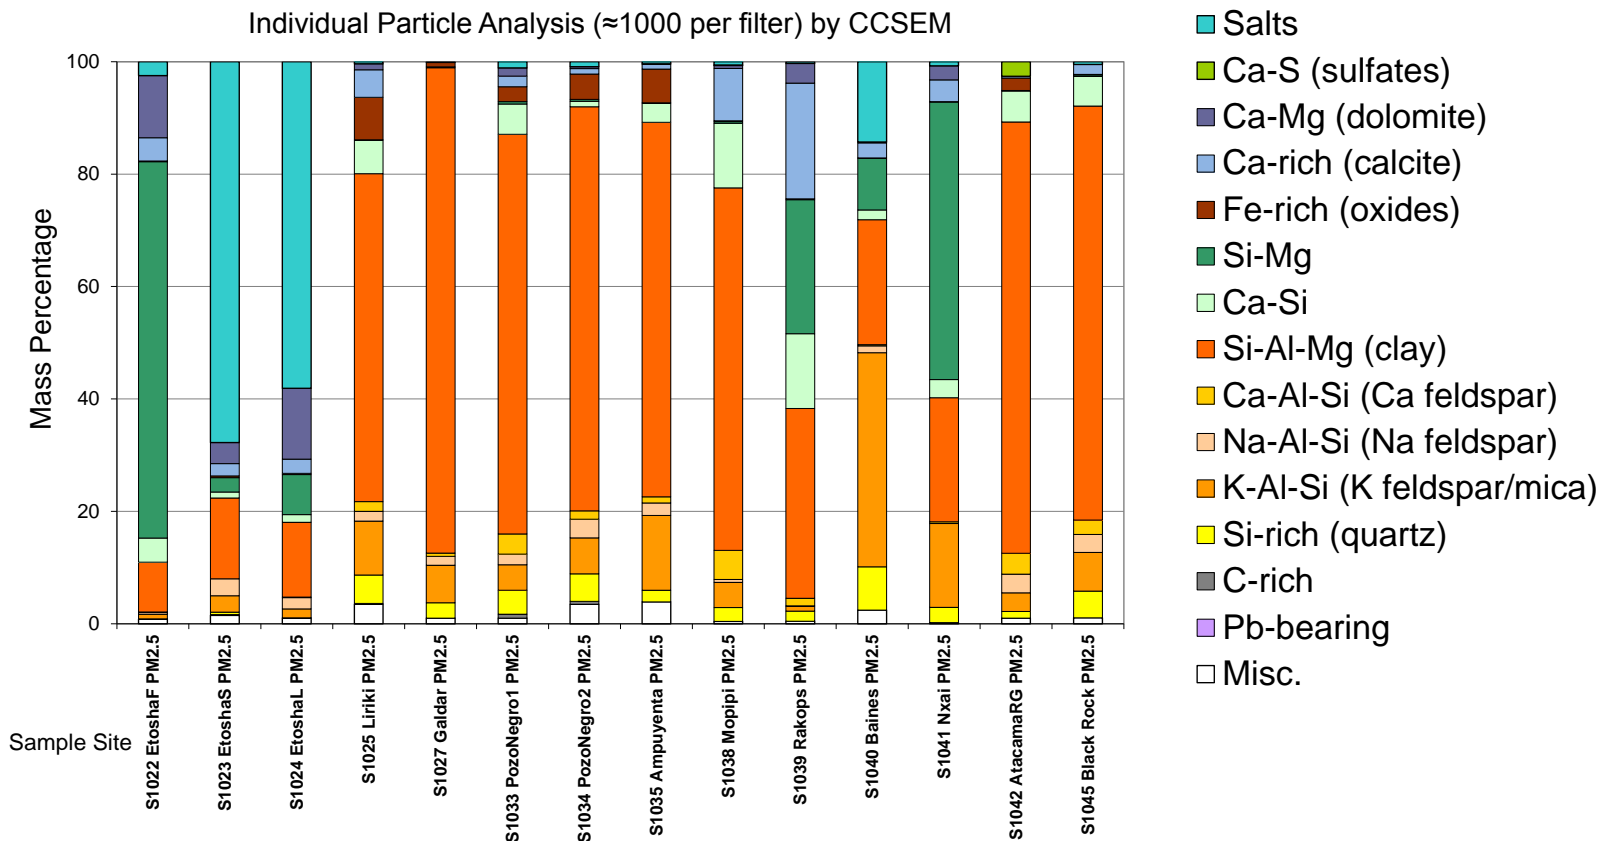

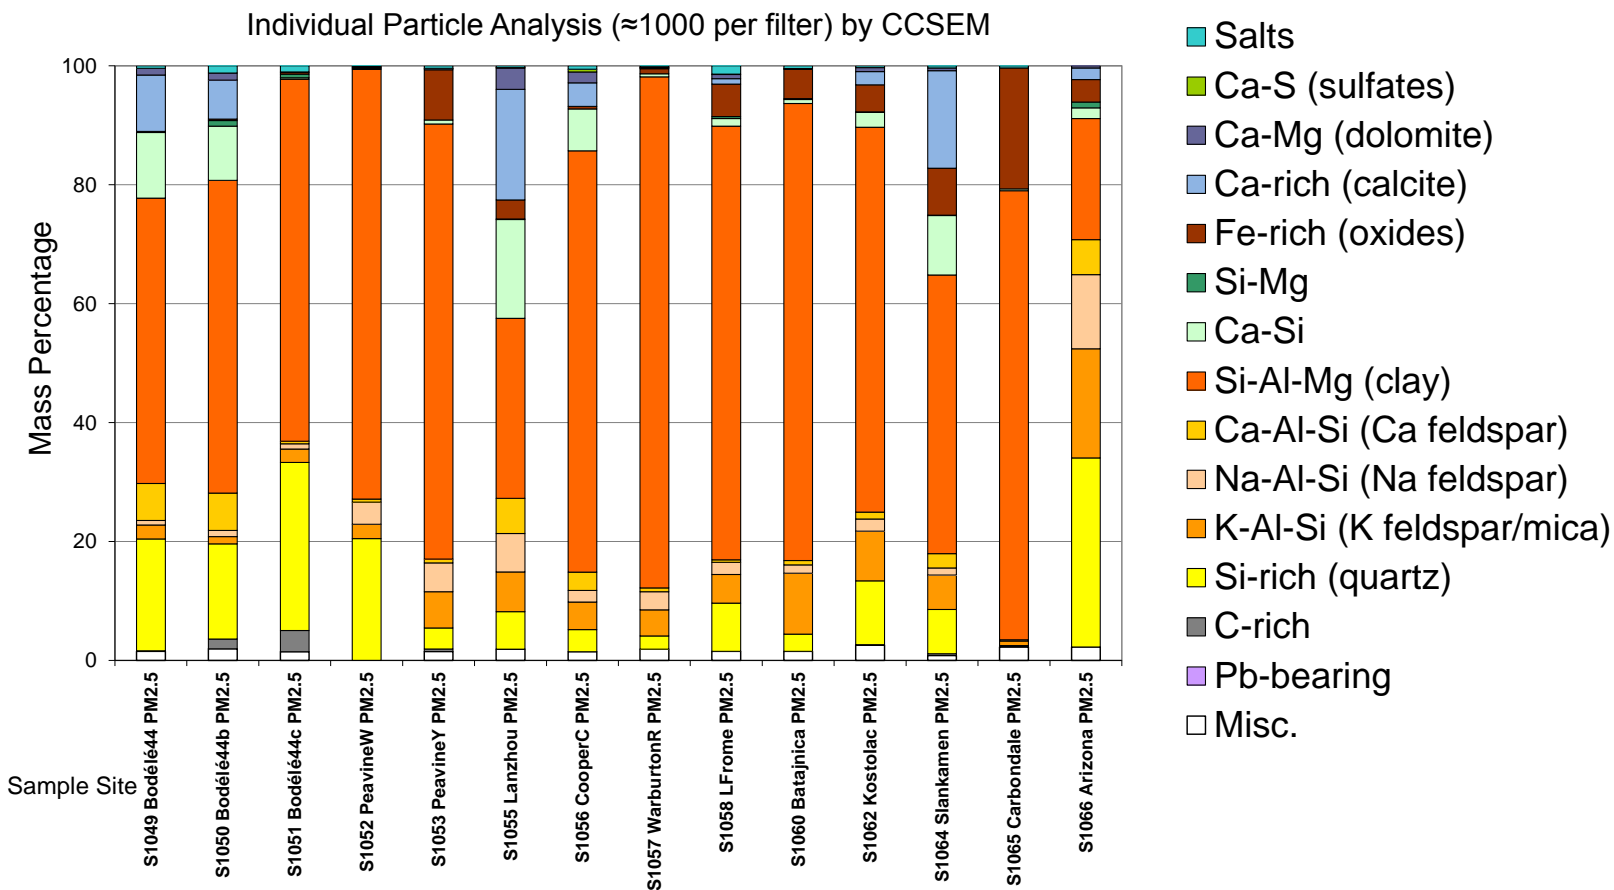

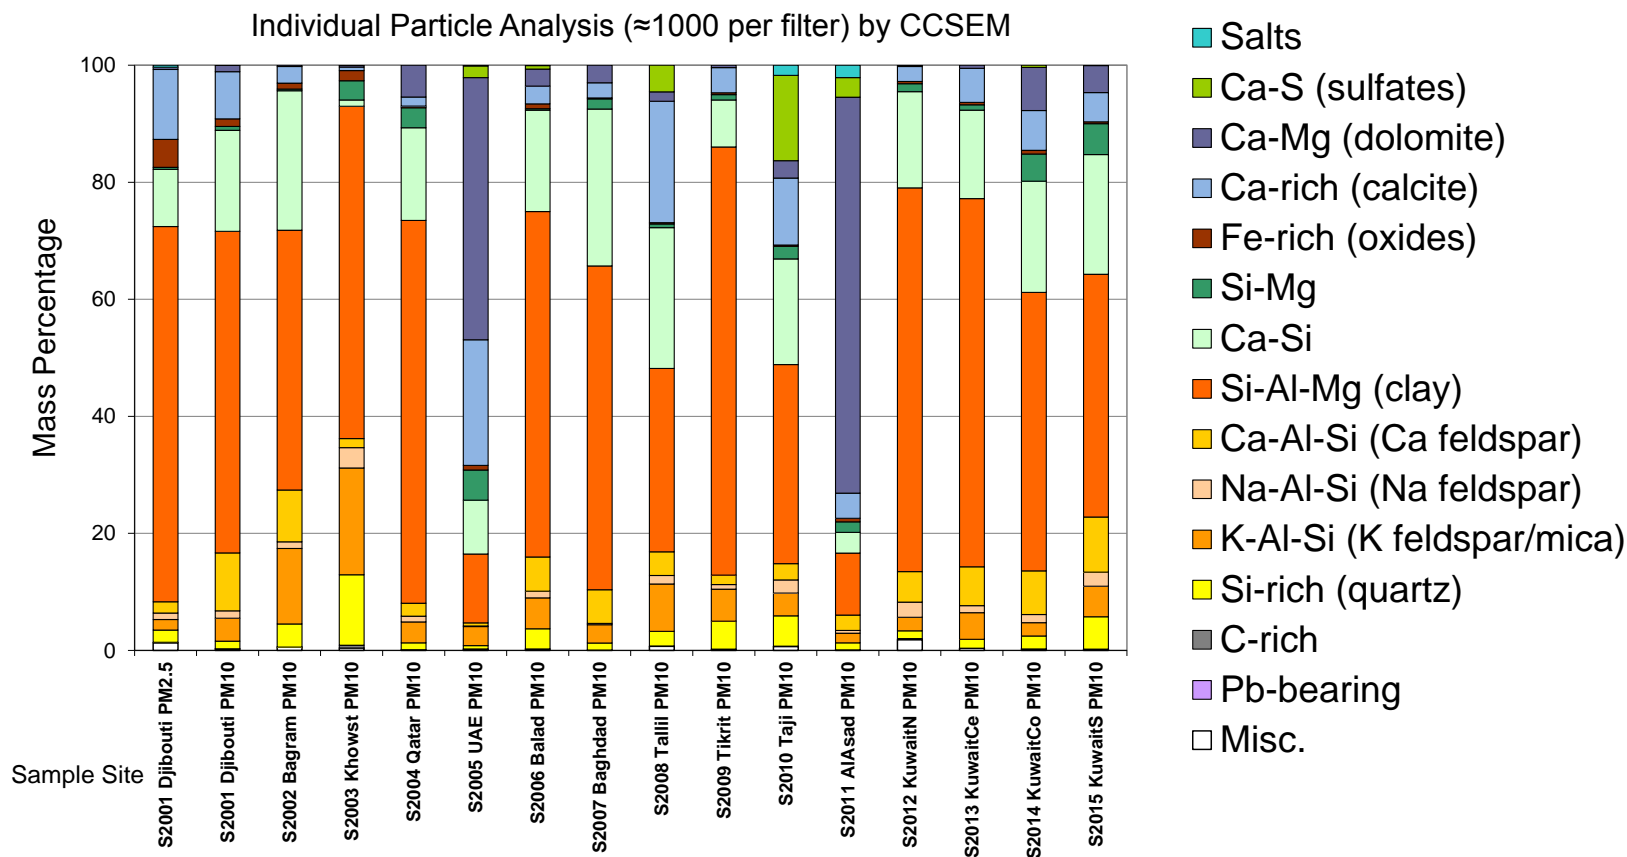

Individual Particle Analysis (≈1000 per filter) by CCSEM

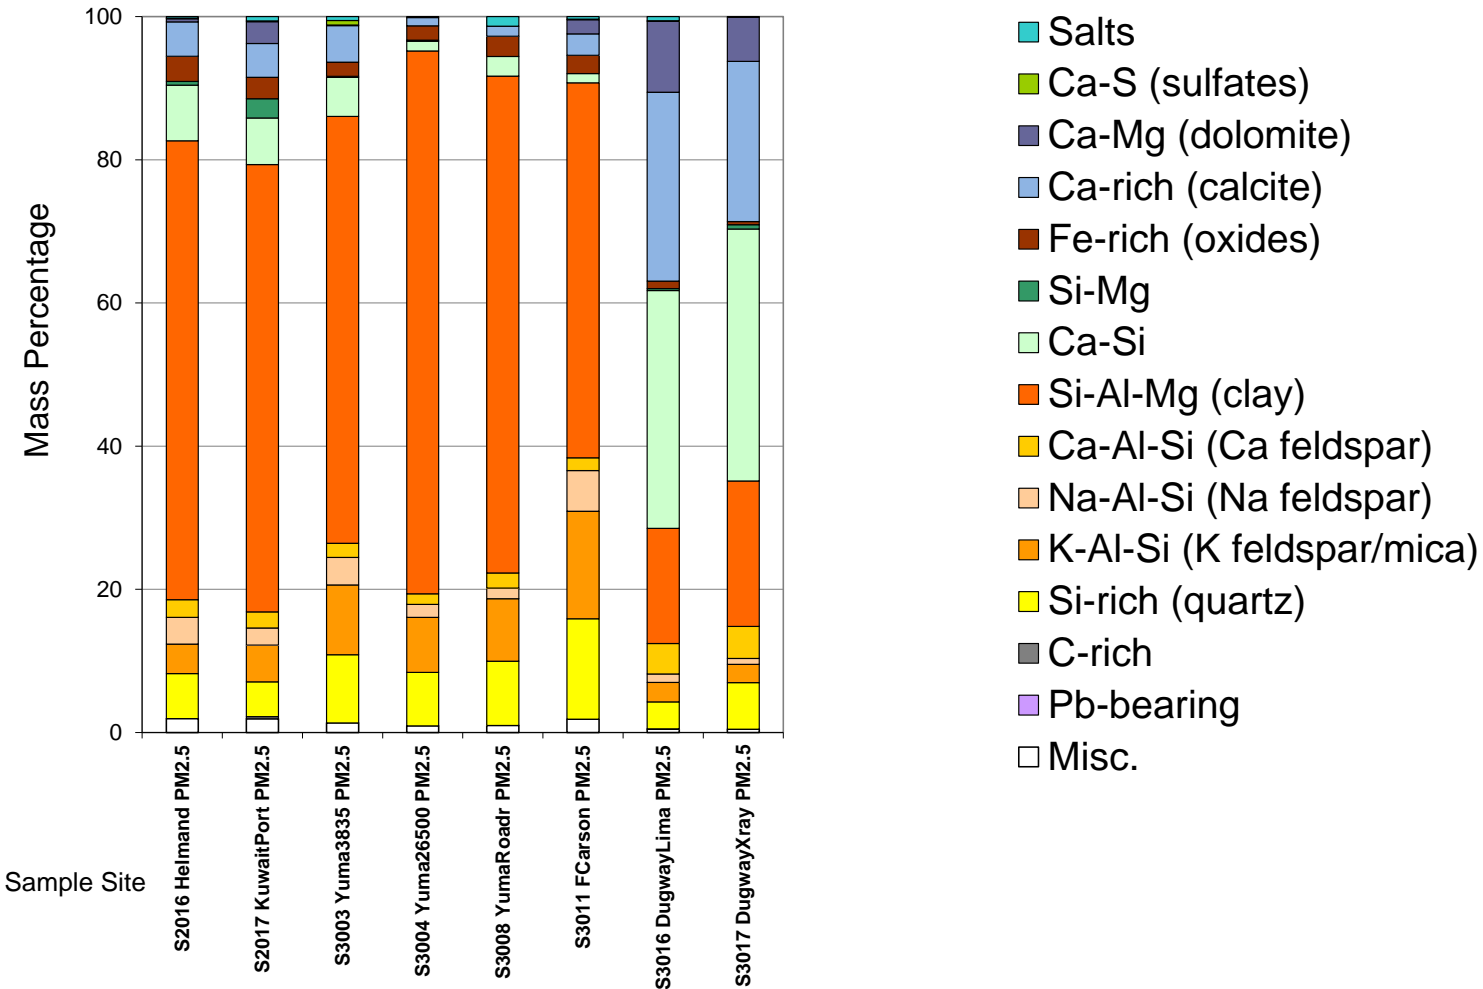

Supplement S5.4 – Statistics of SEM-based measurements of particle Aspect Ratios on PM2.5 sample sets

Scanning Electron Microscopically (SEM) measured Aspect Ratios on PM<sub>2.5</sub> samples

| Sample # | Country                              | Number of Particles | Min   | Max    | Ave     | Median | Mode  | Geom Mean | Std Dev |
|----------|--------------------------------------|---------------------|-------|--------|---------|--------|-------|-----------|---------|
| S1005    | Spain - Las Canarias - Lanzarote     | 1395                | 1.000 | 3.754  | 1.496   | 1.402  | 1.333 | 1.456     | 0.381   |
| S1006    | Spain - Las Canarias - Lanzarote     | 1349                | 1.000 | 3.875  | 1.492   | 1.408  | 1.500 | 1.457     | 0.350   |
| S1007    | Spain - Las Canarias - Lanzarote     | 1417                | 1.000 | 4.142  | 1.538   | 1.428  | 1.333 | 1.489     | 0.427   |
| S1008    | Spain - Las Canarias - Lanzarote     | 1396                | 1.000 | 5.286  | 1.505   | 1.399  | 1.167 | 1.460     | 0.420   |
| S1009    | Mali                                 | 1263                | 1.000 | 5.300  | 1.555   | 1.459  | 1.333 | 1.507     | 0.426   |
| S1010    | Mali                                 | 1275                | 1.004 | 3.922  | 1.510   | 1.426  | 1.500 | 1.469     | 0.383   |
| S1011    | Mali                                 | 1353                | 1.000 | 5.014  | 1.501   | 1.408  | 1.250 | 1.460     | 0.380   |
| S1013    | Cape Verde                           | 1392                | 1.008 | 4.160  | 1.448   | 1.366  | 1.500 | 1.415     | 0.336   |
| S1014    | China                                | 2336                | 1.000 | 4.570  | 1.499   | 1.419  | 1.500 | 1.446     | 0.364   |
| S1016    | China                                | 2405                | 1.000 | 4.035  | 1.458   | 1.372  | 1.125 | 1.405     | 0.352   |
| S1017    | China                                | 1318                | 1.000 | 4.525  | 1.518   | 1.425  | 2.000 | 1.473     | 0.411   |
| S1018    | China                                | 2418                | 1.000 | 6.711  | 1.460   | 1.366  | 1.333 | 1.407     | 0.394   |
| S1019    | USA                                  | 1302                | 1.005 | 5.285  | 1.547   | 1.431  | 1.172 | 1.494     | 0.462   |
| S1022    | Namibia                              | 1331                | 1.000 | 3.833  | 1.561   | 1.449  | 1.333 | 1.510     | 0.434   |
| S1023    | Namibia                              | 1400                | 1.000 | 3.922  | 1.498   | 1.398  | 1.500 | 1.457     | 0.384   |
| S1024    | Namibia                              | 1389                | 1.000 | 4.024  | 1.562   | 1.465  | 1.156 | 1.514     | 0.427   |
| S1025    | Morocco                              | 1328                | 1.008 | 5.461  | 1.542   | 1.441  | 1.500 | 1.493     | 0.445   |
| S1027    | Spain - Las Canarias - Gran Canaria  | 1383                | 1.000 | 3.691  | 1.552   | 1.454  | 1.500 | 1.506     | 0.411   |
| S1033    | Spain - Las Canarias - Fuerteventura | 1186                | 1.000 | 5.232  | 1.569   | 1.411  | 1.500 | 1.497     | 0.571   |
| S1034    | Spain - Las Canarias - Fuerteventura | 1826                | 1.006 | 8.500  | 1.699   | 1.458  | 2.000 | 1.586     | 0.771   |
| S1035    | Spain - Las Canarias - Fuerteventura | 1355                | 1.000 | 6.771  | 1.513   | 1.404  | 1.200 | 1.464     | 0.460   |
| S1038    | Botswana                             | 1340                | 1.000 | 3.815  | 1.521   | 1.432  | 1.333 | 1.478     | 0.400   |
| S1039    | Botswana                             | 1279                | 1.000 | 5.333  | 1.574   | 1.476  | 1.333 | 1.522     | 0.453   |
| S1040    | Botswana                             | 1392                | 1.000 | 4.227  | 1.491   | 1.379  | 1.500 | 1.447     | 0.402   |
| S1041    | Botswana                             | 1324                | 1.002 | 4.848  | 1.479   | 1.365  | 1.167 | 1.436     | 0.400   |
| S1042    | Chile                                | 1267                | 1.000 | 4.687  | 1.604   | 1.473  | 1.333 | 1.544     | 0.482   |
| S1045    | USA                                  | 1408                | 1.000 | 3.713  | 1.481   | 1.395  | 1.500 | 1.443     | 0.362   |
| S1049    | Chad                                 | 1162                | 1.000 | 5.213  | 1.692   | 1.571  | 2.000 | 1.622     | 0.536   |
| S1050    | Chad                                 | 1164                | 1.002 | 10.200 | 1.791   | 1.580  | 2.000 | 1.685     | 0.753   |
| S1051    | Chad                                 | 1157                | 1.000 | 7.859  | 1.826   | 1.580  | 2.000 | 1.698     | 0.833   |
| S1052    | USA                                  | 1132                | 1.000 | 7.222  | 1.726   | 1.550  | 1.333 | 1.630     | 0.688   |
| S1053    | USA                                  | 2394                | 1.000 | 4.467  | 1.464   | 1.375  | 1.250 | 1.411     | 0.358   |
| S1055    | China                                | 1316                | 1.000 | 6.889  | 1.548   | 1.441  | 2.000 | 1.495     | 0.477   |
| S1056    | Australia                            | 1365                | 1.000 | 5.133  | 1.525   | 1.406  | 1.286 | 1.476     | 0.433   |
| S1057    | Australia                            | 1408                | 1.005 | 3.562  | 1.473   | 1.405  | 1.500 | 1.440     | 0.332   |
| S1058    | Australia                            | 1431                | 1.000 | 4.671  | 1.478   | 1.377  | 1.333 | 1.439     | 0.376   |
| S1060    | Serbia                               | 1357                | 1.000 | 3.414  | 1.508   | 1.413  | 1.333 | 1.466     | 0.385   |
| S1062    | Serbia                               | 1315                | 1.000 | 9.629  | 1.568   | 1.442  | 1.333 | 1.505     | 0.542   |
| S1064    | Serbia                               | 1330                | 1.010 | 4.125  | 1.489   | 1.387  | 1.250 | 1.446     | 0.396   |
| S1065    | USA                                  | 1318                | 1.000 | 4.200  | 1.523   | 1.429  | 1.667 | 1.478     | 0.416   |
| S1066    | USA                                  | 1331                | 1.000 | 4.807  | 1.679   | 1.569  | 2.000 | 1.616     | 0.502   |
| S2001    | Djibouti                             | 1382                | 1.000 | 4.208  | 1.484   | 1.374  | 1.500 | 1.442     | 0.392   |
| S2016    | Afghanistan                          | 1338                | 1.000 | 10.346 | 1.539   | 1.415  | 1.500 | 1.482     | 0.522   |
| S2017    | Kuwait                               | 2345                | 1.000 | 5.934  | 1.476   | 1.384  | 1.500 | 1.434     | 0.406   |
| S3003    | USA                                  | 1428                | 1.003 | 3.576  | 1.496   | 1.394  | 1.500 | 1.455     | 0.386   |
| S3004    | USA                                  | 1393                | 1.000 | 3.479  | 1.510   | 1.420  | 2.000 | 1.469     | 0.383   |
| S3008    | USA                                  | 1418                | 1.000 | 6.300  | 1.554   | 1.440  | 1.250 | 1.499     | 0.477   |
| S3011    | USA                                  | 1405                | 1.000 | 6.573  | 1.501   | 1.394  | 1.250 | 1.456     | 0.424   |
| S3016    | USA                                  | 1361                | 1.000 | 5.121  | 1.601   | 1.483  | 1.333 | 1.546     | 0.462   |
| S3017    | USA                                  | 1324                | 1.000 | 5.115  | 1.593   | 1.479  | 1.250 | 1.536     | 0.474   |
| Average  |                                      | 1448                | 1.001 | 5.214  | 1.544   | 1.432  | 1.465 | 1.491     | 0.449   |
| Min      |                                      | 1132                | 1     | 3.414  | 1.4483  | 1.365  | 1.125 | 1.41      | 0.332   |
| Max      |                                      | 2418                | 1.01  | 10.346 | 1.82608 | 1.58   | 2     | 1.70      | 0.833   |



Supplement S5.5 - SEM-based Secondary Electron Images and EDS Spectra

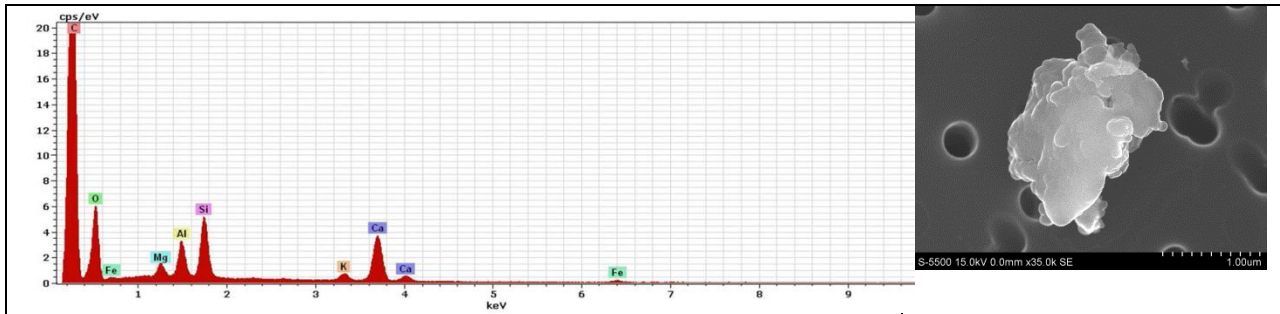

Sample S1005: Las Canarias, Lanzarote Island. Composite particle of clay (illite) (Mg, Al, Si, K, Fe) on calcite (Ca)

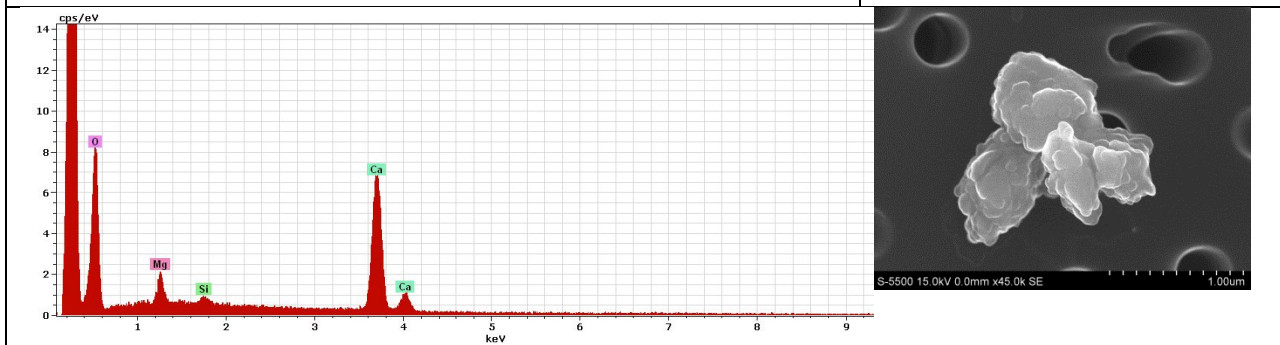

Sample S1006: Las Canarias: Lanzarote Island. Calcite (Ca) particle with some dolomite (Ca, Mg) and trace of a silicate (Si) mineral

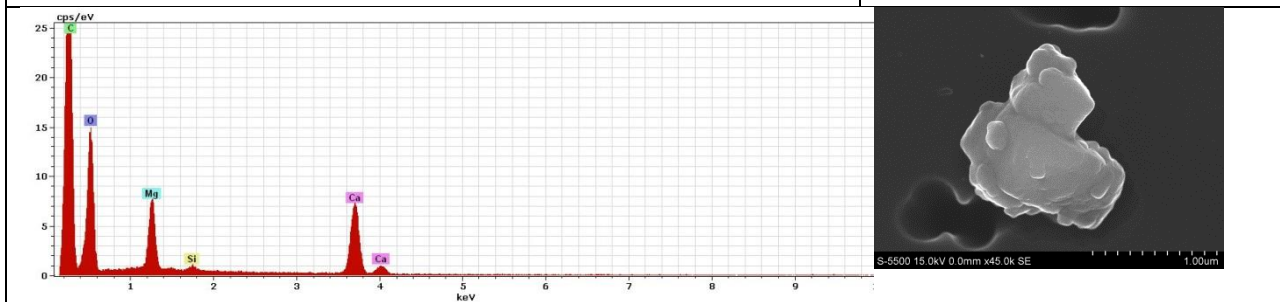

Sample S1007: Las Canarias: Lanzarote Island. Dolomite (Mg, Ca) particle with traces of silicate mineral (Si)

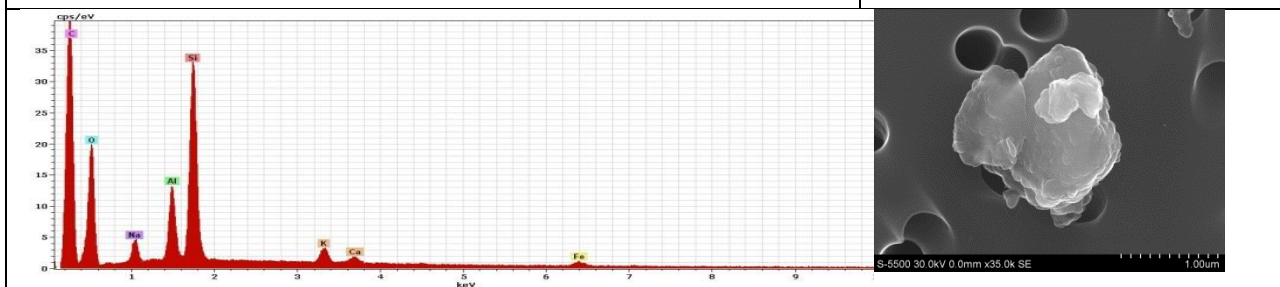

Sample S1008: Las Canarias: Lanzarote Island. Alkaline feldspar (Na, Al, Si, K, Ca, Fe), (albite plagioclase) particle

Supplement S5.5 - SEM-based Secondary Electron Images and EDS Spectra

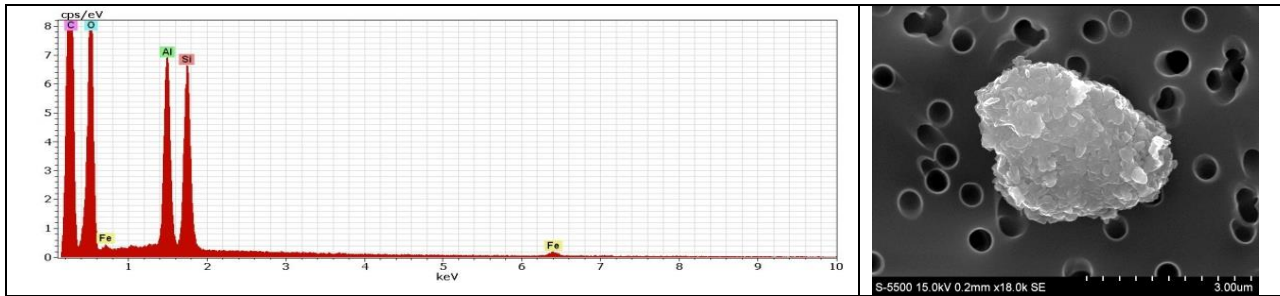

Sample S1009: Mali, Bamako. Particle of polycrystalline kaolinite (Al, Si) with trace of iron (Fe), possible goethite or hematite

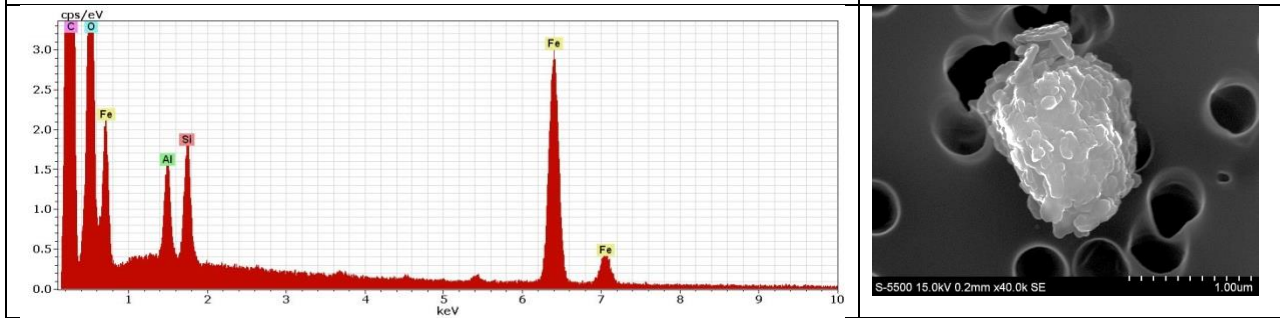

Sample S1009: Mali, Bamako. Composite particle of kaolinite (Al, Si) and iron oxide (Fe), possibly goethite or hematite

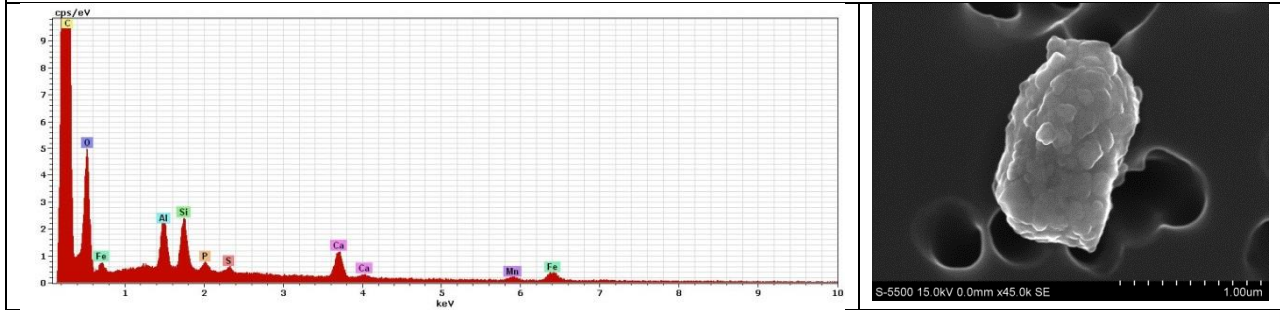

Sample S1010: Mali, Bamako. Composite particle of several possible minerals, including kaolinite (Al, Si), calcite (Ca), apatite (Ca, P), gypsum (Ca, S), iron oxide (Fe), possibly goethite or hematite, and manganese oxides (Mn)

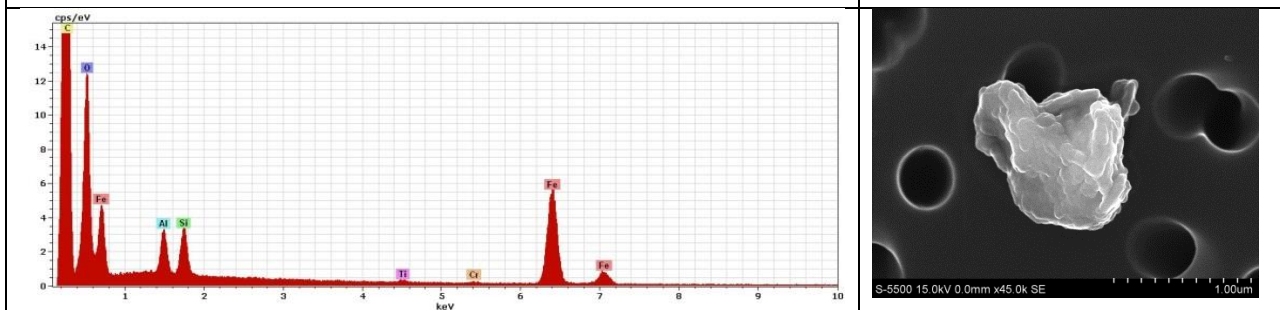

Sample S1010: Mali, Bamako. Composite particle of kaolinite (Al, Si) and iron oxide (Fe), possibly goethite or hematite, with traces of titanium (Ti) and chromium (Cr)

Supplement S5.5 - SEM-based Secondary Electron Images and EDS Spectra

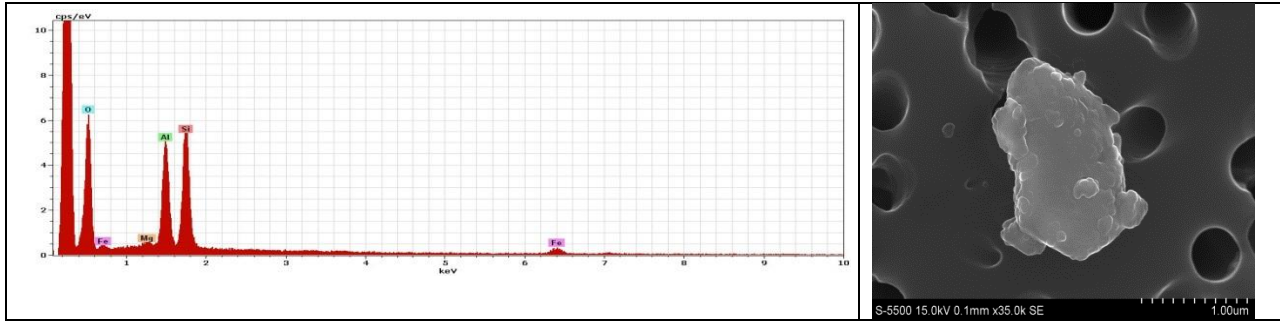

Sample S1011: Mali, West Bamako. Particle of kaolinite (Al, Si) with minor amounts of iron oxide (Fe), possibly goethite or hematite and montmorillonite (Mg, Al, Si)

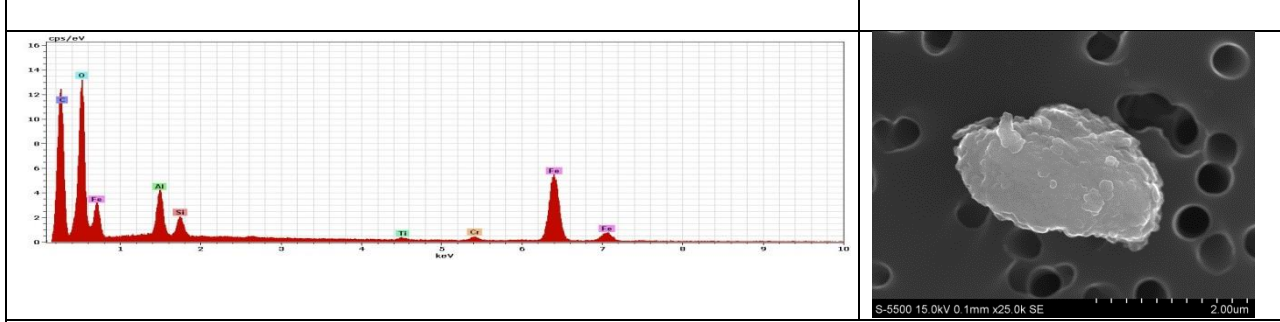

Sample S1011: Mali, West Bamako. Composite particle of kaolinite (Al, Si), possibly a bauxite mineral gibbsite (Al), and iron oxide (Fe), goethite or hematite, with traces of titanium (Ti) and chromium (Cr)

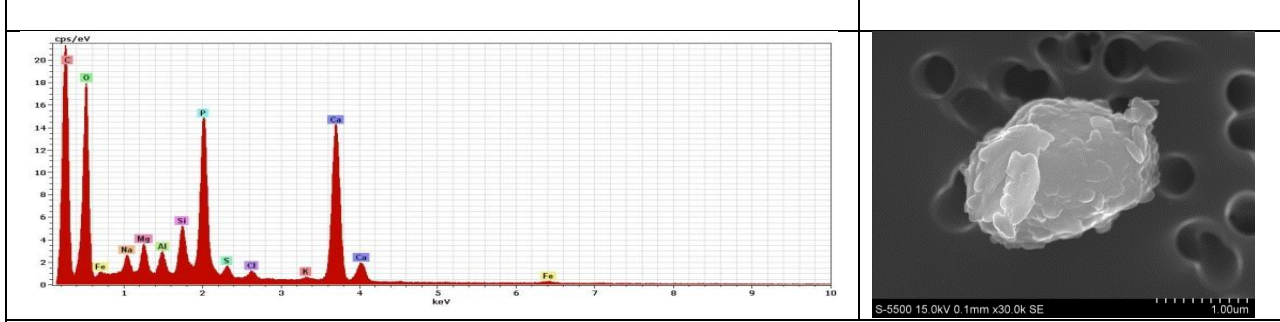

Sample S1013: Cape Verde. Composite particle of apatite (Ca, P), with possible minor amounts of illite clay (Mg, Al, Si, K, Fe), gypsum (Ca, S), and halite (Na, Cl)

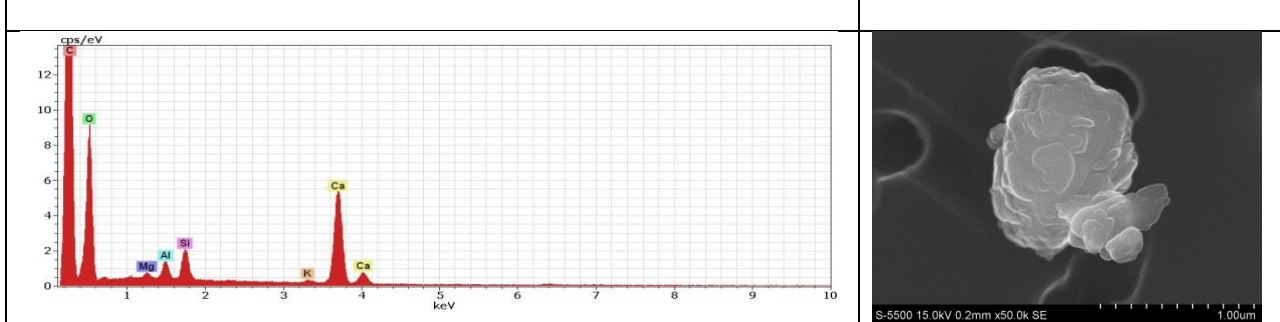

Sample S1014: NW China. Calcite (Ca) with surface coating of illite (Mg, Al, Si, K)

Supplement S5.5 - SEM-based Secondary Electron Images and EDS Spectra

|                                                                                                                                                               |                                                                                      |
|---------------------------------------------------------------------------------------------------------------------------------------------------------------|--------------------------------------------------------------------------------------|
| 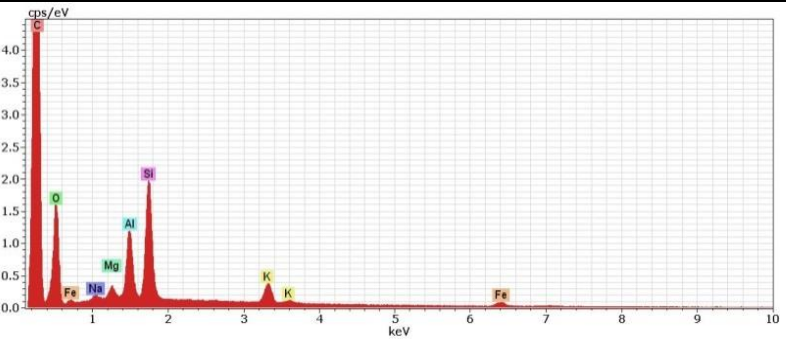                                                                             |    |
| <p>Sample S1014: NW China. Particle of the clay mineral illite (Mg, Al, Si, K, Fe) and trace of halite (Na)</p>                                               |                                                                                      |
|                                                                              |    |
| <p>Sample S1014: NW China. Particle of the quartz (Si) with the clay mineral illite (Mg, Al, Si, K, Fe) and trace amounts of calcite (Ca) and halite (Na)</p> |                                                                                      |
|                                                                            |  |
| <p>Sample S1016: NW China: Particle, possibly of the amphibole (hornblende) (Na, Mg, Al, Si, K, Ca, Ti, Fe) mixed with illite clay (Mg, Al, Si, K, Fe)</p>    |                                                                                      |
|                                                                            |  |
| <p>Sample S1016: NW China: Quartz (Si) particle with small amount of clay (Al, Si, K) attached</p>                                                            |                                                                                      |

Supplement S5.5 - SEM-based Secondary Electron Images and EDS Spectra

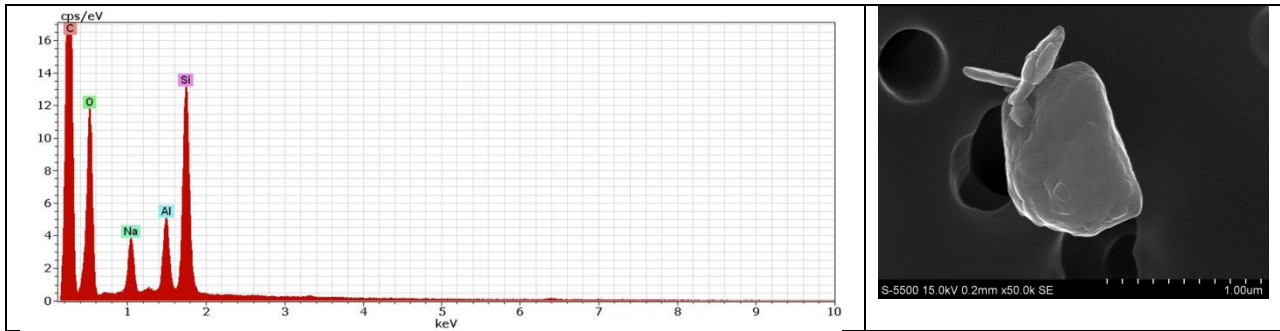

Sample S1017: NW China. Plagioclase feldspar (Na, Al, Si) with needles of undetermined phase

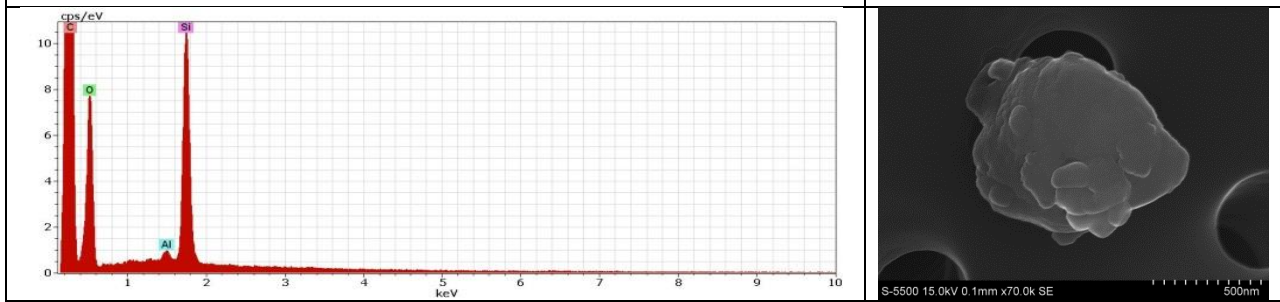

Sample S1018: NW China. Quartz particle (Si) with small amount of clay (Al)

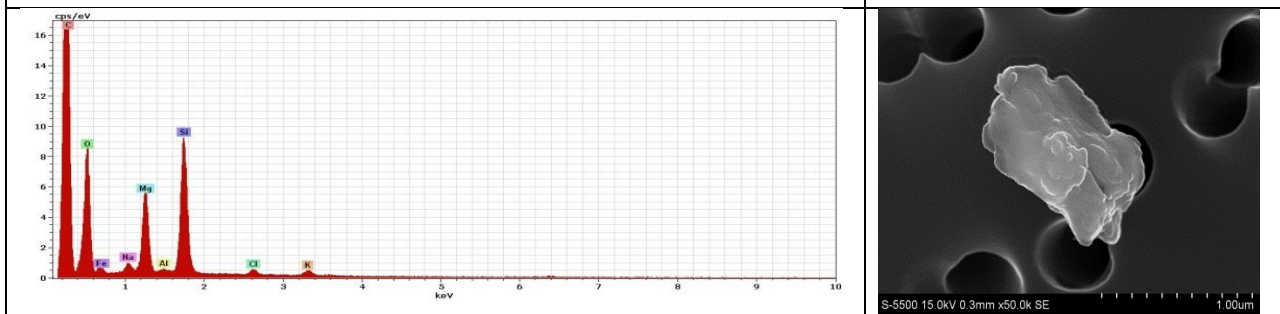

Sample S1019: USA, Owens Lake. Sepiolite or serpentine (Mg, Si) particle with traces of halite (Na, Cl) and illite clay (Mg, Al, Si, K, Fe)

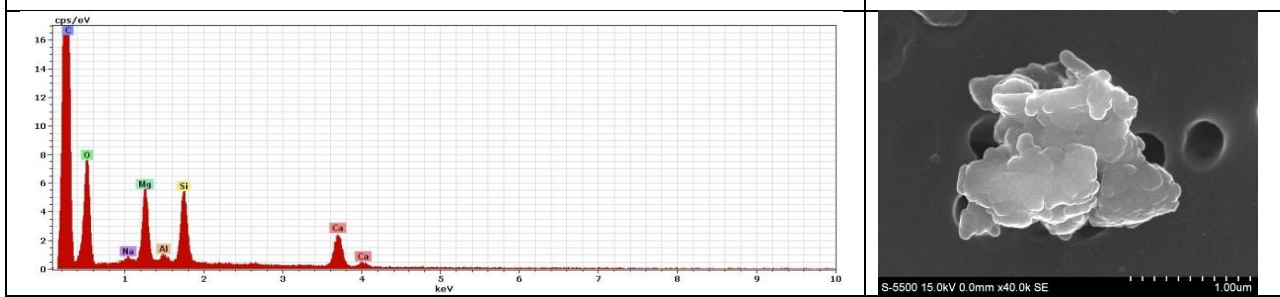

Sample S1022: Namibia, Etosha: Composite particle of sepiolite or serpentine (Mg, Si) and calcite (Ca), and/or dolomite (Mg, Ca) with traces of halite (Na) and clay (Al, Si)

Supplement S5.5 - SEM-based Secondary Electron Images and EDS Spectra

|                                                                                                                                    |  |
|------------------------------------------------------------------------------------------------------------------------------------|--|
|                                                                                                                                    |  |
| <p>Sample S1023: Namibia, Etosha. Particle of thenardite (Na, S) with trace of quartz (Si)</p>                                     |  |
|                                                                                                                                    |  |
| <p>Sample S1023: Namibia, Etosha: Particle of dolomite (Mg, Ca) with traces of halite (Na, Cl) and of quartz (Si)</p>              |  |
|                                                                                                                                    |  |
| <p>Sample S1024: Namibia, Etosha: Rhombohedral particle of dolomite (Mg, Ca) with traces of thenardite (Na, S) and quartz (Si)</p> |  |
|                                                                                                                                    |  |
| <p>Sample S1025: Morocco, Iriki: Particle of possibly amphibole (hornblende) (Na, Mg, Al, Si, K, Ca, Fe)</p>                       |  |

Supplement S5.5 - SEM-based Secondary Electron Images and EDS Spectra

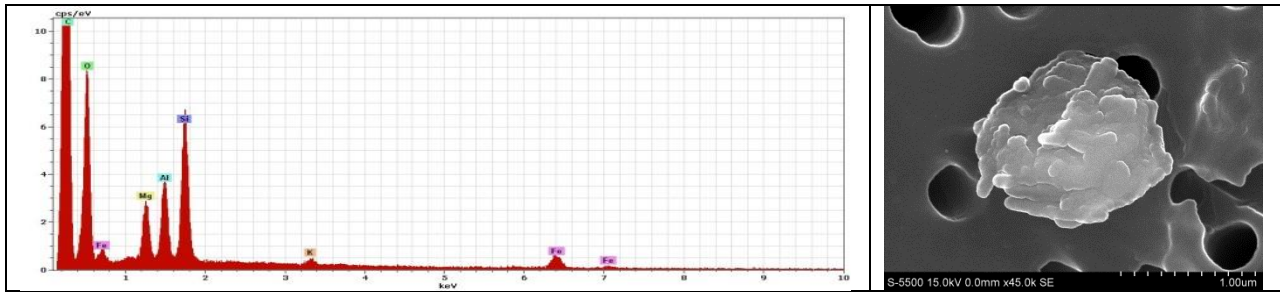

Sample S1025: Morocco, Iriki: Cluster of illite (Mg, Al, Si, K, Fe) or palygorskite clay particles

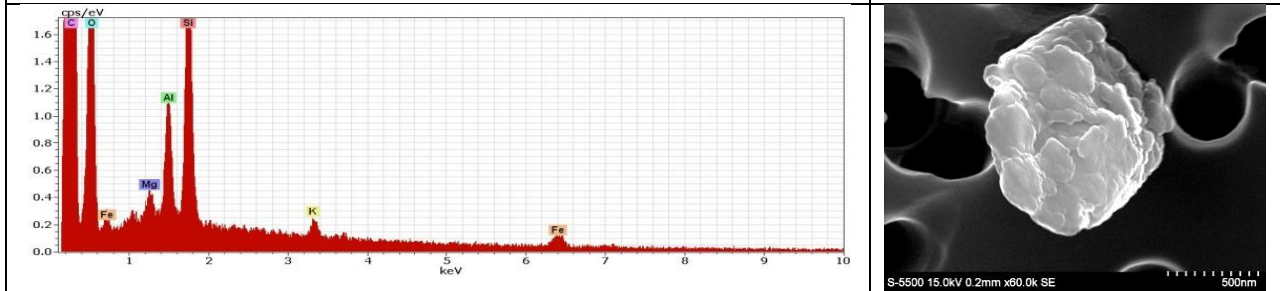

Sample S1027: Spain, Gran Canaria: Particle of illite clay (Mg, Al, Si, K, Fe)

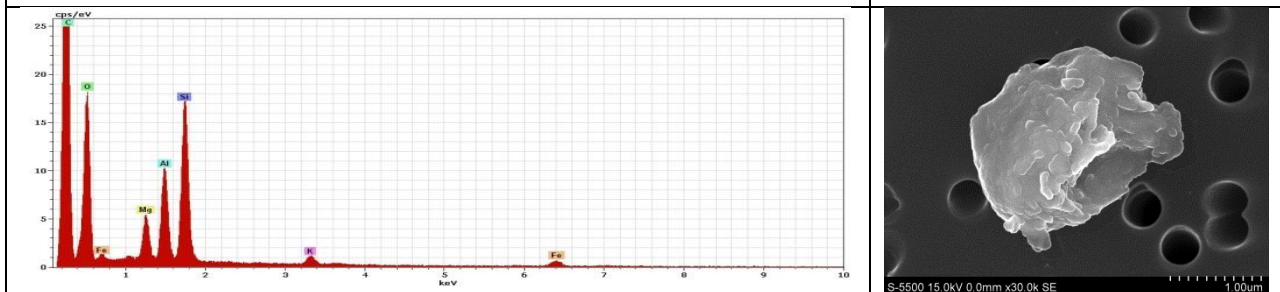

Sample S1033: Spain, Fuerteventura: Cluster of illite (Mg, Al, Si, K, Fe) or palygorskite clay particles

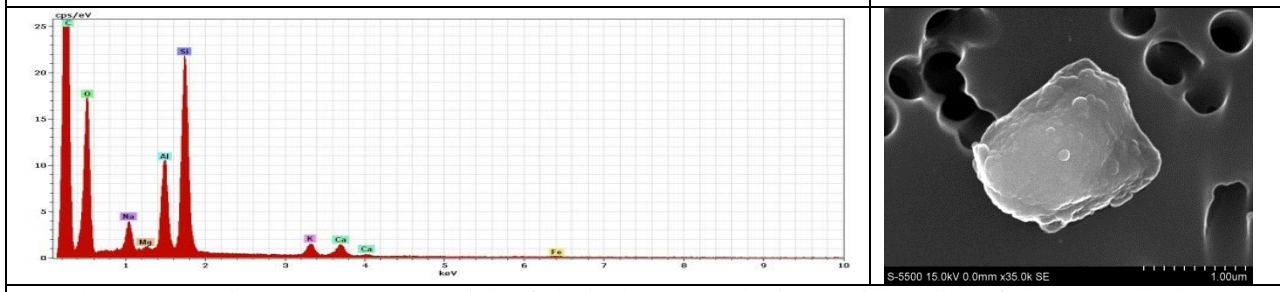

Sample S1033: Spain, Fuerteventura: Particle of plagioclase (Na, Al, Si, Ca) with coating of clay (Mg, Al, Si, K, Fe)

Supplement S5.5 - SEM-based Secondary Electron Images and EDS Spectra

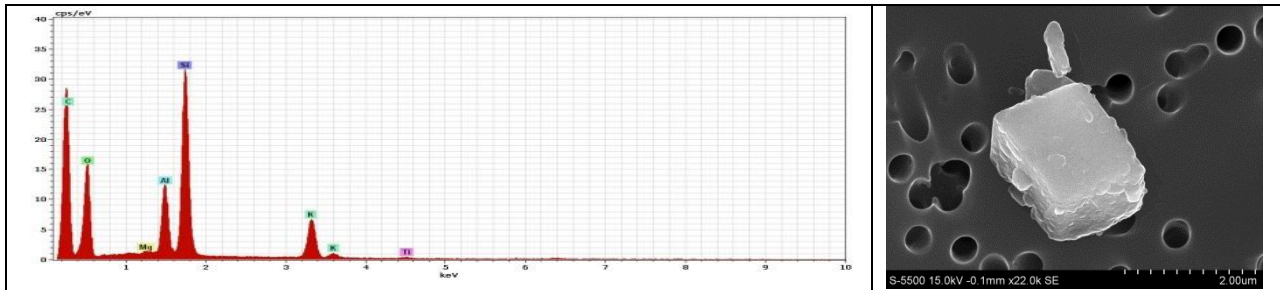

Sample S1034: Spain, Fuerteventura: Cleavage flake of potassium feldspar (orthoclase) (Al, Si, K) with traces of clay (Mg, Al)

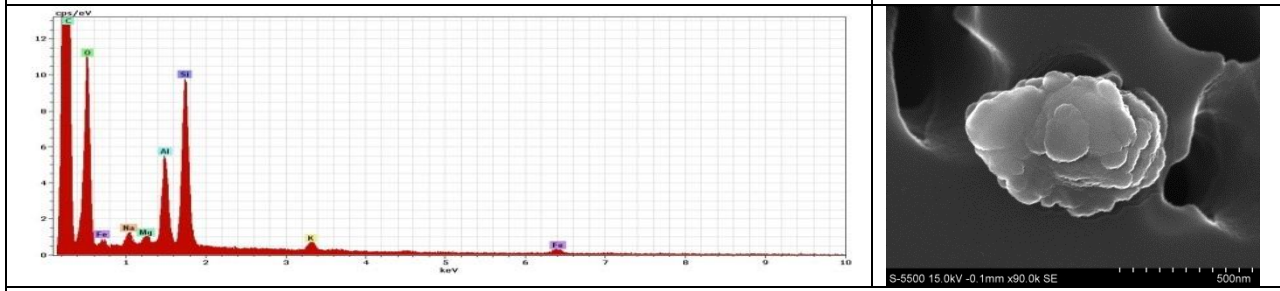

Sample S1034: Spain, Fuerteventura: Particle of kaolinite clay (Al, Si) with trace amounts of other clays and possibly mica (K, Mg, K, Fe)

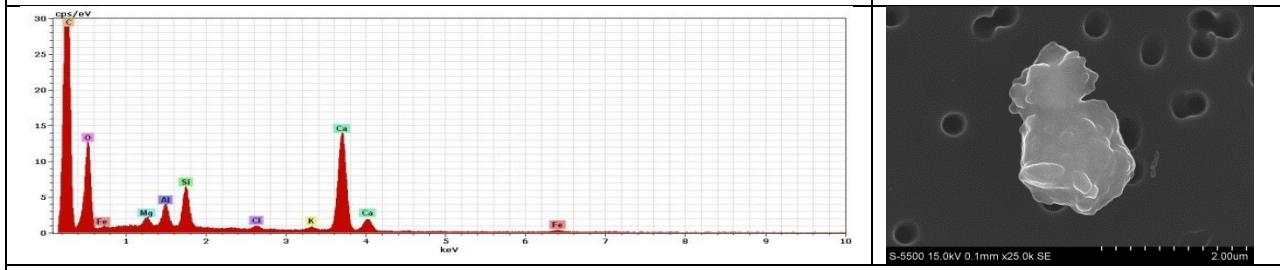

Sample S1035: Spain, Fuerteventura: Calcite particle (Ca) with illite (Mg, Al, Si, K, Fe) clay coating and trace of halite (Cl)

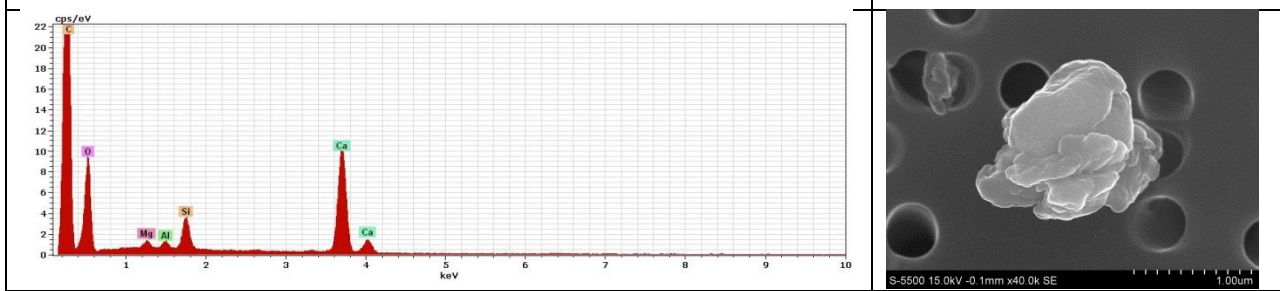

Sample S1038: Botswana, Makgadikgadi: Calcite particle (Ca) with small amounts of illite (Mg, Al, Si, K, Fe) clay attached



Supplement S5.5 - SEM-based Secondary Electron Images and EDS Spectra

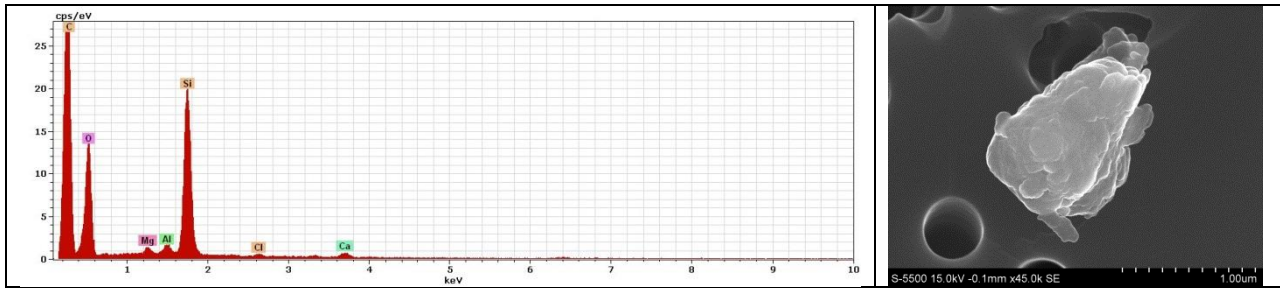

Sample S1038: Botswana, Makgadikgadi: Quartz particle (Si) with small amounts of clay (Mg, Al, Si) and traces of halite (Cl) and calcite/dolomite (Ca, Mg) attached

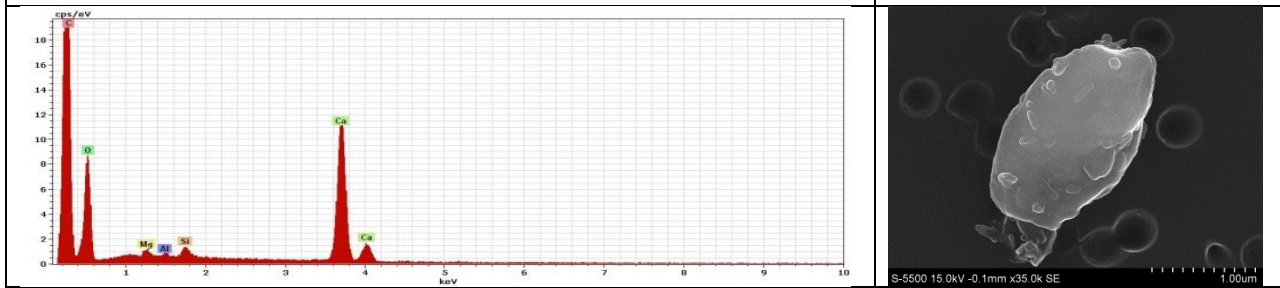

Sample S1039: Botswana, Makgadikgadi: Rounded calcite particle (Ca) with small attachments of clay (Mg, Al, Si)

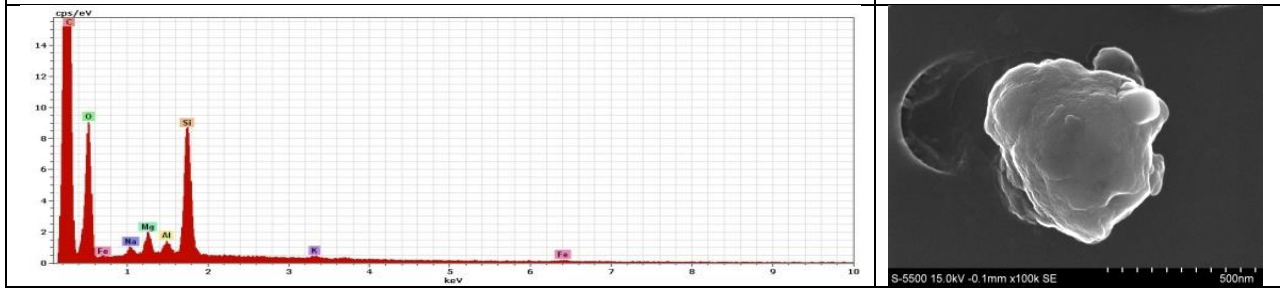

Sample S1039: Botswana, Makgadikgadi: Rounded quartz particle (Si) with small attachments of clay (Mg, Al, Si, K, Fe) and trace of halite (Na)

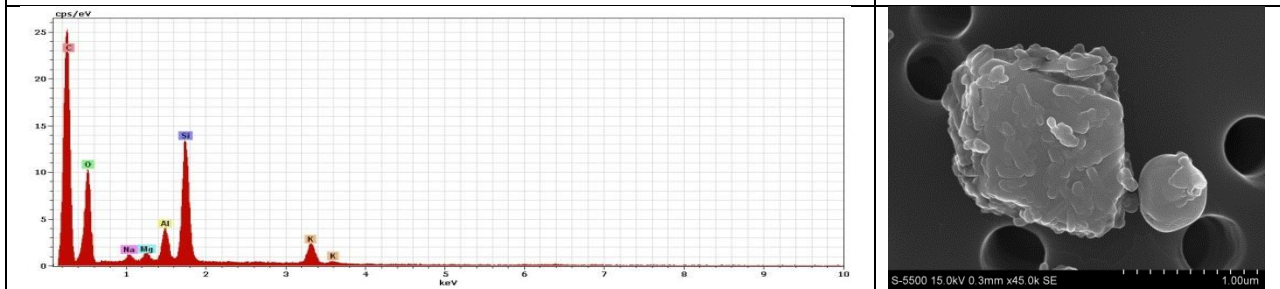

Sample S1040: Botswana, Makgadikgadi: Angular cleavage flake of potassium feldspar (K, Al, Si, Na) completely coated by clay (Mg, Al, Si), possibly palygorskite. Smaller well rounded particle of halite to the lower right of feldspar

Supplement S5.5 - SEM-based Secondary Electron Images and EDS Spectra

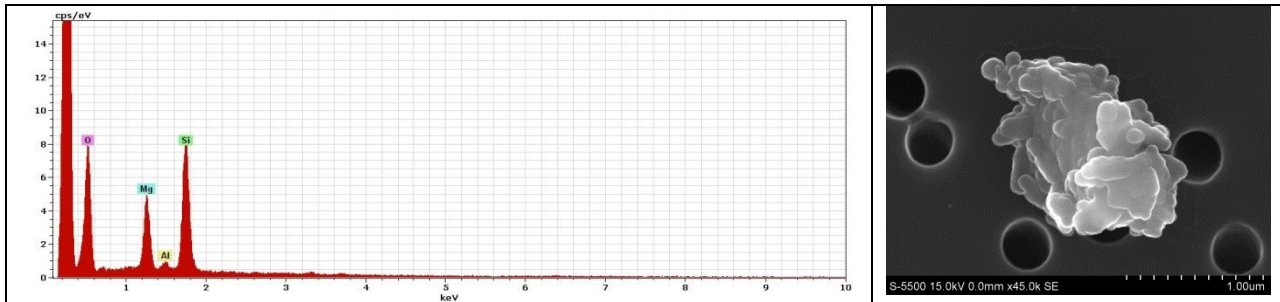

Sample S1041: Botswana, Nxai Pan: Clusters of finger shaped sepiolite (Mg, Si) crystals, with a trace of clay (Mg, Al, Si)

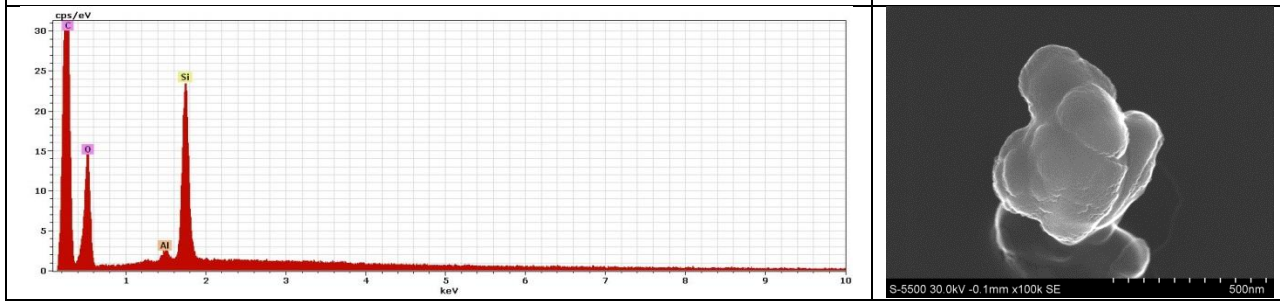

Sample S1042: Chile, Atacama: Clusters quartz grains (Si) with a trace of clay (Al)

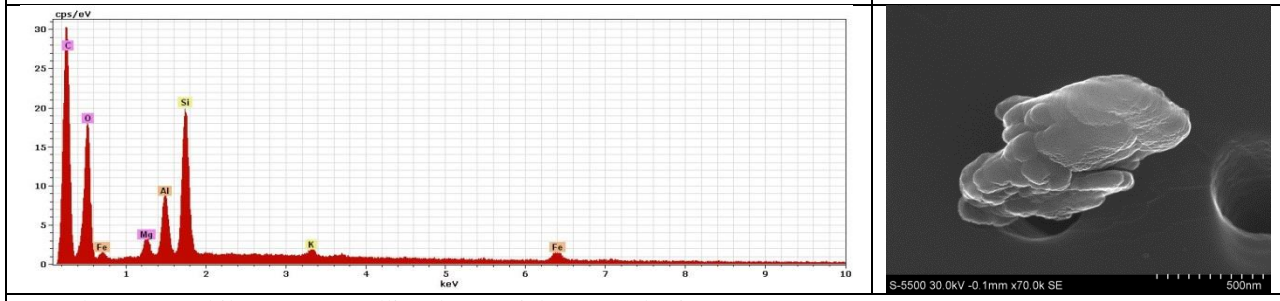

Sample S1042: Chile, Atacama: Illite clay particle (Mg, Al, Si, K, Fe)

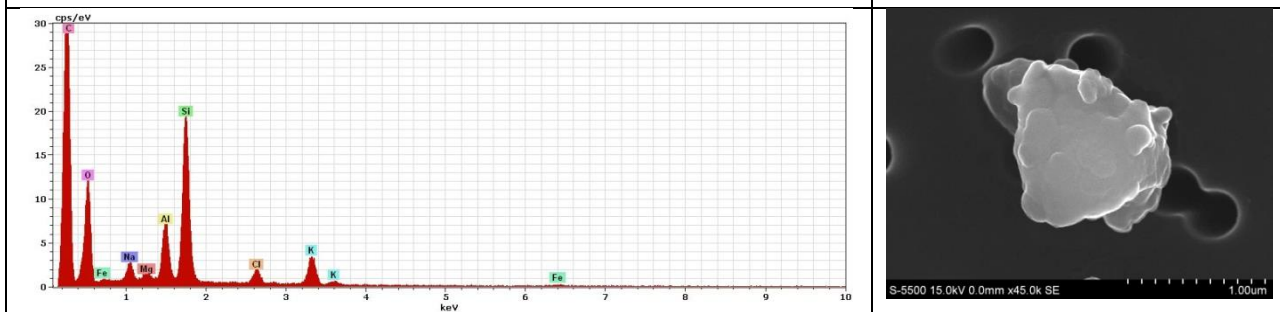

Sample S1045: USA, Nevada: Potassium feldspar (Na, Al, Si, K, Fe) with coating of halite (Na, Cl) and illite clay (Mg, Al, Si, K, Fe)

Supplement S5.5 - SEM-based Secondary Electron Images and EDS Spectra

|                                                                                                                           |  |
|---------------------------------------------------------------------------------------------------------------------------|--|
|                                                                                                                           |  |
| <p>Sample S1045: USA, Nevada: Quartz (Si) with coating of illite clay (Mg, Al, Si, K) and trace of halite (Na)</p>        |  |
|                                                                                                                           |  |
| <p>Sample S1049: Chad, Bodélé: Diatom (Si) with coating of possibly kaolinite clay (Al, Si) and trace of calcite (Ca)</p> |  |
|                                                                                                                           |  |
| <p>Sample S1049: Chad, Bodélé: Smooth quartz (Si) particle with coating of possibly kaolinite clay (Al, Si)</p>           |  |
|                                                                                                                           |  |
| <p>Sample S1050: Chad, Bodélé: Diatom (Si) particle with traces of kaolinite clay (Al, Si) and calcite (Ca)</p>           |  |

Supplement S5.5 - SEM-based Secondary Electron Images and EDS Spectra

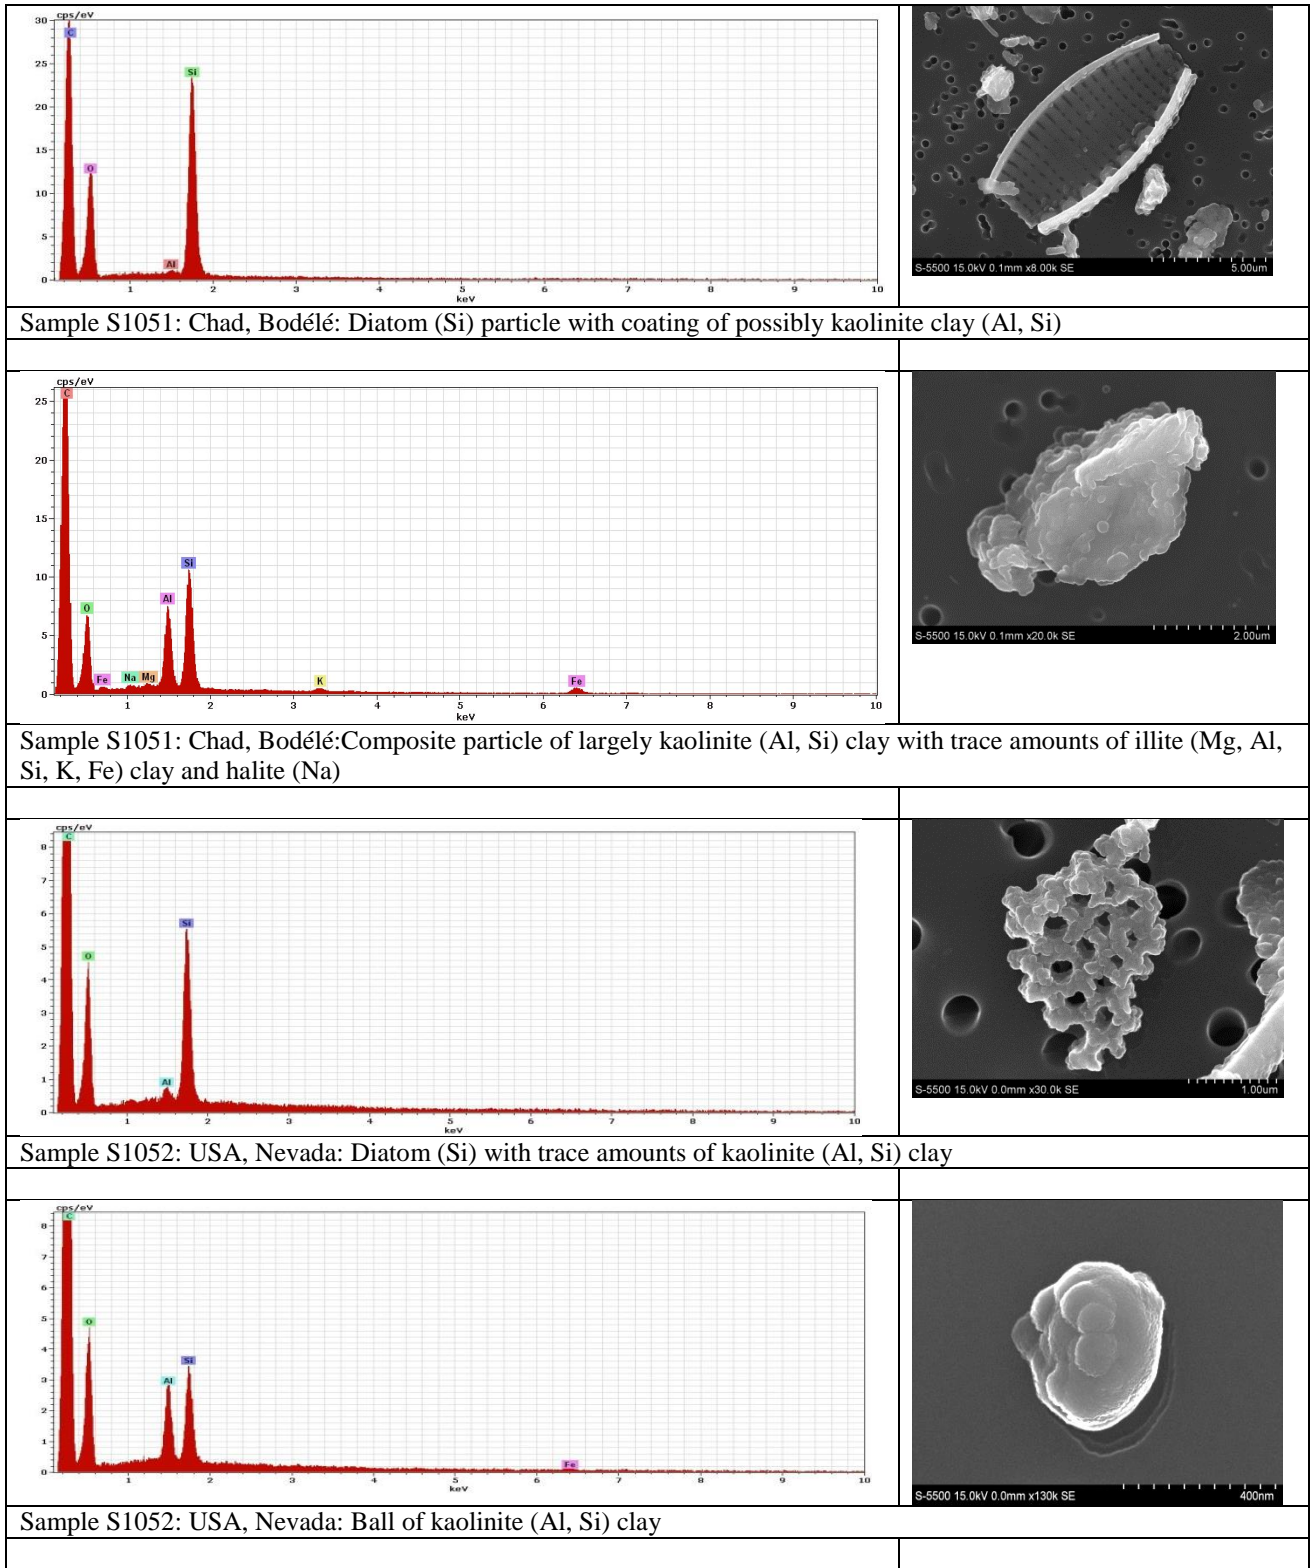

Supplement S5.5 - SEM-based Secondary Electron Images and EDS Spectra

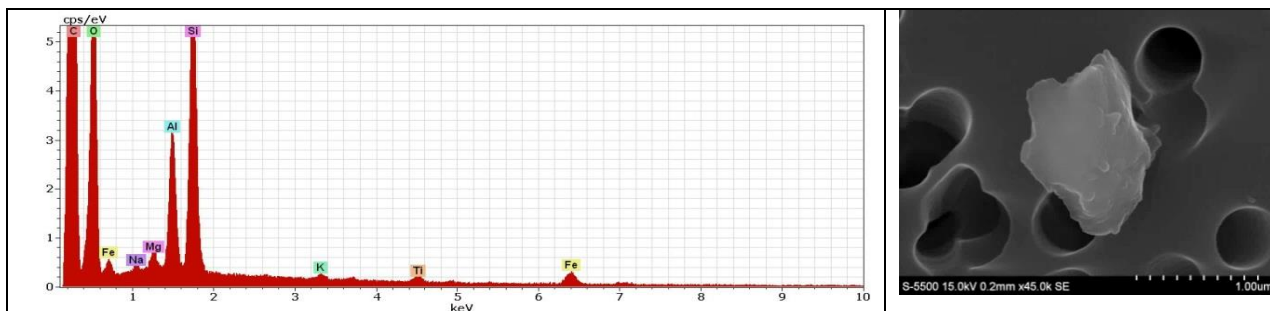

Sample S1052: USA, Nevada: Particle of biotite (Na, Mg, Al, Si, K, Ti, Fe)

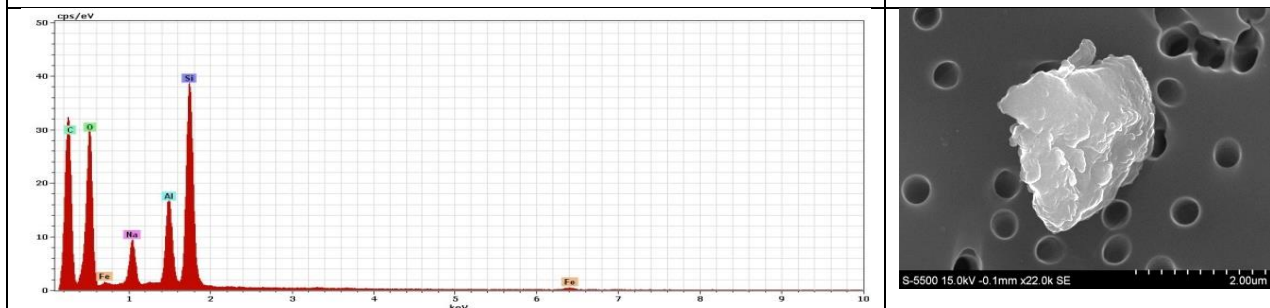

Sample S1053: USA, Nevada: Particle of possibly albite feldspar (Na, Al, Si)

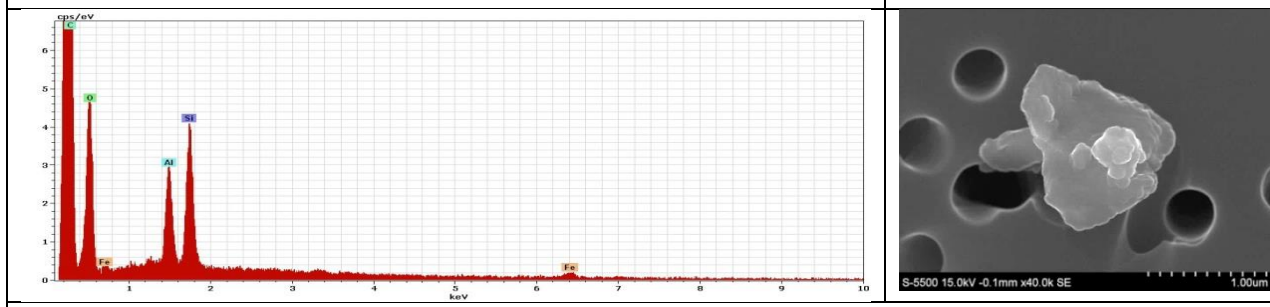

Sample S1053: USA, Nevada: Particle of kaolinite clay (Al, Si) with impurity of iron oxide/hydroxide (Fe)

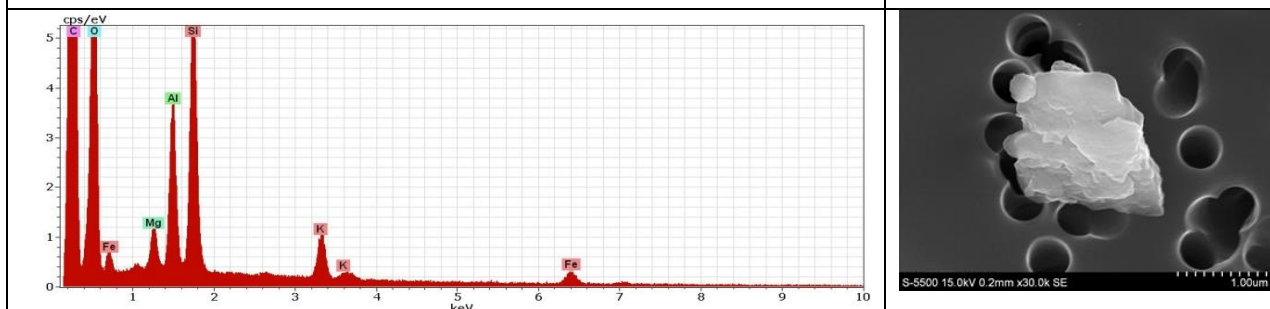

Sample S1055: China, Lanzhou: Particle of illite clay (Mg, Al, Si, K, Fe)

Supplement S5.5 - SEM-based Secondary Electron Images and EDS Spectra

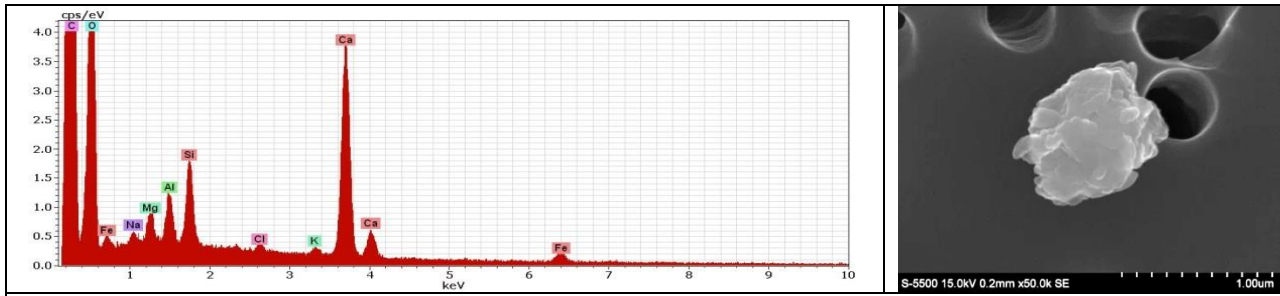

Sample S1055: China, Lanzhou: Composite particle of illite clay (Mg, Al, Si, K, Fe) and calcite (Ca) with impurities of halite (Na, Cl)

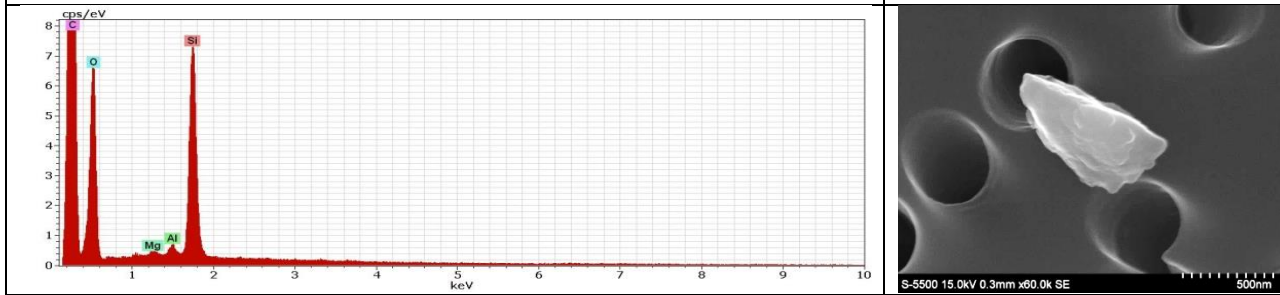

Sample S1055: China, Lanzhou: Wedge shaped quartz (Si) particle with small amount clay (Mg, Al) attached

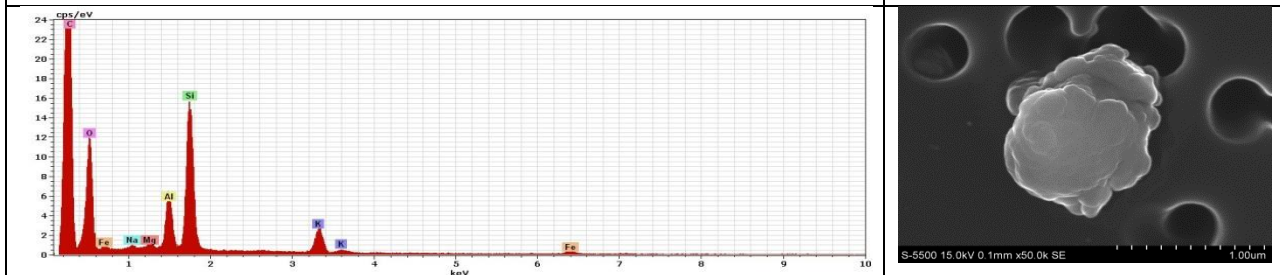

Sample S1056: Australia, Lake Eyre: Rounded illite clay (Mg, Al, Si, K, Fe) particle with trace of halite (Na)

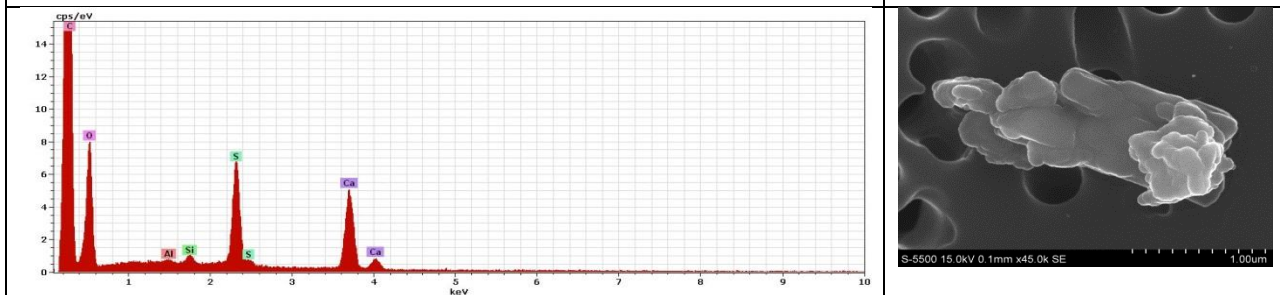

Sample S1056: Australia, Lake Eyre: Irregular shaped gypsum (Ca, S) particle with trace of clay (Al, Si)

Supplement S5.5 - SEM-based Secondary Electron Images and EDS Spectra

|                                                                                                                                                                                                                                                                                          |                                                                                                                                                    |
|------------------------------------------------------------------------------------------------------------------------------------------------------------------------------------------------------------------------------------------------------------------------------------------|----------------------------------------------------------------------------------------------------------------------------------------------------|
| <p>EDS spectrum for Sample S1057. The y-axis is labeled 'cps/eV' and ranges from 0 to 24. The x-axis is labeled 'keV' and ranges from 0 to 10. Peaks are labeled: C (~0.27 keV), O (~0.51 keV), Fe (~0.71 keV), Mg (~1.30 keV), Al (~1.55 keV), Si (~1.74 keV), and Fe (~6.40 keV).</p>  | <p>SEM image of a round quartz particle. The scale bar indicates 1.00um. Metadata: S-5500 15.0kV 0.0mm x40.0k SE.</p>                              |
| <p>Sample S1057: Australia, Lake Eyre: Round quartz (Si) particle with small amounts of clay (Mg, Al), halite (Na) and iron oxide (Fe)</p>                                                                                                                                               |                                                                                                                                                    |
| <p>EDS spectrum for Sample S1057. The y-axis is labeled 'cps/eV' and ranges from 0 to 18. The x-axis is labeled 'keV' and ranges from 0 to 10. Peaks are labeled: O (~0.51 keV), Si (~1.74 keV), Al (~1.55 keV), Mg (~1.30 keV), K (~3.96 keV), Fe (~6.40 keV), and Na (~10.64 keV).</p> | <p>SEM image of a kaolinite particle. The scale bar indicates 1.00um. Metadata: S-5500 15.0kV 0.0mm x50.0k SE.</p>                                 |
| <p>Sample S1057: Australia, Lake Eyre: Kaolinite (Al, Si) particle with traces of illite (Mg, Al, Si) halite (Na) and iron oxides (Fe)</p>                                                                                                                                               |                                                                                                                                                    |
| <p>EDS spectrum for Sample S1058. The y-axis is labeled 'cps/eV' and ranges from 0 to 50. The x-axis is labeled 'keV' and ranges from 0 to 10. Peaks are labeled: O (~0.51 keV), Si (~1.74 keV), Al (~1.55 keV), and Na (~10.64 keV).</p>                                                | <p>SEM image of a quartz particle. The scale bar indicates 1.00um. Metadata: S-5500 30.0kV -0.1mm x30.0k SE.</p>                                   |
| <p>Sample S1058: Australia, Lake Frome: Quartz (Si) particle with trace of clay (Al, Si)</p>                                                                                                                                                                                             |                                                                                                                                                    |
| <p>EDS spectrum for Sample S1058. The y-axis is labeled 'cps/eV' and ranges from 0 to 24. The x-axis is labeled 'keV' and ranges from 0 to 10. Peaks are labeled: O (~0.51 keV), Na (~10.64 keV), Cl (~2.64 keV), and Si (~1.74 keV).</p>                                                | <p>SEM image of a cube of halite attached to a flake of illite clay. The scale bar indicates 1.00um. Metadata: S-5500 30.0kV -0.1mm x45.0k SE.</p> |
| <p>Sample S1058: Australia, Lake Frome: Cube of halite (Na, Cl) (to the right of particle) attached to a flake of illite clay</p>                                                                                                                                                        |                                                                                                                                                    |

Supplement S5.5 - SEM-based Secondary Electron Images and EDS Spectra

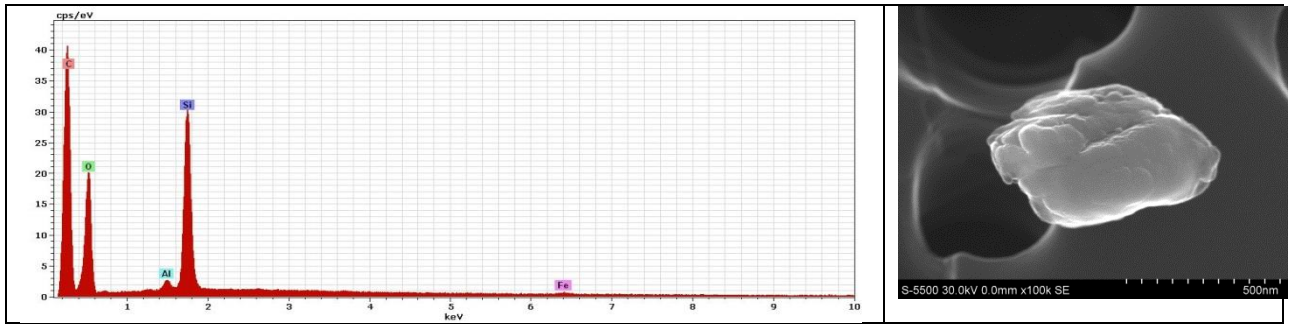

Sample S1060: Serbia, Batajnica: Quartz (Si) particle with trace amounts of clay (Al) and iron oxide (Fe)

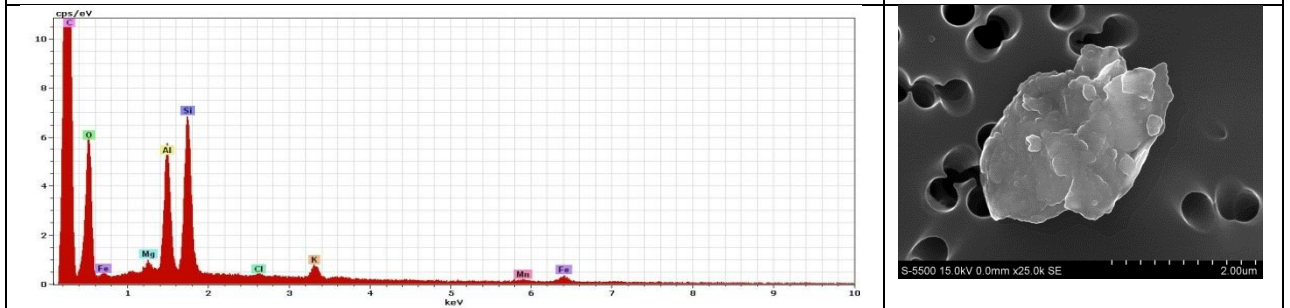

Sample S1062: Serbia, Kostolac: Particle composed of kaolinite (Al, Si) with small amount of illite (Mg, Al, Si, K, Fe, Mn)

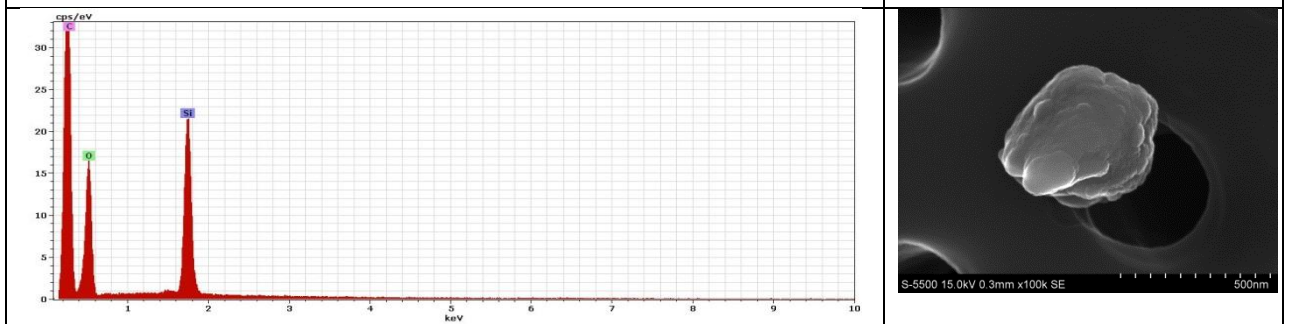

Sample S1062: Serbia, Kostolac: Rounded quartz (Si) particle

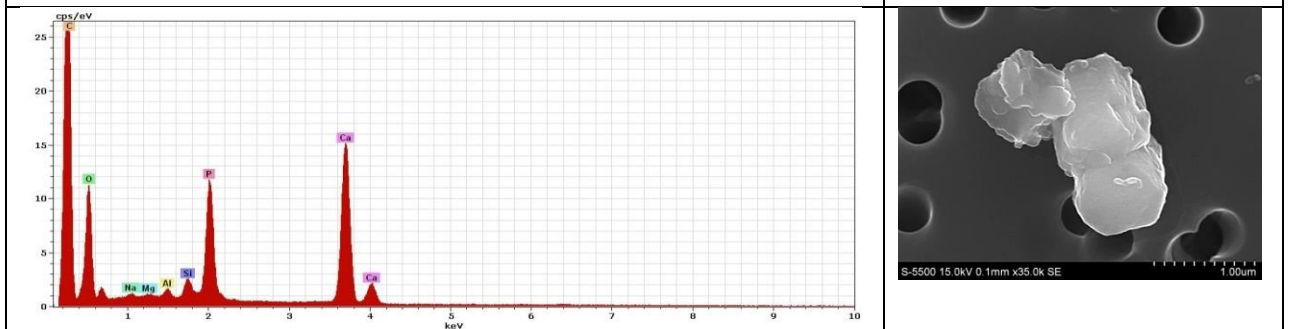

Sample S1064: Serbia, Stari Slankamen: Particle of apatite (Ca, P) with small amount of clay (Mg, Al, Si) and halite (Na)



Supplement S5.5 - SEM-based Secondary Electron Images and EDS Spectra

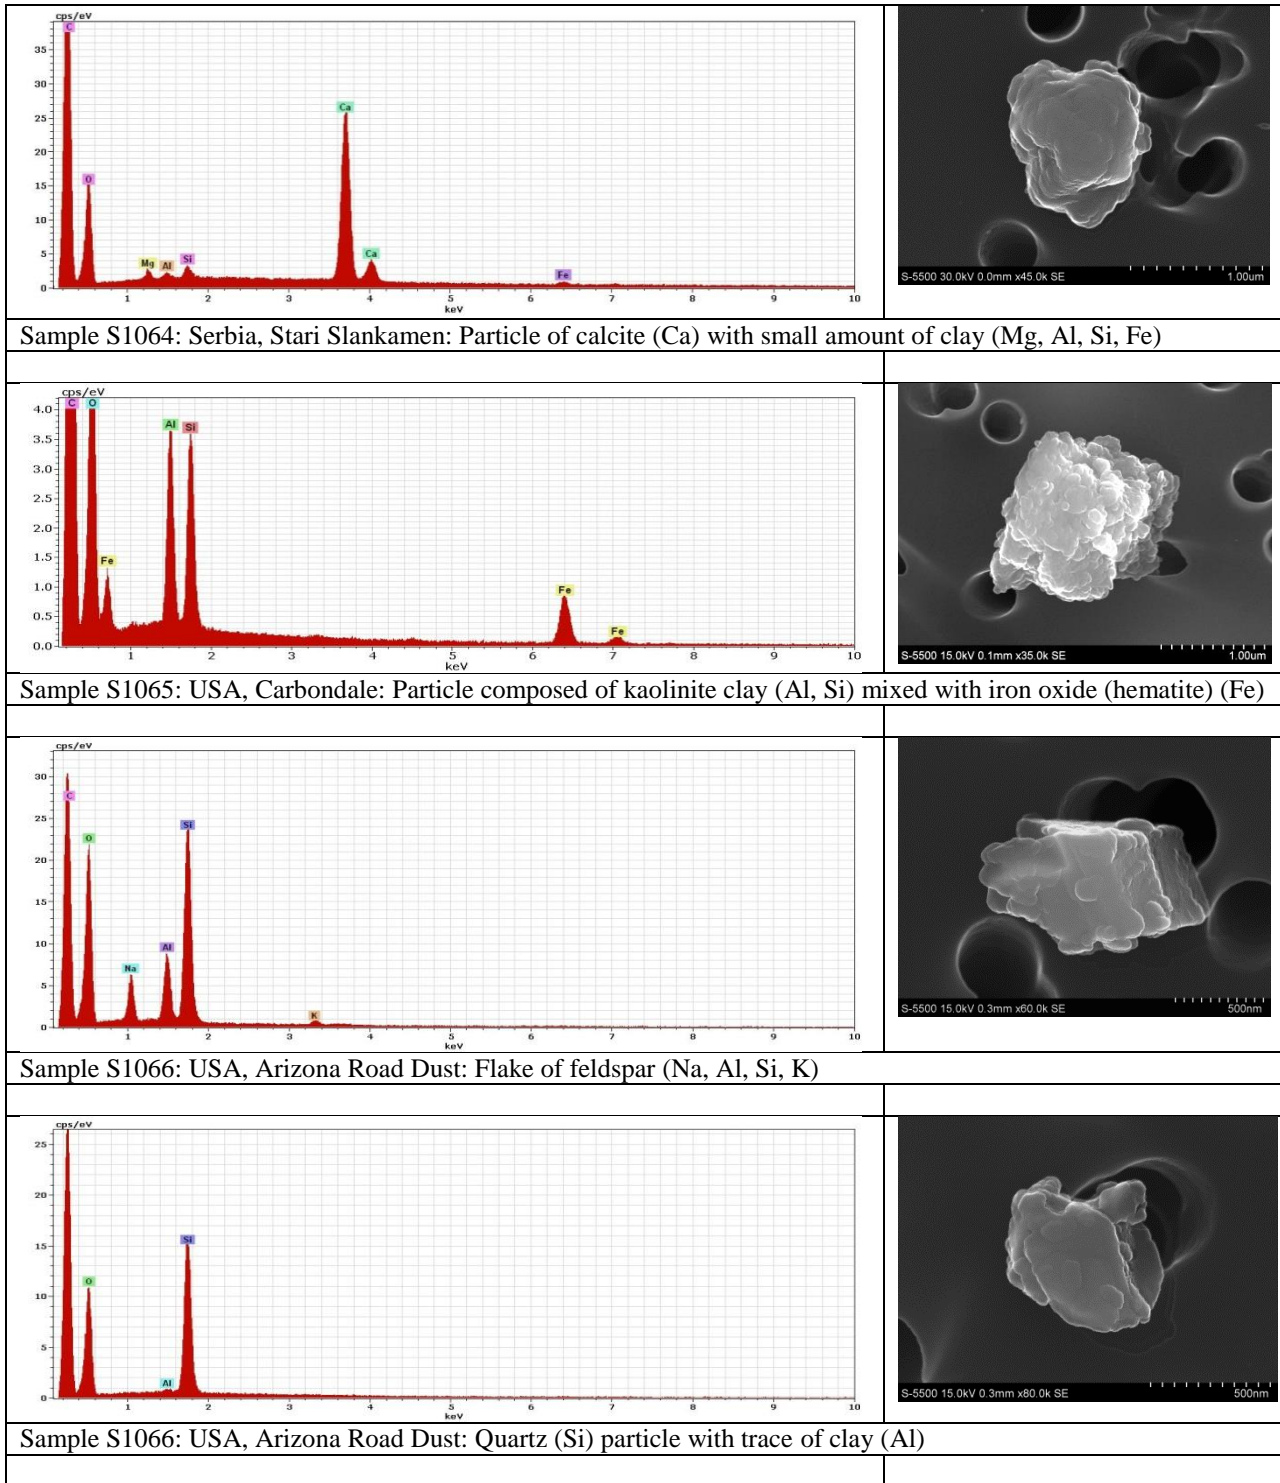

Supplement S5.5 - SEM-based Secondary Electron Images and EDS Spectra

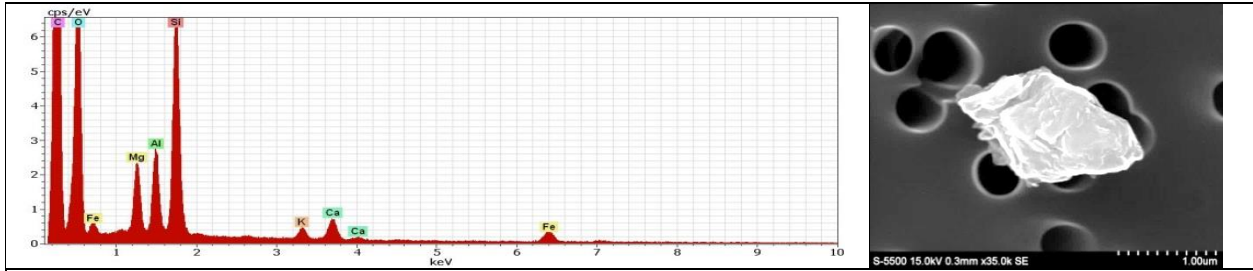

Sample S2001: Djibouti, Lemonnier: Illite clay (Mg, Al, Si, K, Fe) encapsulating a calcite (Ca) particle

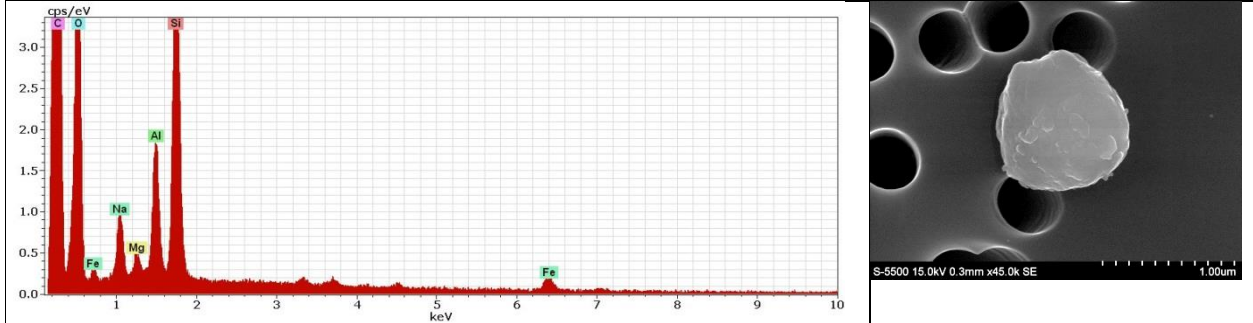

Sample S2001: Djibouti, Lemonnier: Plagioclase feldspar (Na, Al, Si) with small amount of surface clay (Mg, Al, Si)

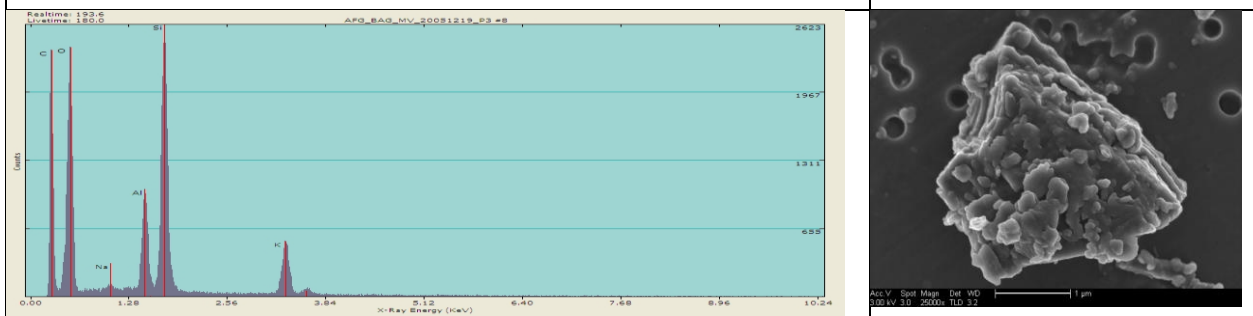

Sample S2002: Afghanistan, Bagram: Orthoclase feldspar (K, Na, Al, Si)

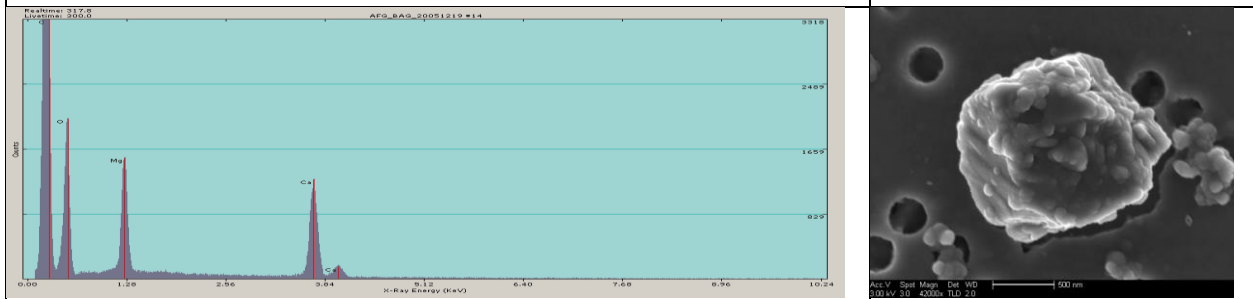

Sample S2002: Afghanistan, Bagram: Pseudo rhomb of dolomite (Mg, Ca)

Supplement S5.5 - SEM-based Secondary Electron Images and EDS Spectra

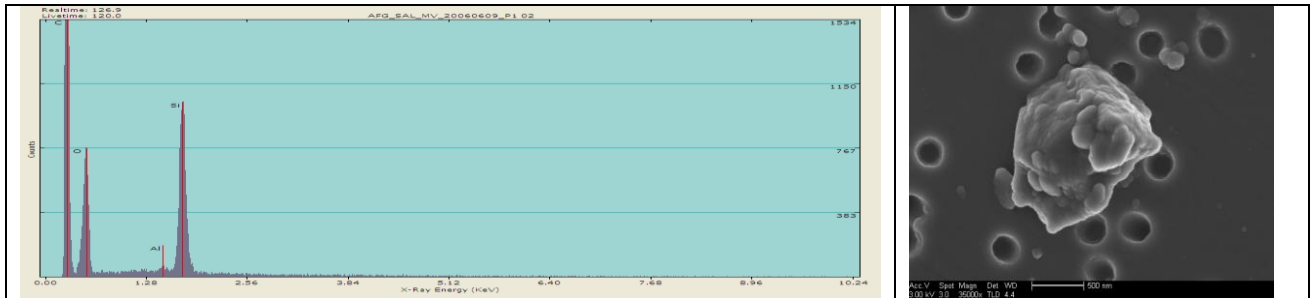

Sample S2003: Afghanistan, Khowst. Quartz (Si) particle with clay (Al) attached

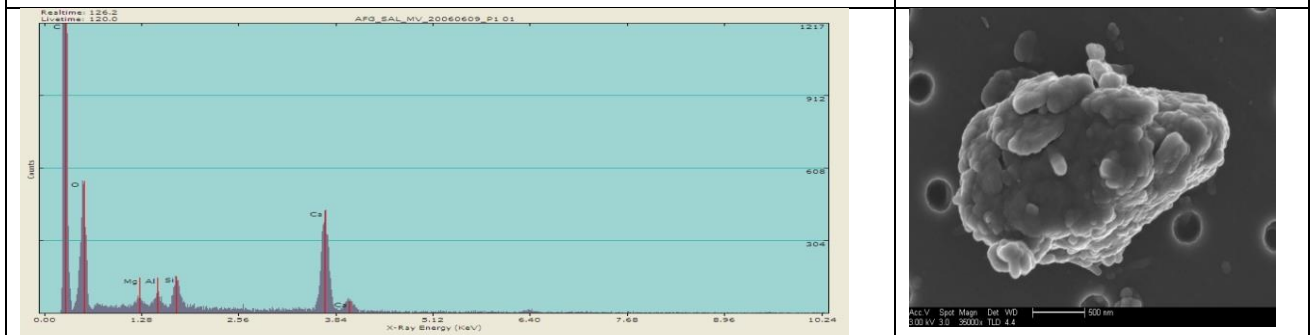

Sample S2003: Afghanistan, Khowst. Calcite (Ca) particle with finger shaped clay (Mg, Al, Si) particles on surface, possibly montmorillonite, illite or palygorskite

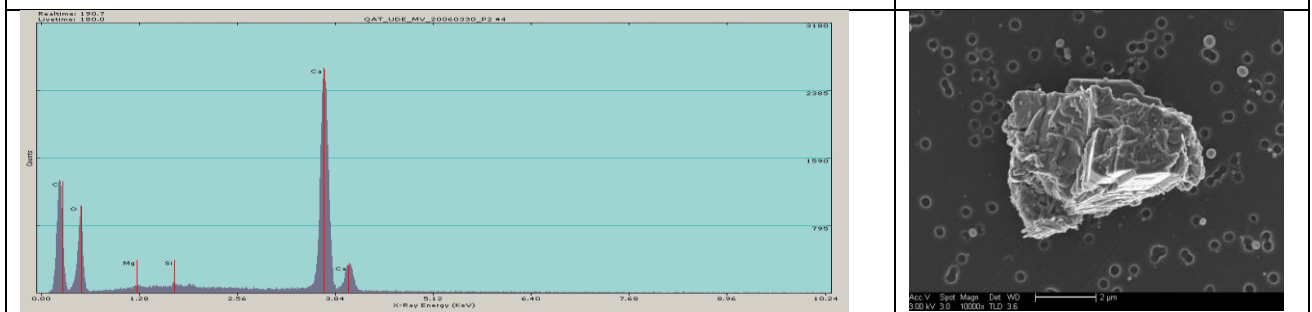

Sample S2004: Qatar, Al Udeid. Calcite (Ca) cleavage flake with trace amounts of clay (Mg)

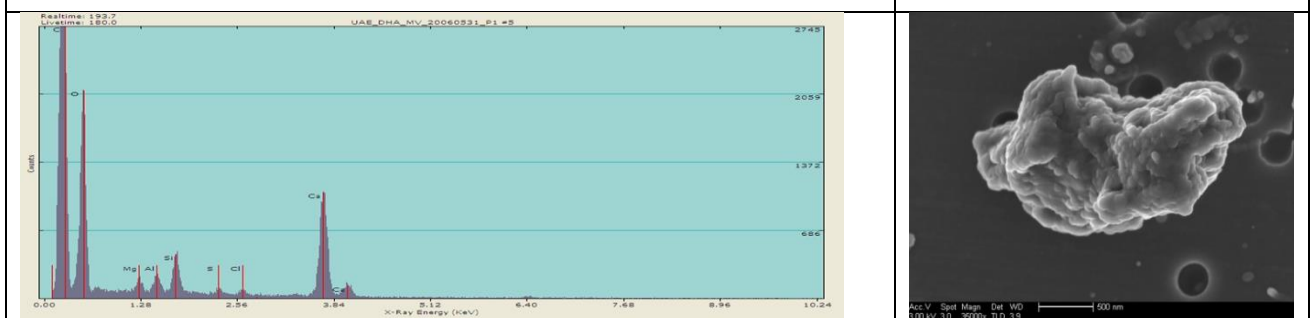

Sample S2005: UAE, Al Dhafra. Calcite (Ca) with small amounts of clay (Mg, Al, Si), and trace amounts of gypsum (Ca, S) and halite (Cl)

Supplement S5.5 - SEM-based Secondary Electron Images and EDS Spectra

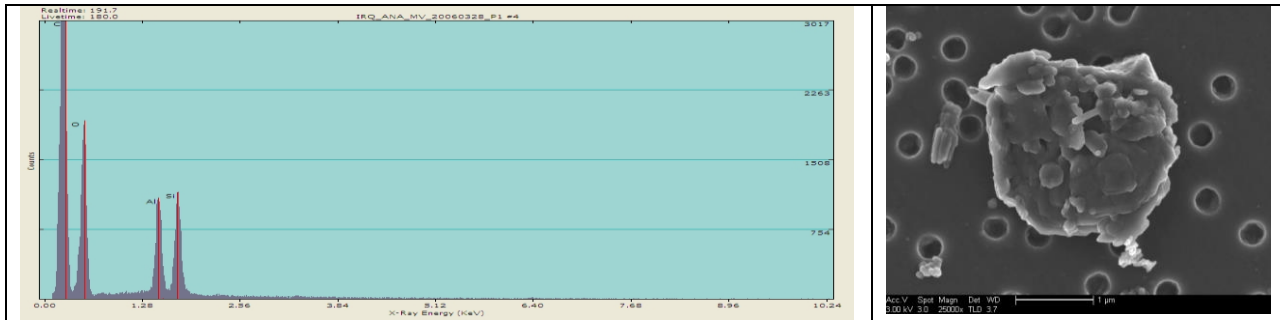

Sample S2006: Iraq, Balad. Particle largely of kaolinite (Al, Si) with needles of possible palygorskite attached

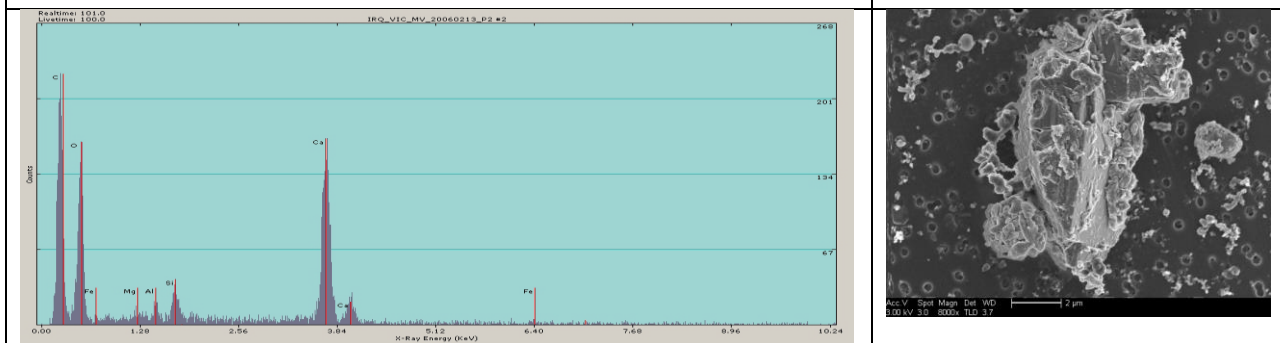

Sample S2007: Iraq, Baghdad. Rhomb of calcite (Ca) with small attachments of clay (Mg, Al, Si, Fe)

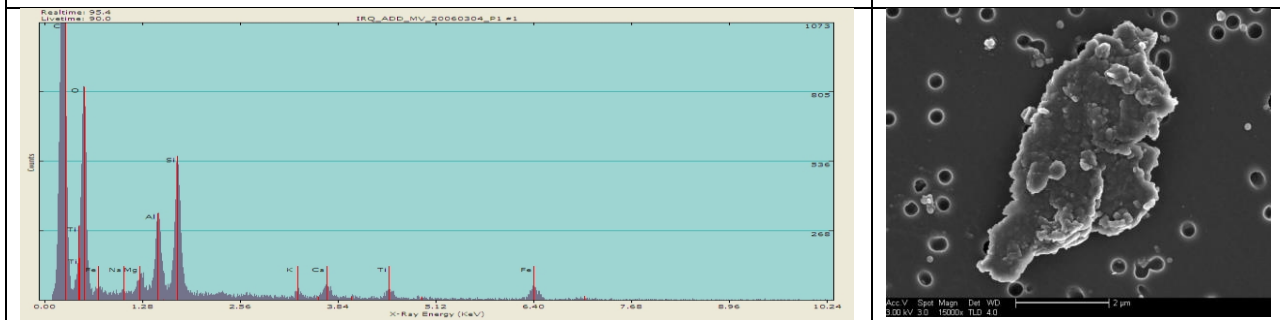

Sample S2008: Iraq, Tallil. Flake of possible illite (Mg, Al, Si, K, Fe) or mica (Mg, Al, Si, K, Ti, Fe) with small amount of calcite (Ca)

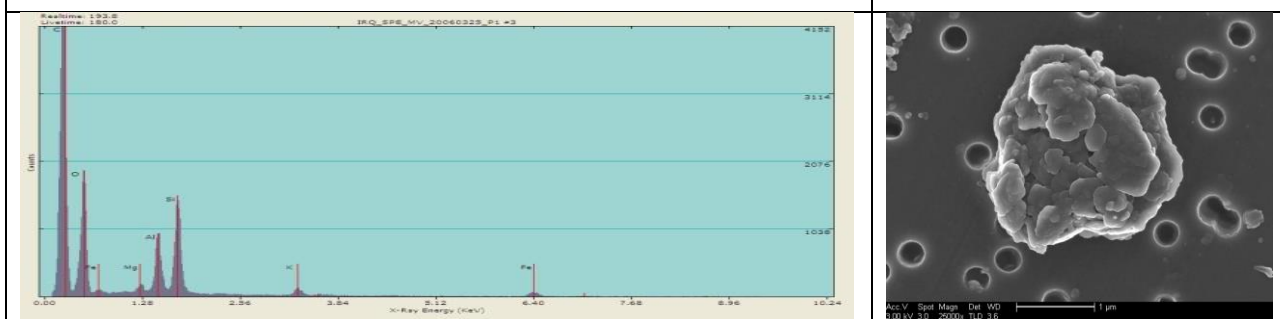

Sample S2009: Iraq, Tikrit. Composite flake of illite (Mg, Al, Si, K, Fe)

Supplement S5.5 - SEM-based Secondary Electron Images and EDS Spectra

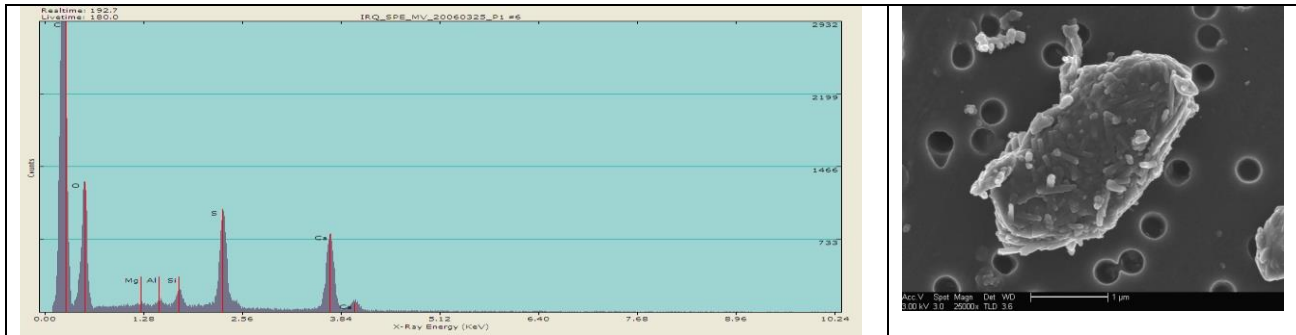

Sample S2009: Iraq, Tikrit. Rounded particle of gypsum ((S, Ca) with finger shaped particles of clay, possibly palygorkite (Mg, Al, Si) on the surface

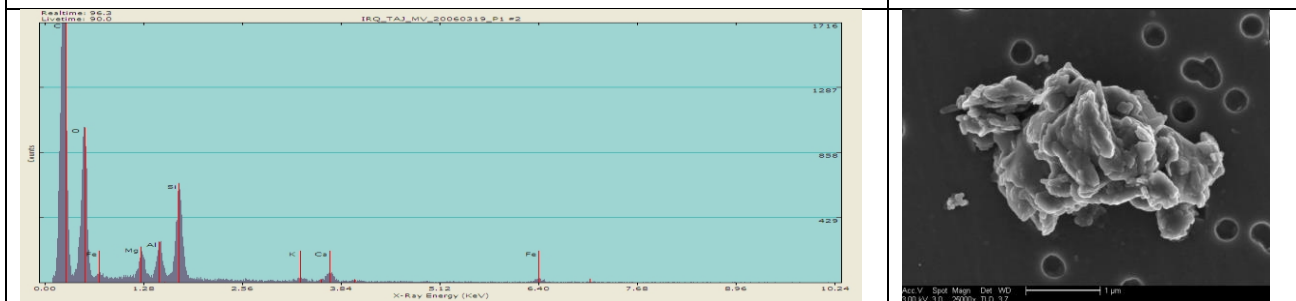

Sample S2010: Iraq, Taji. Cluster of illite (Mg, Al, Si, K, Fe) clay particles with a trace of calcite (Ca)

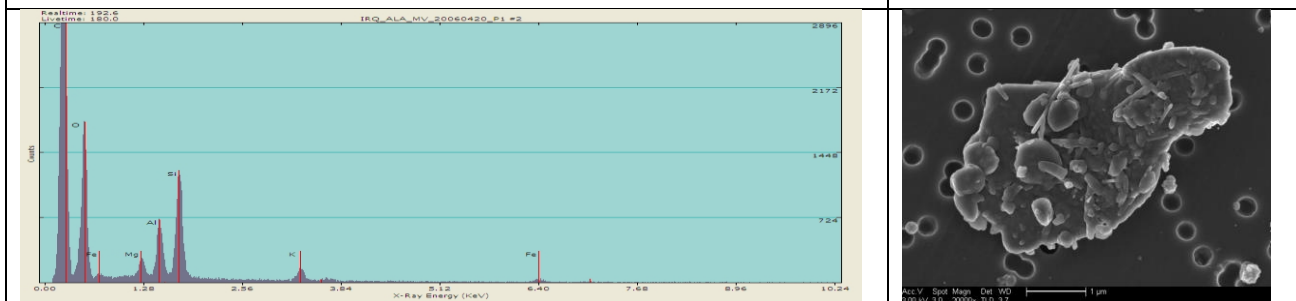

Sample S2011: Iraq, Al Asad. Flake of illite (Mg, Al, Si, K, Fe) with finger shaped palygorskite particles on the surface

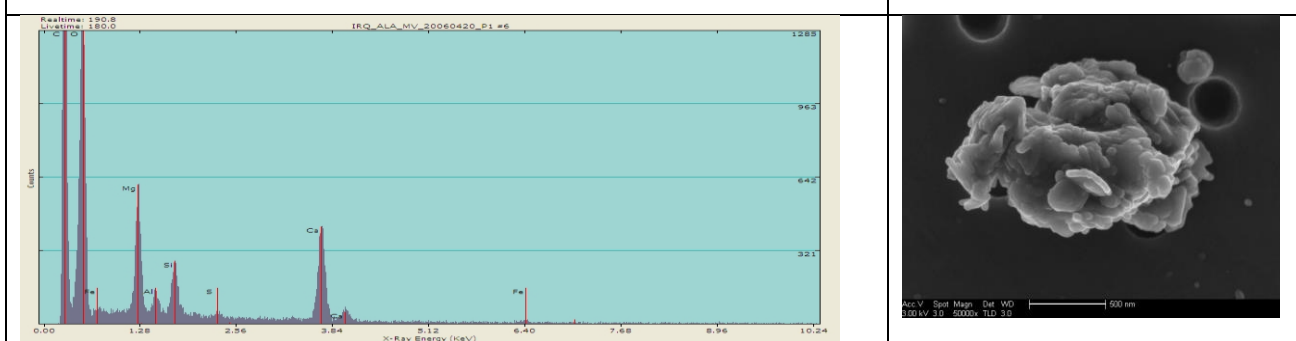

Sample S2011: Iraq, Al Asad. Cluster of dolomite crystals (Mg, Ca) small amounts of clay (Mg, Al, Si, Fe) and trace of gypsum (Ca, S)

Supplement S5.5 - SEM-based Secondary Electron Images and EDS Spectra

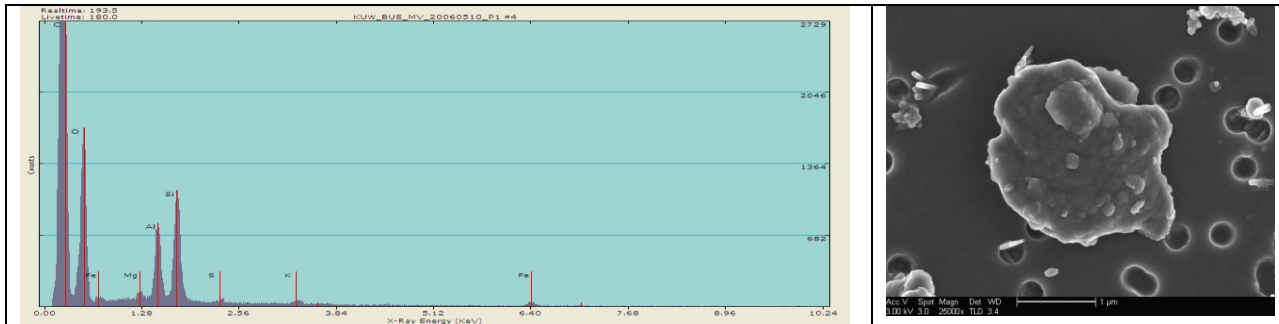

Sample S2012: Kuwait, Buehring. Particle of illite (Mg, Al, Si, K, Fe) clay and trace of gypsum (S)

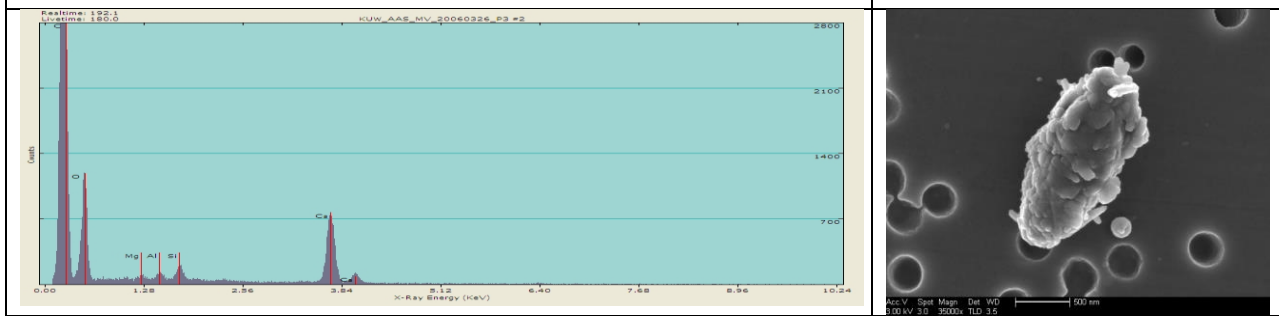

Sample S2013: Kuwait, Ali Al Salem. Particle of calcite (Ca) with coating of finger shaped clay particles, possibly palygorskite (Mg, Al, Si)

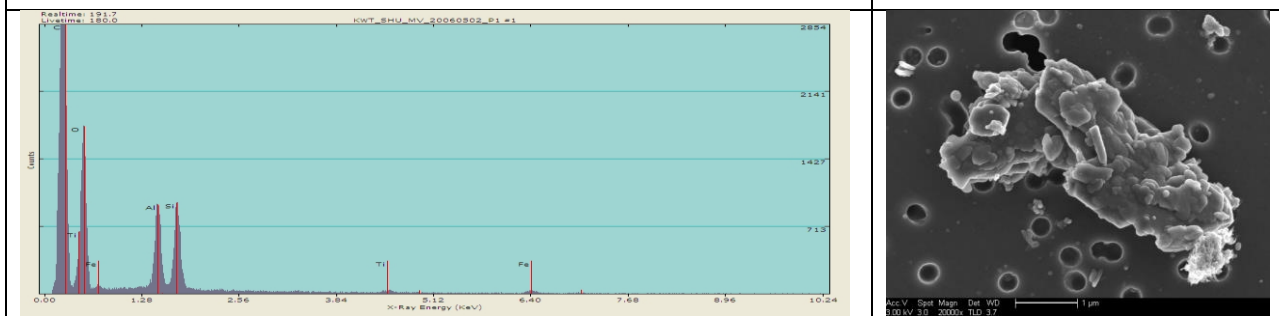

Sample S2014: Kuwait, Ash Shu Ayabah. Kaolinite (Al, Si) with smaller particles of other clay minerals attached

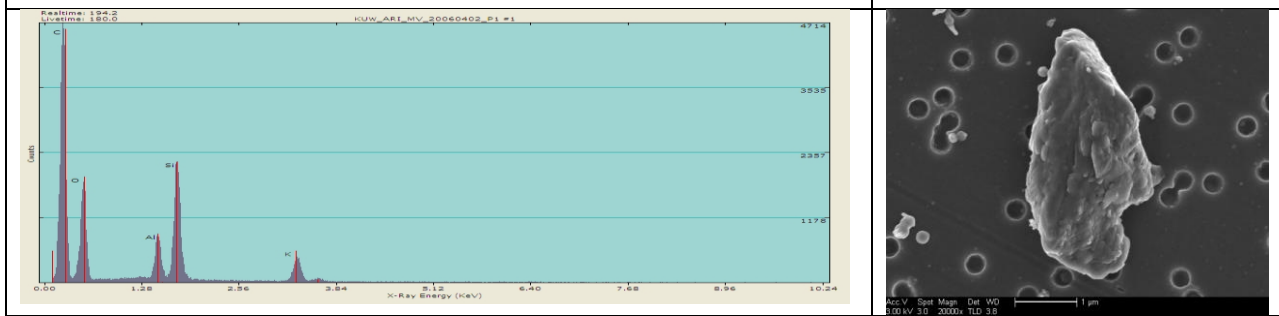

Sample S2015: Kuwait, Arifjan. Particle of potassium feldspar (orthoclase) (Al, Si, K)

Supplement S5.5 - SEM-based Secondary Electron Images and EDS Spectra

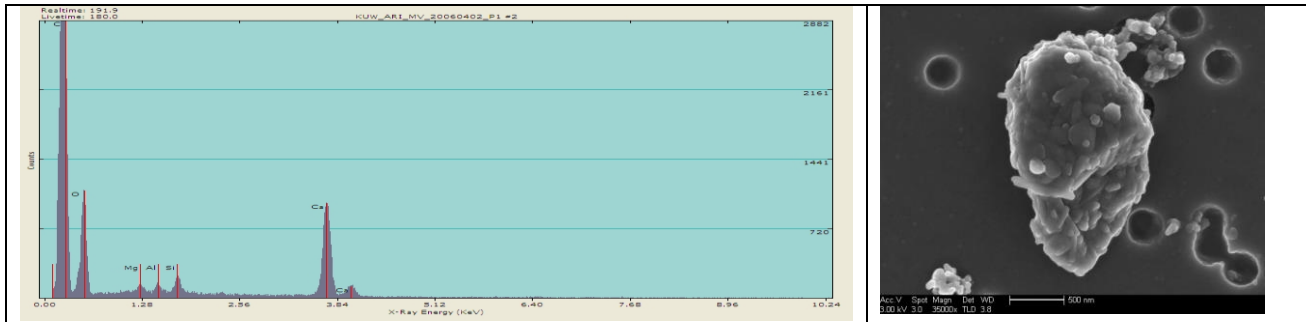

Sample S2015: Kuwait, Arifjan. Particle of calcite (Ca) with finger shaped particles of palygorskite (Mg, Al, Si) clay on surface

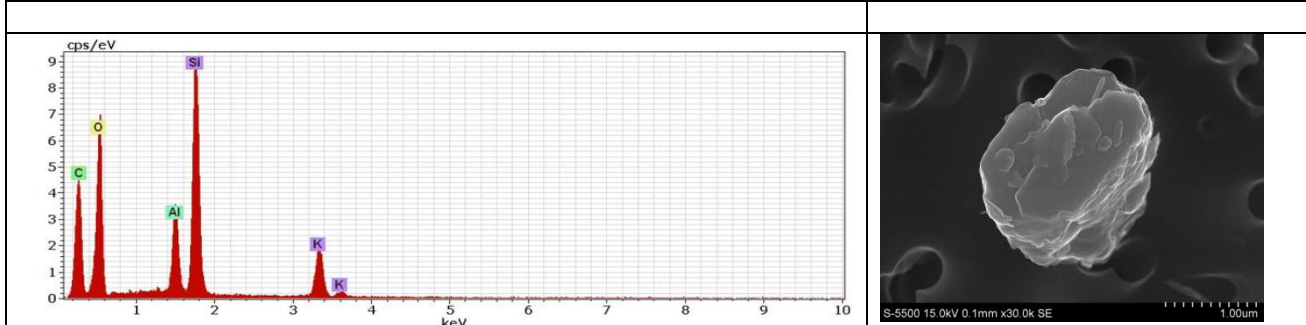

Sample S2016: Afghanistan, Leatherneck. Particle of potassium feldspar (orthoclase) (Al, Si, K)

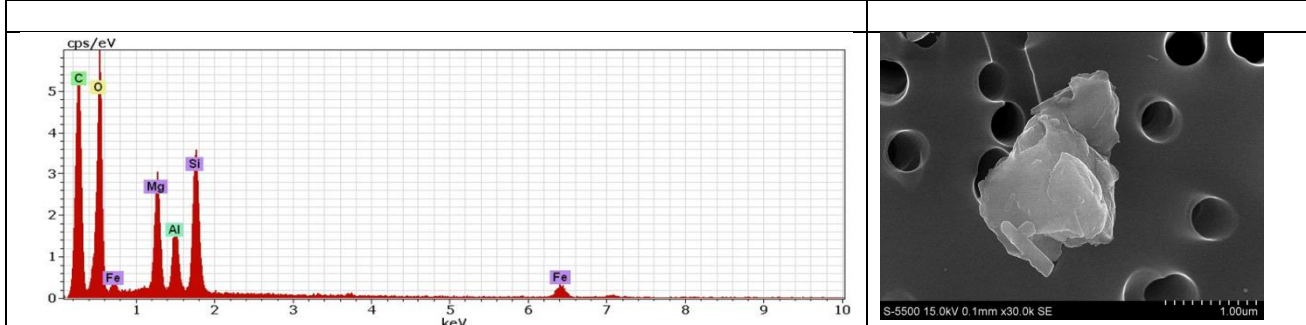

Sample S2016: Afghanistan, Leatherneck. Particle of possibly palygorskite (Mg, Al, Si) and iron oxide (Fe)

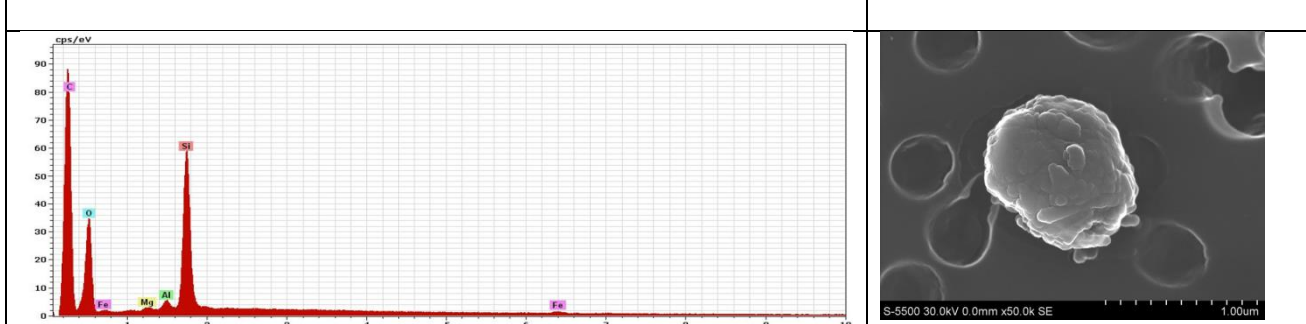

Sample S2016: Afghanistan, Leatherneck. Round quartz (Si) grain with coating of clay (Mg, Al, Si, Fe)

Supplement S5.5 - SEM-based Secondary Electron Images and EDS Spectra

|                                                                                                                          |  |
|--------------------------------------------------------------------------------------------------------------------------|--|
|                                                                                                                          |  |
| <p>Sample S2016: Afghanistan, Leatherneck. Micro-sheets of biotite (Mg, Al, Si, K, Fe)</p>                               |  |
|                                                                                                                          |  |
| <p>Sample S2017: Kuwait, Ash Shu Ayabah. Crystal of orthoclase feldspar (Al, Si, K)</p>                                  |  |
|                                                                                                                          |  |
| <p>Sample S2017: Kuwait, Ash Shu Ayabah. Eroded crystal of calcite (Ca) with trace of attached clay (Mg, Al, Si)</p>     |  |
|                                                                                                                          |  |
| <p>Sample S3003: USA, Arizona, Yuma. Well rounded quartz particle with trace of attached (coating) clay (Mg, Al, Si)</p> |  |



Supplement S5.5 - SEM-based Secondary Electron Images and EDS Spectra

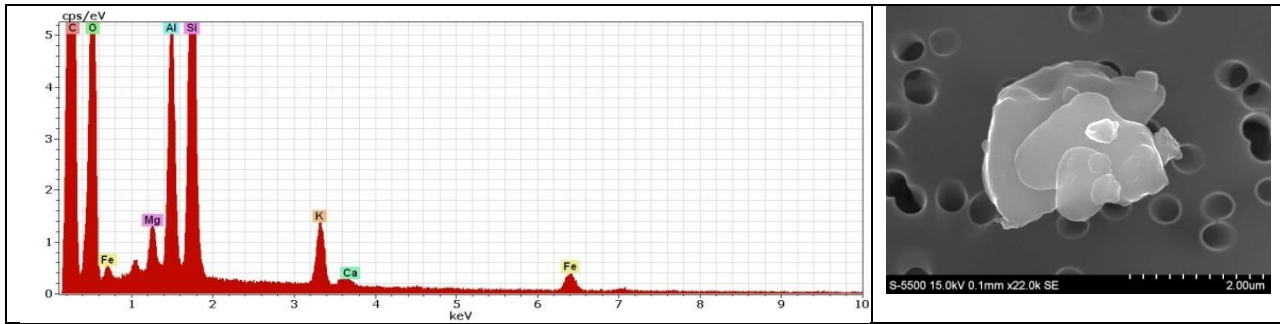

Sample S3003: USA, Arizona, Yuma. Biotite (Mg, Al, Si, K, Fe) flakes with trace of calcite (Ca)

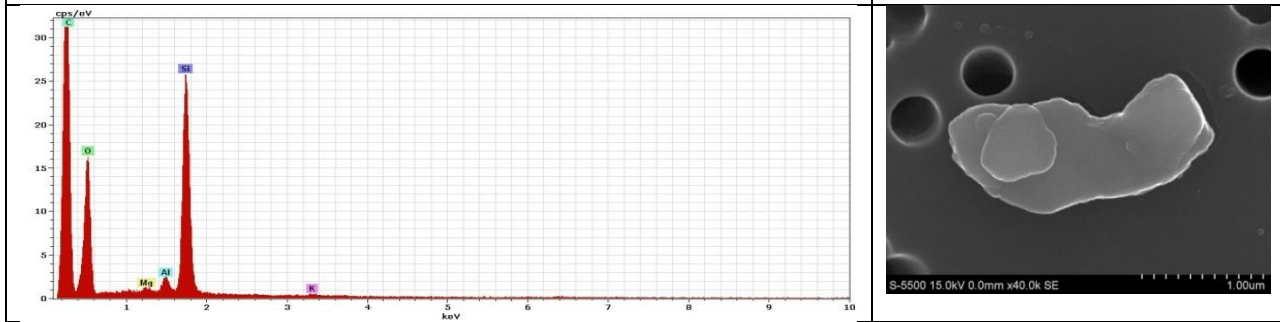

Sample S3004: USA, Arizona, Yuma. Irregularly shaped quartz (Si) particle with trace coating of illite (Mg, Al, Si, K)

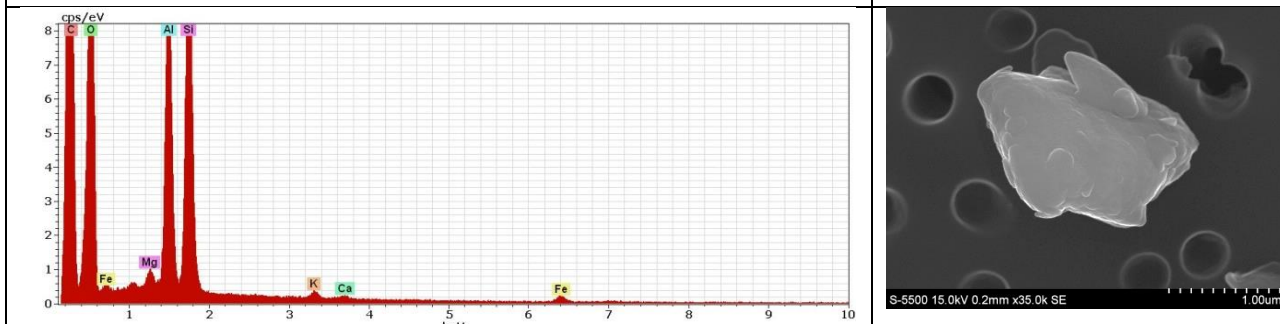

Sample S3004: USA, Arizona, Yuma. Particle of kaolinite (Al, Si) with trace amounts of illite (Mg, Al, Si, K) and calcite

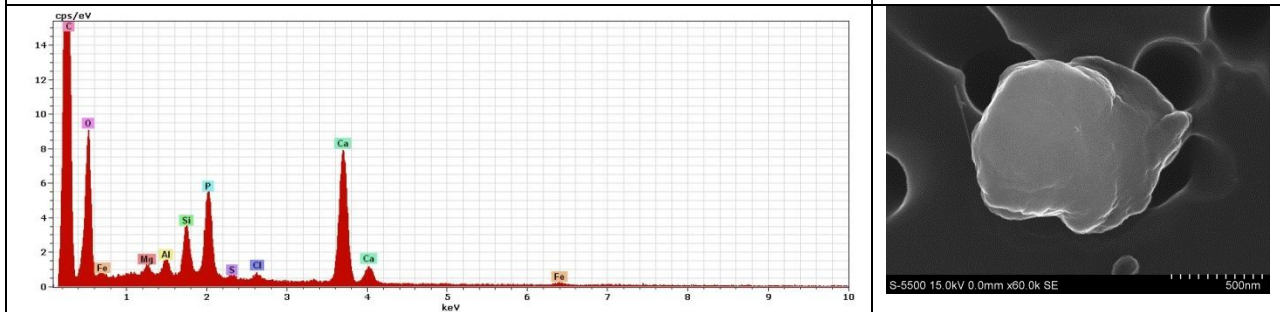

Sample S3008: USA, Arizona, Yuma. Composite particle of apatite (P, Ca) with small amounts of clay (Mg, Al, Si, Fe) and traces of gypsum (S, Ca) and halite (Cl)

Supplement S5.5 - SEM-based Secondary Electron Images and EDS Spectra

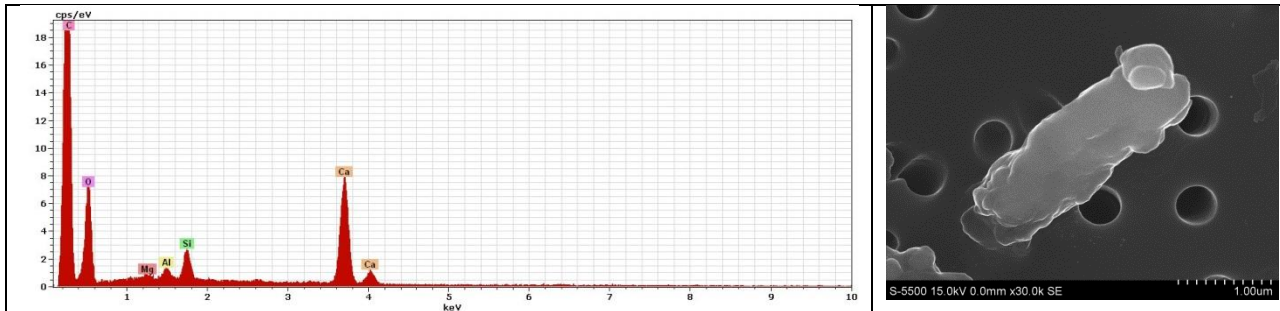

Sample S3008: USA, Arizona, Yuma. Particle of calcite (Ca) with coating of clay (Mg, Al, Si)

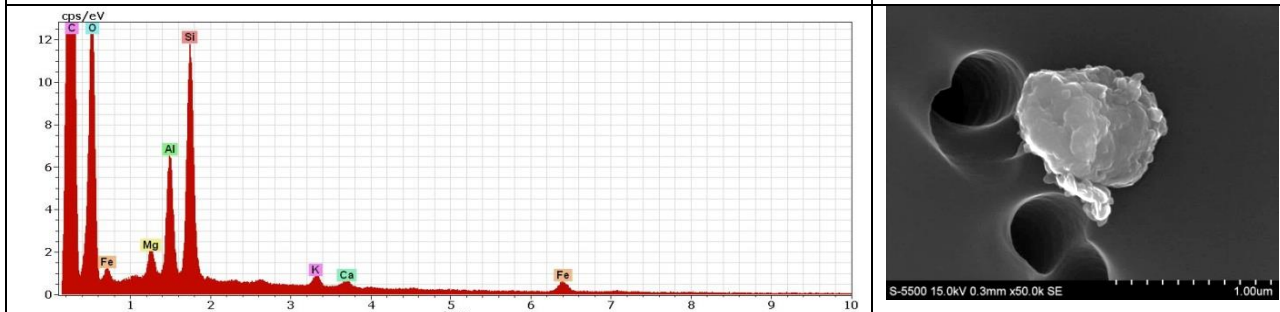

Sample S3011: USA, Colorado, Ft Carson. Cluster of illite/montmorillonite (Mg, Al, Si, K, Ca, Fe) clay particles

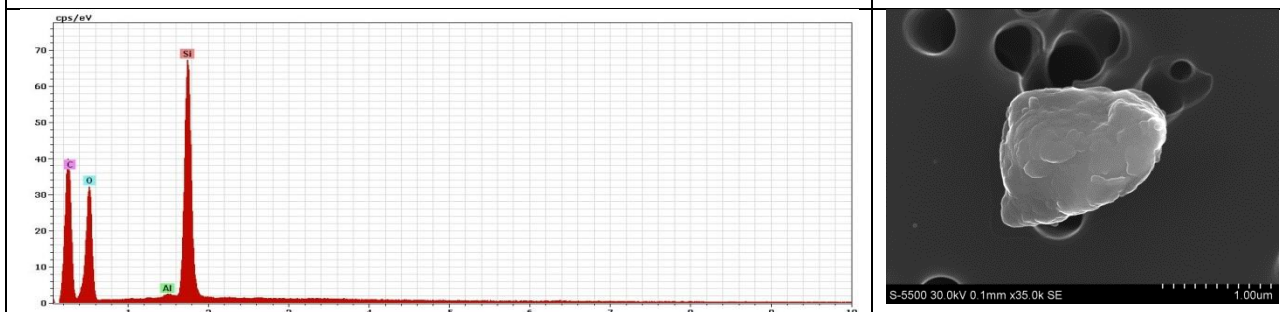

Sample S3011: USA, Colorado, Ft Carson. Rounded particle of quartz (Si) with clay (Al, Si) coating

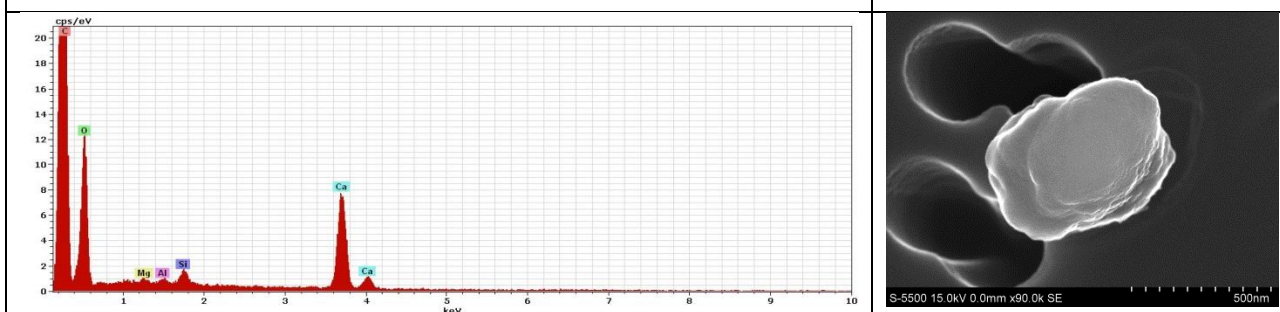

Sample S3016: USA, Utah, Dugway. Rounded particle of calcite (Ca) with a coating of clay (Mg, Al, Si)

Supplement S5.5 - SEM-based Secondary Electron Images and EDS Spectra

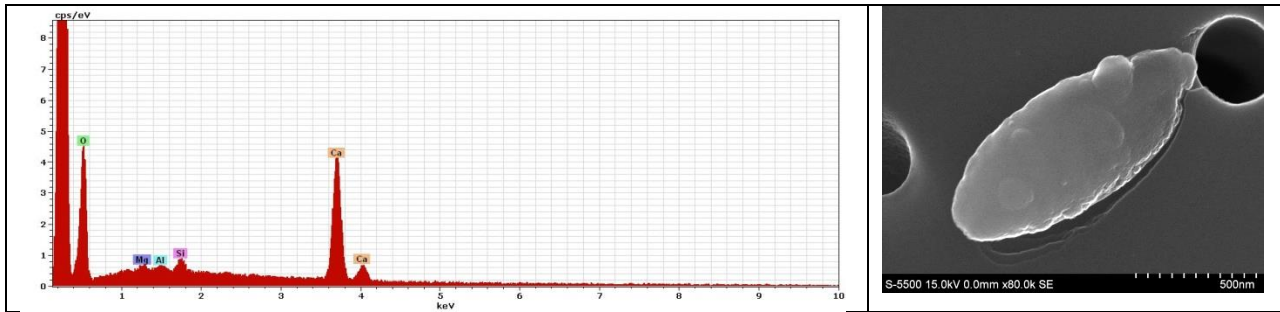

Sample S3016: USA, Utah, Dugway. Oblong-shaped particle of calcite (Ca) possibly of biogenetic origin with a coating of clay (Mg, Al, Si)

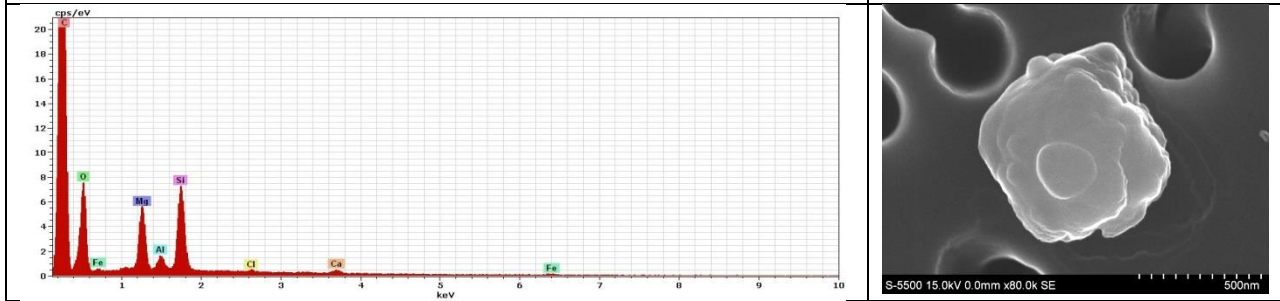

Sample S3016: USA, Utah, Dugway. Rounded particle of palygorskite or serpentine (Mg, Si) with coating of illite clay (Mg, Al, Si, Fe) and trace of halite (Cl)

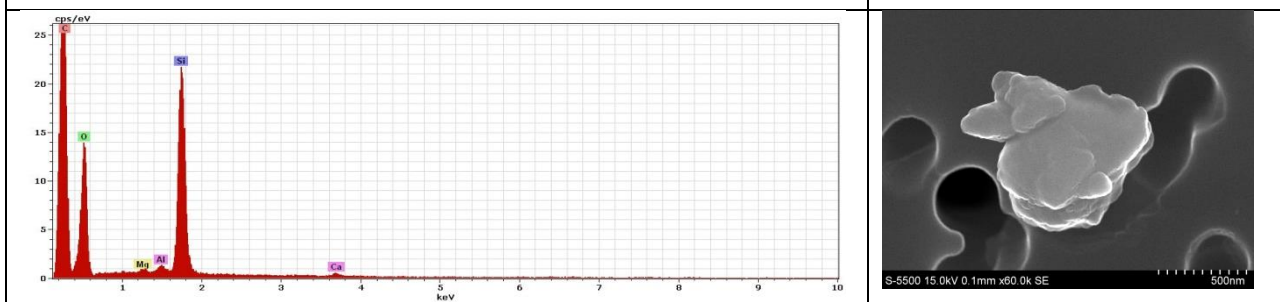

Sample S3017: USA, Utah, Dugway. Irregularly shaped particle of quartz (Si) with trace of clay (Mg, Al, Si) and calcite (Ca)

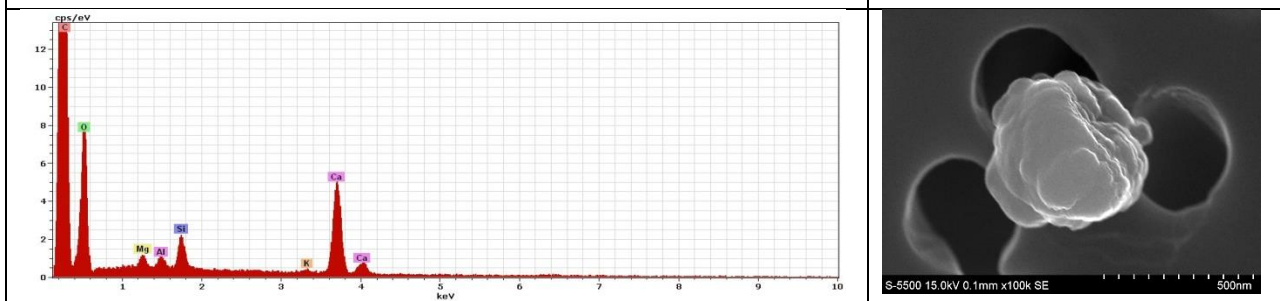

Sample S3017: USA, Utah, Dugway. Composite particle of calcite (Ca) with component (coating) of illite (Mg, Al, Si) clay
